# Supplementary material for: Investigation of the Entry Pathway and Molecular Nature of σ1 Receptor Ligands
Source: MDPI journal article supplement (doi:10.3390/ijms24076367), 2023-03-28

## Legends to Supplementary Tables S1–S4 and S6–S8

**Supplementary Table S1.** Results of VS experiments against the 3D structure of *Hs*σ1-R in coordinate file 5HK1\_A. Only hits whose calculated interaction energy with the target structure is  $\leq 3.0$  kcal/mol higher than that of the best hit are reported. Database ID: Database identifier. Compound name: Common name of the compound. Category: Category to which each compound is assigned. Ago-Ant: known σ1-R and/or σ2-R binder. Metab, FDA and World: molecules tagged as “metabolites+for sale”, “FDA approved+for sale” and “World-not FDA+for sale” in the ZINC15 database (43). Ste\_Lip, Sterols, Steroids, Androg, Estrog, Chol\_P and Ergo\_P: molecules belonging to the sterol\_lipids, sterols, steroids, androgens, estrogens, cholesterol or ergosterol biosynthetic pathway and available for sale in the LIPID MAPS database (44).  $E_{calc}$  (kcal/mol): calculated interaction energy between each compound and the target protein. HB, CL, Contacts: Hydrogen bonds, unfavorable van der Waals contacts and overall contacts between each compound and the target protein, respectively.

**Supplementary Table S2.** Results of VS experiments against the 3D structure of *Hs*σ1-R in coordinate file 6DK1\_A. Only hits whose calculated interaction energy with the target structure is  $\leq 3.0$  kcal/mol higher than that of the best hit are reported. All abbreviations are as in Supplementary Table 4->1.

**Supplementary Table S3.** Comparison between the results of VS experiments against the 3D structures of *Hs*σ1-R in coordinate files 5HK1 and 6DK1. Only hits whose calculated interaction energy with each target structure is  $\leq 3.0$  kcal/mol higher than that of the best hit are reported. All abbreviations are as in Supplementary Table 4->1.

**Supplementary Table S4.** Results of VS experiments against the yeast ERG2 molecular model. Only hits whose calculated interaction energy with the target structure is  $\leq 3.0$  kcal/mol higher than that of the best hit are reported. All abbreviations are as in Supplementary Table 4->1.

**Supplementary Table S6.** Results of VS experiments against the *Xl*σ1-R structure in coordinate file 7W2B. Only hits whose calculated interaction energy with the target structure is  $\leq 3.0$  kcal/mol higher than that of the best hit are reported. All abbreviations are as in Supplementary Table 4->1.

**Supplementary Table S7.** Results of VS experiments against the *Xl*σ1-R structure in coordinate file 7W2E. Only hits whose calculated interaction energy with the target structure is  $\leq 3.0$  kcal/mol higher than that of the best hit are reported. All abbreviations are as in Supplementary Table 4->1.

**Supplementary Table S8.** Comparison between the results of VS experiments against the 3D structures of *Xl*σ1-R in coordinate files 7W2B and 7W2E. Only hits whose calculated interaction energy with each target structure is  $\leq 3.0$  kcal/mol higher than that of the best hit are reported. All abbreviations are as in Supplementary Table 4->1.

**Supplementary Table S5.** Results of VS experiments against the 3D structure of *Hs* $\sigma$ 1-R in coordinate files 5HK1\_A and 6DK1\_A, for low affinity *Hs* $\sigma$ 1-R binders. Compound\_name: Common name of compounds that are reported to bind human  $\sigma$ 1R with the lowest affinity (i.e.,  $K_i > 10,000$  nM) in the PDSP  $K_i$  database. ZINC\_ID: ZINC database identifier. Rank: Position in the  $E_{calc}$ -based ranking.  $E_{calc}$  (kcal/mol): calculated interaction energy between each compound and the target protein. Hb, Cl, Con: Hydrogen bonds, unfavorable van der Waals contacts and overall contacts between each compound and the target protein, respectively.

| Compound_name    | ZINC_ID          | 5HK1  |       |    |    |     | 6DK1  |       |    |    |     |
|------------------|------------------|-------|-------|----|----|-----|-------|-------|----|----|-----|
|                  |                  | Rank  | Ecalc | Hb | Cl | Con | Rank  | Ecalc | Hb | Cl | Con |
| THC              | ZINC000001530625 | 1992  | -9.9  | 0  | 1  | 57  | 6378  | -9.0  | 0  | 1  | 49  |
| Naringenin       | ZINC000000156701 | 2721  | -9.6  | 0  | 0  | 47  | 5457  | -9.3  | 0  | 0  | 39  |
| Epigallocatechin | ZINC000003870336 | 4217  | -9.1  | 0  | 0  | 48  | 7745  | -8.6  | 0  | 0  | 45  |
| Catechin         | ZINC000000119978 | 4793  | -8.9  | 0  | 0  | 42  | 5150  | -9.4  | 0  | 0  | 38  |
| Tasimelteon      | ZINC000004392649 | 7334  | -8.2  | 0  | 0  | 38  | 5216  | -9.4  | 0  | 0  | 57  |
| Tramadol(+/-)    | ZINC000000000853 | 7960  | -8.0  | 0  | 0  | 51  | 9819  | -8.0  | 0  | 0  | 33  |
| Isoginkgetin     | ZINC000003197535 | 10549 | -7.4  | 0  | 1  | 41  | 11698 | -7.5  | 0  | 3  | 126 |
| Amentoflavone    | ZINC000003984030 | 10565 | -7.4  | 0  | 0  | 39  | 4641  | -9.6  | 0  | 3  | 115 |
| Morphine         | ZINC000003812983 | 12409 | -7.0  | 0  | 1  | 62  | 5813  | -9.2  | 0  | 0  | 48  |
| Oxymorphone      | ZINC000003875483 | 14612 | -6.6  | 0  | 4  | 73  | 8075  | -8.5  | 0  | 0  | 42  |
| Hydromorphone    | ZINC000000402954 | 14991 | -6.5  | 0  | 3  | 67  | 5154  | -9.4  | 0  | 0  | 48  |
| Oxycodone        | ZINC000000403533 | 16601 | -6.2  | 0  | 4  | 69  | 8689  | -8.3  | 0  | 0  | 41  |

**Supplementary Table S9.** RMSD values calculated after optimal all-against-all structure superposition of *X*/ $\sigma$ 1R monomers superposition of all monomers with chain ID “A” in each PDB file. Residues used for the superpositions are the same used for intra-structure comparisons in the case of C $\alpha$  atoms. Since residues at positions 179 and 203 are mutated in coordinate file with PDB ID 7ZWH with respect to all other coordinate files, residues included in all atoms superpositions were 31-178, 180-202 and 204-216, for a total of 2914 atoms. Med, Ave, St Dev, Min, Max: Median, average, standard deviation, minimum and maximum value. RMSD C $\alpha$  and RMSD all: RMSD values calculated after optimal structure superposition of C $\alpha$  and all atoms, respectively.

| Inter-structure comparison, RMSD C $\alpha$ |      |      |        |      |      |      |      |
|---------------------------------------------|------|------|--------|------|------|------|------|
|                                             | 7W2B | 7W2C | 7W2D   | 7W2E | 7W2F | 7W2G | 7W2H |
| 7W2B                                        | -    |      |        |      |      |      |      |
| 7W2C                                        | 0.18 | -    |        |      |      |      |      |
| 7W2D                                        | 0.22 | 0.25 | -      |      |      |      |      |
| 7W2E                                        | 0.60 | 0.57 | 0.58   | -    |      |      |      |
| 7W2F                                        | 0.59 | 0.56 | 0.57   | 0.14 | -    |      |      |
| 7W2G                                        | 0.60 | 0.57 | 0.58   | 0.14 | 0.12 | -    |      |
| 7W2H                                        | 0.43 | 0.4  | 0.41   | 0.35 | 0.35 | 0.36 | -    |
|                                             | Med  | Ave  | St Dev | Min  | Max  |      |      |
|                                             | 0.41 | 0.41 | 0.18   | 0.12 | 0.60 |      |      |

| Inter-structure comparison, RMSD All atoms |      |      |        |      |      |      |      |
|--------------------------------------------|------|------|--------|------|------|------|------|
|                                            | 7W2B | 7W2C | 7W2D   | 7W2E | 7W2F | 7W2G | 7W2H |
| 7W2B                                       | -    |      |        |      |      |      |      |
| 7W2C                                       | 0.37 | -    |        |      |      |      |      |
| 7W2D                                       | 0.42 | 0.33 | -      |      |      |      |      |
| 7W2E                                       | 1.05 | 1.04 | 1.03   | -    |      |      |      |
| 7W2F                                       | 1.05 | 1.04 | 1.04   | 0.26 | -    |      |      |
| 7W2G                                       | 1.05 | 1.04 | 1.04   | 0.28 | 0.23 | -    |      |
| 7W2H                                       | 0.85 | 0.78 | 0.79   | 0.72 | 0.74 | 0.74 | -    |
|                                            | Med  | Ave  | St Dev | Min  | Max  |      |      |
|                                            | 0.79 | 0.76 | 0.31   | 0.23 | 1.05 |      |      |

**Supplementary Table S10.** 3D structures of  $X/\sigma 1$ -R available from the PDB. PDB ID: PDB identifier. Method: Experimental methods of 3D structure determination. X-ray: X-ray crystallography. Res. (Å): Resolution (angstrom). Chains: Chain identifier in the PDB file. A.a.: Amino acid residues in the protein. SOI: Ligand that is subject of investigation. E84: 2-morpholin-4-ylethyl 1-phenylcyclohexane-1-carboxylate; 88E: 4-[2-(5-methyl-1-naphthalen-2-yl-pyrazol-3-yl)oxyethyl]morpholine. Ligand: Ligand that is not a subject of investigation. BOG: octyl beta-D-glucopyranoside; Au: gold ion. Form: protein conformation. Mutations: Residues mutated with respect to the WT protein.

| PDB ID | Method | Res. (Å) | Chains | a.a.  | SOI | Ligand  | Form      | Mutations    |
|--------|--------|----------|--------|-------|-----|---------|-----------|--------------|
| 7W2B   | X-ray  | 3.20     | A-L    | 1-221 | -   | BOG, Au | closed    | -            |
| 7W2C   | X-ray  | 3.33     | A-L    | 1-221 | E84 | BOG, Au | closed    | -            |
| 7W2D   | X-ray  | 3.47     | A-L    | 1-221 | 88E | Au      | closed    | -            |
| 7W2E   | X-ray  | 3.56     | A-L    | 1-221 | -   | -       | open-like | -            |
| 7W2F   | X-ray  | 3.10     | A-L    | 1-221 | E84 | BOG     | open-like | -            |
| 7W2G   | X-ray  | 2.85     | A-L    | 1-221 | E84 | BOG     | open-like | -            |
| 7W2H   | X-ray  | 3.80     | A-X    | 1-221 | 88E | -       | open-like | Y179C, Y203C |

**Supplementary Table S11.** RMSD values calculated after optimal all-against-all structure superposition of  $X/\sigma 1$ R monomers within the same coordinate file. Residues 31-216 are used for all superpositions since they comprise the whole ligand binding domain and are present in all monomers. These comprise 186 C $\alpha$  atoms, and 2938 and 2954 total atoms for PDB ID 7W2H and for all other PDB IDs, respectively. Med, Ave, St Dev, Min, Max: Median, average, standard deviation, minimum and maximum value. RMSD C $\alpha$  and RMSD all: RMSD values calculated after optimal structure superposition of C $\alpha$  and all atoms, respectively.

| Intra-structure comparison, RMSD C $\alpha$ |        |      |      |        |      |      |
|---------------------------------------------|--------|------|------|--------|------|------|
| PDB ID                                      | Chains | Med  | Ave  | St Dev | Min  | Max  |
| 7W2B                                        | A-L    | 0.25 | 0.29 | 0.12   | 0.10 | 0.47 |
| 7W2C                                        | A-L    | 0.24 | 0.31 | 0.13   | 0.12 | 0.49 |
| 7W2D                                        | A-L    | 0.21 | 0.29 | 0.13   | 0.11 | 0.45 |
| 7W2E                                        | A-L    | 0.16 | 0.15 | 0.04   | 0.07 | 0.22 |
| 7W2F                                        | A-L    | 0.18 | 0.18 | 0.04   | 0.07 | 0.25 |
| 7W2G                                        | A-L    | 0.15 | 0.15 | 0.03   | 0.06 | 0.22 |
| 7W2H                                        | A-X    | 0.15 | 0.15 | 0.03   | 0.06 | 0.21 |

| Intra-structure comparison, RMSD all atoms |        |      |      |        |      |      |
|--------------------------------------------|--------|------|------|--------|------|------|
| PDB ID                                     | Chains | Med  | Ave  | St Dev | Min  | Max  |
| 7W2B                                       | A-L    | 0.64 | 0.63 | 0.14   | 0.29 | 0.87 |
| 7W2C                                       | A-L    | 0.54 | 0.59 | 0.23   | 0.16 | 0.86 |
| 7W2D                                       | A-L    | 0.52 | 0.57 | 0.26   | 0.16 | 0.84 |
| 7W2E                                       | A-L    | 0.49 | 0.43 | 0.13   | 0.15 | 0.56 |
| 7W2F                                       | A-L    | 0.52 | 0.52 | 0.07   | 0.22 | 0.61 |
| 7W2G                                       | A-L    | 0.43 | 0.42 | 0.06   | 0.23 | 0.54 |
| 7W2H                                       | A-X    | 0.21 | 0.21 | 0.04   | 0.08 | 0.33 |

**Supplementary Figure S1.** Root-mean-square deviation, calculated on the protein backbone of the whole trimer and of each monomer (MA, MB, and MC) with respect to the starting structure, as function of simulation time.

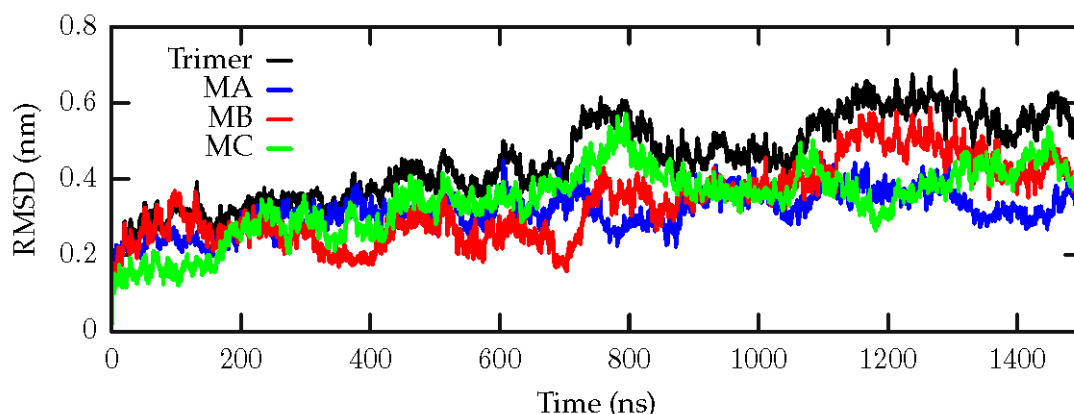

**Supplementary Figure S2.** Number of hydrogen bonds present in each monomer (MA, MB, and MC) as a function of the simulation time.

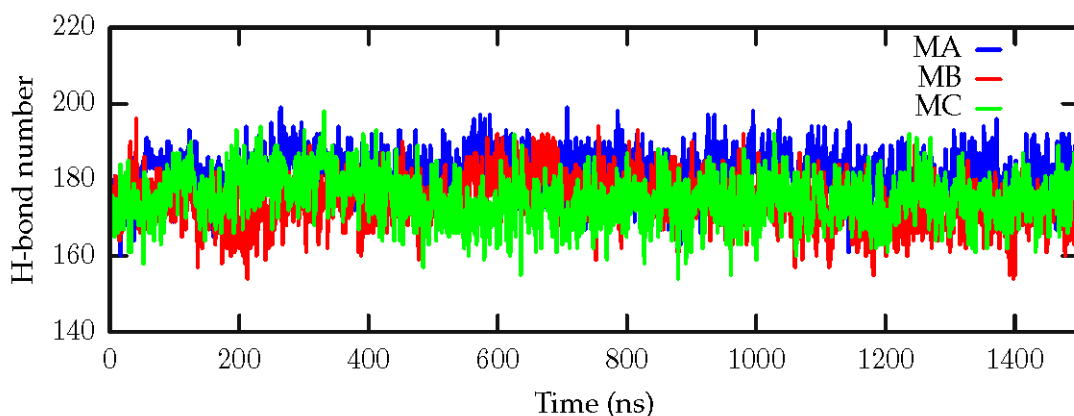

**Supplementary Figure S3.** Root-mean-square fluctuations calculated on the protein backbone of each monomer (MA, MB, and MC) averaged on the last 500 ns of MD simulation. The regions highlighted with orange boxes correspond to the portions of the two  $\beta$ -strands including residues E123 ( $\beta$ 5) and R175 ( $\beta$ 10).

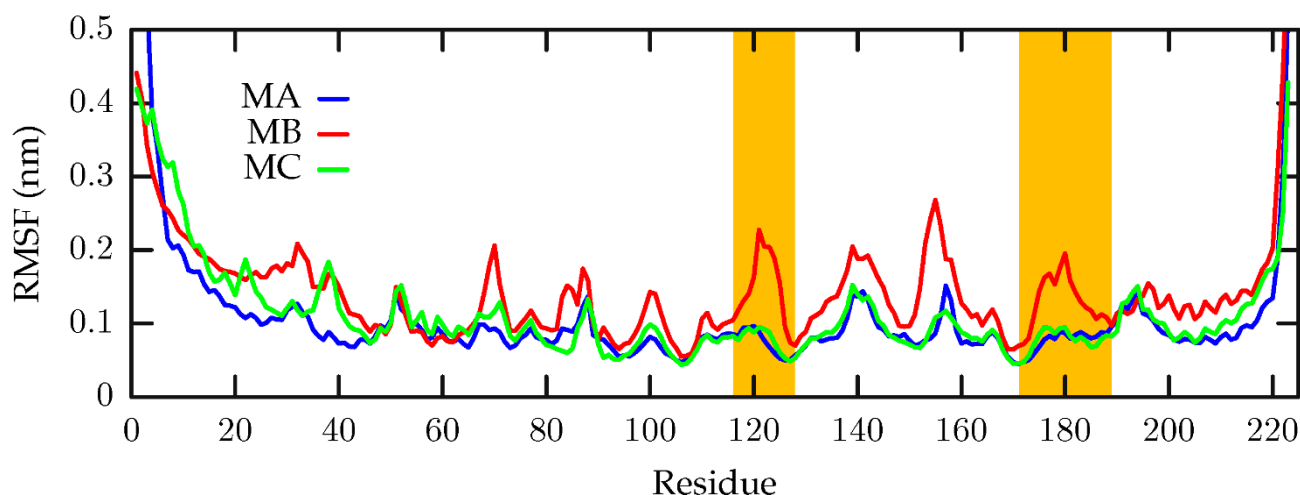

**Supplementary Figure S4.** Calculated energy of ligand binding to *Hs* $\sigma$ 1-R structure in coordinate file 5HK1.

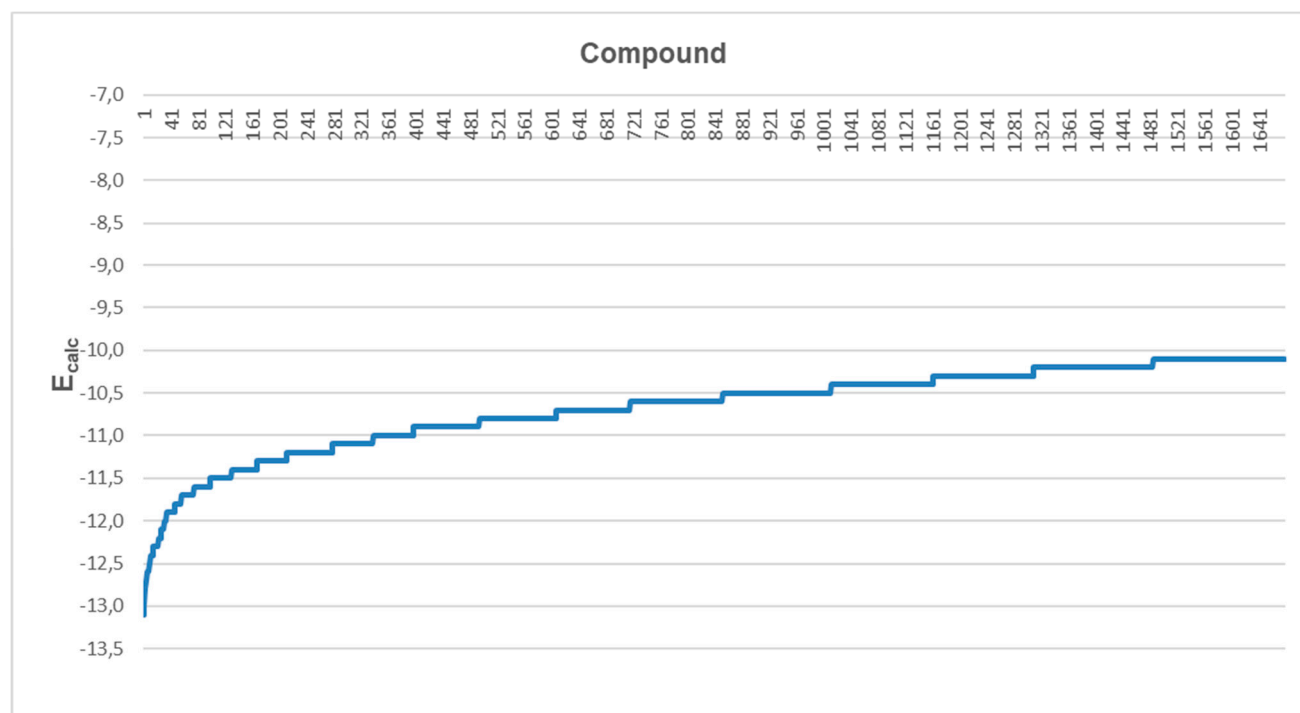

**Supplementary Figure S5.** Calculated energy of ligand binding to *Hs* $\sigma$ 1-R structure in coordinate file 6DK1.

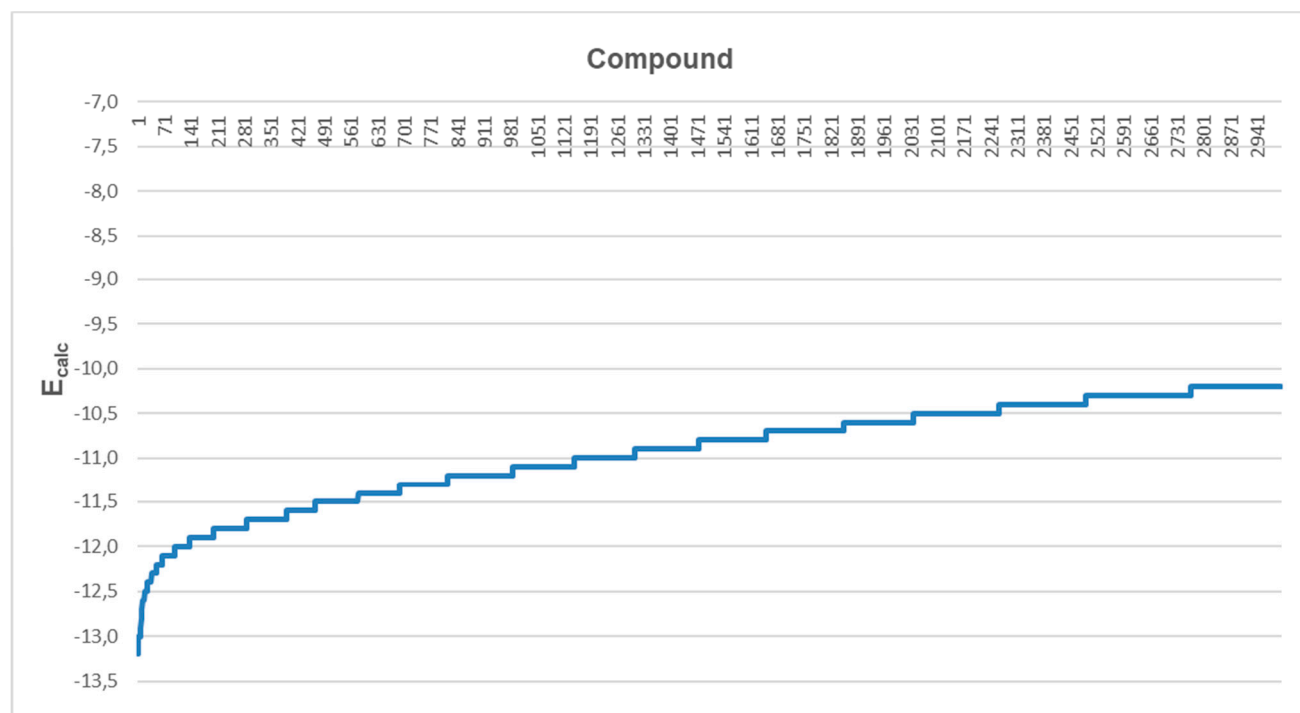

**Supplementary Figure S6.** Comparison between the calculated energy of ligand binding to *Hs*1-R structures in coordinate files 5HK1 and 6DK1.

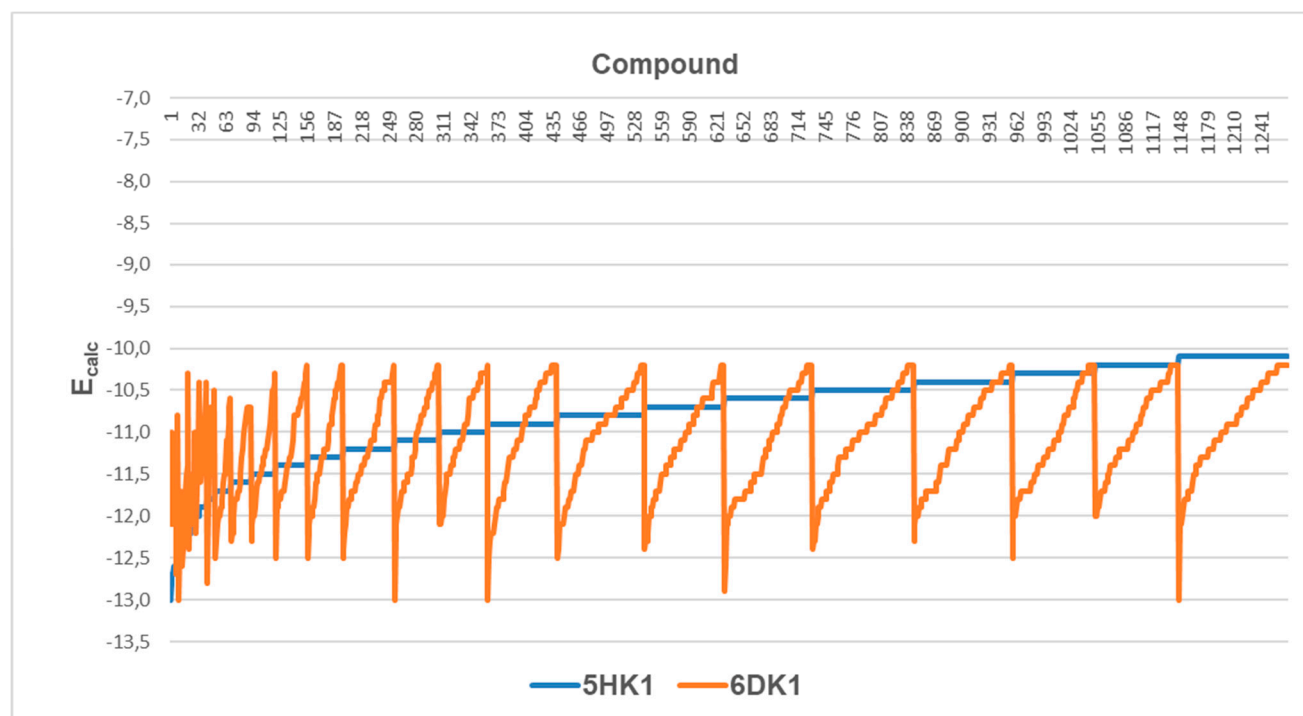

**Supplementary Figure S7.** Calculated energy of ligand binding to yeast ERG2 molecular model.

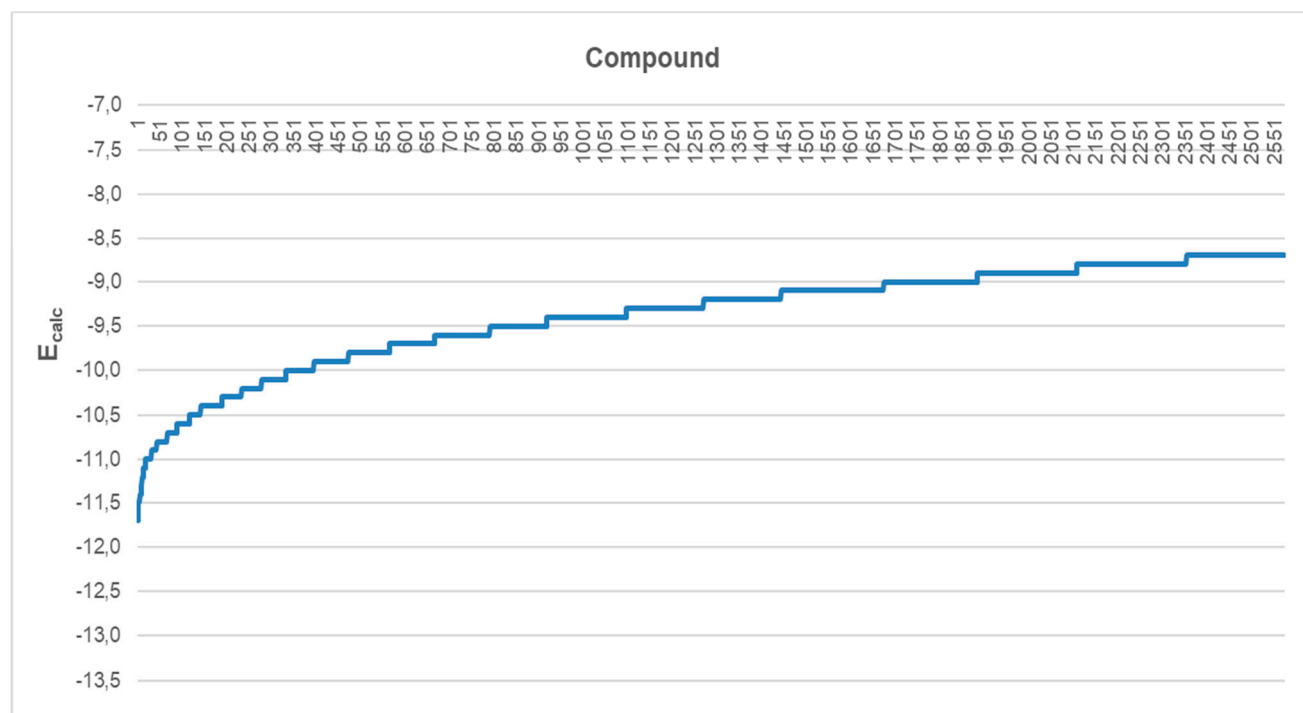

**Supplementary Figure S8.** Calculated energy of ligand binding to  $X/\sigma 1$ -R structure in coordinate file 7W2B.

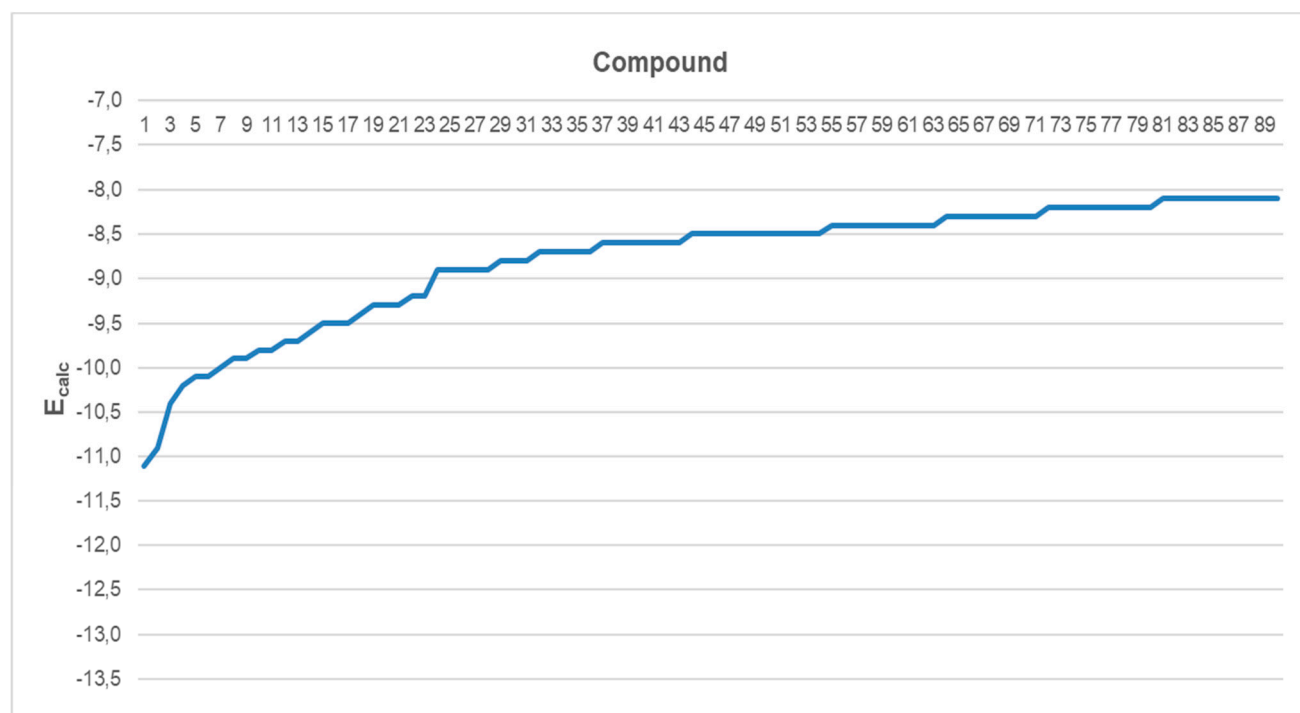

**Supplementary Figure S9.** Calculated energy of ligand binding to  $X/\sigma 1$ -R structure in coordinate file 7W2E.

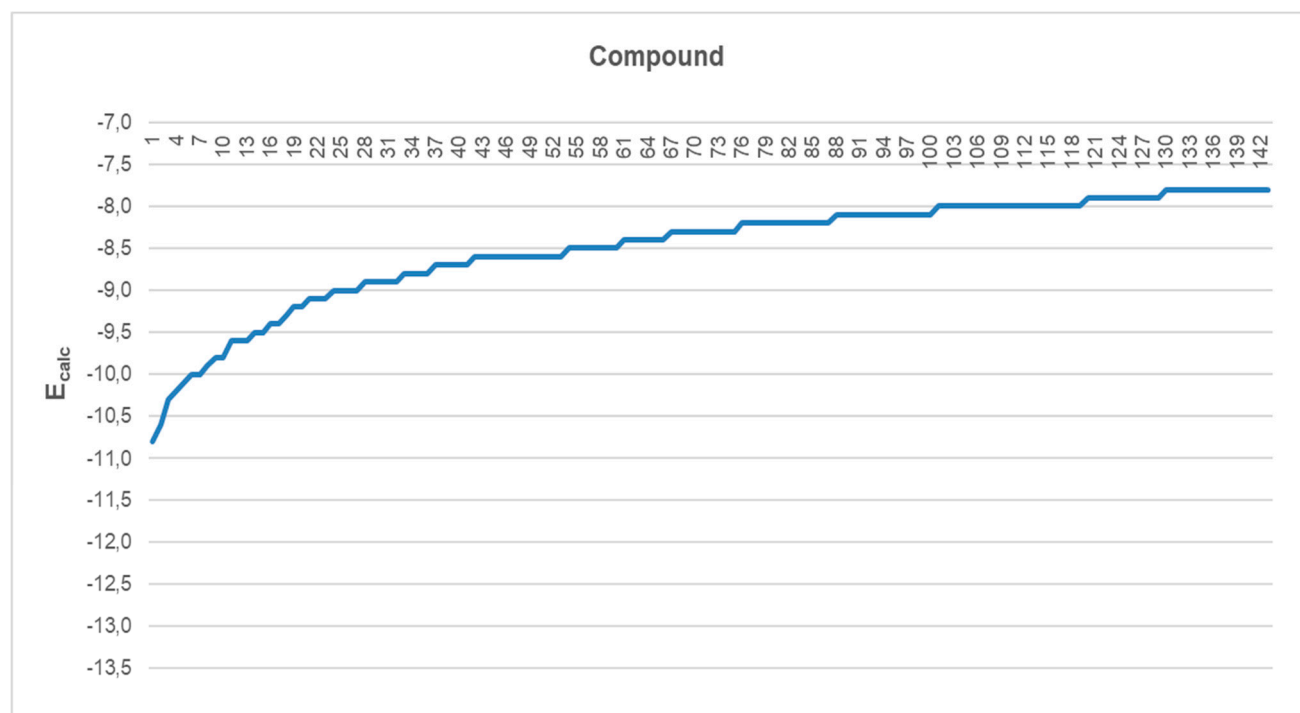

**Supplementary Figure S10.** Comparison between the calculated energy of ligand binding to X/σ1-R structures in coordinate files 7W2B and 7W2E.

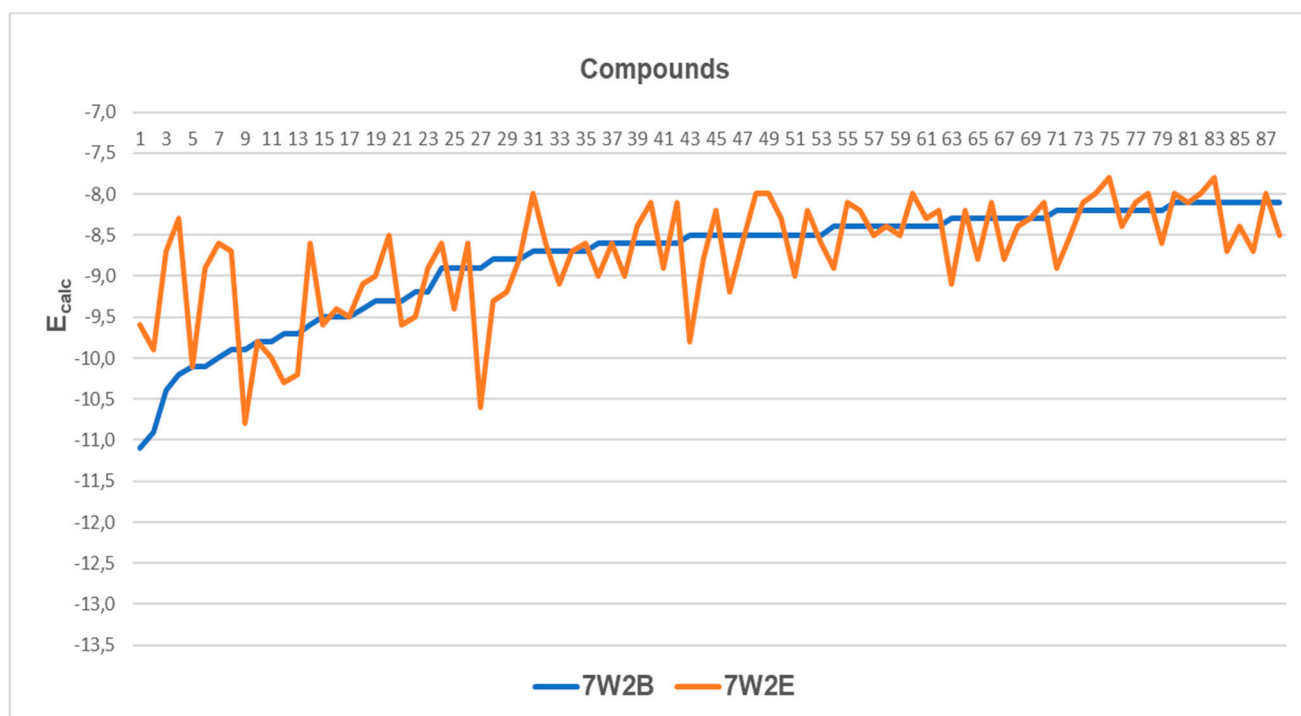

**Supplementary Figure S11.** Location of tryptophane residues in the 3D structure of *Hs*σ1-R in coordinate file 5HK1\_C with respect to the ligand binding site. The protein main-chain is shown as ribbon and colored green. Side-chains of tryptophane residues are shown as sticks and colored by atom type: N, blue; C, white for the two residues in the proximity of the ligand binding site and orange for the others. The PD144418 ligand in complex with the protein is shown as sticks and colored by atom type: N, blue; O, red; C, yellow.

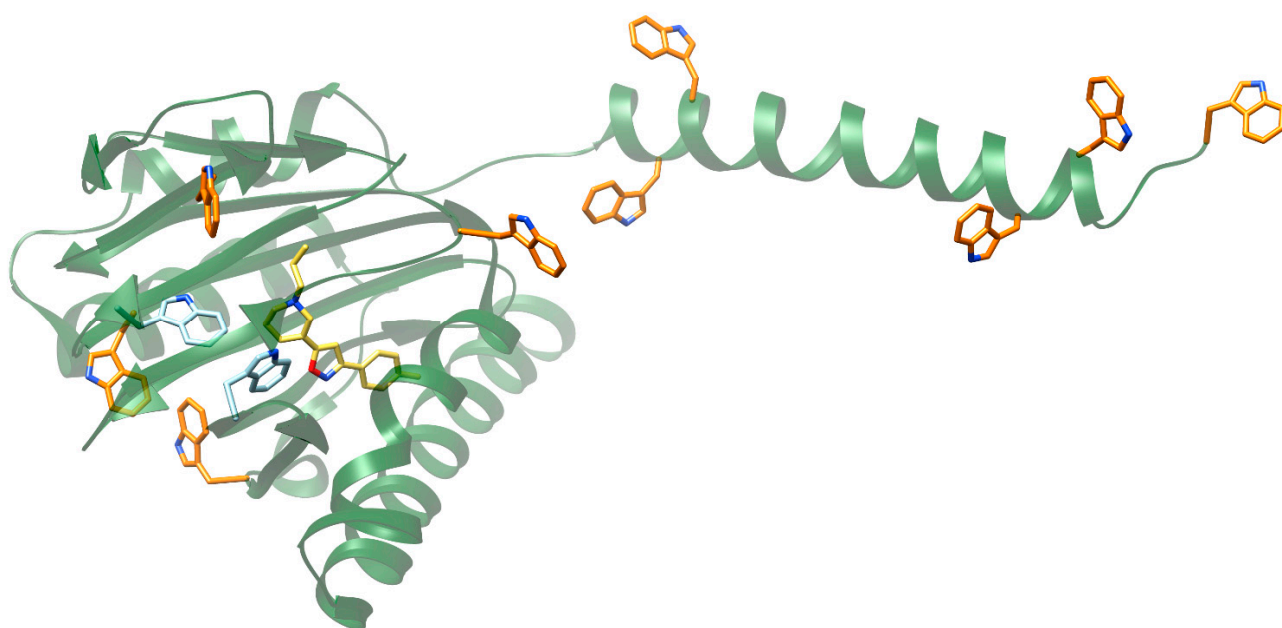



**Supplementary Figure S12. (A)** Calibration of the Superdex 200 size exclusion chromatography column. The x and y axes report the ratio between elution volume ( $V_e$ ) and dead volume ( $V_0$ ), and the logarithm of the molecular weight ( $\log[MW]$ ), respectively. The name and molecular weight of the proteins used to build the calibration curve are indicated. **(B)** Analytical size exclusion of purified *Hs* $\sigma$ 1R in LMNG/CHS detergent buffer on a Superdex 200 column. The x and y axes report the retention time and the absorbance at 280 nm, respectively. We obtained a peak at 13.9 min with a flow rate of 0.75 ml/min ( $V_0 = 8,07$  ml).

**A**

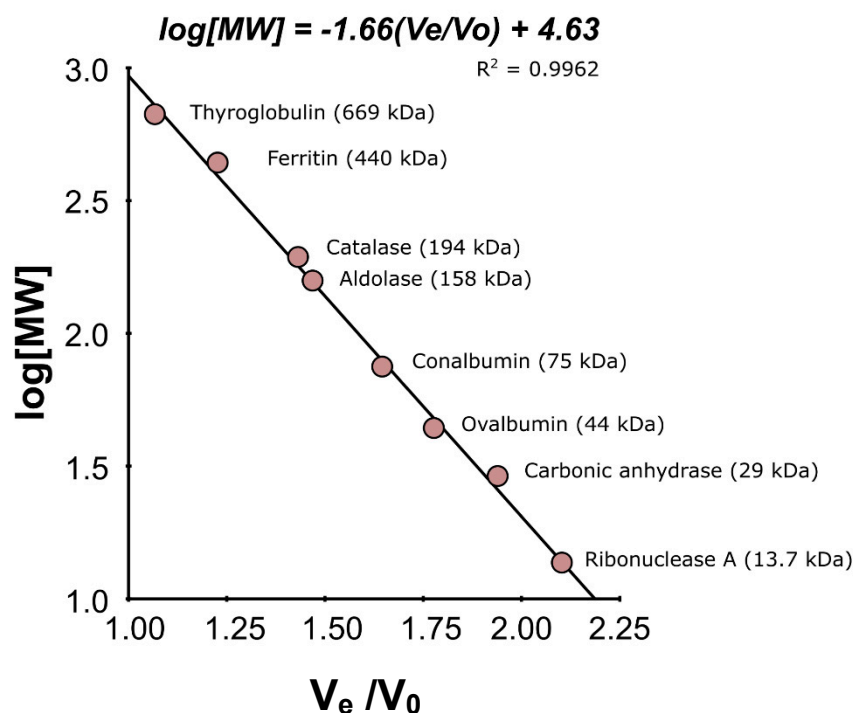

**B**

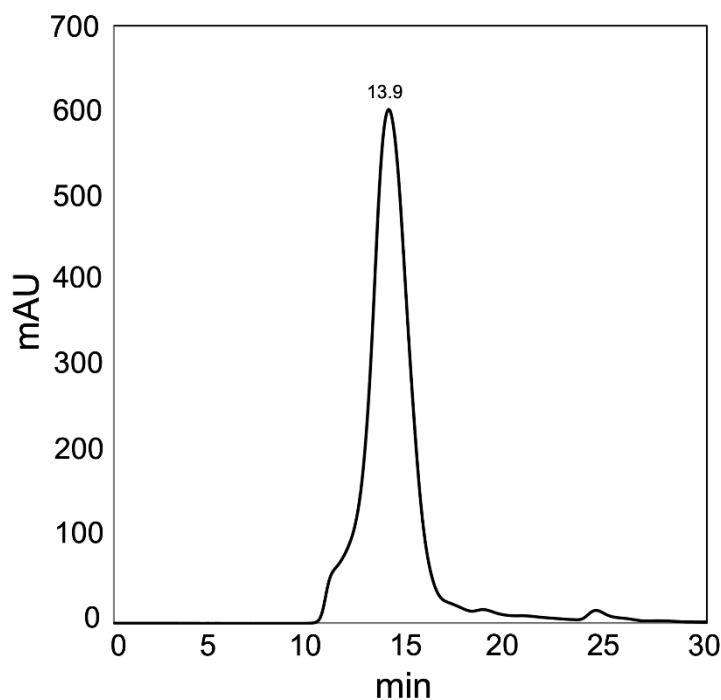

Supplement: s1 [file s1]
