# Supplementary material for: Investigation of the Entry Pathway and Molecular Nature of σ1 Receptor Ligands
Source: Int J Mol Sci. 2023 Mar 28;24(7):6367. doi: 10.3390/ijms24076367 (PMC10094450; doi:10.3390/ijms24076367)
Supplement: Supplementary file 1 [file ijms-24-06367-s001.zip]

Archive with 8 entries (8 files):
- Sigma1R_Supplementaries.pdf
- Supplementary-Table-S1_VS-5HK1.xlsx
- Supplementary-Table-S2_VS-6DK1.xlsx
- Supplementary-Table-S3_VS-5HK1-6DK1.xlsx
- Supplementary-Table-S4_VS-ERG2.xlsx
- Supplementary-Table-S6_VS-7W2B.xlsx
- Supplementary-Table-S7_VS-7W2E.xlsx
- Supplementary-Table-S8_VS-7W2B-7W2E.xlsx
