# Supplementary material for: Investigation of the Entry Pathway and Molecular Nature of σ1 Receptor Ligands
Source: Int J Mol Sci. 2023 Mar 28;24(7):6367. doi: 10.3390/ijms24076367 (PMC10094450; doi:10.3390/ijms24076367)
Supplement: Supplementary file 1 [file ijms-24-06367-s001.zip › Supplementary-Table-S1_VS-5HK1.xlsx]

## Sheet: 5HK1
	Database ID	Compound name	Category	Ecalc	HB	CL	Contacts				World_Not_FDA	Metab	FDA	ErgP	Sterols	Agonists-Antagonists	CholP	Sterol_Lipids	Steroids	Androgens	DeltaL	Estrogens
1	ZINC000000577115	Xaliproden	World_NOT_FDA	-13.1	0	0	64				0	0	0	0	0	0	0	0	0	0	0	0
2	ZINC000001727527	Norsanguinarine	Metab	-13	0	0	50				0	0	0	0	0	0	0	0	0	0	0	0
3	ZINC000001554274	Rilpivirine	FDA	-12.8	1	0	62
4	LMST01031015	ergosta-5,7,22,24(28)-tetraen-3beta-ol	Erg, Sterols	-12.7	0	1	77
5	LMST01160007	Minabeolide-6	Sterols	-12.7	0	1	80
6	ZINC000003881345	EstradiolBenzoate	World_NOT_FDA	-12.6	0	1	73
7	ZINC000000538312	Risperidone	FDA	-12.6	0	0	72
8	ZINC000011616882	Axitinib(cis)	FDA	-12.6	2	0	70
9	ZINC000014880001	Dutasteride	World_NOT_FDA	-12.5	0	4	100
10	ZINC000043195321	Capmatinib	World_NOT_FDA	-12.5	1	1	69
11	LMST01130063	BufogargarizinD	Sterols	-12.4	0	0	72
12	LMST01160002	Minabeolide-1	Sterols	-12.4	0	0	77
13	LMST01160005	Minabeolide-4	Sterols	-12.4	0	1	79
14	ZINC000008214421	Lufenuron	World_NOT_FDA	-12.4	2	0	58
15	LMST01160004	Minabeolide-3	Sterols	-12.3	0	1	78
16	LMST01160023	ExodeconolideF	Sterols	-12.3	0	1	87
17	ZINC000003821234	4-[3-(1,4-diazepan-1-ylcarbonyl)-4-fluorobenzyl]phthalazin-1(2H)-one	World_NOT_FDA	-12.3	0	1	64
18	ZINC000013444037	Tasosartan	World_NOT_FDA	-12.3	0	1	84
19	ZINC000017653974	Lufenuron	World_NOT_FDA	-12.3	2	0	62
20	ZINC000003984116	Quinacridone	Metab	-12.3	0	0	40
21	ZINC000004027981	Conferone	Metab	-12.3	1	1	74
22	ZINC000006716957	Nilotinib	FDA	-12.3	2	1	125
23	LMST01110011	23,24-dihydro-5alpha-calystanol	Sterols	-12.2	0	0	90
24	LMST01160000	Withanolideskeleton	Sterols	-12.2	0	0	90
25	ZINC000001481956	Paliperidone	FDA	-12.2	0	0	84
26	ZINC000004214700	Paliperidone	FDA	-12.2	0	0	73
27	LMST01030093	Ergosterol	Erg, Sterols	-12.1	0	0	79
28	ZINC000003876078	Estradiol	World_NOT_FDA	-12.1	1	0	83
29	ZINC000003881613	Nandrolonephenpropionate	World_NOT_FDA	-12.1	0	0	86
30	ZINC000014727602	IsoangustoneA	Metab	-12.1	0	0	73
31	ZINC000005752185	Clobetasone	World_NOT_FDA	-12	0	1	75
32	ZINC000001542113	Vilazadone(*)	FDA	-12	2	2	87
33	ZINC000253597112	Sesamolin	Metab	-12	0	0	41
34	ZINC000261499150	5-Dehydroavenasterol	Metab	-12	0	4	89
35	LMST01031046	Peridinosterol	Erg, Sterols	-11.9	0	1	86
36	LMST01031114	4α-methyl-ergosta-6,8(14)-dien-3β-ol	Erg, Sterols	-11.9	0	1	83
37	ZINC000000001567	Indoramin	World_NOT_FDA	-11.9	1	0	49
38	ZINC000000006990	SarizotanHydrochloride	World_NOT_FDA	-11.9	1	0	55
39	ZINC000000021067	Sarizotan	World_NOT_FDA	-11.9	0	0	59
40	ZINC000001844627	Talniflumate	World_NOT_FDA	-11.9	0	0	59
41	ZINC000003873781	Metergoline	World_NOT_FDA	-11.9	0	0	68
42	ZINC000008219876	5-Cholestene	Metab	-11.9	0	0	79
43	ZINC000008220551	solanidine	Metab	-11.9	0	3	86
44	ZINC000014210642	Azilsartanmedoxomil	FDA	-11.9	2	2	135
45	ZINC000019796080	Droperidolo	FDA	-11.9	0	0	58
46	ZINC000058581064	Dolutegravir	FDA	-11.9	1	0	59
47	CID_9829526	Siramesine	Agonists-Antagonists	-11.8	1	2	89
48	LMST01030142	4α,23,24-Trimethyl-5α-cholest-17(20)-en-3β-ol	Erg, Sterols	-11.8	1	2	85
49	LMST01030145	23,24-Dimethylcholest-22-en-3β-ol	Erg, Sterols	-11.8	0	2	97
50	LMST01040166	24-ethylcholesta-5,7,23Z-trien-3β-ol	Sterols	-11.8	0	1	95
51	ZINC000009232411	Benperidol	World_NOT_FDA	-11.8	0	0	63
52	ZINC000002019691	Benzo[a]pyrene-7,8-Diol	Metab	-11.8	0	0	45
53	ZINC000002019692	Benzo[a]pyrene-7,8-Diol	Metab	-11.8	0	0	46
54	ZINC000002019693	Benzo[a]pyrene-7,8-Diol	Metab	-11.8	0	0	44
55	ZINC000002019694	Benzo[a]pyrene-7,8-Diol	Metab	-11.8	0	0	43
56	LMST01010355	4alpha-OH-7-DHC	Chol, Sterols	-11.7	0	1	85
57	LMST01031027	22-dihydroergosterol	Erg, Sterols	-11.7	0	2	80
58	LMST01031058	Sarcosterol	Erg, Sterols	-11.7	0	4	91
59	LMST01031158	CraterolA	Erg, Sterols	-11.7	0	2	81
60	LMST03030003	1,25-Dihydroxylumisterol(3)	Sterol_Lipids	-11.7	1	1	92
61	LMST01040241	(5alpha,24(28)Z)-Stigmast-24(28)-en-3-one	Sterols	-11.7	0	1	88
62	LMST01040244	5alpha-poriferastane	Sterols	-11.7	0	1	91
63	LMST01040262	poriferastane	Sterols	-11.7	0	0	91
64	ZINC000000538415	Tamibarotene	World_NOT_FDA	-11.7	2	1	64
65	ZINC000000601275	Talniflumate	World_NOT_FDA	-11.7	0	0	57
66	ZINC000000898237	Rutaecarpine	World_NOT_FDA	-11.7	0	0	39
67	ZINC000026892643	Clobetasol	World_NOT_FDA	-11.7	0	1	79
68	ZINC000102249909	Doxercalciferol	World_NOT_FDA	-11.7	0	0	94
69	ZINC000001548097	Fanapt	FDA	-11.7	1	0	74
70	ZINC000001552174	cilostazol	FDA	-11.7	0	0	74
71	ZINC000001886965	Mahanimbine	Metab	-11.7	0	0	60
72	ZINC000003820029	linagliptin	FDA	-11.7	0	1	104
73	ZINC000004097812	Avenasterol	Metab	-11.7	0	1	83
74	ZINC000261499149	5-Dehydroavenasterol	Metab	-11.7	0	3	88
75	LMST01030102	Ergostanol	Erg, Sterols	-11.6	0	0	93
76	LMST03010008	26,26,26,27,27,27-hexafluoro-25-hydroxyvitaminD2	Sterol_Lipids	-11.6	0	3	107
77	LMST03020135	(5Z)-4,4-difluorovitaminD3/(5Z)-4,4-difluorocholecalciferol	Sterol_Lipids	-11.6	0	2	98
78	LMST01040120	7-dehydrositosterol	Sterols	-11.6	0	0	84
79	LMST01080100	AsparacemosoneD	Sterols	-11.6	0	3	70
80	LMST01110001	Calysterol	Sterols	-11.6	0	2	90
81	LMST01160034	ParaminabeolideA	Sterols	-11.6	1	1	81
82	ZINC000000537877	Ketanserin	World_NOT_FDA	-11.6	0	0	59
83	ZINC000003809191	Abiraterone	World_NOT_FDA	-11.6	2	3	82
84	ZINC000004081771	Testolactone	World_NOT_FDA	-11.6	0	0	49
85	ZINC000033902346	Mga	World_NOT_FDA	-11.6	0	0	59
86	ZINC000000968444	Mahanimbine	Metab	-11.6	0	0	53
87	ZINC000001634347	(r)-Mahanine	Metab	-11.6	0	0	51
88	ZINC000002101853	Conferone	Metab	-11.6	0	3	86
89	ZINC000002146627	Conferone	Metab	-11.6	0	3	82
90	ZINC000002187519	Conferone	Metab	-11.6	0	3	84
91	ZINC000004097814	Fucosterin	Metab	-11.6	0	1	90
92	ZINC000006094187	Sesamolin	Metab	-11.6	0	0	44
93	ZINC000011681534	Nebivolol	FDA	-11.6	1	0	71
94	ZINC000014690464	Sesamolinol	Metab	-11.6	0	0	39
95	ZINC000033830297	Conferone	Metab	-11.6	0	3	84
96	ZINC000052716421	flibanserin	FDA	-11.6	0	0	52
97	ZINC000253597111	Sesamolin	Metab	-11.6	0	0	39
98	ZINC000253597113	Sesamolin	Metab	-11.6	0	0	39
99	LMST01010058	3,5-cholestadien-7-one	Chol, Sterols	-11.5	0	1	89
100	LMST01010313	19-norcholestenone	Chol, Sterols	-11.5	0	1	75
101	LMST01030123	-	Erg, Sterols	-11.5	0	0	90
102	LMST01030147	-	Erg, Sterols	-11.5	0	2	103
103	LMST01031018	pregna-4,9(11)-diene-3,20-dione	Erg, Sterols	-11.5	0	0	55
104	LMST01031022	5-campestenone	Erg, Sterols	-11.5	0	2	91
105	LMST01031045	Dinosterone	Erg, Sterols	-11.5	0	3	96
106	LMST01031117	-	Erg, Sterols	-11.5	0	0	89
107	LMST02020061	-	Steroids, Androgens, Sterol_Lipids	-11.5	0	0	52
108	LMST02020084	testolactone	Steroids, DeltaL, Androgens, Sterol_Lipids	-11.5	0	0	48
109	LMST02030177	megestrol	Steroids, Estrogens, Sterol_Lipids	-11.5	0	0	62
110	LMST03020331	6-methylvitaminD3/6-methylcholecalciferol	Sterol_Lipids	-11.5	0	2	101
111	LMST01040157	Fucostanol	Sterols	-11.5	0	1	92
112	LMST01110009	Hebesterol	Sterols	-11.5	0	1	89
113	LMST01110010	Petrostanol	Sterols	-11.5	0	2	98
114	LMST01130001	Bufalin	Sterols	-11.5	0	3	73
115	LMST01150007	Solanidine	Sterols	-11.5	0	3	75
116	LMST01150016	20-epi-Verazine	Sterols	-11.5	0	2	78
117	ZINC000001532099	Asana	Metab	-11.5	0	0	73
118	ZINC000001550499	Cinacalcet	FDA	-11.5	0	0	60
119	ZINC000001615142	Girinimbine	Metab	-11.5	0	0	41
120	ZINC000001650575	(-)-Cryptotanshinone	Metab	-11.5	0	0	46
121	ZINC000002109876	Cryptotanshinone	Metab	-11.5	0	0	46
122	ZINC000003860715	Derrin	Metab	-11.5	0	1	57
123	ZINC000004028456	Conferone	Metab	-11.5	0	3	83
124	ZINC000004213946	Nebivolol	FDA	-11.5	0	0	69
125	ZINC000004641374	Doxercalciferol	FDA	-11.5	1	2	99
126	ZINC000004655035	E-Tocopherol	Metab	-11.5	1	0	82
127	ZINC000005844792	Nebivolol	FDA	-11.5	1	0	69
128	ZINC000006206699	(+)-Mahanimbicine	Metab	-11.5	0	0	62
129	ZINC000013449409	6-O-Desmethyldonepezil	Metab	-11.5	0	1	68
130	LMST01030000	Ergostaneskeleton	Erg, Sterols	-11.4	0	0	86
131	LMST01030001	Campestaneskeleton	Erg, Sterols	-11.4	0	0	90
132	LMST01030138	-	Erg, Sterols	-11.4	0	2	88
133	LMST01030144	-	Erg, Sterols	-11.4	0	2	94
134	LMST02020119	PenicildioneA	Steroids, Androgens, Sterol_Lipids	-11.4	0	0	58
135	LMST02030147	Delta(1)-progesterone	Steroids, DeltaL, Estrogens, Sterol_Lipids	-11.4	0	0	57
136	LMST02030163	16,17-didehydroprogesterone	Steroids, DeltaL, Estrogens, Sterol_Lipids	-11.4	0	1	53
137	LMST02030150	pregn-4-en-3-one	Steroids, Estrogens, Sterol_Lipids	-11.4	0	0	54
138	LMST02030168	11beta-hydroxyprogesterone	Steroids, Estrogens, Sterol_Lipids	-11.4	0	0	62
139	LMST02030239	PenicildioneB	Steroids, Estrogens, Sterol_Lipids	-11.4	0	0	71
140	LMST03010016	tachysterol2	Sterol_Lipids	-11.4	0	1	87
141	LMST03010039	-	Sterol_Lipids	-11.4	1	2	119
142	LMST04010455	3,12-diketo-4,6-petromyzonene-24-sulfate	Sterol_Lipids	-11.4	0	0	74
143	LMST01040165	Axinyssasterol	Sterols	-11.4	0	2	97
144	LMST01040168	(3beta,24S,24'S)-fucosterolepoxide	Sterols	-11.4	0	1	95
145	LMST01040255	fucosterol	Sterols	-11.4	0	1	92
146	LMST01040268	CraterolB	Sterols	-11.4	0	2	89
147	LMST01040276	4alpha,14alpha,23S-trimethyl-sitosterol	Sterols	-11.4	0	3	98
148	LMST01050018	24-isopropenyl-22E-dehydrocholesterol	Sterols	-11.4	0	2	95
149	LMST01100011	cycloeucalenol	Sterols	-11.4	1	3	87
150	LMST01110005	(24S)-isocalysterol	Sterols	-11.4	0	3	90
151	LMST01130000	Bufanolideskeleton	Sterols	-11.4	0	1	73
152	ZINC000000968277	Troglitazone	World_NOT_FDA	-11.4	0	1	72
153	ZINC000001482077	Gliquidone	World_NOT_FDA	-11.4	1	3	122
154	ZINC000004097376	Winstrol	World_NOT_FDA	-11.4	0	1	61
155	ZINC000004216862	Meprednisone	World_NOT_FDA	-11.4	0	0	68
156	ZINC000009330879	Rebamipide	World_NOT_FDA	-11.4	1	1	56
157	ZINC000113149554	Netarsudil	World_NOT_FDA	-11.4	2	2	95
158	ZINC000000899892	Phaseolin	Metab	-11.4	0	1	49
159	ZINC000000899909	Sojagol	Metab	-11.4	0	0	52
160	ZINC000005845767	(r)-Mahanine	Metab	-11.4	0	0	65
161	ZINC000006206700	(+)-Mahanimbicine	Metab	-11.4	0	0	63
162	ZINC000013449412	6-O-Desmethyldonepezil	Metab	-11.4	0	1	61
163	ZINC000040430143	Olaparib	FDA	-11.4	0	2	93
164	ZINC000057509131	-	Metab	-11.4	1	0	73
165	ZINC000094566092	Doxazosin	FDA	-11.4	1	2	107
166	ZINC000100771793	(-)-FarnesiferolC	Metab	-11.4	0	0	71
167	ZINC000100771795	(-)-FarnesiferolC	Metab	-11.4	0	0	69
168	LMST01010059	4,6-cholestadienone	Chol, Sterols	-11.3	0	0	75
169	LMST01010245	Cholesterylacetate	Chol, Sterols	-11.3	1	2	87
170	LMST01010356	24S-OH-7-DHC	Chol, Sterols	-11.3	0	1	84
171	LMST01030116	-	Erg, Sterols	-11.3	0	0	86
172	LMST01031051	4alpha-demethyldinosterol	Erg, Sterols	-11.3	0	4	101
173	LMST02020074	Testosteronecypionate	Steroids, Androgens, Sterol_Lipids	-11.3	1	1	94
174	LMST02030242	ClathroidA	Steroids, Estrogens, Sterol_Lipids	-11.3	0	1	88
175	LMST05010017	16alpha,17beta-Estriol3-(beta-D-glucuronide)	Steroids, Sterol_Lipids	-11.3	0	1	84
176	LMST03010009	26,26,26,27,27,27-hexafluoro-25-hydroxyvitaminD2	Sterol_Lipids	-11.3	0	3	107
177	LMST03010036	(6R)-6,19-epidioxy-6,19-dihydrovitaminD2/(6R)-6,19-epidioxy-6,19-dihydroergocalciferol	Sterol_Lipids	-11.3	0	1	88
178	LMST03020139	(5Z)-4,4-difluoro-1alpha--hydroxyvitaminD3/(5Z)-4,4-difluoro-1alpha--hydroxycholecalciferol	Sterol_Lipids	-11.3	0	2	101
179	LMST03020201	(5E,10E)-19-fluorovitaminD3/(5E,10E)-19-fluorocholecalciferol	Sterol_Lipids	-11.3	0	2	102
180	LMST03020224	isotachysterol3	Sterol_Lipids	-11.3	1	0	88
181	LMST03050002	ProvitaminD6	Sterol_Lipids	-11.3	0	2	83
182	LMST01040135	-	Sterols	-11.3	0	1	99
183	LMST01040172	24-allenyl-cholesterol	Sterols	-11.3	0	2	88
184	LMST01040245	5alpha-stigmastane	Sterols	-11.3	0	0	92
185	LMST01040264	stigmastane	Sterols	-11.3	0	0	93
186	LMST01090000	Furopirostaneskeleton	Sterols	-11.3	0	3	91
187	LMST01100001	24-methylene-cycloartanol	Sterols	-11.3	0	5	103
188	LMST01110012	23,24-dihydro-calysterol	Sterols	-11.3	0	2	89
189	LMST01130020	19-oxo-bufalin	Sterols	-11.3	1	3	82
190	LMST01130026	Gamabufotalin	Sterols	-11.3	0	3	79
191	LMST01160001	15beta-HydroxynicandrinB	Sterols	-11.3	0	2	93
192	ZINC000000968278	Troglitazone	World_NOT_FDA	-11.3	0	3	77
193	ZINC000003831401	Pyrvinium	World_NOT_FDA	-11.3	0	0	66
194	ZINC000012504271	Atovaquone	World_NOT_FDA	-11.3	0	1	70
195	ZINC000013449465	5-O-Desmethyldonepezil	World_NOT_FDA	-11.3	0	0	68
196	ZINC000253616932	11-deoxycorticosteronepivalate	World_NOT_FDA	-11.3	0	1	79
197	ZINC000000538483	Trazodone	FDA	-11.3	0	0	46
198	ZINC000000538550	Ziprasidone	FDA	-11.3	0	1	70
199	ZINC000001634344	Isomahanine	Metab	-11.3	0	0	74
200	ZINC000003927200	Yaz	FDA	-11.3	0	3	76
201	ZINC000004084618	Ergosterol	Metab	-11.3	0	2	81
202	ZINC000004097967	Kamassine	Metab	-11.3	0	0	52
203	ZINC000004293351	Irenolone	Metab	-11.3	0	0	42
204	ZINC000006050190	(-)-Phaseollin	Metab	-11.3	0	0	53
205	ZINC000006050191	(-)-Phaseollin	Metab	-11.3	0	1	55
206	ZINC000014455484	2-hydroxy-4-(4-methoxyphenyl)-1h-phenalen-1-one	Metab	-11.3	0	0	46
207	ZINC000014767731	E-Tocopherol	Metab	-11.3	1	0	96
208	ZINC000034806477	Xtandi	FDA	-11.3	1	2	79
209	ZINC000035801098	Indacaterol	FDA	-11.3	0	0	76
210	ZINC000095620870	UrolithinB3-O-Glucuronide	Metab	-11.3	0	0	59
211	ZINC000229763735	(+)-Zeylenol	Metab	-11.3	0	0	59
212	LMST01010257	-	Chol, Sterols	-11.2	0	2	102
213	LMST01010301	22,23-epoxycampesterol	Chol, Sterols	-11.2	0	2	84
214	LMST01010304	(24E)-24,26-dimethyldesmosterol	Chol, Sterols	-11.2	0	3	89
215	LMST01010305	(24Z)-24,26-dimethyldesmosterol	Chol, Sterols	-11.2	0	0	92
216	LMST01010316	Patinosterol	Chol, Sterols	-11.2	0	0	85
217	LMST01010346	Marthasterone	Chol, Sterols	-11.2	0	0	89
218	LMST01010351	4,6-cholestadienol	Chol, Sterols	-11.2	0	1	82
219	LMST01010400	Micaceol	Chol, Sterols	-11.2	0	1	78
220	LMST01030095	Fecosterol	Erg, Sterols	-11.2	0	2	76
221	LMST01030103	Campestanol	Erg, Sterols	-11.2	0	1	93
222	LMST01030112	-	Erg, Sterols	-11.2	0	4	97
223	LMST01030115	Episterol	Erg, Sterols	-11.2	0	2	82
224	LMST01030119	-	Erg, Sterols	-11.2	0	2	91
225	LMST01030122	-	Erg, Sterols	-11.2	0	0	84
226	LMST01030137	-	Erg, Sterols	-11.2	0	1	98
227	LMST01031023	Dehydroergosterol	Erg, Sterols	-11.2	0	2	84
228	LMST01031036	25(26)-dehydroaplysterol	Erg, Sterols	-11.2	0	2	92
229	LMST01031105	Chabrosterol	Erg, Sterols	-11.2	0	3	96
230	LMST01031120	3-epi-6-deoxocathasterone	Erg, Sterols	-11.2	0	1	95
231	LMST02020007	Androstenedione	Steroids, Androgens, Sterol_Lipids	-11.2	0	0	49
232	LMST02020065	-	Steroids, Androgens, Sterol_Lipids	-11.2	0	1	54
233	LMST02020066	11beta-Hydroxyandrostenedione	Steroids, Androgens, Sterol_Lipids	-11.2	0	0	52
234	LMST05010011	Estrone3-glucuronide	Steroids, Sterol_Lipids	-11.2	0	1	83
235	LMST03010067	7-Dehydrocholesterol-3-sulfateester	Sterol_Lipids	-11.2	1	1	93
236	LMST03020307	dihydrotachysterol3/(5E)-(10S)-10,19-dihydrovitaminD3/(5E)-(10S)-10,19-dihydrocholecalciferol	Sterol_Lipids	-11.2	0	1	95
237	LMST03020310	1alpha-hydroxy-22-(3-hydroxyphenyl)-23,24,25,26,27-pentanorvitaminD3/1alpha-hydroxy-22-(3-hydroxyphenyl)-23,24,25,26,27-pentanorcholecalciferol	Sterol_Lipids	-11.2	0	0	97
238	LMST03020390	1alpha-hydroxy-22-(3-methylphenyl)-23,24,25,26,27-pentanorvitaminD3/1alpha-hydroxy-22-(3-methylphenyl)-23,24,25,26,27-pentanorcholecalciferol	Sterol_Lipids	-11.2	0	2	102
239	LMST03040004	1-HydroxyvitaminD5	Sterol_Lipids	-11.2	0	0	109
240	LMST04030220	(25S)-dafachronicacid	Sterol_Lipids	-11.2	0	0	85
241	LMST01040125	-	Sterols	-11.2	0	2	92
242	LMST01040257	halosterolB	Sterols	-11.2	0	1	93
243	LMST01050013	24-Isopropyl-22E-dehydrocholesterol	Sterols	-11.2	0	3	91
244	LMST01060005	-	Sterols	-11.2	0	3	88
245	LMST01060010	(22R,23R)-methylenecholesterol	Sterols	-11.2	0	2	91
246	LMST01080032	Isorhodeasapogenin	Sterols	-11.2	0	2	81
247	LMST01110015	-	Sterols	-11.2	0	0	84
248	ZINC000000537804	Glisoxepide	World_NOT_FDA	-11.2	1	0	101
249	ZINC000000607726	Bemetizide	World_NOT_FDA	-11.2	0	0	55
250	ZINC000000968279	Troglitazone	World_NOT_FDA	-11.2	0	3	91
251	ZINC000001530605		World_NOT_FDA	-11.2	2	0	83
252	ZINC000003881421	Boldione	World_NOT_FDA	-11.2	0	0	50
253	ZINC000004084618		World_NOT_FDA	-11.2	0	2	79
254	ZINC000004212953	Dihydrotachysterol	World_NOT_FDA	-11.2	1	1	95
255	ZINC000004213363	Fluprednidene	World_NOT_FDA	-11.2	0	0	83
256	ZINC000004216332	Esiclene	World_NOT_FDA	-11.2	1	0	65
257	ZINC000019632822	Fipexide	World_NOT_FDA	-11.2	0	0	55
258	ZINC000067664978	O-DeethylatedCandesartan	World_NOT_FDA	-11.2	0	0	91
259	ZINC000095618767	FlurbiprofenGlucuronide	World_NOT_FDA	-11.2	1	0	73
260	ZINC000000602632	Intelence	FDA	-11.2	1	1	85
261	ZINC000000643203	OchratoxinB	Metab	-11.2	2	0	62
262	ZINC000000901095	Glyceollin	Metab	-11.2	0	1	52
263	ZINC000001489478	Sitagliptin	FDA	-11.2	1	0	52
264	ZINC000001537184	Miltirone	Metab	-11.2	0	1	56
265	ZINC000003644943	LicoriisoflavanA	Metab	-11.2	0	1	77
266	ZINC000003791929	Gamma-Tocotrienol	Metab	-11.2	0	0	90
267	ZINC000003816514	Rolapitant	FDA	-11.2	0	1	116
268	ZINC000003823475	Eletriptan	FDA	-11.2	1	0	82
269	ZINC000003875383	Cholesterol	Metab	-11.2	0	0	80
270	ZINC000004098720	HispaglabridinA	Metab	-11.2	0	2	73
271	ZINC000004098742	Phaseolinisoflavan	Metab	-11.2	0	0	49
272	ZINC000004655034	Zeta1-Tocopherol	Metab	-11.2	0	0	100
273	ZINC000005260598	OchratoxinB	Metab	-11.2	1	0	65
274	ZINC000005260601	OchratoxinB	Metab	-11.2	1	0	60
275	ZINC000005260602	OchratoxinB	Metab	-11.2	2	0	64
276	ZINC000014727570	LicoriisoflavanA	Metab	-11.2	0	1	78
277	ZINC000040899447	Erivedge	FDA	-11.2	0	1	65
278	ZINC000049952219	5alpha-Cholestane	Metab	-11.2	0	2	88
279	LMST01010167	3-dehydro-4-methylzymosterol	Chol, Sterols	-11.1	0	4	88
280	LMST01010174	5alpha-cholestanone	Chol, Sterols	-11.1	0	0	75
281	LMST01010254	-	Chol, Sterols	-11.1	0	1	72
282	LMST01010349	1-(5alpha)-cholestenone	Chol, Sterols	-11.1	0	0	81
283	LMST04030217	(25R)-Delta(4)-dafachronicacid	DeltaL, Sterol_Lipids	-11.1	0	1	79
284	LMST01030096	22,23-dihydrobrassicasterol	Erg, Sterols	-11.1	0	2	87
285	LMST01030105	Fungisterol	Erg, Sterols	-11.1	0	2	91
286	LMST01031002	Ergosta-5,7,22E,24(28)-tetraenol	Erg, Sterols	-11.1	0	2	95
287	LMST01031028	Codisterol	Erg, Sterols	-11.1	0	3	86
288	LMST01031057	-	Erg, Sterols	-11.1	0	1	81
289	LMST01031113	NebrosteroidM	Erg, Sterols	-11.1	1	1	90
290	LMST01031116	-	Erg, Sterols	-11.1	0	1	91
291	LMST01031155	Talarosterone	Erg, Sterols	-11.1	0	2	82
292	LMST02020120	11-ketoTestosterone	Steroids, Androgens, Sterol_Lipids	-11.1	0	0	55
293	LMST05010024	6-dehydrotestosterone17-glucosiduronicacid	Steroids, Androgens, Sterol_Lipids	-11.1	0	1	81
294	LMST05010040	4-Hydroxyandrostenedioneglucuronide	Steroids, Androgens, Sterol_Lipids	-11.1	2	4	98
295	LMST02020083	3,17-dioxoandrost-4-en-19-al	Steroids, DeltaL, Androgens, Sterol_Lipids	-11.1	1	0	53
296	LMST02030159	progesterone	Steroids, DeltaL, Estrogens, Sterol_Lipids	-11.1	0	0	59
297	LMST02030103	Fludrocortisone	Steroids, Estrogens, Sterol_Lipids	-11.1	0	0	71
298	LMST02030160	9,11alpha-epoxypregn-4-ene-3,20-dione	Steroids, Estrogens, Sterol_Lipids	-11.1	0	0	63
299	LMST02030161	17alpha-hydroxyprogesterone	Steroids, Estrogens, Sterol_Lipids	-11.1	0	0	66
300	LMST03010014	(5E)-vitaminD2/5,6-trans-vitaminD2/(5E)-ergocalciferol/(5E)-ercalciol	Sterol_Lipids	-11.1	0	3	110
301	LMST03010017	isotachysterol2	Sterol_Lipids	-11.1	0	1	84
302	LMST03020220	(5E)-vitaminD3/(5E)-cholecalciferol/(5E)-calciol	Sterol_Lipids	-11.1	0	2	98
303	LMST03020658	3-Fluoro-9,10-secocholesta-5,7,10(19)-triene	Sterol_Lipids	-11.1	0	1	85
304	LMST01040141	-	Sterols	-11.1	0	2	93
305	LMST01040263	Stigmast-4-ene-3,6-dione	Sterols	-11.1	0	1	91
306	LMST01050020	-	Sterols	-11.1	0	2	92
307	LMST01120000	Cardanolideskeleton	Sterols	-11.1	0	2	74
308	LMST01130066	BufogargarizinC	Sterols	-11.1	0	2	60
309	LMST01150006	Verazine	Sterols	-11.1	0	1	80
310	LMST01160009	Minabeolide-8	Sterols	-11.1	0	5	95
311	LMST01040154	Delta7-Avenasterol	Sterols, DeltaL	-11.1	0	2	91
312	ZINC000000001624	(-)-Lobeline	World_NOT_FDA	-11.1	1	0	63
313	ZINC000000598390	Azilsartan	World_NOT_FDA	-11.1	0	0	95
314	ZINC000001530604		World_NOT_FDA	-11.1	1	0	72
315	ZINC000002526765	Cypermethrin	World_NOT_FDA	-11.1	0	2	81
316	ZINC000002563085	Estradiol	World_NOT_FDA	-11.1	2	0	61
317	ZINC000003798603		World_NOT_FDA	-11.1	1	0	64
318	ZINC000006092801	Haloperidol1,2,3,6-Tetrahydropyridine	World_NOT_FDA	-11.1	0	0	47
319	ZINC000008618002		World_NOT_FDA	-11.1	0	4	116
320	ZINC000029391220		World_NOT_FDA	-11.1	0	1	102
321	ZINC000000000706	Sanguinarine	Metab	-11.1	0	0	43
322	ZINC000001485935	isavuconazole	FDA	-11.1	1	0	73
323	ZINC000001653270	orientanolb	Metab	-11.1	0	0	51
324	ZINC000001653271	orientanolb	Metab	-11.1	0	0	52
325	ZINC000001858795	OrientanolB	Metab	-11.1	0	0	52
326	ZINC000003255767		Metab	-11.1	1	0	82
327	ZINC000003875484	androxy	FDA	-11.1	0	0	60
328	ZINC000004073895	4,6-Cholestadien-3-One	Metab	-11.1	0	3	88
329	ZINC000004096611		Metab	-11.1	0	2	78
330	ZINC000004175630	Orap	FDA	-11.1	0	3	87
331	ZINC000014712188	Sorgolactone	Metab	-11.1	2	1	66
332	ZINC000014762761	GancaoninO	Metab	-11.1	0	0	40
333	ZINC000064033452	Lumacaftor	FDA	-11.1	1	3	84
334	ZINC000095636507	Dihydrobrassicasterol	Metab	-11.1	0	1	86
335	ZINC000118912450	Oxymetholone	FDA	-11.1	0	0	63
336	ZINC000253388218	(+)-Zeylenol	Metab	-11.1	1	0	59
337	ZINC000253609253		Metab	-11.1	0	2	97
338	LMST01010098	Epi-cholestanol	Chol, Sterols	-11	0	1	85
339	LMST01010170	zymosterolintermediate1c	Chol, Sterols	-11	0	1	91
340	LMST01010297	24-ketocholestanol	Chol, Sterols	-11	0	0	90
341	LMST01030098	Brassicasterol	Erg, Sterols	-11	0	3	88
342	LMST01030104	-	Erg, Sterols	-11	0	3	91
343	LMST01030124	6-Deoxocathasterone	Erg, Sterols	-11	0	3	92
344	LMST01030135	5-dehydroepisterol	Erg, Sterols	-11	0	1	81
345	LMST01031034	24(28)-dehydroaplysterol	Erg, Sterols	-11	0	1	94
346	LMST01031041	Stelliferasterol	Erg, Sterols	-11	0	2	91
347	LMST01031176	Ergosta-4,6,8(14),22E-tetraen-3-one	Erg, Sterols	-11	0	4	83
348	LMST02020057	Testosteroneacetate	Steroids, Androgens, Sterol_Lipids	-11	0	0	64
349	LMST02030184	11alpha-hydroxyprogesterone	Steroids, Estrogens, Sterol_Lipids	-11	0	1	63
350	LMST05010018	17beta-Estradiol3-sulfate-17-(beta-D-glucuronide)	Steroids, Sterol_Lipids	-11	1	2	90
351	LMST05010026	17alpha-estradiol3-glucosiduronicacid	Steroids, Sterol_Lipids	-11	0	1	95
352	LMST05050028	17-beta-estradiolglucuronide	Steroids, Sterol_Lipids	-11	0	1	84
353	LMST03020143	(5Z)-4,4-difluoro-1alpha,25-dihydroxyvitaminD3/(5Z)-4,4-difluoro-1alpha,25-dihydroxycholecalciferol	Sterol_Lipids	-11	0	1	109
354	LMST03020217	1alpha-hydroxy-3-deoxyvitaminD3/1alpha-hydroxy-3-deoxycholecalciferol	Sterol_Lipids	-11	1	0	97
355	LMST03020233	(5E)-1alpha-hydroxyvitaminD3/(5E)-1alpha-hydroxycholecalciferol	Sterol_Lipids	-11	0	2	102
356	LMST03020333	6-methylprevitaminD3/6-methylprecholecalciferol	Sterol_Lipids	-11	0	3	98
357	LMST03020567	1beta,25-dihydroxy-3-deoxy-19-nor-22-oxavitaminD3/1beta,25-dihydroxy-3-deoxy-19-nor-22-oxacholecalciferol	Sterol_Lipids	-11	0	1	82
358	LMST03020616	2alpha-Fluoro-19-nor-22-oxa-1alpha,25-dihydroxyvitaminD3	Sterol_Lipids	-11	0	1	100
359	LMST03020618	3-DeoxyvitaminD3	Sterol_Lipids	-11	0	1	86
360	LMST03060001	VitaminD7	Sterol_Lipids	-11	0	1	97
361	LMST01040159	28-methylxestosterol	Sterols	-11	0	4	101
362	LMST01040162	28-Isofucostanol	Sterols	-11	0	1	96
363	LMST01040266	Stigmastanol	Sterols	-11	0	2	98
364	LMST01050014	24-Isopropyl-cholesterol	Sterols	-11	0	5	102
365	LMST01050016	25-Methyl-24-isopropenyl-22E-dehydrocholesterol	Sterols	-11	0	2	104
366	LMST01050019	24-Isopropenylcholesterol	Sterols	-11	0	2	96
367	LMST01060013	-	Sterols	-11	0	6	99
368	LMST01100002	cycloartanol	Sterols	-11	0	4	101
369	LMST01100012	-	Sterols	-11	0	1	100
370	LMST01110006	Petrosterol	Sterols	-11	0	2	91
371	LMST01130002	Scillirosidin	Sterols	-11	0	5	80
372	LMST01130067	-	Sterols	-11	0	2	79
373	ZINC000004654793		World_NOT_FDA	-11	1	3	96
374	ZINC000013828184	Perospirone	World_NOT_FDA	-11	0	0	80
375	ZINC000019132424	E-Guggulsterone	World_NOT_FDA	-11	0	1	48
376	ZINC000022061277	4'-Hydroxytrazodone	World_NOT_FDA	-11	0	0	60
377	ZINC000095619124	3-Cis-HydroxycyclohexylGlyburide	World_NOT_FDA	-11	3	1	121
378	ZINC000000537805	diabeta	FDA	-11	1	4	111
379	ZINC000000538453	tiazuril	Metab	-11	0	0	40
380	ZINC000000601229	azelastine	FDA	-11	0	1	72
381	ZINC000000900910	xi-8-acetonyldihydrosanguinarine	Metab	-11	0	0	64
382	ZINC000001597393	neorautone	Metab	-11	0	0	44
383	ZINC000001858796	OrientanolB	Metab	-11	0	1	53
384	ZINC000001999441		FDA	-11	1	0	60
385	ZINC000004097304		FDA	-11	0	0	71
386	ZINC000005158963	licoisoflavone	Metab	-11	0	0	61
387	ZINC000005761341	campestanol	Metab	-11	0	3	87
388	ZINC000005854565	licoricidin	Metab	-11	1	0	70
389	ZINC000006569100	campestrol	Metab	-11	0	1	84
390	ZINC000011666642	prunetrin	Metab	-11	0	0	71
391	ZINC000013507165		Metab	-11	0	1	82
392	ZINC000014727569		Metab	-11	0	0	73
393	ZINC000014825436	umbelliferonefarnesylether	Metab	-11	0	0	74
394	ZINC000030729704		Metab	-11	0	1	85
395	ZINC000043206370	niraparib	FDA	-11	2	0	51
396	ZINC000095919483		Metab	-11	0	0	56
397	ZINC000256430521		Metab	-11	0	2	105
398	LMST01010243	-	Chol, Sterols	-10.9	0	1	82
399	LMST01010289	-	Chol, Sterols	-10.9	0	3	82
400	LMST01010446	3beta,4beta-dihydroxycholest-8(9)-en-23-one	Chol, Sterols	-10.9	0	2	83
401	LMST01010015	Cholestenone	Chol, Sterols, DeltaL	-10.9	0	0	82
402	LMST01010248	3-ketocholesterol	Chol, Sterols, DeltaL	-10.9	0	0	78
403	LMST04030218	(25R)-Delta(7)-dafachronicacid	DeltaL, Sterol_Lipids	-10.9	0	1	83
404	LMST04030221	(25S)-Delta(4)-dafachronicacid	DeltaL, Sterol_Lipids	-10.9	0	1	78
405	LMST04030223	(25S)-delta(1,7)-dafachronicacid	DeltaL, Sterol_Lipids	-10.9	0	1	82
406	LMST01031219	EhrensteroidE	Erg, Sterol_Lipids	-10.9	1	4	104
407	LMST01031222	Sarcophytosterol	Erg, Sterol_Lipids	-10.9	0	2	98
408	LMST01030100	-	Erg, Sterols	-10.9	0	3	96
409	LMST01031019	4alpha-Methylfecosterol	Erg, Sterols	-10.9	0	3	95
410	LMST01031021	Dinosterol	Erg, Sterols	-10.9	1	3	90
411	LMST01031025	-	Erg, Sterols	-10.9	0	2	87
412	LMST01031048	-	Erg, Sterols	-10.9	0	1	82
413	GMJ		PDB	-10.9	0	0	67
414	LMST02020002	Testosterone	Steroids, Androgens, Sterol_Lipids	-10.9	1	0	56
415	LMST02020018	Dehydrotestosterone	Steroids, Androgens, Sterol_Lipids	-10.9	1	0	57
416	LMST02020025	Fluoxymesterone	Steroids, Androgens, Sterol_Lipids	-10.9	0	0	60
417	LMST02020114	9,17-hydroxy-androsta-1,4-dien-3-one	Steroids, Androgens, Sterol_Lipids	-10.9	2	0	59
418	LMST02030149	(20R)-17,20-dihydroxypregn-4-en-3-one	Steroids, Estrogens, Sterol_Lipids	-10.9	0	1	63
419	LMST02030151	17,20-dihydroxypregn-4-en-3-one	Steroids, Estrogens, Sterol_Lipids	-10.9	1	1	60
420	LMST02030152	20-hydroxypregn-4-en-3-one	Steroids, Estrogens, Sterol_Lipids	-10.9	0	0	57
421	LMST02030153	(20R)-20-hydroxypregn-4-en-3-one	Steroids, Estrogens, Sterol_Lipids	-10.9	0	0	56
422	LMST02030209	-	Steroids, Estrogens, Sterol_Lipids	-10.9	1	1	65
423	LMST02030243	ClathroidB	Steroids, Estrogens, Sterol_Lipids	-10.9	0	0	60
424	LMST02010007	-	Steroids, Sterol_Lipids	-10.9	0	0	45
425	LMST02010020	-	Steroids, Sterol_Lipids	-10.9	0	0	52
426	LMST03010056	dihydrotachysterol2/(5E)-(10S)-10,19-dihydrovitaminD2/(5E)-(10S)-10,19-dihydroergocalciferol	Sterol_Lipids	-10.9	0	3	98
427	LMST03020080	26,26,26,27,27,27-hexafluoro-1alpha,25-dihydroxy-23,23,24,24-tetradehydrovitaminD3/26,26,26,27,27,27-hexafluoro-1alpha,25-dihydroxy-23,23,24,24-tetradehydrocholecalciferol	Sterol_Lipids	-10.9	0	3	96
428	LMST03020124	(23R,25S)-1alpha,25-dihydroxyvitaminD326,23-lactone/(23R,25S)-1alpha,25-dihydroxycholecalciferol26,23-lactone	Sterol_Lipids	-10.9	2	2	95
429	LMST03020147	24,25-didehydrovitaminD3/24,25-didehydrocholecalciferol	Sterol_Lipids	-10.9	0	2	86
430	LMST03020214	(5E,10Z)-19-fluoro-1alpha,25-dihydroxyvitaminD3/(5E,10Z)-19-fluoro-1alpha,25-dihydroxycholecalciferol	Sterol_Lipids	-10.9	0	0	106
431	LMST03020225	(5E)-isovitaminD3/(5E)-isocholecalciferol	Sterol_Lipids	-10.9	0	2	85
432	LMST03020444	(17E)-1alpha,25-dihydroxy-26,27-dimethyl-17,20,22,22,23,23-hexadehydro-24a-homovitaminD3/(17E)-1alpha,25-dihydroxy-26,27-dimethyl-17,20,22,22,23,23-hexadehydro-24a-homocholecalciferol	Sterol_Lipids	-10.9	1	2	105
433	LMST03040002	VitaminD5	Sterol_Lipids	-10.9	0	3	105
434	LMST03060002	ProvitaminD7	Sterol_Lipids	-10.9	0	1	77
435	LMST04010324	-	Sterol_Lipids	-10.9	0	0	78
436	LMST04030124	-	Sterol_Lipids	-10.9	0	1	90
437	LMST04030163	paricalcitol	Sterol_Lipids	-10.9	1	2	98
438	LMST01040131	-	Sterols	-10.9	0	2	89
439	LMST01040137	-	Sterols	-10.9	0	2	94
440	LMST01040176	-	Sterols	-10.9	0	3	88
441	LMST01040191	NorselicacidB	Sterols	-10.9	1	2	88
442	LMST01050011	Ophirasterol	Sterols	-10.9	0	2	106
443	LMST01080000	Spirostaneskeleton	Sterols	-10.9	0	4	78
444	LMST01080002	(25R)-5beta-spirostan-1beta,3alpha-diol	Sterols	-10.9	0	1	86
445	LMST01080005	(25R)-5beta-spirostan-3beta-ol	Sterols	-10.9	0	1	79
446	LMST01110008	24,26-cyclocholesterol	Sterols	-10.9	0	3	82
447	LMST01120001	Digitoxigenin	Sterols	-10.9	1	3	76
448	LMST01130014	11alpha-hydroxytelocinobufagin	Sterols	-10.9	0	3	86
449	LMST01130025	Telocinobufagin	Sterols	-10.9	2	3	83
450	LMST01130068	BufogargarizinC	Sterols	-10.9	0	5	66
451	LMST01160019	WithanolideA	Sterols	-10.9	0	3	95
452	LMST01040145	Isofucosterol	Sterols, DeltaL	-10.9	0	2	91
453	ZINC000000001246	Dapiprazole	World_NOT_FDA	-10.9	0	0	56
454	ZINC000000968276	Troglitazone	World_NOT_FDA	-10.9	0	1	74
455	ZINC000002013188	Phenothrin	World_NOT_FDA	-10.9	0	1	58
456	ZINC000003872177	Cypermethrin	World_NOT_FDA	-10.9	0	0	71
457	ZINC000003881556	Estradiol	World_NOT_FDA	-10.9	1	1	65
458	ZINC000004083557	Corlin	World_NOT_FDA	-10.9	0	0	68
459	ZINC000004097468	Testosterone	World_NOT_FDA	-10.9	0	1	98
460	ZINC000006117750	Desmethylazelastine	World_NOT_FDA	-10.9	1	1	82
461	ZINC000013449409	6-O-Desmethyldonepezil	World_NOT_FDA	-10.9	0	0	49
462	ZINC000077292462	EtodolacAcylGlucuronide	World_NOT_FDA	-10.9	0	1	82
463	ZINC000095618768	FlurbiprofenGlucuronide	World_NOT_FDA	-10.9	1	1	76
464	ZINC000000189892	7-acetoxy-2-methylisoflavone	Metab	-10.9	2	0	58
465	ZINC000000537795	glipizide	FDA	-10.9	1	0	105
466	ZINC000000899902	psoralidin	Metab	-10.9	0	0	58
467	ZINC000000900914	xi-8-acetonyldihydrosanguinarine	Metab	-10.9	0	0	62
468	ZINC000001530975	butenafine	FDA	-10.9	0	0	50
469	ZINC000001531878		Metab	-10.9	1	0	96
470	ZINC000001557161	trp-trp	Metab	-10.9	1	0	76
471	ZINC000001575028	lambertine	Metab	-10.9	0	0	47
472	ZINC000001658458	artocarpesin	Metab	-10.9	1	0	47
473	ZINC000002065942		Metab	-10.9	1	1	80
474	ZINC000002563650	isoglycycoumarin	Metab	-10.9	1	1	66
475	ZINC000003784182	differin	FDA	-10.9	0	3	76
476	ZINC000003816287	axitinib	FDA	-10.9	2	3	73
477	ZINC000003875357	prednisone	FDA	-10.9	0	0	66
478	ZINC000003921872	dovonex	FDA	-10.9	1	2	102
479	ZINC000003932831	avodart	FDA	-10.9	0	4	91
480	ZINC000003945984	vexol	FDA	-10.9	0	2	82
481	ZINC000003964325	sunitinib	FDA	-10.9	1	0	75
482	ZINC000004096020	5b-cholestan-3-one	Metab	-10.9	0	2	94
483	ZINC000004262223	zymostanol	Metab	-10.9	0	2	82
484	ZINC000005844788		FDA	-10.9	0	0	63
485	ZINC000005845755	isomahanine	Metab	-10.9	0	0	65
486	ZINC000008662732	prunetrin	Metab	-10.9	0	2	84
487	ZINC000014648318	gancaoninp	Metab	-10.9	2	0	57
488	ZINC000014658239	dehydropipernoline	Metab	-10.9	0	0	64
489	ZINC000034106859		Metab	-10.9	0	1	105
490	ZINC000035457583		Metab	-10.9	0	0	62
491	ZINC000067664978	o-deethylatedcandesartan	Metab	-10.9	0	0	85
492	ZINC000077287124	n-desmethyleletriptan	Metab	-10.9	1	0	81
493	ZINC000100412689		Metab	-10.9	0	0	45
494	ZINC000253604821		Metab	-10.9	0	0	61
495	LMST01010066	Zymosterol	Chol, Sterols	-10.8	0	2	79
496	LMST01010077	Dihydrocholesterol	Chol, Sterols	-10.8	0	0	80
497	LMST01010096	Zymostenol	Chol, Sterols	-10.8	0	2	79
498	LMST01010179	2,22,25-trideoxyecdysone	Chol, Sterols	-10.8	0	1	97
499	LMST01010182	2-deoxyecdysone	Chol, Sterols	-10.8	0	1	94
500	LMST01010187	25-deoxyecdysone	Chol, Sterols	-10.8	1	2	99
501	LMST01010291	19-norcholestanol	Chol, Sterols	-10.8	0	3	78
502	LMST01010299	24-keto-25dehydrocholesterol	Chol, Sterols	-10.8	0	1	78
503	LMST01010300	24-keto-25dehydrocholestanol	Chol, Sterols	-10.8	0	1	85
504	LMST01010365	Zymostenol-d7	Chol, Sterols	-10.8	0	2	78
505	LMST01010385	-	Chol, Sterols	-10.8	0	2	81
506	LMST04030222	(25S)-Delta(7)-dafachronicacid	DeltaL, Sterol_Lipids	-10.8	0	1	86
507	LMST01030099	Chalinasterol	Erg, Sterols	-10.8	0	3	82
508	LMST01030109	-	Erg, Sterols	-10.8	0	2	92
509	LMST01030125	3-Dehydro-6-deoxoteasterone	Erg, Sterols	-10.8	0	1	98
510	LMST01030139	-	Erg, Sterols	-10.8	0	2	98
511	LMST01031037	Mutasterol	Erg, Sterols	-10.8	0	2	94
512	LMST01031044	Ficisterol	Erg, Sterols	-10.8	0	2	89
513	LMST01031050	-	Erg, Sterols	-10.8	0	3	74
514	LMST01031053	24S-isopropenyl-cholesterol	Erg, Sterols	-10.8	0	3	91
515	LMST01031085	ConicasterolB	Erg, Sterols	-10.8	0	2	87
516	LMST01031020	Delta8,14-Sterol	Erg, Sterols, DeltaL	-10.8	0	4	87
517	LMST02020026	Formyldienolone	Steroids, Androgens, Sterol_Lipids	-10.8	0	1	64
518	LMST02030122	Fludrocortisoneacetate	Steroids, Estrogens, Sterol_Lipids	-10.8	0	0	80
519	LMST02030186	corticosterone	Steroids, Estrogens, Sterol_Lipids	-10.8	0	0	65
520	LMST02010039	Estradiolvalerate	Steroids, Sterol_Lipids	-10.8	1	1	70
521	LMST01060036	KlyflaccisteroidD	Sterol_Lipids	-10.8	0	3	99
522	LMST03010019	(5E)-isovitaminD2/(5E)-isoergocalciferol	Sterol_Lipids	-10.8	0	1	94
523	LMST03010069	Doxercalciferol	Sterol_Lipids	-10.8	0	1	105
524	LMST03020017	(5E)-(22R)-22-hydroxy-24,25,26,27-tetranorvitaminD3/(5E)-(22R)-22-hydroxy-24,25,26,27-tetranorcholecalciferol	Sterol_Lipids	-10.8	0	1	80
525	LMST03020076	1alpha,26,26,26,27,27,27-heptafluoro-25-hydroxy-16,17,23,23,24,24-hexadehydrovitaminD3/1alpha,26,26,26,27,27,27-heptafluoro-25-hydroxy-16,17,23,23,24,24-hexadehydrocholecalciferol	Sterol_Lipids	-10.8	0	3	87
526	LMST03020079	26,26,26,27,27,27-hexafluoro-25-hydroxy-23,23,24,24-tetradehydrovitaminD3/26,26,26,27,27,27-hexafluoro-25-hydroxy-23,23,24,24-tetradehydrocholecalciferol	Sterol_Lipids	-10.8	0	3	90
527	LMST03020081	(22E)-26,26,26,27,27,27-hexafluoro-25-hydroxy-22,23-didehydrovitaminD3/(22E)-26,26,26,27,27,27-hexafluoro-25-hydroxy-22,23-didehydrocholecalciferol	Sterol_Lipids	-10.8	0	3	101
528	LMST03020082	(22E)-26,26,26,27,27,27-hexafluoro-1alpha,25-dihydroxy-22,23-didehydrovitaminD3/(22E)-26,26,26,27,27,27-hexafluoro-1alpha,25-dihydroxy-22,23-didehydrocholecalciferol	Sterol_Lipids	-10.8	0	4	113
529	LMST03020083	(23E)-26,26,26,27,27,27-hexafluoro-1alpha,25-dihydroxy-23,24-didehydrovitaminD3/(23E)-26,26,26,27,27,27-hexafluoro-1alpha,25-dihydroxy-23,24-didehydrocholecalciferol	Sterol_Lipids	-10.8	0	2	96
530	LMST03020085	26,26,26,27,27,27-hexafluoro-1alphaa-hydroxyvitaminD3/26,26,26,27,27,27-hexafluoro-1alphaa-hydroxycholecalciferol	Sterol_Lipids	-10.8	0	3	99
531	LMST03020117	(23R,25S)-25-hydroxyvitaminD326,23-lactone/(23R,25S)-25-hydroxycholecalciferol26,23-lactone	Sterol_Lipids	-10.8	0	1	93
532	LMST03020154	1alpha,25-dihydroxy-9,11-didehydro-3-deoxyvitaminD3/1alpha,25-dihydroxy-9,11-didehydro-3-deoxycholecalciferol	Sterol_Lipids	-10.8	0	1	93
533	LMST03020221	(5E)-3-epivitaminD3/(5E)-3-epicholecalciferol	Sterol_Lipids	-10.8	0	0	94
534	LMST03020222	previtaminD3/precholecalciferol/(6Z)-tacalciol	Sterol_Lipids	-10.8	0	0	84
535	LMST03020223	tachysterol3	Sterol_Lipids	-10.8	1	2	89
536	LMST03020253	-	Sterol_Lipids	-10.8	1	1	108
537	LMST03020552	1alpha,25-dihydroxy-2-methylene-19-norvitaminD3/1alpha,25-dihydroxy-2-methylene-19-norcholecalciferol	Sterol_Lipids	-10.8	0	0	99
538	LMST03020557	1alpha,25-dihydroxy-2-methylene-19-nor-20-epivitaminD3/1alpha,25-dihydroxy-2-methylene-19-nor-20-epicholecalciferol	Sterol_Lipids	-10.8	0	1	95
539	LMST03020599	(23S)-1alpha-hydroxy-25,27-didehydrovitaminD326,23-lactone	Sterol_Lipids	-10.8	0	3	109
540	LMST03020678	22-HydroxyvitaminD3	Sterol_Lipids	-10.8	0	2	97
541	LMST03030001	VitaminD4	Sterol_Lipids	-10.8	0	2	96
542	LMST04030213	-	Sterol_Lipids	-10.8	0	2	81
543	LMST01040124	Clerosterol	Sterols	-10.8	0	4	98
544	LMST01040130	Poriferasterol	Sterols	-10.8	0	2	100
545	LMST01040132	-	Sterols	-10.8	0	1	93
546	LMST01040164	(25Z)-26-methylstrongylosterol	Sterols	-10.8	0	3	108
547	LMST01040181	TheonellasterolB	Sterols	-10.8	0	2	98
548	LMST01040193	geodisterol-O-sulfite	Sterols	-10.8	2	4	110
549	LMST01100000	9beta,19-cyclo-lanostaneskeleton	Sterols	-10.8	0	5	100
550	LMST01100004	-	Sterols	-10.8	0	4	101
551	LMST01110014	Glaucasterol	Sterols	-10.8	0	1	80
552	ZINC000000538174	Picotamide	World_NOT_FDA	-10.8	1	0	66
553	ZINC000001851132	Pemetrexed	World_NOT_FDA	-10.8	0	0	71
554	ZINC000001996306	Cypermethrin	World_NOT_FDA	-10.8	0	1	66
555	ZINC000002509755	O-Desmethylcarvedilol	World_NOT_FDA	-10.8	1	0	79
556	ZINC000003869855	Dicumarol	World_NOT_FDA	-10.8	0	1	47
557	ZINC000003874467	Nafamostat	World_NOT_FDA	-10.8	2	0	70
558	ZINC000004095717	Harzol	World_NOT_FDA	-10.8	0	1	94
559	ZINC000004099004	EstroneGlucuronide	World_NOT_FDA	-10.8	0	1	82
560	ZINC000013449412	6-O-Desmethyldonepezil	World_NOT_FDA	-10.8	0	0	63
561	ZINC000019632700	Naftopidil	World_NOT_FDA	-10.8	0	0	69
562	ZINC000028870000		World_NOT_FDA	-10.8	0	0	57
563	ZINC000068206930		World_NOT_FDA	-10.8	1	2	95
564	ZINC000000538564	casodex	FDA	-10.8	0	1	66
565	ZINC000000597013	donepezil	FDA	-10.8	0	0	61
566	ZINC000000643143	nizoral	FDA	-10.8	2	3	116
567	ZINC000000899797	(r)-glabridin	Metab	-10.8	0	1	44
568	ZINC000000900105		Metab	-10.8	2	0	66
569	ZINC000001530788	cromolyn	FDA	-10.8	0	0	78
570	ZINC000001532097	asana	Metab	-10.8	0	1	84
571	ZINC000001532100	asana	Metab	-10.8	0	1	70
572	ZINC000001557162	trp-trp	Metab	-10.8	1	0	68
573	ZINC000001557163	trp-trp	Metab	-10.8	1	0	66
574	ZINC000001557164	trp-trp	Metab	-10.8	1	0	73
575	ZINC000002545077		Metab	-10.8	0	3	87
576	ZINC000002568036	dantrolene	FDA	-10.8	2	0	40
577	ZINC000002584477	p-octyloxybenzylidene-p-cyanoaniline	Metab	-10.8	2	0	58
578	ZINC000003791931	d-tocotrienol	Metab	-10.8	0	2	85
579	ZINC000003861782	ota	Metab	-10.8	0	0	63
580	ZINC000004026533	isoglabranin	Metab	-10.8	0	0	56
581	ZINC000004073977	sitostenone	Metab	-10.8	0	3	81
582	ZINC000004082125	kopeodin	Metab	-10.8	0	0	61
583	ZINC000004098719	glabridin	Metab	-10.8	0	1	45
584	ZINC000004214603	halobetasol	FDA	-10.8	0	0	94
585	ZINC000005380738	kopeodin	Metab	-10.8	0	0	57
586	ZINC000005380740	kopeodin	Metab	-10.8	0	0	59
587	ZINC000008214619		FDA	-10.8	1	1	94
588	ZINC000012494196	cholesterolsulfate	Metab	-10.8	1	2	93
589	ZINC000013130921	glycyrol	Metab	-10.8	0	0	59
590	ZINC000013130928	glabrone	Metab	-10.8	1	3	55
591	ZINC000014610053		Metab	-10.8	0	1	39
592	ZINC000014762755	licoflavonol	Metab	-10.8	1	0	47
593	ZINC000014762969	gancaoninn	Metab	-10.8	0	0	62
594	ZINC000014819625	3,9-dihydroxy-1-methoxy-2-prenylpterocarpene	Metab	-10.8	0	0	48
595	ZINC000015206004	murrayanol	Metab	-10.8	0	2	65
596	ZINC000015214245	kopeodin	Metab	-10.8	0	0	60
597	ZINC000018258326	desamin	Metab	-10.8	0	0	48
598	ZINC000022010649	panobinostat	FDA	-10.8	0	0	55
599	ZINC000030729696		Metab	-10.8	0	2	93
600	ZINC000030729814	(22alpha)-hydroxy-campest-4-en-3-one	Metab	-10.8	0	3	83
601	ZINC000038147404		Metab	-10.8	0	0	49
602	ZINC000051951647		FDA	-10.8	0	0	53
603	ZINC000059728952		Metab	-10.8	1	1	70
604	ZINC000084758479	brexpiprazole	FDA	-10.8	0	1	94
605	ZINC000100017856	mepron	FDA	-10.8	0	2	57
606	ZINC000100048114	e105	Metab	-10.8	1	1	63
607	ZINC000253609252		Metab	-10.8	0	2	100
608	ChEBI_5852	Ibogaine	Agonists-Antagonists	-10.7	0	0	66
609	CID_163331	Prasteroneenanthate	Agonists-Antagonists	-10.7	0	2	83
610	LMST01010000	Cholestaneskeleton	Chol, Sterols	-10.7	0	0	85
611	LMST01010133	24-oxocholesterol	Chol, Sterols	-10.7	0	1	83
612	LMST01010225	4,4-Dimethylcholest-8-enol	Chol, Sterols	-10.7	0	2	93
613	LMST01010311	-	Chol, Sterols	-10.7	0	0	75
614	LMST01010317	22Z-dehydrocholesterol	Chol, Sterols	-10.7	0	2	77
615	LMST01031206	CertonardosterolJ	Erg, Sterol_Lipids	-10.7	0	1	93
616	LMST01030097	Campesterol	Erg, Sterols	-10.7	0	3	84
617	LMST01030108	-	Erg, Sterols	-10.7	0	2	98
618	LMST01030110	-	Erg, Sterols	-10.7	0	3	83
619	LMST01030111	epicodisterol	Erg, Sterols	-10.7	0	2	88
620	LMST01030134	6alpha-hydroxycampestanol	Erg, Sterols	-10.7	0	0	96
621	LMST01031033	Aplysterol	Erg, Sterols	-10.7	0	1	99
622	LMST01031066	-	Erg, Sterols	-10.7	0	2	93
623	LMST01031077	-	Erg, Sterols	-10.7	0	4	107
624	LMST01031090	NorselicacidC	Erg, Sterols	-10.7	1	1	80
625	LMST01031162	3beta,4beta-dihydroxyergosta-24(28)-en-23-one	Erg, Sterols	-10.7	0	3	88
626	61V		PDB	-10.7	0	0	54
627	LMST02020067	-	Steroids, Androgens, Sterol_Lipids	-10.7	1	0	58
628	LMST02020082	6-dehydrotestosterone	Steroids, Androgens, Sterol_Lipids	-10.7	0	0	46
629	LMST02030180	prednisone	Steroids, Estrogens, Sterol_Lipids	-10.7	0	0	69
630	LMST02030195	21-Deoxycortisol	Steroids, Estrogens, Sterol_Lipids	-10.7	0	0	72
631	LMST01100033	Cycloart-23-ene-3beta,25-diolmethylether	Sterol_Lipids	-10.7	0	3	109
632	LMST03010045	1beta,25-dihydroxy-24-epivitaminD2/1beta,25-dihydroxy-24-epiergocalciferol	Sterol_Lipids	-10.7	1	3	100
633	LMST03020084	1alpha-fluoro-25-hydroxy-16,17,23,23,24,24-hexadehydrovitaminD3/1alpha-fluoro-25-hydroxy-16,17,23,23,24,24-hexadehydrocholecalciferol	Sterol_Lipids	-10.7	0	2	100
634	LMST03020087	6,19-epidioxy-26,26,26,27,27,27-hexafluoro-25-hydroxy-6,19-dihydrovitaminD3/6,19-epidioxy-26,26,26,27,27,27-hexafluoro-25-hydroxy-6,19-dihydrocholecalciferol	Sterol_Lipids	-10.7	0	3	100
635	LMST03020101	(23Z)-25-hydroxy-16,17,23,24-tetradehydrovitaminD3/(23Z)-25-hydroxy-16,17,23,24-tetradehydrocholecalciferol	Sterol_Lipids	-10.7	0	1	99
636	LMST03020103	1alpha-hydroxy-24-oxo-26,27-cyclovitaminD3/1alpha-hydroxy-24-oxo-26,27-cyclocholecalciferol	Sterol_Lipids	-10.7	0	2	102
637	LMST03020137	24,24-difluoro-1alpha-hydroxyvitaminD3/24,24-difluoro-1alpha-hydroxycholecalciferol	Sterol_Lipids	-10.7	0	2	106
638	LMST03020146	(6RS)-6,19-epidioxy-24,24-difluoro-25-hydroxy-6,19-dihydrovitaminD3/(6RS)-6,19-epidioxy-24,24-difluoro-25-hydroxy-6,19-dihydrocholecalciferol	Sterol_Lipids	-10.7	0	2	104
639	LMST03020200	(5E,10Z)-19-fluorovitaminD3/(5E,10Z)-19-fluorocholecalciferol	Sterol_Lipids	-10.7	0	2	99
640	LMST03020226	toxisterol3D1	Sterol_Lipids	-10.7	0	2	88
641	LMST03020227	toxisterol3E1	Sterol_Lipids	-10.7	1	2	94
642	LMST03020248	(6R)-6,19-epidioxy-6,19-dihydrovitaminD3/(6R)-6,19-epidioxy-6,19-dihydrocholecalciferol	Sterol_Lipids	-10.7	0	1	98
643	LMST03020265	(5E)-1alpha,25-dihydroxyvitaminD3/(5E)-1alpha,25-dihydroxycholecalciferol	Sterol_Lipids	-10.7	0	1	106
644	LMST03020313	calicoferolD	Sterol_Lipids	-10.7	0	2	92
645	LMST03020479	1alpha-hydroxy-22-[3-(1-hydroxy-1-methylethyl)phenyl]-23,24,25,26,27-pentanorvitaminD3/1alpha-hydroxy-22-[3-(1-hydroxy-1-methylethyl)phenyl]-23,24,25,26,27-pentanorcholecalciferol	Sterol_Lipids	-10.7	0	2	104
646	LMST03020609	1alpha,25-Dihydroxy-16-ene-19-nor-24-oxovitaminD3	Sterol_Lipids	-10.7	0	1	105
647	LMST03020647	24,24-Difluoro-1,25,26-trihydroxyvitaminD3	Sterol_Lipids	-10.7	0	1	102
648	LMST03040003	ProvitaminD5	Sterol_Lipids	-10.7	0	1	95
649	LMST03050001	VitaminD6	Sterol_Lipids	-10.7	0	2	97
650	LMST04010235	-	Sterol_Lipids	-10.7	0	1	62
651	LMST04010396	-	Sterol_Lipids	-10.7	0	1	68
652	LMST05020012	24-methylene-cholesterolsulfate	Sterol_Lipids	-10.7	0	3	93
653	LMST01040121	-	Sterols	-10.7	0	3	95
654	LMST01040122	Clionasterol	Sterols	-10.7	0	3	93
655	LMST01040129	Sitosterol	Sterols	-10.7	0	2	93
656	LMST01040140	Spinasterol	Sterols	-10.7	0	3	100
657	LMST01040142	-	Sterols	-10.7	0	2	94
658	LMST01040143	-	Sterols	-10.7	0	4	89
659	LMST01040147	-	Sterols	-10.7	0	3	108
660	LMST01040150	-	Sterols	-10.7	0	5	109
661	LMST01040155	5-Dehydro-avenasterol	Sterols	-10.7	0	2	95
662	LMST01040160	Isostelliferasterol	Sterols	-10.7	0	4	106
663	LMST01040163	(25E)-26-methylstrongylosterol	Sterols	-10.7	0	3	103
664	LMST01040173	-	Sterols	-10.7	0	4	105
665	LMST01100030	Cycloarta-23-ene-3beta,25-diol	Sterols	-10.7	0	3	105
666	LMST01110013	Nicasterol	Sterols	-10.7	0	4	92
667	LMST01120004	cannogenin	Sterols	-10.7	3	3	82
668	LMST01130004	Hellebrigenin	Sterols	-10.7	1	2	87
669	LMST01130024	Desacetylbufotalin	Sterols	-10.7	1	5	87
670	ZINC000001481831	Sitaxentan	World_NOT_FDA	-10.7	0	0	59
671	ZINC000003831462	Sofalcone	World_NOT_FDA	-10.7	0	0	75
672	ZINC000003872493		World_NOT_FDA	-10.7	0	0	44
673	ZINC000004096712	Stigmasterin	World_NOT_FDA	-10.7	0	3	94
674	ZINC000004099035	Estradiol17bGlucuronide	World_NOT_FDA	-10.7	0	1	76
675	ZINC000006030359	NaproxenO-Glucuronide	World_NOT_FDA	-10.7	1	0	68
676	ZINC000011616657		World_NOT_FDA	-10.7	0	0	84
677	ZINC000013515301	17-Beta-EstradiolGlucuronide	World_NOT_FDA	-10.7	0	1	79
678	ZINC000019632696	Naftopidil	World_NOT_FDA	-10.7	0	0	81
679	ZINC000022034381	Lidoflazine	World_NOT_FDA	-10.7	0	3	116
680	ZINC000033972992		World_NOT_FDA	-10.7	2	2	92
681	ZINC000033972993		World_NOT_FDA	-10.7	0	1	87
682	ZINC000077269419	N-OxideAbirateroneSulfate	World_NOT_FDA	-10.7	2	2	87
683	ZINC000089224316		World_NOT_FDA	-10.7	2	1	80
684	ZINC000100229169	Fluindarol	World_NOT_FDA	-10.7	0	0	46
685	ZINC000224657532		World_NOT_FDA	-10.7	0	2	74
686	ZINC000000000655	biltricide	FDA	-10.7	0	0	64
687	ZINC000000607986		FDA	-10.7	0	0	55
688	ZINC000000897251	donepezil	FDA	-10.7	0	0	57
689	ZINC000000897408	casodex	FDA	-10.7	2	2	63
690	ZINC000001532098	asana	Metab	-10.7	0	1	70
691	ZINC000001532105	flumiclorac-pentyl	Metab	-10.7	1	0	66
692	ZINC000001570586	3,3'-bijuglone	Metab	-10.7	1	0	61
693	ZINC000001851149	abilify	FDA	-10.7	0	1	81
694	ZINC000002032615	nix	FDA	-10.7	0	3	77
695	ZINC000002383231	benzofenap	Metab	-10.7	0	0	80
696	ZINC000002509755	o-desmethylcarvedilol	Metab	-10.7	0	0	74
697	ZINC000002528486	o-desmethylcarvedilol	Metab	-10.7	0	0	68
698	ZINC000003782599	proscar	FDA	-10.7	0	1	71
699	ZINC000003814422	android	FDA	-10.7	0	0	57
700	ZINC000003973334	aromasin	FDA	-10.7	0	0	61
701	ZINC000004080967	ligupersina	Metab	-10.7	0	3	68
702	ZINC000004654841	demethylphylloquinone	Metab	-10.7	0	1	110
703	ZINC000014658236	pipernonaline	Metab	-10.7	0	0	55
704	ZINC000014712185		Metab	-10.7	0	1	60
705	ZINC000014766825	br-xanthonea	Metab	-10.7	0	1	58
706	ZINC000014819484	corylin	Metab	-10.7	0	0	54
707	ZINC000031771385		Metab	-10.7	0	0	48
708	ZINC000035902489	xalkori	FDA	-10.7	0	4	85
709	ZINC000095619724	yellowaamx	Metab	-10.7	0	3	77
710	ZINC000100051144	yellowaamx	Metab	-10.7	0	3	80
711	ZINC000116473771		FDA	-10.7	0	1	71
712	ZINC000238750729		Metab	-10.7	0	0	74
713	ZINC000257446275		Metab	-10.7	0	3	91
714	ZINC000257463480		Metab	-10.7	0	1	59
715	ZINC000306121574		Metab	-10.7	0	0	91
716	ChEBI_53289	Donepezil	Agonists-Antagonists	-10.6	0	0	61
717	LMST01010099	-	Chol, Sterols	-10.6	0	1	89
718	LMST01010144	22R-hydroxycholesterol(d7)	Chol, Sterols	-10.6	0	1	87
719	LMST01010171	zymosterolintermediate1b	Chol, Sterols	-10.6	0	1	75
720	LMST01010202	4alpha-methylzymosterol	Chol, Sterols	-10.6	0	1	90
721	LMST01010206	5alpha-cholesta-7,24-dien-3beta-ol	Chol, Sterols	-10.6	0	2	83
722	LMST01010210	Ecdysone	Chol, Sterols	-10.6	1	1	95
723	LMST01010239	-	Chol, Sterols	-10.6	0	1	84
724	LMST01010252	-	Chol, Sterols	-10.6	0	2	103
725	LMST01010253	-	Chol, Sterols	-10.6	0	0	76
726	LMST01010281	-	Chol, Sterols	-10.6	0	1	86
727	LMST01010353	1,4-cholestadienone	Chol, Sterols	-10.6	0	2	80
728	LMST01010354	4beta-OH-7-DHC	Chol, Sterols	-10.6	0	1	88
729	LMST01010363	-	Chol, Sterols	-10.6	0	2	80
730	LMST01010412	-	Chol, Sterols	-10.6	0	2	88
731	LMST04030225	3beta-OH-Delta7-dafachronicacid	DeltaL, Sterol_Lipids	-10.6	0	3	90
732	LMST01030094	5-dihydroergosterol	Erg, Sterols	-10.6	0	4	96
733	LMST01030143	-	Erg, Sterols	-10.6	0	2	91
734	LMST01031026	-	Erg, Sterols	-10.6	0	6	93
735	LMST01031038	Isoxestospongesterol	Erg, Sterols	-10.6	0	4	98
736	LMST01031047	23-methylene-24-methylcholestanol	Erg, Sterols	-10.6	0	2	95
737	LMST01031052	(22E,24R)-24,26-dimethylcholesta-5,22,25(27)-trien-3beta-ol	Erg, Sterols	-10.6	1	2	80
738	LMST01031091	29-demethylgeodisterol-O-sulfite	Erg, Sterols	-10.6	1	2	96
739	LMST02020051	Epitestosterone	Steroids, Androgens, Sterol_Lipids	-10.6	0	0	52
740	LMST02020107	Mesterolone	Steroids, Androgens, Sterol_Lipids	-10.6	0	1	66
741	LMST05010012	Testosteroneglucuronide	Steroids, Androgens, Sterol_Lipids	-10.6	1	2	92
742	LMST05010041	5-alpha-Dihydrotestosteroneglucuronide	Steroids, Androgens, Sterol_Lipids	-10.6	0	1	90
743	LMST02030179	prednisolone	Steroids, DeltaL, Estrogens, Sterol_Lipids	-10.6	0	0	77
744	LMST02030090	Cortisone	Steroids, Estrogens, Sterol_Lipids	-10.6	0	0	72
745	LMST02030201	Ethyltestosterone	Steroids, Estrogens, Sterol_Lipids	-10.6	0	1	59
746	LMST02030225	HDOPA	Steroids, Estrogens, Sterol_Lipids	-10.6	0	1	67
747	LMST02030241	PenicildioneD	Steroids, Estrogens, Sterol_Lipids	-10.6	0	0	83
748	LMST02010012	-	Steroids, Sterol_Lipids	-10.6	0	0	46
749	LMST03010001	VitaminD2	Sterol_Lipids	-10.6	1	3	88
750	LMST03010034	(6R)-vitaminD26,19-sulfurdioxideadduct/(6R)-ergocalciferol6,19-sulfurdioxideadduct	Sterol_Lipids	-10.6	0	3	100
751	LMST03010042	5(E)-1alpha,25-dihydroxyvitaminD2/5(E)-1alpha,25-dihydroxyergocalciferol	Sterol_Lipids	-10.6	0	2	99
752	LMST03020018	(5E)-(22S)-22-hydroxy-24,25,26,27-tetranorvitaminD3/(5E)-(22S)-22-hydroxy-24,25,26,27-tetranorcholecalciferol	Sterol_Lipids	-10.6	0	0	74
753	LMST03020110	(23Z)-1alpha,25-dihydroxy-16,17,23,24-tetradehydrovitaminD3/(23Z)-1alpha,25-dihydroxy-16,17,23,24-tetradehydrocholecalciferol	Sterol_Lipids	-10.6	1	1	106
754	LMST03020118	(23S,25S)-25-hydroxyvitaminD326,23-lactone/(23S,25S)-25-hydroxycholecalciferol26,23-lactone	Sterol_Lipids	-10.6	0	1	107
755	LMST03020130	(20S,24S)-20-fluoro-1alpha,24-dihydroxy-26,27-cyclovitaminD3/(20S,24S)-20-fluoro-1alpha,24-dihydroxy-26,27-cyclocholecalciferol	Sterol_Lipids	-10.6	0	1	102
756	LMST03020202	22-fluorovitaminD3/22-fluorocholecalciferol	Sterol_Lipids	-10.6	0	1	96
757	LMST03020234	(5E)-1alpha-hydroxy-3-epivitaminD3/(5E)-1alpha-hydroxy-3-epicholecalciferol	Sterol_Lipids	-10.6	0	2	95
758	LMST03020239	2alpha-hydroxyvitaminD3/2alpha-hydroxycholecalciferol	Sterol_Lipids	-10.6	0	2	92
759	LMST03020241	1alpha,25-dihydroxy-3-deoxyvitaminD3/1alpha,25-dihydroxy-3-deoxycholecalciferol	Sterol_Lipids	-10.6	0	0	98
760	LMST03020566	1alpha,25-dihydroxy-3-deoxy-19-nor-22-oxavitaminD3/1alpha,25-dihydroxy-3-deoxy-19-nor-22-oxacholecalciferol	Sterol_Lipids	-10.6	0	1	89
761	LMST03020600	(23R)-1alpha-hydroxy-25,27-didehydrovitaminD326,23-lactone	Sterol_Lipids	-10.6	0	1	96
762	LMST03030004	22-HydroxyVitaminD4	Sterol_Lipids	-10.6	0	2	91
763	LMST04010245	-	Sterol_Lipids	-10.6	1	1	75
764	LMST04010361	-	Sterol_Lipids	-10.6	0	2	71
765	LMST04010364	-	Sterol_Lipids	-10.6	0	2	70
766	LMST04010429	-	Sterol_Lipids	-10.6	0	1	66
767	LMST04030255	7alpha-hydroxy-3-oxo-4-cholestenoicacid	Sterol_Lipids	-10.6	0	1	82
768	LMST01040139	-	Sterols	-10.6	0	3	91
769	LMST01040195	22S-hydroxysitosterol	Sterols	-10.6	0	2	95
770	LMST01040249	beta-Sitostenone	Sterols	-10.6	0	3	104
771	LMST01040260	leucisterol	Sterols	-10.6	0	2	94
772	LMST01040271	Saringosterone	Sterols	-10.6	0	0	99
773	LMST01060004	-	Sterols	-10.6	0	3	89
774	LMST01060014	StoloniferoneJ	Sterols	-10.6	1	2	105
775	LMST01100010	(24R)-24-methylcycloart-25-en-3beta-ol	Sterols	-10.6	0	3	96
776	LMST01110004	(23R)-isocalysterol	Sterols	-10.6	0	2	92
777	LMST01150008	Etioline	Sterols	-10.6	0	2	95
778	LMST01150009	Leptinidine	Sterols	-10.6	0	5	79
779	LMST01150011	25-iso-etioline	Sterols	-10.6	0	3	85
780	LMST01150012	22-iso-teinemine	Sterols	-10.6	2	3	82
781	ZINC000000490791	Testosterone	World_NOT_FDA	-10.6	0	0	71
782	ZINC000000538650	Indiplon	World_NOT_FDA	-10.6	1	0	64
783	ZINC000001542146	Pranlukast	World_NOT_FDA	-10.6	1	1	114
784	ZINC000002528486	O-Desmethylcarvedilol	World_NOT_FDA	-10.6	2	0	60
785	ZINC000003830847	Flubendazole	World_NOT_FDA	-10.6	0	0	37
786	ZINC000003831004		World_NOT_FDA	-10.6	0	0	56
787	ZINC000003871698	Benzthiazide	World_NOT_FDA	-10.6	0	0	71
788	ZINC000003871889	Carindacillin	World_NOT_FDA	-10.6	0	2	86
789	ZINC000004098264	Fumagillin	World_NOT_FDA	-10.6	3	3	104
790	ZINC000004098610	Dzn	World_NOT_FDA	-10.6	1	0	67
791	ZINC000004217252	Penfluridol	World_NOT_FDA	-10.6	0	3	92
792	ZINC000004228237	Tetra-H-Folate	World_NOT_FDA	-10.6	1	0	85
793	ZINC000008234384		World_NOT_FDA	-10.6	0	2	84
794	ZINC000008582008	N-DesmethylVandetanib	World_NOT_FDA	-10.6	1	2	84
795	ZINC000013449462	5-O-Desmethyldonepezil	World_NOT_FDA	-10.6	0	0	73
796	ZINC000013831791	Ptc124	World_NOT_FDA	-10.6	1	0	41
797	ZINC000031417974	KetoprofenGlucuronide	World_NOT_FDA	-10.6	0	1	64
798	ZINC000031417978	KetoprofenGlucuronide	World_NOT_FDA	-10.6	0	0	67
799	ZINC000036387179	11-deoxycorticosteronepivalate	World_NOT_FDA	-10.6	0	3	91
800	ZINC000040164488		World_NOT_FDA	-10.6	0	2	90
801	ZINC000053073961	Antrafenine	World_NOT_FDA	-10.6	1	2	142
802	ZINC000065742834	5-Hydroxybuspirone	World_NOT_FDA	-10.6	1	1	78
803	ZINC000077287124	N-Desmethyleletriptan	World_NOT_FDA	-10.6	1	0	68
804	ZINC000095619120	3-Trans-HydroxycyclohexylGlyburide	World_NOT_FDA	-10.6	2	0	114
805	ZINC000000518998	isoglabranin	Metab	-10.6	0	0	53
806	ZINC000000704422		Metab	-10.6	0	4	66
807	ZINC000000704423		Metab	-10.6	1	2	72
808	ZINC000000712672	7,11,12-triacetoxycoumestan	Metab	-10.6	0	0	67
809	ZINC000001445635		Metab	-10.6	0	1	68
810	ZINC000001540998		FDA	-10.6	1	0	71
811	ZINC000001849660	halofuginone	Metab	-10.6	2	0	66
812	ZINC000001916008	d-tocotrienol	Metab	-10.6	0	2	91
813	ZINC000001996784	myrbetriq	FDA	-10.6	1	0	87
814	ZINC000002008020	benzo[a]pyrene-4,5-oxide	Metab	-10.6	0	1	39
815	ZINC000002575127	phe-trp	Metab	-10.6	1	0	50
816	ZINC000002575132	tyr-trp	Metab	-10.6	1	0	55
817	ZINC000002585906	1-phenyl-4-(1-phenylethyl)tetralin	Metab	-10.6	0	2	58
818	ZINC000003876136	luxiq	FDA	-10.6	0	0	83
819	ZINC000004491418	conferol	Metab	-10.6	0	3	69
820	ZINC000004491419		Metab	-10.6	0	2	65
821	ZINC000004654840	demethylphylloquinone	Metab	-10.6	0	0	106
822	ZINC000005158610	2',4',5,7-tetrahydroxy-5'-geranylflavanone	Metab	-10.6	0	2	76
823	ZINC000005751264	25-hydroxycholesterol	Metab	-10.6	0	0	88
824	ZINC000005784191	halofuginone	Metab	-10.6	2	0	59
825	ZINC000013328774	6-o-acetyldaidzin	Metab	-10.6	1	0	72
826	ZINC000013449462	5-o-desmethyldonepezil	Metab	-10.6	0	1	62
827	ZINC000013485697		Metab	-10.6	0	2	67
828	ZINC000013512486		Metab	-10.6	1	1	43
829	ZINC000013831130	raltegravir	FDA	-10.6	1	1	61
830	ZINC000013838497	piperettine	Metab	-10.6	0	0	50
831	ZINC000014454692		Metab	-10.6	0	0	54
832	ZINC000014651456	phe-trp	Metab	-10.6	1	0	51
833	ZINC000014763011	gancaoninb	Metab	-10.6	0	0	62
834	ZINC000014824079	n-caffeoyltryptophan	Metab	-10.6	0	0	53
835	ZINC000014883354	dihydrophylloquinone	Metab	-10.6	0	0	114
836	ZINC000016343334	previtamind4	Metab	-10.6	0	0	95
837	ZINC000021981235	lansoprazolesulfone	Metab	-10.6	0	0	34
838	ZINC000030729723	campest-4-en-3-one	Metab	-10.6	0	3	83
839	ZINC000034303701	tyr-trp	Metab	-10.6	1	0	49
840	ZINC000034303702	tyr-trp	Metab	-10.6	2	0	53
841	ZINC000034303703	tyr-trp	Metab	-10.6	1	0	53
842	ZINC000036375370	daidzein4'-o-glucuronide	Metab	-10.6	0	0	58
843	ZINC000053683345	caprelsa	FDA	-10.6	1	1	88
844	ZINC000070457358		Metab	-10.6	1	1	81
845	ZINC000100005073	indigocarmine	Metab	-10.6	0	0	60
846	ZINC000144006246		Metab	-10.6	0	2	74
847	ZINC000238777009		Metab	-10.6	0	2	69
848	ZINC000256427287		Metab	-10.6	0	1	84
849	ZINC000257463481		Metab	-10.6	0	1	61
850	ZINC000257536029		Metab	-10.6	1	1	73
851	ZINC000257782821		Metab	-10.6	1	0	76
852	LMST01010001	Cholesterol	Chol, Sterols	-10.5	0	1	85
853	LMST01010016	Desmosterol	Chol, Sterols	-10.5	0	2	78
854	LMST01010019	24S-hydroxy-cholesterol	Chol, Sterols	-10.5	1	1	84
855	LMST01010090	Desmosterol(d6)	Chol, Sterols	-10.5	0	2	83
856	LMST01010093	Cholesterol(d7)	Chol, Sterols	-10.5	0	1	85
857	LMST01010121	7-dehydro-desmosterol	Chol, Sterols	-10.5	0	2	83
858	LMST01010176	14-demethyllanosterol	Chol, Sterols	-10.5	0	3	97
859	LMST01010180	2-dehydroecdysone	Chol, Sterols	-10.5	0	1	93
860	LMST01010237	3-keto-4alpha-methyl-zymosterol	Chol, Sterols	-10.5	0	4	72
861	LMST01010256	-	Chol, Sterols	-10.5	0	2	78
862	LMST01010290	15-dehydro-A-norcholestanol	Chol, Sterols	-10.5	1	3	83
863	LMST01010324	-	Chol, Sterols	-10.5	0	5	81
864	LMST01010347	Dihydromarthasterone	Chol, Sterols	-10.5	0	1	86
865	LMST01010387	22-oxocholesterol	Chol, Sterols	-10.5	0	1	82
866	LMST04030224	3alpha-OH-Delta7-dafachronicacid	DeltaL, Sterol_Lipids	-10.5	0	1	94
867	LMST01031205	CertonardosterolI	Erg, Sterol_Lipids	-10.5	1	2	103
868	LMST01030107	-	Erg, Sterols	-10.5	0	4	92
869	LMST01030114	24-epibrassicasterol	Erg, Sterols	-10.5	0	4	84
870	LMST01030133	6-oxocampestanol	Erg, Sterols	-10.5	0	2	87
871	LMST01030140	-	Erg, Sterols	-10.5	0	3	90
872	LMST01031032	Verongulasterol	Erg, Sterols	-10.5	0	2	103
873	LMST01031039	Xestospongesterol	Erg, Sterols	-10.5	0	4	101
874	LMST01031040	25-methylxestosterol	Erg, Sterols	-10.5	0	5	99
875	LMST01031062	-	Erg, Sterols	-10.5	1	4	84
876	LMST01031075	(20S,24S)-ThornasterolB	Erg, Sterols	-10.5	0	2	93
877	LMST01031076	(20S,24R)-ThornasterolB	Erg, Sterols	-10.5	1	2	101
878	LMST01031095	StoloniferoneH	Erg, Sterols	-10.5	1	3	115
879	LMST01031106	-	Erg, Sterols	-10.5	1	2	82
880	LMST02020019	4-Chlorotestosterone	Steroids, Androgens, Sterol_Lipids	-10.5	0	0	60
881	LMST02020028	Methenolone	Steroids, Androgens, Sterol_Lipids	-10.5	0	0	61
882	LMST02020029	17-Methyltestosterone	Steroids, Androgens, Sterol_Lipids	-10.5	0	0	53
883	LMST02020075	Testosteroneenanthate	Steroids, Androgens, Sterol_Lipids	-10.5	1	1	90
884	LMST02020076	Testosteronepropionate	Steroids, Androgens, Sterol_Lipids	-10.5	0	2	67
885	LMST05010013	Androsterone3-glucuronide	Steroids, Androgens, Sterol_Lipids	-10.5	0	1	85
886	LMST02030091	18-Hydroxycorticosterone	Steroids, Estrogens, Sterol_Lipids	-10.5	1	0	75
887	LMST02030145	Aldosteronehemiacetal	Steroids, Estrogens, Sterol_Lipids	-10.5	2	1	71
888	LMST03010044	1beta,25-dihydroxyvitaminD2/1beta,25-dihydroxyergocalciferol	Sterol_Lipids	-10.5	0	3	96
889	LMST03020036	(17Z)-1alpha,25-dihydroxy-17,20-didehydro-21-norvitaminD3/(17Z)-1alpha,25-dihydroxy-17,20-didehydro-21-norcholecalciferol	Sterol_Lipids	-10.5	0	1	85
890	LMST03020040	25-hydroxy-3-deoxy-2-oxavitaminD3/25-hydroxy-3-deoxy-2-oxacholecalciferol	Sterol_Lipids	-10.5	0	0	90
891	LMST03020044	1alpha-hydroxy-22-oxavitaminD3/1alpha-hydroxy-22-oxacholecalciferol	Sterol_Lipids	-10.5	0	1	94
892	LMST03020051	(5Z)-1alpha,25-dihydroxy-3-deoxy-3-thiavitaminD33-oxide/(5Z)-1alpha,25-dihydroxy-3-deoxy-3-thiacholecalciferol3-oxide	Sterol_Lipids	-10.5	0	1	100
893	LMST03020074	1alpha,25-dihydroxy-19-norvitaminD3/1alpha,25-dihydroxy-19-norcholecalciferol	Sterol_Lipids	-10.5	0	1	104
894	LMST03020077	26,26,26,27,27,27-hexafluoro-25-hydroxy-16,17,23,23,24,24-hexadehydrovitaminD3/26,26,26,27,27,27-hexafluoro-25-hydroxy-16,17,23,23,24,24-hexadehydrocholecalciferol	Sterol_Lipids	-10.5	1	3	87
895	LMST03020092	(22E)-1alpha-hydroxy-24-oxo-26,27-cyclo-22,23-didehydrovitaminD3/(22E)-1alpha-hydroxy-24-oxo-26,27-cyclo-22,23-didehydrocholecalciferol	Sterol_Lipids	-10.5	0	2	84
896	LMST03020106	(22E)-(24S)-1alpha,24-dihydroxy-26,27-cyclo-22,23-didehydrovitaminD3/(22E)-(24S)-1alpha,24-dihydroxy-26,27-cyclo-22,23-didehydrocholecalciferol/Calcipotriol	Sterol_Lipids	-10.5	2	2	87
897	LMST03020128	(20S,24R)-20-fluoro-1alpha,24-dihydroxy-26,27-cyclovitaminD3/(20S,24R)-20-fluoro-1alpha,24-dihydroxy-26,27-cyclocholecalciferol	Sterol_Lipids	-10.5	0	2	104
898	LMST03020149	(22E)-1beta-hydroxy-22,23-didehydrovitaminD3/(22E)-1beta-hydroxy-22,23-didehydrocholecalciferol	Sterol_Lipids	-10.5	0	3	95
899	LMST03020153	1alpha-hydroxy-24,25-didehydrovitaminD3/1alpha-hydroxy-24,25-didehydrocholecalciferol	Sterol_Lipids	-10.5	0	4	98
900	LMST03020159	1alpha-hydroxy-22-oxovitaminD3/1alpha-hydroxy-22-oxocholecalciferol	Sterol_Lipids	-10.5	1	2	97
901	LMST03020197	6-fluorovitaminD3/6-fluorocholecalciferol	Sterol_Lipids	-10.5	0	3	94
902	LMST03020198	(10Z)-19-fluorovitaminD3/(10Z)-19-fluorocholecalciferol	Sterol_Lipids	-10.5	0	1	78
903	LMST03020199	(10E)-19-fluorovitaminD3/(10E)-19-fluorocholecalciferol	Sterol_Lipids	-10.5	0	1	80
904	LMST03020209	1alpha-fluoro-25-hydrovitaminD3/1alpha-fluoro-25-hydrocholecalciferol	Sterol_Lipids	-10.5	0	0	104
905	LMST03020215	(5E,10E)-19-fluoro-1alpha,25-dihydroxyvitaminD3/(5E,10E)-19-fluoro-1alpha,25-dihydroxycholecalciferol	Sterol_Lipids	-10.5	0	2	114
906	LMST03020261	1alpha,25-dihydroxy-14-epiprevitaminD3/1alpha,25-dihydroxy-14-epiprecholecalciferol	Sterol_Lipids	-10.5	0	1	88
907	LMST03020281	(6R)-6,19-epidioxy-25-hydroxy-6,19-dihydrovitaminD3/(6R)-6,19-epidioxy-25-hydroxy-6,19-dihydrocholecalciferol	Sterol_Lipids	-10.5	0	2	91
908	LMST03020311	1alpha-hydroxy-22-(4-hydroxyphenyl)-23,24,25,26,27-pentanorvitaminD3/1alpha-hydroxy-22-(4-hydroxyphenyl)-23,24,25,26,27-pentanorcholecalciferol	Sterol_Lipids	-10.5	1	2	98
909	LMST03020334	(10E)-19-methylvitaminD3/(10E)-19-methylcholecalciferol	Sterol_Lipids	-10.5	0	2	93
910	LMST03020342	(22R)-25-hydroxy-22-methoxyvitaminD3/(22R)-25-hydroxy-22-methoxycholecalciferol	Sterol_Lipids	-10.5	0	1	106
911	LMST03020568	25-dihydroxy-19-nor-22-oxa-3-epivitaminD3/25-dihydroxy-19-nor-22-oxa-3-epicholecalciferol	Sterol_Lipids	-10.5	0	0	80
912	LMST03020569	25-dihydroxy-19-nor-22-oxavitaminD3/25-dihydroxy-19-nor-22-oxacholecalciferol	Sterol_Lipids	-10.5	1	0	82
913	LMST03020619	3-Deoxy-25-hydroxyvitaminD3	Sterol_Lipids	-10.5	0	0	94
914	LMST03020664	25-DehydrovitaminD3	Sterol_Lipids	-10.5	0	2	88
915	LMST04010128	-	Sterol_Lipids	-10.5	0	0	74
916	LMST04010139	-	Sterol_Lipids	-10.5	0	0	76
917	LMST04010141	-	Sterol_Lipids	-10.5	0	2	83
918	LMST04010287	-	Sterol_Lipids	-10.5	0	1	84
919	LMST04010318	-	Sterol_Lipids	-10.5	0	1	69
920	LMST04030257	-	Sterol_Lipids	-10.5	0	1	86
921	LMST05020016	cholesterolsulfate	Sterol_Lipids	-10.5	2	2	100
922	LMST05020022	3b,16a-Dihydroxyandrostenonesulfate	Sterol_Lipids	-10.5	0	0	65
923	LMST01040152	ajugalactone	Sterols	-10.5	0	5	108
924	LMST01040161	Strongylosterol	Sterols	-10.5	0	1	99
925	LMST01040171	24R-Ethyl-26,26,27-trimethyl-3beta-hydroxycholesta-7,26-(30)-diene	Sterols	-10.5	0	2	108
926	LMST01040178	-	Sterols	-10.5	0	3	106
927	LMST01040189	NorselicacidA	Sterols	-10.5	1	1	94
928	LMST01040242	24-Ethyllophenol	Sterols	-10.5	0	4	99
929	LMST01050007	29-methylisofucosterol	Sterols	-10.5	0	5	96
930	LMST01060002	-	Sterols	-10.5	0	5	108
931	LMST01110016	Aragusteroketal	Sterols	-10.5	0	3	113
932	LMST01130012	19-hydroxytelocinobufagin	Sterols	-10.5	1	3	89
933	LMST01130013	11alpha,19-dihydroxytelocinobufagin	Sterols	-10.5	1	3	100
934	ZINC000000000928	Amlexanox	World_NOT_FDA	-10.5	0	0	45
935	ZINC000001542929	Lofepramine	World_NOT_FDA	-10.5	0	0	88
936	ZINC000003781942	Vesnarinone	World_NOT_FDA	-10.5	0	0	63
937	ZINC000003872178	Cypermethrin	World_NOT_FDA	-10.5	0	0	71
938	ZINC000003875469		World_NOT_FDA	-10.5	0	0	58
939	ZINC000004228235	Tetrahydrofolate	World_NOT_FDA	-10.5	1	1	84
940	ZINC000004428527	Desoxycortone	World_NOT_FDA	-10.5	2	0	71
941	ZINC000005497532	Methenolone	World_NOT_FDA	-10.5	0	0	61
942	ZINC000009330880	Rebamipide	World_NOT_FDA	-10.5	0	0	51
943	ZINC000021981272	Hydroxynefazodone	World_NOT_FDA	-10.5	1	1	115
944	ZINC000043100810	Delamanid	World_NOT_FDA	-10.5	0	1	100
945	ZINC000053231207	Methysergid	World_NOT_FDA	-10.5	1	0	69
946	ZINC000077269415	AbirateroneSulfate	World_NOT_FDA	-10.5	2	2	87
947	ZINC000248065217		World_NOT_FDA	-10.5	1	1	71
948	ZINC000000025958	rucaparib	FDA	-10.5	1	0	47
949	ZINC000000402911	fenbendazole	Metab	-10.5	1	0	43
950	ZINC000000643153	nizoral	FDA	-10.5	1	4	91
951	ZINC000000704424	feselol	Metab	-10.5	0	1	70
952	ZINC000000968326	pioglitazone	FDA	-10.5	0	0	55
953	ZINC000000968327	pioglitazone	FDA	-10.5	0	0	54
954	ZINC000001529772	piperin	Metab	-10.5	0	0	45
955	ZINC000001530571	buspirone	FDA	-10.5	1	1	76
956	ZINC000001658901	aurapten	Metab	-10.5	0	0	54
957	ZINC000001849658	halofuginone	Metab	-10.5	1	0	60
958	ZINC000001849659	halofuginone	Metab	-10.5	1	0	61
959	ZINC000001850377	nix	FDA	-10.5	0	0	76
960	ZINC000002008016	benzo[a]pyrene-4,5-oxide	Metab	-10.5	0	1	38
961	ZINC000002008017	benzo[a]pyrene-4,5-oxide	Metab	-10.5	0	1	39
962	ZINC000002008019	benzo[a]pyrene-4,5-oxide	Metab	-10.5	0	1	40
963	ZINC000002383057	phe-trp	Metab	-10.5	1	0	52
964	ZINC000002526388	4'-hydroxycarvedilol	Metab	-10.5	1	0	89
965	ZINC000002528509	4'-hydroxycarvedilol	Metab	-10.5	1	0	88
966	ZINC000003782818	atacand	FDA	-10.5	0	0	97
967	ZINC000003831329	k-ject	Metab	-10.5	0	0	117
968	ZINC000003831330	k-ject	Metab	-10.5	0	0	118
969	ZINC000003831331	k-ject	Metab	-10.5	0	1	121
970	ZINC000003831332	k-ject	Metab, FDA	-10.5	0	0	114
971	ZINC000003874185	mefloquine	FDA	-10.5	0	0	62
972	ZINC000003964126	xarelto	FDA	-10.5	1	1	68
973	ZINC000004099144		Metab	-10.5	0	4	90
974	ZINC000004654839	demethylphylloquinone	Metab	-10.5	0	1	113
975	ZINC000004731235		Metab	-10.5	0	1	70
976	ZINC000005722488	cyananin	Metab	-10.5	1	1	45
977	ZINC000005766454	tachysterol4	Metab	-10.5	0	1	94
978	ZINC000005854568	kanzonolh	Metab	-10.5	0	1	76
979	ZINC000005854773	fumitremorgin	Metab	-10.5	0	3	73
980	ZINC000007997897	naftin	FDA	-10.5	0	0	51
981	ZINC000008551808		Metab	-10.5	3	2	93
982	ZINC000011617039	pazopanib	FDA	-10.5	0	0	77
983	ZINC000013374706		Metab	-10.5	0	1	81
984	ZINC000013485433	2-(3-bromo-1,2-thiazol-4-yl)propanal	Metab	-10.5	0	2	79
985	ZINC000013542524	glycoursodeoxycholate	Metab	-10.5	0	4	98
986	ZINC000013544887		Metab	-10.5	0	1	68
987	ZINC000014505997	1-hydroxypinoresinol	Metab	-10.5	0	0	54
988	ZINC000014642871	icosylpalmitate	Metab	-10.5	0	1	61
989	ZINC000014651453	phe-trp	Metab	-10.5	1	0	52
990	ZINC000014658255	piperochromenoicacid	Metab	-10.5	0	0	55
991	ZINC000014819291	yinyanghuod	Metab	-10.5	0	0	59
992	ZINC000014819293	yinyanghuod	Metab	-10.5	0	0	66
993	ZINC000014824074	na-p-hydroxycoumaroyltryptophan	Metab	-10.5	1	0	55
994	ZINC000014824075	na-p-hydroxycoumaroyltryptophan	Metab	-10.5	0	0	39
995	ZINC000014824077	n-caffeoyltryptophan	Metab	-10.5	0	1	47
996	ZINC000015060719	malonyldaidzin	Metab	-10.5	2	1	84
997	ZINC000015258073	12a-hydroxymunduserone	Metab	-10.5	0	0	47
998	ZINC000040164545		Metab	-10.5	0	4	89
999	ZINC000064622563	5b-pregnanediol	Metab	-10.5	0	2	59
1000	ZINC000070455473	formononetin7-o-glucuronide	Metab	-10.5	0	1	58
1001	ZINC000090614856		Metab	-10.5	0	1	86
1002	ZINC000095618410		Metab	-10.5	0	3	94
1003	ZINC000095619100	ranolazine	FDA	-10.5	0	1	89
1004	ZINC000095620638		Metab	-10.5	0	2	62
1005	ZINC000252679615		FDA	-10.5	2	0	44
1006	ZINC000253497581		Metab	-10.5	0	3	104
1007	ZINC000256078660		Metab	-10.5	0	2	101
1008	ZINC000256427300		Metab	-10.5	0	2	86
1009	ZINC000256434206		Metab	-10.5	0	3	101
1010	ZINC000257416693		Metab	-10.5	0	3	94
1011	ZINC000257536027		Metab	-10.5	1	1	73
1012	CHEBI143575		Agonists-Antagonists	-10.4	0	2	85
1013	CID_125328	L-687,384	Agonists-Antagonists	-10.4	0	0	40
1014	LMST01010003	4beta-hydroxy-cholesterol(d7)	Chol, Sterols	-10.4	0	2	85
1015	LMST01010014	4beta-hydroxy-cholesterol	Chol, Sterols	-10.4	0	2	88
1016	LMST01010047	7beta-hydroxycholesterol	Chol, Sterols	-10.4	0	2	89
1017	LMST01010089	Lathosterol	Chol, Sterols	-10.4	0	2	82
1018	LMST01010092	24-hydroxy-cholesterol(d6)	Chol, Sterols	-10.4	0	2	87
1019	LMST01010111	CucurbitacinJ	Chol, Sterols	-10.4	2	5	122
1020	LMST01010140	-	Chol, Sterols	-10.4	0	2	89
1021	LMST01010141	-	Chol, Sterols	-10.4	0	4	101
1022	LMST01010148	24,25-epoxy-cholesterol(d6)	Chol, Sterols	-10.4	0	2	81
1023	LMST01010164	(24R)-24-hydroxycholesterol	Chol, Sterols	-10.4	0	1	92
1024	LMST01010172	3-dehydroecdysone	Chol, Sterols	-10.4	0	2	102
1025	LMST01010197	4alpha-methylcholest-8-en-3beta-ol	Chol, Sterols	-10.4	0	3	91
1026	LMST01010200	(20R,22R)-20,22-dihydroxycholesterol	Chol, Sterols	-10.4	0	3	96
1027	LMST01010242	8-Dehydrocholesterol	Chol, Sterols	-10.4	0	4	83
1028	LMST01010306	Echissaposterol	Chol, Sterols	-10.4	0	2	99
1029	LMST01010444	3beta,4beta-dihydroxycholesta-5-ene-23-one	Chol, Sterols	-10.4	0	2	78
1030	LMST01010445	3beta,4beta-dihydroxycholest-7(8)-en-23-one	Chol, Sterols	-10.4	0	2	90
1031	LMST01030120	6-deoxoteasterone	Erg, Sterols	-10.4	0	4	100
1032	LMST01030146	-	Erg, Sterols	-10.4	0	4	99
1033	LMST01031014	5alpha-ergosta-7,22-diene-3beta,5-diol	Erg, Sterols	-10.4	0	5	93
1034	LMST01031055	Remeisterol	Erg, Sterols	-10.4	0	2	91
1035	LMST01031097	StoloniferoneK	Erg, Sterols	-10.4	1	1	110
1036	LMST01031161	3beta,4beta-dihydroxyergosta-23-one	Erg, Sterols	-10.4	0	3	93
1037	LMST01031177	25-hydroxy-ergosta-4,6,8(14),22E-tetraen-3-one	Erg, Sterols	-10.4	0	3	79
1038	LMST02020070	-	Steroids, Androgens, Sterol_Lipids	-10.4	3	1	60
1039	LMST02020085	-	Steroids, Androgens, Sterol_Lipids	-10.4	0	1	59
1040	LMST02020121	11betaOH-5alpha-androstanedione	Steroids, Androgens, Sterol_Lipids	-10.4	0	1	50
1041	LMST02030001	Cortisol	Steroids, Estrogens, Sterol_Lipids	-10.4	0	0	76
1042	LMST02030087	11-deoxycorticosterone	Steroids, Estrogens, Sterol_Lipids	-10.4	0	0	68
1043	LMST02030169	(20S)-20-hydroxypregn-4-en-3-one	Steroids, Estrogens, Sterol_Lipids	-10.4	0	0	58
1044	LMST02030181	20-hydroxy-3-oxopregn-4-en-21-al	Steroids, Estrogens, Sterol_Lipids	-10.4	0	1	58
1045	LMST02030182	16alpha-hydroxyprogesterone	Steroids, Estrogens, Sterol_Lipids	-10.4	0	0	66
1046	LMST05020041	17-Beta-Estradiol-3,17-beta-sulfate	Steroids, Sterol_Lipids	-10.4	1	0	70
1047	LMST01160051	WithasomniferolD	Sterol_Lipids	-10.4	1	3	103
1048	LMST03010018	(5Z)-isovitaminD2/5,6-cis-isovitaminD2/(5Z)-isoergocalciferol/5,6-cis-isoergocalciferol	Sterol_Lipids	-10.4	0	5	86
1049	LMST03010028	1alpha-hydroxyvitaminD2/1alpha-hydroxyergocalciferol	Sterol_Lipids	-10.4	0	2	109
1050	LMST03010031	24-epi-25-hydroxyvitaminD2/24-epi-25-hydroxyergocalciferol	Sterol_Lipids	-10.4	0	2	85
1051	LMST03010038	-	Sterol_Lipids	-10.4	0	1	96
1052	LMST03010046	5(E)-1beta,25-dihydroxyvitaminD2/1beta,25-dihydroxyergocalciferol	Sterol_Lipids	-10.4	1	1	104
1053	LMST03020056	(24R)-1alpha,24-dihydroxy-22-oxavitaminD3/(24R)-1alpha,24-dihydroxy-22-oxacholecalciferol	Sterol_Lipids	-10.4	0	2	95
1054	LMST03020091	25-hydroxy-16,17,23,23,24,24-hexadehydrovitaminD3/25-hydroxy-16,17,23,23,24,24-hexadehydrocholecalciferol	Sterol_Lipids	-10.4	1	2	94
1055	LMST03020100	25-hydroxy-16,17,23,24-tetradehydrovitaminD3/25-hydroxy-16,17,23,24-tetradehydrocholecalciferol	Sterol_Lipids	-10.4	0	2	103
1056	LMST03020126	(5E)-(24R)-24,25-dihydroxy-[6,19,19-trideutrio]vitaminD3/(5E)-(24R)-24,25-dihydroxy-[6,19,19-trideutrio]cholecalciferol	Sterol_Lipids	-10.4	0	2	94
1057	LMST03020129	(20R,24S)-20-fluoro-1alpha,24-dihydroxy-26,27-cyclovitaminD3/(20R,24S)-20-fluoro-1alpha,24-dihydroxy-26,27-cyclocholecalciferol	Sterol_Lipids	-10.4	1	1	103
1058	LMST03020131	26,26,26-trifluoro-25-hydroxyvitaminD3	Sterol_Lipids	-10.4	0	1	100
1059	LMST03020150	(22Z)-1alpha-hydroxy-22,23-didehydrovitaminD3/(22Z)-1alpha-hydroxy-22,23-didehydrocholecalciferol	Sterol_Lipids	-10.4	1	0	102
1060	LMST03020155	25-hydroxy-16,17-didehydrovitaminD3/25-hydroxy-16,17-didehydrocholecalciferol	Sterol_Lipids	-10.4	0	1	99
1061	LMST03020176	(17S,20S)-1alpha,25-dihydroxy-17,20-methano-21-norvitaminD3/(17S,20S)-1alpha,25-dihydroxy-17,20-methano-21-norcholecalciferol	Sterol_Lipids	-10.4	0	4	104
1062	LMST03020177	(17S,20R)-1alpha,25-dihydroxy-17,20-methano-21-norvitaminD3/(17S,20R)-1alpha,25-dihydroxy-17,20-methano-21-norcholecalciferol	Sterol_Lipids	-10.4	0	4	98
1063	LMST03020244	(24R)-24-hydroxyvitaminD3/(24R)-24-hydroxycholecalciferol	Sterol_Lipids	-10.4	0	2	90
1064	LMST03020245	(24S)-24-hydroxyvitaminD3/(24S)-24-hydroxycholecalciferol	Sterol_Lipids	-10.4	0	2	98
1065	LMST03020308	toxisterol3R1/6,19-dihydrovitaminD3/6,19-dihydrocholecalciferol	Sterol_Lipids	-10.4	0	2	104
1066	LMST03020319	25-hydroxy-24-methyl-23,24-didehydrovitaminD3/25-hydroxy-24-methyl-23,24-didehydrocholecalciferol	Sterol_Lipids	-10.4	0	2	95
1067	LMST03020335	(5E,10E)-19-methylvitaminD3/(5E,10E)-19-methylcholecalciferol	Sterol_Lipids	-10.4	0	2	100
1068	LMST03020562	1alpha,25-dihydroxy-3-deoxy-19-norvitaminD3/1alpha,25-dihydroxy-3-deoxy-19-norcholecalciferol	Sterol_Lipids	-10.4	1	1	89
1069	LMST03020583	(20S)-20-cyclopropyl-1alpha,25-dihydroxy-16,17-didehydro-21-norvitaminD3/(20S)-20-cyclopropyl-1alpha,25-dihydroxy-16,17-didehydro-21-norcholecalciferol	Sterol_Lipids	-10.4	1	1	114
1070	LMST03020605	calicoferolA	Sterol_Lipids	-10.4	0	0	84
1071	LMST03020622	ZK168281	Sterol_Lipids	-10.4	0	3	114
1072	LMST03020654	VitaminD3butyrate	Sterol_Lipids	-10.4	0	1	116
1073	LMST03020655	5,6-trans-25-HydroxyvitaminD3	Sterol_Lipids	-10.4	0	1	95
1074	LMST03020661	1alpha-Hydroxypregnacalciferol	Sterol_Lipids	-10.4	0	1	102
1075	LMST03020665	24-DehydroprevitaminD3	Sterol_Lipids	-10.4	0	3	97
1076	LMST04010169	-	Sterol_Lipids	-10.4	0	1	96
1077	LMST04010334	-	Sterol_Lipids	-10.4	0	1	78
1078	LMST04010385	-	Sterol_Lipids	-10.4	0	0	82
1079	LMST04030125	-	Sterol_Lipids	-10.4	0	3	108
1080	LMST04030219	(25S)-cholestenoicacid	Sterol_Lipids	-10.4	0	2	88
1081	LMST04030227	-	Sterol_Lipids	-10.4	2	0	100
1082	LMST04030247	7alpha,24S-Dihydroxy-3-oxocholest-4-en-26-oicacid	Sterol_Lipids	-10.4	0	1	90
1083	LMST05020023	5alpha-Dihydrotestosteronesulfate	Sterol_Lipids	-10.4	1	0	68
1084	LMST01040123	Stigmasterol	Sterols	-10.4	0	4	91
1085	LMST01040144	24-ethylideneIophenol	Sterols	-10.4	0	5	98
1086	LMST01040156	Baikalosterol	Sterols	-10.4	0	3	85
1087	LMST01040196	22S-hydroxyisofucosterol	Sterols	-10.4	0	2	88
1088	LMST01050015	24-ethyl-24-methyl-cholesterol	Sterols	-10.4	0	5	103
1089	LMST01050017	25-Methyl-24-isopropenyl-cholesterol	Sterols	-10.4	0	5	101
1090	LMST01060007	23-demethylgorgosterol	Sterols	-10.4	0	2	89
1091	LMST01070000	Furostaneskeleton	Sterols	-10.4	0	2	81
1092	LMST01080007	Sarsasapogenenin	Sterols	-10.4	0	2	79
1093	LMST01100008	cycloartenol	Sterols	-10.4	0	4	99
1094	LMST01130021	1beta-hydroxybufalin	Sterols	-10.4	0	5	78
1095	ZINC000000608024	Phenothrin	World_NOT_FDA	-10.4	0	0	54
1096	ZINC000000608172	Amodiaquine	World_NOT_FDA	-10.4	0	0	62
1097	ZINC000002526388	4&#39	World_NOT_FDA	-10.4	0	1	93
1098	ZINC000003875311	Zaltoprofen	World_NOT_FDA	-10.4	1	0	43
1099	ZINC000003875383	Cholesterol	World_NOT_FDA	-10.4	0	1	84
1100	ZINC000003875993	Quinestrol	World_NOT_FDA	-10.4	0	2	72
1101	ZINC000003919580	Formestane	World_NOT_FDA	-10.4	0	0	55
1102	ZINC000004097285	Beclomethasone	World_NOT_FDA	-10.4	0	1	86
1103	ZINC000004099050	EstradiolGlucuronideSulfate	World_NOT_FDA	-10.4	1	1	95
1104	ZINC000008551674	17a-Estradiol3-Glucuronide	World_NOT_FDA	-10.4	0	3	80
1105	ZINC000011616580	Kad-1229	World_NOT_FDA	-10.4	1	0	53
1106	ZINC000021981274	Hydroxynefazodone	World_NOT_FDA	-10.4	0	1	113
1107	ZINC000021983537		World_NOT_FDA	-10.4	0	1	60
1108	ZINC000021999791	Morniflumate	World_NOT_FDA	-10.4	1	0	65
1109	ZINC000022007371	Fluticasone17beta-CarboxylicAcid	World_NOT_FDA	-10.4	1	3	76
1110	ZINC000022060380	6&#39	World_NOT_FDA	-10.4	1	1	68
1111	ZINC000022060383	6&#39	World_NOT_FDA	-10.4	1	0	73
1112	ZINC000100005073	IndigoCarmine	World_NOT_FDA	-10.4	0	0	56
1113	ZINC000100038546	Trilostane	World_NOT_FDA	-10.4	0	0	63
1114	ZINC000100054527	4-Trans-Hydroxyglyburide	World_NOT_FDA	-10.4	1	1	122
1115	ZINC000000538065	nefazodone	FDA	-10.4	1	1	115
1116	ZINC000000601301	bhft	FDA	-10.4	1	0	59
1117	ZINC000000643138	nizoral	FDA	-10.4	2	3	104
1118	ZINC000000896560	granisetron	FDA	-10.4	0	1	56
1119	ZINC000000897085	mefloquine	FDA	-10.4	0	0	71
1120	ZINC000000897618		Metab	-10.4	1	2	91
1121	ZINC000000899790	5-deoxykievitone	Metab	-10.4	0	0	48
1122	ZINC000001624462	cyananin	Metab	-10.4	2	0	47
1123	ZINC000002384327	1-phenyl-4-(1-phenylethyl)tetralin	Metab	-10.4	0	2	62
1124	ZINC000003202703	cefaloridine	Metab	-10.4	3	0	67
1125	ZINC000003779067	berberine	Metab	-10.4	0	0	46
1126	ZINC000003801163	quinapril	FDA	-10.4	0	0	89
1127	ZINC000003831490	azulfidine	FDA	-10.4	0	1	67
1128	ZINC000003874199	menatetrenone	Metab	-10.4	0	2	109
1129	ZINC000003882036	kenalog	FDA	-10.4	0	0	77
1130	ZINC000004027519	nevskin	Metab	-10.4	0	5	75
1131	ZINC000004083873		Metab	-10.4	0	0	50
1132	ZINC000004096710		Metab	-10.4	0	3	85
1133	ZINC000004212854	topicort	FDA	-10.4	0	3	73
1134	ZINC000008584338	synanthic	Metab	-10.4	1	0	34
1135	ZINC000009133172	hydroxylansoprazole	Metab	-10.4	0	0	41
1136	ZINC000011616925	folotyn	FDA	-10.4	0	0	120
1137	ZINC000013374707		Metab	-10.4	0	1	78
1138	ZINC000013559434	omeprazolesulfone	Metab	-10.4	0	0	44
1139	ZINC000013838494	piperoleinb	Metab	-10.4	0	0	54
1140	ZINC000013911941	zemplar	FDA	-10.4	0	2	120
1141	ZINC000014658258	piperochromenoicacid	Metab	-10.4	0	0	57
1142	ZINC000014658375	piperundecalidine	Metab	-10.4	0	0	62
1143	ZINC000014762498	morachalconea	Metab	-10.4	1	0	43
1144	ZINC000014883346	dihydrophylloquinone	Metab	-10.4	0	0	111
1145	ZINC000014883348	dihydrophylloquinone	Metab	-10.4	0	0	119
1146	ZINC000014883350	dihydrophylloquinone	Metab	-10.4	0	0	114
1147	ZINC000014946303	cellulosetriacetate	Metab	-10.4	1	4	133
1148	ZINC000015263983	grifolin	Metab	-10.4	0	0	58
1149	ZINC000022060952	2-hydroxynevirapine	Metab	-10.4	0	0	49
1150	ZINC000028817821	barogenin	Metab	-10.4	1	1	97
1151	ZINC000033970417	stigmast-4-en-6beta-ol-3-one	Metab	-10.4	0	1	96
1152	ZINC000034944431	silandrin	Metab	-10.4	1	2	89
1153	ZINC000035328014	ibrutinib	FDA	-10.4	1	1	98
1154	ZINC000078938681		Metab	-10.4	2	5	95
1155	ZINC000095616599	terazosin	FDA	-10.4	0	0	63
1156	ZINC000248267900		Metab	-10.4	0	2	106
1157	ZINC000253477262		Metab	-10.4	0	1	65
1158	ZINC000253477263		Metab	-10.4	0	1	66
1159	ZINC000253497580		Metab	-10.4	0	3	108
1160	ZINC000253497582		Metab	-10.4	0	6	113
1161	ZINC000257487332		Metab	-10.4	0	1	84
1162	LMST01010012	24,25-epoxy-cholesterol	Chol, Sterols	-10.3	0	1	82
1163	LMST01010069	7-dehydrocholesterol	Chol, Sterols	-10.3	0	1	84
1164	LMST01010086	22R-hydroxycholesterol	Chol, Sterols	-10.3	0	2	83
1165	LMST01010095	22-dehydrocholesterol	Chol, Sterols	-10.3	0	4	82
1166	LMST01010137	-	Chol, Sterols	-10.3	0	2	84
1167	LMST01010138	-	Chol, Sterols	-10.3	0	2	87
1168	LMST01010195	ponasteroneA	Chol, Sterols	-10.3	1	2	103
1169	LMST01010226	-	Chol, Sterols	-10.3	0	3	81
1170	LMST01010272	7-oxo-cholestenone	Chol, Sterols	-10.3	0	2	75
1171	LMST01010282	22-methylenecholesterol	Chol, Sterols	-10.3	0	1	86
1172	LMST01010286	Cystosterol	Chol, Sterols	-10.3	0	1	84
1173	LMST01010364	7-dehydrocholesterol-d7	Chol, Sterols	-10.3	0	1	82
1174	LMST01010402	Pentalinonsterol	Chol, Sterols	-10.3	0	3	82
1175	LMST01010447	3beta,4beta-dihydroxycholest-23-one	Chol, Sterols	-10.3	0	1	96
1176	LMST01030130	Typhasterol	Erg, Sterols	-10.3	1	3	103
1177	LMST01030148	-	Erg, Sterols	-10.3	0	2	99
1178	LMST01031043	Durissimasterol	Erg, Sterols	-10.3	0	3	83
1179	LMST01031049	Occelasterol	Erg, Sterols	-10.3	0	4	75
1180	LMST01031108	-	Erg, Sterols	-10.3	0	3	84
1181	LMST01031124	6-deoxo-3-dehydroteasterone	Erg, Sterols	-10.3	1	3	94
1182	LMST02020044	Stenbolone	Steroids, Androgens, Sterol_Lipids	-10.3	0	0	60
1183	LMST02020071	-	Steroids, Androgens, Sterol_Lipids	-10.3	0	1	55
1184	LMST02020094	-	Steroids, Androgens, Sterol_Lipids	-10.3	0	1	52
1185	LMST02020112	17-hydroxy-androstan-1,3-dione	Steroids, Androgens, Sterol_Lipids	-10.3	0	0	63
1186	LMST02030000	Pregnaneskeleton	Steroids, Estrogens, Sterol_Lipids	-10.3	0	1	62
1187	LMST02030127	Lynestrenol	Steroids, Estrogens, Sterol_Lipids	-10.3	0	0	55
1188	LMST02030171	algestone	Steroids, Estrogens, Sterol_Lipids	-10.3	0	0	78
1189	LMST02030183	(20S)-17,20-dihydroxypregn-4-en-3-one	Steroids, Estrogens, Sterol_Lipids	-10.3	0	0	58
1190	LMST02030192	11-Dehydrocorticosterone	Steroids, Estrogens, Sterol_Lipids	-10.3	0	2	59
1191	LMST02010037	Quinestrol	Steroids, Sterol_Lipids	-10.3	0	6	88
1192	LMST02010040	Estradioldipropionate	Steroids, Sterol_Lipids	-10.3	3	2	80
1193	LMST01100038	GalaxaurolE	Sterol_Lipids	-10.3	0	7	110
1194	LMST03010010	(24RS)-28,28,28-trifluoro-25-hydroxyvitaminD2	Sterol_Lipids	-10.3	0	2	110
1195	LMST03010015	previtaminD2/preergocalciferol	Sterol_Lipids	-10.3	0	3	84
1196	LMST03010057	3-epidihydrotachysterol2/(5E)-(10S)-10,19-dihydro-3-epivitaminD2/(5E)-(10S)-10,19-dihydro-3-epiergocalciferol	Sterol_Lipids	-10.3	0	1	101
1197	LMST03020001	VitaminD3	Sterol_Lipids	-10.3	0	2	96
1198	LMST03020078	26,26,26,27,27,27-hexafluoro-1alpha,25-dihydroxy-16,17,23,23,24,24-hexadehydrovitaminD3/26,26,26,27,27,27-hexafluoro-1alpha,25-dihydroxy-16,17,23,23,24,24-hexadehydrocholecalciferol	Sterol_Lipids	-10.3	0	3	91
1199	LMST03020088	26,26,26,27,27,27-hexafluoro-1alpha,24-dihydroxyvitaminD3/26,26,26,27,27,27-hexafluoro-1alpha,24-dihydroxycholecalciferol	Sterol_Lipids	-10.3	0	3	97
1200	LMST03020109	(23E)-1alpha,25-dihydroxy-16,17,23,24-tetradehydrovitaminD3/(23E)-1alpha,25-dihydroxy-16,17,23,24-tetradehydrocholecalciferol	Sterol_Lipids	-10.3	1	2	107
1201	LMST03020115	(23R,25R)-25-hydroxyvitaminD326,23-lactone/(23R,25R)-25-hydroxycholecalciferol26,23-lactone	Sterol_Lipids	-10.3	0	2	102
1202	LMST03020136	1alpha,25-difluorovitaminD3/1alpha,25-difluorocholecalciferol	Sterol_Lipids	-10.3	0	1	102
1203	LMST03020140	23,23-difluoro-25-hydroxyvitaminD3/23,23-difluoro-25-hydroxycholecalciferol	Sterol_Lipids	-10.3	0	3	96
1204	LMST03020170	1alpha,25-dihydroxy-9,11-didehydrovitaminD3/1alpha,25-dihydroxy-9,11-didehydrocholecalciferol	Sterol_Lipids	-10.3	0	2	102
1205	LMST03020237	(5E)-1beta-hydroxyvitaminD3/(5E)-1beta-hydroxycholecalciferol	Sterol_Lipids	-10.3	1	3	100
1206	LMST03020295	(5E)-(25R)-1alpha,25,26-trihydroxyvitaminD3/(5E)-(25R)-1alpha,25,26-trihydroxycholecalciferol	Sterol_Lipids	-10.3	1	1	112
1207	LMST03020540	2alpha-methyl-1alpha,25-dihydroxyvitaminD3/2alpha-methyl-1alpha,25-dihydroxycholecalciferol	Sterol_Lipids	-10.3	0	0	105
1208	LMST03020546	1alpha,25-dihydroxy-19-nor-22-oxavitaminD3/1alpha,25-dihydroxy-19-nor-22-oxacholecalciferol	Sterol_Lipids	-10.3	0	0	85
1209	LMST03020608	1,25-Dihydroxy-24-oxo-16-ene-vitaminD3	Sterol_Lipids	-10.3	0	0	105
1210	LMST03020637	1-Fluoro-25-hydroxy-16-ene-23-yne-26,27-hexadeuterovitamin-D3	Sterol_Lipids	-10.3	0	2	79
1211	LMST03020643	VD2728	Sterol_Lipids	-10.3	1	1	109
1212	LMST03020648	3-epi-vitaminD3	Sterol_Lipids	-10.3	0	0	79
1213	LMST03020652	VitaminD3sulfoconjugate	Sterol_Lipids	-10.3	0	1	102
1214	LMST03020663	25-FluorovitaminD3	Sterol_Lipids	-10.3	0	1	95
1215	LMST03030005	3-epi-5,6-trans-25-HydroxyvitaminD3	Sterol_Lipids	-10.3	0	1	97
1216	LMST04010002	5alpha-Cholanoicacid	Sterol_Lipids	-10.3	0	0	72
1217	LMST04010133	-	Sterol_Lipids	-10.3	0	4	81
1218	LMST04010320	-	Sterol_Lipids	-10.3	0	2	67
1219	LMST04010323	-	Sterol_Lipids	-10.3	0	0	76
1220	LMST04010340	-	Sterol_Lipids	-10.3	0	0	84
1221	LMST04010341	-	Sterol_Lipids	-10.3	0	2	65
1222	LMST04030049	-	Sterol_Lipids	-10.3	0	2	80
1223	LMST04030072	Cholestenoicacid	Sterol_Lipids	-10.3	0	2	87
1224	LMST04030126	-	Sterol_Lipids	-10.3	0	2	84
1225	LMST04030133	-	Sterol_Lipids	-10.3	0	2	75
1226	LMST04030239	3beta-hydroxy-7-oxocholest-5-en-(25R)26-oicacid	Sterol_Lipids	-10.3	0	2	87
1227	LMST01040169	-	Sterols	-10.3	0	2	97
1228	LMST01040177	24-hydroperoxy-24-vinylcholesterol	Sterols	-10.3	0	2	107
1229	LMST01040183	TheonellasterolC	Sterols	-10.3	0	4	100
1230	ZINC000000013936	Liranaftate	World_NOT_FDA	-10.3	1	0	54
1231	ZINC000000014669	Ifenprodil	World_NOT_FDA	-10.3	0	0	47
1232	ZINC000000538285	Repirinast	World_NOT_FDA	-10.3	0	0	59
1233	ZINC000000601274	Astemizole	World_NOT_FDA	-10.3	0	2	108
1234	ZINC000000607861	Famprofazon	World_NOT_FDA	-10.3	0	0	70
1235	ZINC000001846283	Talinolol	World_NOT_FDA	-10.3	1	0	71
1236	ZINC000002005534	Phenothrin	World_NOT_FDA	-10.3	0	0	59
1237	ZINC000003779067	Berberine	World_NOT_FDA	-10.3	0	0	43
1238	ZINC000003784432	Trandolaprilat	World_NOT_FDA	-10.3	1	0	55
1239	ZINC000003830820	Etretinate	World_NOT_FDA	-10.3	0	0	62
1240	ZINC000003831329	K-Ject	World_NOT_FDA	-10.3	0	0	122
1241	ZINC000003871723	BayH4502	World_NOT_FDA	-10.3	1	1	57
1242	ZINC000003881408	DehydroepiandrosteroneAcetate	World_NOT_FDA	-10.3	0	0	58
1243	ZINC000003983936	Flumetasone	World_NOT_FDA	-10.3	0	1	80
1244	ZINC000004175569	Domperidone	World_NOT_FDA	-10.3	0	2	75
1245	ZINC000004212939	Diflucortolone	World_NOT_FDA	-10.3	1	2	76
1246	ZINC000004228238	Tetra-H-Folate	World_NOT_FDA	-10.3	2	0	86
1247	ZINC000004521924	Trans-VitaminD3	World_NOT_FDA	-10.3	0	4	83
1248	ZINC000004743888	M1a	World_NOT_FDA	-10.3	0	0	64
1249	ZINC000012484965	Alfacalcidol	World_NOT_FDA	-10.3	0	3	93
1250	ZINC000019362721	Eprazinone	World_NOT_FDA	-10.3	0	0	60
1251	ZINC000021981235	LansoprazoleSulfone	World_NOT_FDA	-10.3	0	0	41
1252	ZINC000100054519	4-Cis-HydroxycyclohexylGlyburide	World_NOT_FDA	-10.3	2	0	116
1253	ZINC000248065211		World_NOT_FDA	-10.3	0	0	74
1254	ZINC000000000973	avobenzone	FDA	-10.3	0	1	56
1255	ZINC000000057522	ting	FDA	-10.3	0	0	43
1256	ZINC000000236891	dimilin	Metab	-10.3	0	0	37
1257	ZINC000000839083	hydroxylansoprazole	Metab	-10.3	1	0	43
1258	ZINC000000899792	5-deoxykievitone	Metab	-10.3	0	0	42
1259	ZINC000000900047	silicaaerogel	Metab	-10.3	0	2	77
1260	ZINC000000968328	rosiglitazone	FDA	-10.3	0	0	49
1261	ZINC000000968330	rosiglitazone	FDA	-10.3	0	0	55
1262	ZINC000001530977	naftifine	FDA	-10.3	0	0	45
1263	ZINC000001634551		Metab	-10.3	0	5	72
1264	ZINC000001850376	nix	FDA	-10.3	0	0	61
1265	ZINC000002097389		Metab	-10.3	0	0	81
1266	ZINC000002097391		Metab	-10.3	0	0	73
1267	ZINC000002561256	medicagol	Metab	-10.3	0	1	39
1268	ZINC000002566160		Metab	-10.3	0	2	60
1269	ZINC000003818726	belinostat	FDA	-10.3	2	0	55
1270	ZINC000003833954	isopregnanolone	Metab	-10.3	0	0	64
1271	ZINC000003875393	tbz	FDA	-10.3	0	0	53
1272	ZINC000003875985	beta-tocopherol	Metab	-10.3	0	0	83
1273	ZINC000003938686	palbociclib	FDA	-10.3	0	2	107
1274	ZINC000004096712	stigmasterin	Metab	-10.3	0	4	106
1275	ZINC000004097440	asmanex	FDA	-10.3	0	2	91
1276	ZINC000004228266	methylfolate	Metab	-10.3	2	0	99
1277	ZINC000004228267	methylfolate	Metab	-10.3	2	0	98
1278	ZINC000004282168	tudcabil	Metab	-10.3	1	2	112
1279	ZINC000004288876	isoambrettolide	Metab	-10.3	0	0	50
1280	ZINC000008584337	synanthic	Metab	-10.3	1	0	39
1281	ZINC000008662733	prunetrin	Metab	-10.3	1	2	87
1282	ZINC000008844372	ononin?	Metab	-10.3	0	0	69
1283	ZINC000011679756	eltrombopag	FDA	-10.3	1	3	95
1284	ZINC000012494006	7-ketocholesterol	Metab	-10.3	0	2	81
1285	ZINC000013129998	meloxicam	FDA	-10.3	1	0	42
1286	ZINC000013335591	sageone	Metab	-10.3	0	0	61
1287	ZINC000013382496	3-isomangostin	Metab	-10.3	0	0	68
1288	ZINC000013449465	5-o-desmethyldonepezil	Metab	-10.3	0	0	58
1289	ZINC000014610079		Metab	-10.3	0	0	45
1290	ZINC000014642868	icosylpalmitate	Metab	-10.3	0	1	80
1291	ZINC000014762985	glicoricone	Metab	-10.3	0	1	64
1292	ZINC000014824027	nb-p-coumaroyltryptamine	Metab	-10.3	0	0	33
1293	ZINC000015253910	2',4',5,7-tetrahydroxy-5'-geranylflavanone	Metab	-10.3	0	1	81
1294	ZINC000017044426	isosilybin	Metab	-10.3	0	1	93
1295	ZINC000031318695	flupoxam	Metab	-10.3	0	0	72
1296	ZINC000039314945		Metab	-10.3	0	5	75
1297	ZINC000040164484		Metab	-10.3	0	1	69
1298	ZINC000043746983		Metab	-10.3	1	6	76
1299	ZINC000059200542		Metab	-10.3	0	0	94
1300	ZINC000070455474	daidzein7-o-glucuronide	Metab	-10.3	0	1	65
1301	ZINC000094566093	doxazosin	FDA	-10.3	1	1	91
1302	ZINC000100038173		Metab	-10.3	0	1	96
1303	ZINC000100060554	cholestenone	Metab	-10.3	0	0	77
1304	ZINC000118937140	isomangiferolicacid	Metab	-10.3	0	6	100
1305	ZINC000239432806		Metab	-10.3	0	5	74
1306	ZINC000253616140		Metab	-10.3	0	0	73
1307	ZINC000253616141		Metab	-10.3	0	0	74
1308	ZINC000256434199		Metab	-10.3	0	2	102
1309	ZINC000256497800		Metab	-10.3	1	1	67
1310	ChEBI_104237	4-PPBP	Agonists-Antagonists	-10.2	0	0	41
1311	LMST01010479	CertonardosterolF	Chol, Sterol_Lipids	-10.2	2	2	83
1312	LMST01010005	7-oxocholesterol(d7)	Chol, Sterols	-10.2	0	2	79
1313	LMST01010009	5,6beta-epoxy-cholesterol(d7)	Chol, Sterols	-10.2	1	2	87
1314	LMST01010049	7-oxo-cholesterol	Chol, Sterols	-10.2	0	2	79
1315	LMST01010081	Epicholesterol	Chol, Sterols	-10.2	0	2	88
1316	LMST01010136	-	Chol, Sterols	-10.2	0	4	82
1317	LMST01010139	Lophanol	Chol, Sterols	-10.2	0	3	91
1318	LMST01010205	5beta-cholestanone	Chol, Sterols	-10.2	0	2	73
1319	LMST01010207	4,4-dimethyl-5alpha-cholest-7-en-3beta-ol	Chol, Sterols	-10.2	0	2	94
1320	LMST01010236	-	Chol, Sterols	-10.2	0	4	79
1321	LMST01010270	15-ketocholestane	Chol, Sterols	-10.2	0	3	83
1322	LMST01010278	Cholesterol-5alpha-hydroperoxide	Chol, Sterols	-10.2	0	2	81
1323	LMST01010285	-	Chol, Sterols	-10.2	0	2	93
1324	LMST01010288	-	Chol, Sterols	-10.2	0	2	77
1325	LMST01010315	24-norcholesterol	Chol, Sterols	-10.2	0	3	79
1326	LMST01010361	22-iso-ecdysone	Chol, Sterols	-10.2	1	2	104
1327	LMST01031224	KlyflaccisteroidB	Erg, Sterol_Lipids	-10.2	0	2	97
1328	LMST01030101	Obtusifoliol	Erg, Sterols	-10.2	0	4	101
1329	LMST01030126	6-Deoxotyphasterol	Erg, Sterols	-10.2	0	2	97
1330	LMST01031059	-	Erg, Sterols	-10.2	2	4	108
1331	LMST01031096	StoloniferoneI	Erg, Sterols	-10.2	0	2	107
1332	LMST01031107	-	Erg, Sterols	-10.2	0	2	86
1333	LMST01031119	22S-hydroxy-24-methylene-cholesterol	Erg, Sterols	-10.2	0	2	85
1334	LMST01031157	-	Erg, Sterols	-10.2	1	4	97
1335	LMST01031159	CalvasterolA	Erg, Sterols	-10.2	1	3	95
1336	LMST02020013	Methandrostenolone	Steroids, Androgens, Sterol_Lipids	-10.2	0	2	58
1337	LMST02020042	5alpha-dihydrotesosterone	Steroids, Androgens, Sterol_Lipids	-10.2	0	1	62
1338	LMST02020087	11-Ketoetiocholanolone	Steroids, Androgens, Sterol_Lipids	-10.2	0	2	56
1339	LMST02020104	Epietiocholanolone	Steroids, Androgens, Sterol_Lipids	-10.2	0	0	64
1340	LMST02020110	1-testosterone	Steroids, Androgens, Sterol_Lipids	-10.2	0	0	61
1341	LMST05010064	Dehydroisoandrosterone3-glucuronide	Steroids, Androgens, Sterol_Lipids	-10.2	0	2	93
1342	LMST02030086	11-deoxycortisol	Steroids, Estrogens, Sterol_Lipids	-10.2	0	0	74
1343	LMST02030130	Allopregnanolone	Steroids, Estrogens, Sterol_Lipids	-10.2	0	2	63
1344	LMST02010042	19-norandrosterone	Steroids, Sterol_Lipids	-10.2	0	1	60
1345	LMST02010044	nandrolone	Steroids, Sterol_Lipids	-10.2	0	0	52
1346	LMST05010019	16alpha,17beta-Estriol17-(beta-D-glucuronide)	Steroids, Sterol_Lipids	-10.2	0	1	88
1347	LMST01060034	LobophysterolD	Sterol_Lipids	-10.2	2	3	108
1348	LMST03010011	(24R)-24-fluoro-1alpha,25-dihydroxyvitaminD2/(24R)-24-fluoro-1alpha,25-dihydroxyergocalciferol	Sterol_Lipids	-10.2	0	4	98
1349	LMST03010030	25-hydroxyvitaminD2/25-hydroxyergocalciferol	Sterol_Lipids	-10.2	1	3	99
1350	LMST03010043	5(E)-1alpha,25-dihydroxy-24-epivitaminD2/5(E)-1alpha,25-dihydroxy-24-epiergocalciferol	Sterol_Lipids	-10.2	0	0	97
1351	LMST03010047	5(E)-1beta,25-dihydroxy-24-epivitaminD2/5(E)-1beta,25-dihydroxy-24-epiergocalciferol	Sterol_Lipids	-10.2	1	1	103
1352	LMST03010058	1alpha-hydroxy-24-methylvitaminD2/1alpha-hydroxy-24-methylergocalciferol	Sterol_Lipids	-10.2	1	5	100
1353	LMST03010065	26,27-Dihomo-1alpha-hydroxyvitaminD2	Sterol_Lipids	-10.2	0	1	112
1354	LMST03010068	SuprasterolII	Sterol_Lipids	-10.2	0	4	93
1355	LMST03020024	26,26,26-trifluoro-25-hydroxy-27-norvitaminD3	Sterol_Lipids	-10.2	0	1	95
1356	LMST03020046	1alpha,25-dihydroxy-24-norvitaminD3/1alpha,25-dihydroxy-24-norcholecalciferol	Sterol_Lipids	-10.2	1	2	97
1357	LMST03020047	1alpha,25-dihydroxy-19-norprevitaminD3/1alpha,25-dihydroxy-19-norprecholecalciferol	Sterol_Lipids	-10.2	0	0	82
1358	LMST03020096	1alpha,25-dihydroxy-16,17,23,23,24,24-hexadehydrovitaminD3/1alpha,25-dihydroxy-16,17,23,23,24,24-hexadehydrocholecalciferol	Sterol_Lipids	-10.2	0	1	99
1359	LMST03020104	(22E)-25-hydroxy-24-oxo-22,23-didehydrovitaminD3/(22E)-25-hydroxy-24-oxo-22,23-didehydrocholecalciferol	Sterol_Lipids	-10.2	0	1	95
1360	LMST03020105	(22E)-(24R)-1alpha,24-dihydroxy-26,27-cyclo-22,23-didehydrovitaminD3/(22E)-(24R)-1alpha,24-dihydroxy-26,27-cyclo-22,23-didehydrocholecalciferol	Sterol_Lipids	-10.2	0	2	88
1361	LMST03020125	(23S,25S)-1alpha,25-dihydroxyvitaminD326,23-lactone/(23S,25S)-1alpha,25-dihydroxycholecalciferol26,23-lactone	Sterol_Lipids	-10.2	0	2	109
1362	LMST03020151	(22Z)-1beta-hydroxy-22,23-didehydrovitaminD3/(22Z)-1beta-hydroxy-22,23-didehydrocholecalciferol	Sterol_Lipids	-10.2	0	3	87
1363	LMST03020157	calicoferolE	Sterol_Lipids	-10.2	0	0	84
1364	LMST03020160	24,25-epoxy-1alpha-hydroxyvitaminD3/24,25-epoxy-1alpha-hydroxycholecalciferol	Sterol_Lipids	-10.2	0	2	97
1365	LMST03020231	1alpha-hydroxyvitaminD3/1alpha-hydroxycholecalciferol	Sterol_Lipids	-10.2	1	3	100
1366	LMST03020249	(6S)-6,19-epidioxy-6,19-dihydrovitaminD3/(6S)-6,19-epidioxy-6,19-dihydrocholecalciferol	Sterol_Lipids	-10.2	0	3	89
1367	LMST03020277	(6R)-6,19-epidioxy-1alpha-hydroxy-6,19-dihydrovitaminD3/(6R)-6,19-epidioxy-1alpha-hydroxy-6,19-dihydrocholecalciferol	Sterol_Lipids	-10.2	0	2	86
1368	LMST03020305	(6RS,24R)-24,25-dihydroxyvitaminD36,19-sulfurdioxideadduct/(6RS,24R)-24,25-dihydroxycholecalciferol6,19-sulfurdioxideadduct	Sterol_Lipids	-10.2	0	3	99
1369	LMST03020318	(22E)-(25S)-25-hydroxy-26-methyl-22,23-didehydrovitaminD3/(22E)-(25S)-25-hydroxy-26-methyl-22,23-didehydrocholecalciferol	Sterol_Lipids	-10.2	0	3	101
1370	LMST03020328	(24R)-25-fluoro-1alpha,24-dihydroxy-24-methylvitaminD3/(24R)-25-fluoro-1alpha,24-dihydroxy-24-methylcholecalciferol	Sterol_Lipids	-10.2	0	3	94
1371	LMST03020355	2alpha-methyl-20-epi-1alpha,25-dihydroxyvitaminD3/2alpha-methyl-20-epi-1alpha,25-dihydroxycholecalciferol	Sterol_Lipids	-10.2	0	2	101
1372	LMST03020366	1alpha,25-dihydroxy-24a-homovitaminD3/1alpha,25-dihydroxy-24a-homocholecalciferol	Sterol_Lipids	-10.2	0	3	117
1373	LMST03020565	25-dihydroxy-19-norvitaminD3/25-dihydroxy-19-norcholecalciferol	Sterol_Lipids	-10.2	0	2	90
1374	LMST03020626	1alpha,25-Dihydroxy-2alpha-(3-hydroxypropyl)vitaminD3	Sterol_Lipids	-10.2	2	3	127
1375	LMST03020629	1alpha,25-Dihydroxy-2Z-ethylidene-19-norvitaminD3	Sterol_Lipids	-10.2	0	1	105
1376	LMST03020659	1-HydroxyprevitaminD3diacetate	Sterol_Lipids	-10.2	0	3	111
1377	LMST03020666	1,24-Dihydroxy-25-fluorovitaminD3	Sterol_Lipids	-10.2	1	3	107
1378	LMST04010166	-	Sterol_Lipids	-10.2	0	2	86
1379	LMST04010171	-	Sterol_Lipids	-10.2	0	2	87
1380	LMST04010264	-	Sterol_Lipids	-10.2	0	1	70
1381	LMST04010265	-	Sterol_Lipids	-10.2	0	2	69
1382	LMST04010270	-	Sterol_Lipids	-10.2	0	2	85
1383	LMST04010321	-	Sterol_Lipids	-10.2	0	3	81
1384	LMST04010327	-	Sterol_Lipids	-10.2	0	3	70
1385	LMST04010393	-	Sterol_Lipids	-10.2	0	1	72
1386	LMST04010407	-	Sterol_Lipids	-10.2	0	2	81
1387	LMST04010433	-	Sterol_Lipids	-10.2	0	0	70
1388	LMST04030149	7alpha-hydroxy-3-oxocholest-4-en-27-oicacid	Sterol_Lipids	-10.2	0	1	83
1389	LMST04030235	7beta-hydroxy-cholestenoicacid	Sterol_Lipids	-10.2	1	3	80
1390	LMST04030242	7alpha-hydroxy-3-oxo-4-cholestenoicacid	Sterol_Lipids	-10.2	0	1	84
1391	LMST05020064	25-hydroxy-cholesterol3-sulfate	Sterol_Lipids	-10.2	2	3	101
1392	LMST01040167	Saringosterol	Sterols	-10.2	1	3	97
1393	LMST01040175	(20S,24S)-24-ethylthornasterol	Sterols	-10.2	0	2	103
1394	ZINC000000000391	Indoprofen	World_NOT_FDA	-10.2	0	0	37
1395	ZINC000000014551	Ifenprodil	World_NOT_FDA	-10.2	0	0	50
1396	ZINC000000016678	Zaltoprofen	World_NOT_FDA	-10.2	1	0	47
1397	ZINC000000125047	Cinchophen	World_NOT_FDA	-10.2	0	0	38
1398	ZINC000000537802	Glisolamide	World_NOT_FDA	-10.2	1	2	87
1399	ZINC000000537811	Halazepam	World_NOT_FDA	-10.2	0	2	55
1400	ZINC000000607900	Fominoben	World_NOT_FDA	-10.2	0	0	72
1401	ZINC000001544805	Urapidil	World_NOT_FDA	-10.2	0	0	50
1402	ZINC000001698105	Pipazetate	World_NOT_FDA	-10.2	1	0	67
1403	ZINC000001842745	Bemetizide	World_NOT_FDA	-10.2	0	0	66
1404	ZINC000001999256	Promestriene	World_NOT_FDA	-10.2	0	2	70
1405	ZINC000002036915	Aminopterin	World_NOT_FDA	-10.2	1	0	85
1406	ZINC000002572666		World_NOT_FDA	-10.2	1	2	88
1407	ZINC000003814360	Dht	World_NOT_FDA	-10.2	0	1	62
1408	ZINC000003814379		World_NOT_FDA	-10.2	0	0	50
1409	ZINC000003831331	K-Ject	World_NOT_FDA	-10.2	0	1	123
1410	ZINC000003873817	Nicergoline	World_NOT_FDA	-10.2	1	1	95
1411	ZINC000003875362	Fluprednisolone	World_NOT_FDA	-10.2	0	0	83
1412	ZINC000003875387	Drolban	World_NOT_FDA	-10.2	0	0	60
1413	ZINC000003915645	Simendan	World_NOT_FDA	-10.2	0	0	46
1414	ZINC000003938750	Canrenoate	World_NOT_FDA	-10.2	0	3	70
1415	ZINC000004217399	Ramiprilat	World_NOT_FDA	-10.2	1	0	61
1416	ZINC000004228266	MethylFolate	World_NOT_FDA	-10.2	0	1	86
1417	ZINC000006093393	5-Hydroxydantrolene	World_NOT_FDA	-10.2	1	0	39
1418	ZINC000009060429	Tenatoprazole	World_NOT_FDA	-10.2	0	0	56
1419	ZINC000011616579	Kad-1229	World_NOT_FDA	-10.2	1	0	65
1420	ZINC000012341529	Exisulind	World_NOT_FDA	-10.2	0	0	50
1421	ZINC000014952767	E-3174	World_NOT_FDA	-10.2	0	3	102
1422	ZINC000022033882	Eprazinone	World_NOT_FDA	-10.2	0	0	59
1423	ZINC000022058301	EletriptanN-Oxide	World_NOT_FDA	-10.2	0	0	78
1424	ZINC000053151228	Methysergide	World_NOT_FDA	-10.2	0	0	59
1425	ZINC000077319562	Trandolapril-D5Diketopiperazine	World_NOT_FDA	-10.2	0	2	84
1426	ZINC000095618861	BuspironeN-Oxide	World_NOT_FDA	-10.2	1	0	82
1427	ZINC000150374458		World_NOT_FDA	-10.2	1	2	92
1428	ZINC000000121541	mebendazole	FDA	-10.2	0	0	35
1429	ZINC000000622260		Metab	-10.2	0	0	61
1430	ZINC000000897089	mefloquine	FDA	-10.2	0	1	76
1431	ZINC000000899429	6-prenylnaringenin	Metab	-10.2	0	0	48
1432	ZINC000000899884	maackiain	Metab	-10.2	0	0	37
1433	ZINC000000900727	flumioxazin	Metab	-10.2	0	1	56
1434	ZINC000001531881	cubebin	Metab	-10.2	0	1	54
1435	ZINC000001620280	(-)-maackiain	Metab	-10.2	0	0	41
1436	ZINC000001620281	(-)-maackiain	Metab	-10.2	0	0	37
1437	ZINC000001669780	pbn	Metab	-10.2	0	0	39
1438	ZINC000001714287	piperanine	Metab	-10.2	0	0	47
1439	ZINC000001850213		Metab	-10.2	0	0	41
1440	ZINC000001850374	nix	FDA	-10.2	0	0	55
1441	ZINC000002005305	5-methyltetrahydrofolate	FDA	-10.2	1	1	97
1442	ZINC000002120337	16-pregnolone	Metab	-10.2	0	2	58
1443	ZINC000002392256	trifoliol	Metab	-10.2	0	0	29
1444	ZINC000002529828	8-geranyloxypsoralen	Metab	-10.2	0	1	60
1445	ZINC000003872931	avapro	FDA	-10.2	1	2	99
1446	ZINC000004042371	asacoumarinb	Metab	-10.2	0	1	72
1447	ZINC000004095893	taurolithocholate	Metab	-10.2	0	1	102
1448	ZINC000004098928	sesamolinol	Metab	-10.2	0	0	65
1449	ZINC000004099032	estramustine	FDA	-10.2	0	1	75
1450	ZINC000004102227	pregnanolonei	Metab	-10.2	0	1	66
1451	ZINC000004693575	omeprazole	FDA	-10.2	0	0	48
1452	ZINC000004787209		Metab	-10.2	0	1	52
1453	ZINC000005158948		Metab	-10.2	1	0	47
1454	ZINC000005273906	trp-phe	Metab	-10.2	0	0	64
1455	ZINC000005533363	asacoumarinb	Metab	-10.2	1	1	70
1456	ZINC000005758832	7-hydroxycholesterol	Metab	-10.2	0	3	97
1457	ZINC000005854353	luteone	Metab	-10.2	1	0	71
1458	ZINC000006393492	clionasterol	Metab	-10.2	0	2	89
1459	ZINC000008214693		Metab	-10.2	0	0	101
1460	ZINC000013434355		Metab	-10.2	1	0	63
1461	ZINC000013434357		Metab	-10.2	1	0	62
1462	ZINC000013570997	glycophymine	Metab	-10.2	0	0	34
1463	ZINC000013677763	nb-feruloyltryptamine	Metab	-10.2	0	0	45
1464	ZINC000014587260	marmin	Metab	-10.2	0	0	48
1465	ZINC000014610077		Metab	-10.2	1	0	57
1466	ZINC000014616102	ochratoxinc	Metab	-10.2	0	0	82
1467	ZINC000014655907	piericidina	Metab	-10.2	0	1	84
1468	ZINC000014687882	roquefortine	Metab	-10.2	0	3	73
1469	ZINC000018847051	y-baptigenin	Metab	-10.2	0	0	44
1470	ZINC000031318699	azimsulfuron	Metab	-10.2	1	0	92
1471	ZINC000035454640	genistein4'-o-glucuronide	Metab	-10.2	1	0	89
1472	ZINC000064261573		Metab	-10.2	0	0	101
1473	ZINC000070455478		Metab	-10.2	0	0	72
1474	ZINC000077312860	cis-resveratrol4'-o-glucuronide	Metab	-10.2	1	0	71
1475	ZINC000082077808		Metab	-10.2	0	1	70
1476	ZINC000085205451		FDA	-10.2	0	0	62
1477	ZINC000085510874		Metab	-10.2	0	0	84
1478	ZINC000090516648		Metab	-10.2	2	0	58
1479	ZINC000100022637	tpv	FDA	-10.2	1	3	137
1480	ZINC000118937099	7-oxo-b-sitosterol	Metab	-10.2	0	2	101
1481	ZINC000256497802		Metab	-10.2	1	1	67
1482	ZINC000256497803		Metab	-10.2	1	1	66
1483	ZINC000257416692		Metab	-10.2	0	4	99
1484	ZINC000257555539		Metab	-10.2	0	0	84
1485	CHEBI52615		Agonists-Antagonists	-10.1	0	2	83
1486	LMST01010018	25-hydroxy-cholesterol	Chol, Sterols	-10.1	0	1	86
1487	LMST01010094	-	Chol, Sterols	-10.1	0	3	91
1488	LMST01010112	CucurbitacinL	Chol, Sterols	-10.1	0	5	108
1489	LMST01010122	Cholesta-5,7-diene-1,3-diol	Chol, Sterols	-10.1	1	2	91
1490	LMST01010128	24S,25-dihydroxycholesterol	Chol, Sterols	-10.1	0	2	84
1491	LMST01010132	6,24S-dihydroxycholesterol	Chol, Sterols	-10.1	1	2	76
1492	LMST01010145	22S-hydroxycholesterol(d7)	Chol, Sterols	-10.1	0	1	85
1493	LMST01010146	25-hydroxy-cholesterol(d6)	Chol, Sterols	-10.1	0	3	88
1494	LMST01010147	27-hydroxy-cholesterol(d6)	Chol, Sterols	-10.1	0	0	93
1495	LMST01010183	2-deoxyecdysone22-phosphate	Chol, Sterols	-10.1	2	3	108
1496	LMST01010228	-	Chol, Sterols	-10.1	0	2	89
1497	LMST01010229	-	Chol, Sterols	-10.1	0	5	96
1498	LMST01010275	5alpha-hydroxycholesterol	Chol, Sterols	-10.1	0	2	75
1499	LMST01010287	26,27-bisnor-22-dehydro-cholesterol	Chol, Sterols	-10.1	0	1	76
1500	LMST01010308	16beta,20S-dihydroxycholestan-3-one	Chol, Sterols	-10.1	0	1	100
1501	LMST01010309	20S-Hydroxycholest-1-en-3,16-dione	Chol, Sterols	-10.1	0	2	95
1502	LMST01010330	-	Chol, Sterols	-10.1	0	2	86
1503	LMST01010448	cholesterylbeta-D-xyloside	Chol, Sterols	-10.1	1	4	146
1504	LMST01030127	6-Deoxocastasterone	Erg, Sterols	-10.1	0	2	107
1505	LMST01031016	campest-4-en-3beta-ol	Erg, Sterols	-10.1	0	3	85
1506	LMST01031035	Xestosterol	Erg, Sterols	-10.1	0	2	106
1507	LMST01031056	Sipalosterol	Erg, Sterols	-10.1	0	2	99
1508	LMST01031190	-	Erg, Sterols	-10.1	1	5	90
1509	LMST01031196	-	Erg, Sterols	-10.1	0	2	93
1510	LMST02020000	Androstraneskeleton	Steroids, Androgens, Sterol_Lipids	-10.1	0	0	60
1511	LMST02020001	Androsterone	Steroids, Androgens, Sterol_Lipids	-10.1	0	2	57
1512	LMST02020017	Bolasterone	Steroids, Androgens, Sterol_Lipids	-10.1	0	2	63
1513	LMST02020027	Mestanolone	Steroids, Androgens, Sterol_Lipids	-10.1	0	1	56
1514	LMST02020054	6beta-hydroxytestosterone	Steroids, Androgens, Sterol_Lipids	-10.1	0	0	60
1515	LMST02020056	-	Steroids, Androgens, Sterol_Lipids	-10.1	0	1	61
1516	LMST02020079	5alpha-androst-16-en-3-one	Steroids, Androgens, Sterol_Lipids	-10.1	0	1	53
1517	LMST02020086	11-Hydroxyandrosterone	Steroids, Androgens, Sterol_Lipids	-10.1	0	2	55
1518	LMST02020095	-	Steroids, Androgens, Sterol_Lipids	-10.1	0	0	57
1519	LMST05010004	3alpha-androstanediolglucuronide	Steroids, Androgens, Sterol_Lipids	-10.1	0	1	95
1520	LMST02030026	Aldosterone	Steroids, Estrogens, Sterol_Lipids	-10.1	1	1	74
1521	LMST03010007	1alpha,25-dihydroxy-24-oxo-23-azavitaminD2/1alpha,25-dihydroxy-24-oxo-23-azaergocalciferol	Sterol_Lipids	-10.1	0	3	103
1522	LMST03010040	1alpha,25-dihydroxyvitaminD2/1alpha,,25-dihydroxyergocalciferol	Sterol_Lipids	-10.1	0	2	93
1523	LMST03010041	1alpha,25-dihydroxy-24-epivitaminD2/1alpha,25-dihydroxy-24-epiergocalciferol	Sterol_Lipids	-10.1	0	2	100
1524	LMST03010053	1alpha,25,28-trihydroxyvitaminD2/1alpha,25,28-trihydroxyergocalciferol	Sterol_Lipids	-10.1	0	2	109
1525	LMST03010066	26,27-Dihomo-1alpha-hydroxy-24-epivitaminD2	Sterol_Lipids	-10.1	0	1	113
1526	LMST03020015	(22R)-22-hydroxy-24,25,26,27-tetranorvitaminD3/(22R)-22-hydroxy-24,25,26,27-tetranorcholecalciferol	Sterol_Lipids	-10.1	0	0	72
1527	LMST03020026	1alpha-hydroxy-21-nor-20-oxavitaminD3/1alpha-hydroxy-21-nor-20-oxacholecalciferol	Sterol_Lipids	-10.1	0	1	91
1528	LMST03020035	(17E)-1alpha,25-dihydroxy-17,20-didehydro-21-norvitaminD3/(17E)-1alpha,25-dihydroxy-17,20-didehydro-21-norcholecalciferol	Sterol_Lipids	-10.1	1	3	78
1529	LMST03020058	(24S)-1alpha,24-dihydroxy-22-oxavitaminD3/(24S)-1alpha,24-dihydroxy-22-oxacholecalciferol	Sterol_Lipids	-10.1	1	3	106
1530	LMST03020090	(23S)-26,26,26,27,27,27-hexafluoro-1alpha,23,25-trihydroxyvitaminD3/(23S)-26,26,26,27,27,27-hexafluoro-1alpha,23,25-trihydroxycholecalciferol	Sterol_Lipids	-10.1	1	2	95
1531	LMST03020097	9,14,19,19,19-pentadeuterio-1alpha,25-dihydroxyprevitaminD3/9,14,19,19,19-pentadeuterio-1alpha,25-dihydroxyprecholecalciferol	Sterol_Lipids	-10.1	0	1	96
1532	LMST03020098	(22E)-(25R)-26,26,26-trifluoro-1alpha,25-dihydroxy-22,23-didehydrovitaminD3/(22E)-(25R)-26,26,26-trifluoro-1alpha,25-dihydroxy-22,23-didehydrocholecalciferol	Sterol_Lipids	-10.1	1	3	111
1533	LMST03020121	(23S,25R)-25-hydroxyvitaminD326,23-peroxylactone/(23S,25R)-25-hydroxycholecalciferol26,23-peroxylactone	Sterol_Lipids	-10.1	0	3	92
1534	LMST03020127	(20R,24R)-20-fluoro-1alpha,24-dihydroxy-26,27-cyclovitaminD3/(20R,24R)-20-fluoro-1alpha,24-dihydroxy-26,27-cyclocholecalciferol	Sterol_Lipids	-10.1	0	2	100
1535	LMST03020133	(25S)-26,26,26-trifluoro-1alpha,25-dihydroxyvitaminD3/(25S)-26,26,26-trifluoro-1alpha,25-dihydroxycholecalciferol	Sterol_Lipids	-10.1	1	2	114
1536	LMST03020145	24,24-difluoro-1alpha,25-dihydroxyvitaminD3/24,24-difluoro-1alpha,25-dihydroxycholecalciferol	Sterol_Lipids	-10.1	0	3	98
1537	LMST03020156	23,24-didehydro-25-hydroxyvitaminD3/23,24-didehydro-25-hydroxycholecalciferol	Sterol_Lipids	-10.1	1	2	98
1538	LMST03020158	1-oxoprevitaminD3/1-oxoprecholecalciferol	Sterol_Lipids	-10.1	1	3	87
1539	LMST03020168	(22E)-(24R)-1alpha,24-dihydroxy-22,23-didehydrovitaminD3/(22E)-(24R)-1alpha,24-dihydroxy-22,23-didehydrocholecalciferol	Sterol_Lipids	-10.1	0	2	94
1540	LMST03020169	(22E)-(24S)-1alpha,24-dihydroxy-22,23-didehydrovitaminD3/(22E)-(24S)-1alpha,24-dihydroxy-22,23-didehydrocholecalciferol	Sterol_Lipids	-10.1	2	2	88
1541	LMST03020171	1alpha,25-dihydroxy-16,17-didehydrovitaminD3/1alpha,25-dihydroxy-16,17-didehydrocholecalciferol	Sterol_Lipids	-10.1	0	2	109
1542	LMST03020207	25-fluoro-1alpha-hydroxyvitaminD3/25-fluoro-1alpha-hydroxycholecalciferol	Sterol_Lipids	-10.1	1	2	110
1543	LMST03020255	22-ethyl-1alpha,22-dihydroxy-25,26,27-trinorvitaminD3/22-ethyl-1alpha,22-dihydroxy-25,26,27-trinorcholecalciferol	Sterol_Lipids	-10.1	0	1	90
1544	LMST03020256	(24R)-1alpha,24-dihydroxyvitaminD3/(24R)-1alpha,24-dihydroxycholecalciferol	Sterol_Lipids	-10.1	1	2	105
1545	LMST03020283	1alpha,25-dihydroxy-24a-homo-22-oxavitaminD3/1alpha,25-dihydroxy-24a-homo-22-oxacholecalciferol	Sterol_Lipids	-10.1	0	1	96
1546	LMST03020343	(22S)-25-hydroxy-22-methoxyvitaminD3/(22S)-25-hydroxy-22-methoxycholecalciferol	Sterol_Lipids	-10.1	0	2	105
1547	LMST03020482	(22E,24E)-1alpha,25-dihydroxy-26,27-dimethyl-22,23,24,24a-tetradehydro-24a,24b-dihomovitaminD3/(22E,24E)-1alpha,25-dihydroxy-26,27-dimethyl-22,23,24,24a-tetradehydro-24a,24b-dihomocholecalciferol	Sterol_Lipids	-10.1	1	4	128
1548	LMST03020545	1alpha,25-dihydroxy-26,26,26,27,27,27-hexafluoro-16,17,23,23,24,24-hexadehydro-19-norvitaminD3/1alpha,25-dihydroxy-26,26,26,27,27,27-hexafluoro-16,17,23,23,24,24-hexadehydro-19-norcholecalciferol	Sterol_Lipids	-10.1	0	3	104
1549	LMST03020563	1beta,25-dihydroxy-3-deoxy-19-norvitaminD3/1beta,25-dihydroxy-3-deoxy-19-norcholecalciferol	Sterol_Lipids	-10.1	0	3	91
1550	LMST03020564	25-dihydroxy-19-nor-3-epivitaminD3/25-dihydroxy-19-nor-3-epicholecalciferol	Sterol_Lipids	-10.1	0	1	96
1551	LMST03020650	1alpha-Hydroxy-2-methylene-19-nor-(20S)-bishomopregnacalciferol	Sterol_Lipids	-10.1	0	4	74
1552	LMST03020673	25-Hydroxy-6,19-dihydro-6,19-ethanovitaminD3	Sterol_Lipids	-10.1	3	5	112
1553	LMST03020675	1alpha,25-dihydroxy-2alpha-(3-hydroxypropoxy)vitaminD3	Sterol_Lipids	-10.1	1	1	134
1554	LMST04010018	-	Sterol_Lipids	-10.1	0	0	75
1555	LMST04010045	-	Sterol_Lipids	-10.1	0	0	82
1556	LMST04010054	-	Sterol_Lipids	-10.1	1	2	92
1557	LMST04010130	-	Sterol_Lipids	-10.1	0	1	75
1558	LMST04010205	-	Sterol_Lipids	-10.1	0	2	86
1559	LMST04010219	-	Sterol_Lipids	-10.1	0	1	81
1560	LMST04010233	-	Sterol_Lipids	-10.1	0	1	70
1561	LMST04010236	-	Sterol_Lipids	-10.1	0	2	72
1562	LMST04010240	-	Sterol_Lipids	-10.1	0	2	79
1563	LMST04010269	-	Sterol_Lipids	-10.1	0	3	72
1564	LMST04010363	-	Sterol_Lipids	-10.1	0	1	69
1565	LMST04010365	-	Sterol_Lipids	-10.1	0	2	67
1566	LMST04010399	-	Sterol_Lipids	-10.1	0	0	75
1567	LMST04010434	-	Sterol_Lipids	-10.1	0	1	91
1568	LMST04010437	-	Sterol_Lipids	-10.1	0	1	75
1569	LMST04030150	7alpha,12alpha-dihydroxy-3-oxocholest-4-en-27-oicacid	Sterol_Lipids	-10.1	0	2	85
1570	LMST04030209	3alpha,7alpha,16alpha,24R-Tetrahydroxy-5beta-cholestan-26-oicacid	Sterol_Lipids	-10.1	0	2	92
1571	LMST04030226	-	Sterol_Lipids	-10.1	2	0	106
1572	LMST04030238	3beta,5alpha,6beta-Trihydroxycholestan-(25R)26-oicacid	Sterol_Lipids	-10.1	1	3	92
1573	LMST04030243	7alpha,12alpha-dihydroxy-3-oxo-4-cholestenoicacid	Sterol_Lipids	-10.1	0	3	89
1574	LMST04030260	-	Sterol_Lipids	-10.1	0	2	82
1575	LMST05020013	26-hydroxycholesterol3-sulfate	Sterol_Lipids	-10.1	2	2	108
1576	LMST05030018	3beta-Hydroxy-7-oxochol-5-en-24-oyl-glycine	Sterol_Lipids	-10.1	2	2	79
1577	LMST05030020	N-(7alpha-Hydroxy-3-oxochol-4-en-24-oyl)-glycine	Sterol_Lipids	-10.1	0	1	82
1578	LMST01040126	Chondrillasterol	Sterols	-10.1	0	3	96
1579	LMST01040151	(3beta,24R,24'R)-fucosterolepoxide	Sterols	-10.1	0	2	96
1580	LMST01040265	Stigmastane-3,6-dione	Sterols	-10.1	0	1	96
1581	LMST01040277	12alpha-hydroxySitosterol	Sterols	-10.1	0	2	96
1582	LMST01050021	24E-propylidenecholesterol	Sterols	-10.1	0	5	98
1583	LMST01060008	A-norgorgostanol	Sterols	-10.1	1	6	105
1584	LMST01080040	Kammogenin	Sterols	-10.1	0	4	88
1585	LMST01080050	Episceptrumgenin	Sterols	-10.1	0	4	83
1586	LMST01110017	-	Sterols	-10.1	0	3	94
1587	LMST01140003	7-oxotyphasterol	Sterols	-10.1	1	1	95
1588	ZINC000000000589	Pelubiprofen	World_NOT_FDA	-10.1	1	0	46
1589	ZINC000000001682	Mepiprazole	World_NOT_FDA	-10.1	1	0	49
1590	ZINC000000538337	Sertindole	World_NOT_FDA	-10.1	0	2	71
1591	ZINC000000839083	Hydroxylansoprazole	World_NOT_FDA	-10.1	0	0	44
1592	ZINC000001481841		World_NOT_FDA	-10.1	0	0	65
1593	ZINC000002526389	5&#39	World_NOT_FDA	-10.1	2	3	94
1594	ZINC000002528509	4&#39	World_NOT_FDA	-10.1	1	1	92
1595	ZINC000002559943	Ifenprodil	World_NOT_FDA	-10.1	0	0	49
1596	ZINC000003814184	Benazeprilat	World_NOT_FDA	-10.1	0	0	79
1597	ZINC000003821675	Pa824	World_NOT_FDA	-10.1	3	1	50
1598	ZINC000003822702	Bilastine	World_NOT_FDA	-10.1	0	0	103
1599	ZINC000003833824	Aldocorten	World_NOT_FDA	-10.1	1	1	72
1600	ZINC000003842872	Fimasartan	World_NOT_FDA	-10.1	0	1	120
1601	ZINC000003975663	Merimepodib	World_NOT_FDA	-10.1	2	0	98
1602	ZINC000004095859	Tocopherol	World_NOT_FDA	-10.1	0	0	95
1603	ZINC000004213057	DromostanolonePropionate	World_NOT_FDA	-10.1	0	3	76
1604	ZINC000004214767		World_NOT_FDA	-10.1	0	2	63
1605	ZINC000004474571		World_NOT_FDA	-10.1	0	3	98
1606	ZINC000005138848		World_NOT_FDA	-10.1	0	0	77
1607	ZINC000006067916	TestosteroneSulfate	World_NOT_FDA	-10.1	0	1	63
1608	ZINC000006067936	17-Hydroxymethylethisterone	World_NOT_FDA	-10.1	0	2	60
1609	ZINC000009133172	Hydroxylansoprazole	World_NOT_FDA	-10.1	0	0	39
1610	ZINC000012461841	Gliclazide	World_NOT_FDA	-10.1	1	0	45
1611	ZINC000013537287	Desmethylastemizole	World_NOT_FDA	-10.1	0	4	108
1612	ZINC000019362722	Eprazinone	World_NOT_FDA	-10.1	0	0	67
1613	ZINC000019796082	Minaprine	World_NOT_FDA	-10.1	0	0	42
1614	ZINC000022033872	Eprazinone	World_NOT_FDA	-10.1	0	0	60
1615	ZINC000031291853	E2-3s-17s	World_NOT_FDA	-10.1	1	2	71
1616	ZINC000043131420	Fostamatinib	World_NOT_FDA	-10.1	1	1	124
1617	ZINC000043206271	Tafamidis	World_NOT_FDA	-10.1	0	0	31
1618	ZINC000000001219	coumestrol	Metab	-10.1	0	0	37
1619	ZINC000000537791	amaryl	FDA	-10.1	2	4	117
1620	ZINC000000537964	mefloquine	FDA	-10.1	0	0	80
1621	ZINC000000599734	lansoprazole	FDA	-10.1	0	0	36
1622	ZINC000000643114	indapamide	FDA	-10.1	1	1	63
1623	ZINC000000895662	phaseollidin	Metab	-10.1	0	0	61
1624	ZINC000000898340	rutamarin	Metab	-10.1	1	0	48
1625	ZINC000001530579	coreg	FDA	-10.1	0	1	82
1626	ZINC000001558484	rutamarin	Metab	-10.1	1	0	49
1627	ZINC000001587150	moschamine	Metab	-10.1	0	0	57
1628	ZINC000001620282	(-)-maackiain	Metab	-10.1	0	0	32
1629	ZINC000001711822	(+)-sugiol	Metab	-10.1	0	2	59
1630	ZINC000001711823	(+)-sugiol	Metab	-10.1	0	1	57
1631	ZINC000001711824	(+)-sugiol	Metab	-10.1	1	2	60
1632	ZINC000001853205	mavik	FDA	-10.1	1	0	81
1633	ZINC000002386791	cerebrosterin	Metab	-10.1	0	1	95
1634	ZINC000002585491		Metab	-10.1	0	2	61
1635	ZINC000003797541	zytiga	FDA	-10.1	0	3	67
1636	ZINC000003802417	entereg	FDA	-10.1	1	1	101
1637	ZINC000003813047	oxandrolone	FDA	-10.1	0	0	49
1638	ZINC000003833821	prdl	FDA	-10.1	0	0	78
1639	ZINC000003869369	h2pte	Metab	-10.1	2	0	47
1640	ZINC000003914813	tudca	Metab	-10.1	0	2	109
1641	ZINC000004098363	6-prenylnaringenin	Metab	-10.1	0	0	51
1642	ZINC000004654845	3-hexaprenyl-4-hydroxybenzoate	Metab	-10.1	1	3	152
1643	ZINC000004787206		Metab	-10.1	0	1	51
1644	ZINC000005167248	17-hydroxypregnenolonesulfate	Metab	-10.1	2	1	78
1645	ZINC000005273905	trp-phe	Metab	-10.1	1	0	84
1646	ZINC000005430812	rub	Metab	-10.1	0	0	72
1647	ZINC000005758784		Metab	-10.1	0	0	80
1648	ZINC000008844373	ononin?	Metab	-10.1	0	0	62
1649	ZINC000013334444		Metab	-10.1	1	0	36
1650	ZINC000013860547	uralenol	Metab	-10.1	0	0	60
1651	ZINC000014610081	(-)-moracinp	Metab	-10.1	0	1	43
1652	ZINC000014610083		Metab	-10.1	0	1	44
1653	ZINC000014612909	neogrifolin	Metab	-10.1	0	0	54
1654	ZINC000014642862	icosylpalmitate	Metab	-10.1	0	0	79
1655	ZINC000014642865	icosylpalmitate	Metab	-10.1	0	0	71
1656	ZINC000014689153	(s)-rutaretin	Metab	-10.1	0	0	42
1657	ZINC000014719992	methuyltanshinonate	Metab	-10.1	0	0	44
1658	ZINC000014947781	cubebin	Metab	-10.1	0	1	54
1659	ZINC000018516586	delavirdine	FDA	-10.1	0	2	85
1660	ZINC000022058370	equol7-o-glucuronide	Metab	-10.1	0	1	52
1661	ZINC000033816043	trans-resveratrol4'-o-glucuronide	Metab	-10.1	1	0	64
1662	ZINC000035780505		Metab	-10.1	0	0	47
1663	ZINC000045789238	naringenin-4'-o-glucuronide	Metab	-10.1	0	0	76
1664	ZINC000068202099	erismodegib	FDA	-10.1	0	3	106
1665	ZINC000085879707		Metab	-10.1	0	0	52
1666	ZINC000095620855	naringenin-4'-o-glucuronide	Metab	-10.1	0	0	77
1667	ZINC000100015048	dn-102	Metab, FDA	-10.1	0	1	109
1668	ZINC000100073786		FDA	-10.1	0	4	107
1669	ZINC000100074252	sofosbuvir	FDA	-10.1	0	0	99
1670	ZINC000100777501		Metab	-10.1	0	0	99
1671	ZINC000100822245	isosilybin	Metab	-10.1	0	2	78
1672	ZINC000100829409	zanthobisquinolone	Metab	-10.1	2	0	67
1673	ZINC000118937138	isomangiferolicacid	Metab	-10.1	0	6	97
1674	ZINC000248290294		Metab	-10.1	0	3	90
1675	ZINC000255250104		Metab	-10.1	0	3	79
1676	ZINC000256068536		Metab	-10.1	0	1	57
1677	ZINC000256497801		Metab	-10.1	1	2	66
1678	ZINC000257398171		Metab	-10.1	0	5	111
1679	ZINC000257536028		Metab	-10.1	0	4	76
