# Supplementary material for: Investigation of the Entry Pathway and Molecular Nature of σ1 Receptor Ligands
Source: Int J Mol Sci. 2023 Mar 28;24(7):6367. doi: 10.3390/ijms24076367 (PMC10094450; doi:10.3390/ijms24076367)
Supplement: Supplementary file 1 [file ijms-24-06367-s001.zip › Supplementary-Table-S2_VS-6DK1.xlsx]

## Sheet: 6DK1
	Database ID	Compound name	Category	Ecalc	HB	CL	Contacts				World_Not_FDA	Metab	FDA	ErgP	Sterols	Agonists-Antagonists	CholP	Sterol_Lipids	Steroids	Androgens	DeltaL	Estrogens
1	ZINC000008220551	solanidine	Metab	-13.2	0	0	66
2	ZINC000008234226	Smilagenin(isosarsapogenin)	Metab	-13.1	0	2	65
3	LMST03020116	(23R,25S)-25-hydroxyvitaminD326,23-lactone/(23R,25S)-25-hydroxycholecalciferol26,23-lactone	Sterol_Lipids	-13	0	0	75
4	LMST01080000	Spirostaneskeleton	Sterols	-13	0	1	72
5	LMST01080043	Epidiosgenin	Sterols	-13	0	0	77
6	LMST01080050	Episceptrumgenin	Sterols	-13	0	0	72
7	LMST01130063	BufogargarizinD	Sterols	-13	1	0	41
8	LMST01130066	BufogargarizinC	Sterols	-13	1	1	51
9	LMST03020600	2beta-chloro-1alpha,25-dihydroxyvitaminD3	Sterol_Lipids	-12.9	0	0	91
10	CID_9829526	Siramesine	Agonists-Antagonists	-12.8	0	2	88
11	ZINC000008234190	withanolideD	Metab	-12.8	1	1	85
12	ZINC000014880001	Dutasteride	World_NOT_FDA	-12.7	0	1	80
13	LMST01010394	Masticadienonicacid	Chol, Sterols	-12.6	1	3	100
14	LMST01010404	EndertiinA	Chol, Sterols	-12.6	1	2	90
15	LMST01010407	GanodecaloneB	Chol, Sterols	-12.6	1	2	80
16	LMST01031084	Dehydroconicasterol	Erg, Sterols	-12.6	0	0	83
17	LMST03020118	(22E)-(24R,25R)-25,26-epoxy-1alpha,24-dihydroxy-22,23-didehydrovitaminD3/(22E)-(24R,25R)-25,26-epoxy-1alpha,24-dihydroxy-22,23-didehydrocholecalciferol	Sterol_Lipids	-12.6	0	0	71
18	LMST01160004	Minabeolide-3	Sterols	-12.6	0	1	64
19	LMST01010257	5α,9α-epidioxy-cholesta-6,8(14)-dien-3β-ol	Chol, Sterols	-12.5	0	0	85
20	LMST03020117	(23S,25S)-25-hydroxyvitaminD326,23-lactone/(23S,25S)-25-hydroxycholecalciferol26,23-lactone	Sterol_Lipids	-12.5	0	0	78
21	LMST03020140	24,24-difluoro-25-hydroxyvitaminD3/24,24-difluoro-25-hydroxycholecalciferol	Sterol_Lipids	-12.5	0	0	67
22	LMST03030003	22-HydroxyVitaminD4	Sterol_Lipids	-12.5	0	0	66
23	LMST01110012	23,24-dihydro-calysterol	Sterols	-12.5	0	0	102
24	LMST01130068	BufogargarizinC	Sterols	-12.5	1	0	46
25	ZINC000004097376	stanozolol	Metab	-12.5	1	1	63
26	ZINC000044306907	WithanolideA	Metab	-12.5	0	2	77
27	LMST01010237	3-keto-4alpha-methyl-zymosterol	Chol, Sterols	-12.4	0	1	87
28	LMST01030109	24-methylcholesta-5,23E-dien-3β-ol	Erg, Sterols	-12.4	0	0	82
29	LMST01031083	Conicasterol	Erg, Sterols	-12.4	0	1	86
30	LMST03020141	4,4-difluoro-1alpha,25-dihydroxyvitaminD3/4,4-difluoro-1alpha,25-dihydroxycholecalciferol	Sterol_Lipids	-12.4	0	0	75
31	LMST03020390	(17Z)-1alpha,25-dihydroxy-26,27-dimethyl-17,20,22,22,23,23-hexadehydrovitaminD3/(17Z)-1alpha,25-dihydroxy-26,27-dimethyl-17,20,22,22,23,23-hexadehydrocholecalciferol	Sterol_Lipids	-12.4	0	0	67
32	LMST03020585	1alpha-hydroxy-18-(4-hydroxy-4-methylpentyloxy)-23,24,25,26,27-pentanorvitaminD3/1alpha-hydroxy-18-(4-hydroxy-4-methylpentyloxy)-23,24,25,26,27-pentanorcholecalciferol	Sterol_Lipids	-12.4	0	0	95
33	LMST01040155	5-Dehydro-avenasterol	Sterols	-12.4	0	1	94
34	LMST01160000	Withanolideskeleton	Sterols	-12.4	0	1	79
35	LMST01160002	Minabeolide-1	Sterols	-12.4	0	0	64
36	ZINC000006716957	Nilotinib	FDA	-12.4	3	1	100
37	LMST01010121	7-dehydro-desmosterol	Chol, Sterols	-12.3	0	0	75
38	LMST01031090	NorselicacidC	Erg, Sterols	-12.3	0	1	82
39	LMST03020077	26,26,26,27,27,27-hexafluoro-25-hydroxy-16,17,23,23,24,24-hexadehydrovitaminD3/26,26,26,27,27,27-hexafluoro-25-hydroxy-16,17,23,23,24,24-hexadehydrocholecalciferol	Sterol_Lipids	-12.3	0	0	68
40	LMST03020101	(23Z)-25-hydroxy-16,17,23,24-tetradehydrovitaminD3/(23Z)-25-hydroxy-16,17,23,24-tetradehydrocholecalciferol	Sterol_Lipids	-12.3	0	0	75
41	LMST04010331	-	Sterol_Lipids	-12.3	0	0	65
42	LMST01040144	24-ethylideneIophenol	Sterols	-12.3	0	3	102
43	LMST01060002	gorgostan-3β-ol	Sterols	-12.3	0	0	82
44	LMST01080100	AsparacemosoneD	Sterols	-12.3	0	0	58
45	LMST01130001	Bufalin	Sterols	-12.3	0	0	51
46	ZINC000224657532	Bictegravir	World_NOT_FDA	-12.3	1	1	52
47	ZINC000003784182	adapalene	FDA	-12.3	0	0	59
48	ZINC000038600322	3'-Hydroxystanazolol	Metab	-12.3	1	1	59
49	ZINC000261499149	5-Dehydroavenasterol	Metab	-12.3	0	0	72
50	LMST01010305	(24Z)-24,26-dimethyldesmosterol	Chol, Sterols	-12.2	0	0	102
51	LMST01030110	24-methylcholesta-5,24-dien-3β-ol	Erg, Sterols	-12.2	0	0	85
52	LMST03020188	(22E)-(24R)-1alpha,24,25-trihydroxy-22,23-didehydrovitaminD3/(22E)-(24R)-1alpha,24,25-trihydroxy-22,23-didehydrocholecalciferol	Sterol_Lipids	-12.2	0	2	77
53	LMST03060002	Carcinomedin	Sterol_Lipids	-12.2	0	0	89
54	LMST01060000	Gorgostaneskeleton	Sterols	-12.2	0	0	82
55	LMST01080002	(25R)-5beta-spirostan-1beta,3alpha-diol	Sterols	-12.2	0	0	80
56	LMST01110001	Calysterol	Sterols	-12.2	0	2	81
57	LMST01130014	11alpha-hydroxytelocinobufagin	Sterols	-12.2	0	0	53
58	LMST01130025	Telocinobufagin	Sterols	-12.2	0	0	51
59	LMST01130026	Gamabufotalin	Sterols	-12.2	0	0	55
60	LMST01130040	1β,3β,5β,14β,16β-pentahydroxy-bufa-20,22-dienolide	Sterols	-12.2	1	0	73
61	LMST01160005	Minabeolide-4	Sterols	-12.2	0	2	78
62	ZINC000003809191	Abiraterone	World_NOT_FDA	-12.2	2	0	68
63	ZINC000004098868	Cyclopamine	Metab	-12.2	0	3	71
64	ZINC000064033452	Lumacaftor	FDA	-12.2	2	2	76
65	ZINC000261499150	5-Dehydroavenasterol	Metab	-12.2	0	0	72
66	LMST01010016	Desmosterol	Chol, Sterols	-12.1	0	0	76
67	LMST01010090	Desmosterol(d6)	Chol, Sterols	-12.1	0	0	77
68	LMST01010167	3-dehydro-4-methylzymosterol	Chol, Sterols	-12.1	0	0	84
69	LMST01010168	Zymosterone	Chol, Sterols	-12.1	0	0	85
70	LMST01010206	5alpha-cholesta-7,24-dien-3beta-ol	Chol, Sterols	-12.1	0	1	78
71	LMST01010385	-	Chol, Sterols	-12.1	0	0	96
72	LMST01010468	7alpha-hydroxy-Desmosterol	Chol, Sterols	-12.1	0	0	80
73	LMST04030222	(25S)-delta(1,7)-dafachronicacid	DeltaL, Sterol_Lipids	-12.1	0	1	85
74	LMST04030223	3alpha-OH-Delta7-dafachronicacid	DeltaL, Sterol_Lipids	-12.1	0	1	83
75	LMST01030122	-	Erg, Sterols	-12.1	0	0	85
76	LMST01030135	5-dehydroepisterol	Erg, Sterols	-12.1	0	0	85
77	LMST01031015	ergosta-5,7,22,24(28)-tetraen-3beta-ol	Erg, Sterols	-12.1	0	0	55
78	LMST01031022	5-campestenone	Erg, Sterols	-12.1	0	0	86
79	LMST01031027	22-dihydroergosterol	Erg, Sterols	-12.1	0	0	90
80	LMST01031176	Ergosta-4,6,8(14),22E-tetraen-3-one	Erg, Sterols	-12.1	0	0	69
81	LMST03020035	(17E)-1alpha,25-dihydroxy-17,20-didehydro-21-norvitaminD3/(17E)-1alpha,25-dihydroxy-17,20-didehydro-21-norcholecalciferol	Sterol_Lipids	-12.1	0	0	89
82	LMST03020079	26,26,26,27,27,27-hexafluoro-25-hydroxy-23,23,24,24-tetradehydrovitaminD3/26,26,26,27,27,27-hexafluoro-25-hydroxy-23,23,24,24-tetradehydrocholecalciferol	Sterol_Lipids	-12.1	0	0	74
83	LMST03020081	(22E)-26,26,26,27,27,27-hexafluoro-25-hydroxy-22,23-didehydrovitaminD3/(22E)-26,26,26,27,27,27-hexafluoro-25-hydroxy-22,23-didehydrocholecalciferol	Sterol_Lipids	-12.1	0	0	70
84	LMST03020085	26,26,26,27,27,27-hexafluoro-1alphaa-hydroxyvitaminD3/26,26,26,27,27,27-hexafluoro-1alphaa-hydroxycholecalciferol	Sterol_Lipids	-12.1	0	0	80
85	LMST03020163	25-hydroxy-24-oxovitaminD3/25-hydroxy-24-oxocholecalciferol	Sterol_Lipids	-12.1	0	0	73
86	LMST03020545	1alpha,25-dihydroxy-19-nor-22-oxavitaminD3/1alpha,25-dihydroxy-19-nor-22-oxacholecalciferol	Sterol_Lipids	-12.1	0	1	77
87	LMST03020673	1alpha,23R,25S,26-TetrahydroxyvitaminD3	Sterol_Lipids	-12.1	0	0	76
88	LMST04030255	-	Sterol_Lipids	-12.1	0	1	98
89	LMST01060009	22S,23S-methylenecholesterol	Sterols	-12.1	0	0	88
90	LMST01130020	19-oxo-bufalin	Sterols	-12.1	1	0	60
91	LMST01130044	-	Sterols	-12.1	1	0	72
92	LMST01150013	Spirosolaneskeleton	Sterols	-12.1	0	1	72
93	LMST01160007	Minabeolide-6	Sterols	-12.1	0	3	73
94	ZINC000003881613	Nandrolonephenpropionate	World_NOT_FDA	-12.1	0	0	69
95	ZINC000004097376	Winstrol	World_NOT_FDA	-12.1	1	0	52
96	ZINC000004097812	avenasterol	Metab	-12.1	0	1	73
97	ZINC000248267900	beta-Sitosterolacetate	Metab	-12.1	0	0	90
98	LMST01010015	Cholestenone	Chol, DeltaL, Sterols	-12	0	0	83
99	LMST01010248	3-ketocholesterol	Chol, DeltaL, Sterols	-12	0	0	82
100	LMST01010066	Zymosterol	Chol, Sterols	-12	0	1	84
101	LMST01010200	(20R,22R)-20,22-dihydroxycholesterol	Chol, Sterols	-12	0	0	88
102	LMST01010207	4,4-dimethyl-5alpha-cholest-7-en-3beta-ol	Chol, Sterols	-12	0	2	89
103	LMST01010245	Cholesterylacetate	Chol, Sterols	-12	0	0	83
104	LMST01010272	7-oxo-cholestenone	Chol, Sterols	-12	0	0	83
105	LMST01010286	Cystosterol	Chol, Sterols	-12	0	0	77
106	LMST01010308	16beta,20S-dihydroxycholestan-3-one	Chol, Sterols	-12	1	0	89
107	LMST01010363	-	Chol, Sterols	-12	0	1	79
108	LMST01010406	GanodecaloneA	Chol, Sterols	-12	1	3	92
109	LMST01031224	KlyflaccisteroidB	Erg, Sterol_Lipids	-12	0	0	77
110	LMST01030099	Chalinasterol	Erg, Sterols	-12	0	0	81
111	LMST01031057	-	Erg, Sterols	-12	0	0	75
112	LMST01031058	Sarcosterol	Erg, Sterols	-12	1	0	75
113	LMST01031111	NebrosteroidI	Erg, Sterols	-12	0	0	89
114	LMST01031158	CraterolA	Erg, Sterols	-12	0	0	74
115	LMST01031162	3beta,4beta-dihydroxyergosta-24(28)-en-23-one	Erg, Sterols	-12	1	0	81
116	LMST01031178	-	Erg, Sterols	-12	0	0	87
117	LMST03010009	26,26,26,27,27,27-hexafluoro-25-hydroxyvitaminD2	Sterol_Lipids	-12	0	2	80
118	LMST03010068	SuprasterolII	Sterol_Lipids	-12	0	0	81
119	LMST03020115	(23R,25R)-25-hydroxyvitaminD326,23-lactone/(23R,25R)-25-hydroxycholecalciferol26,23-lactone	Sterol_Lipids	-12	0	0	73
120	LMST03020137	4,4-difluoro-1alpha-hydroxyvitaminD3/4,4-difluoro-1alpha-hydroxycholecalciferol	Sterol_Lipids	-12	0	0	80
121	LMST03020210	(24R)-25-fluoro-1alpha,24-dihydroxyvitaminD3/(24R)-25-fluoro-1alpha,24-dihydroxycholecalciferol	Sterol_Lipids	-12	0	0	65
122	LMST03020271	(23S)-23,25-dihydroxyvitaminD3/(23S)-23,25-dihydroxycholecalciferol	Sterol_Lipids	-12	0	0	76
123	LMST03020335	1alpha,25-dihydroxy-3alpha-methyl-3-deoxyvitaminD3/1alpha,25-dihydroxy-3alpha-methyl-3-deoxycholecalciferol	Sterol_Lipids	-12	0	0	77
124	LMST03060001	ProvitaminD7	Sterol_Lipids	-12	0	0	71
125	LMST05020012	26-hydroxycholesterol3-sulfate	Sterol_Lipids	-12	0	0	95
126	LMST01040196	22S-hydroxyisofucosterol	Sterols	-12	0	0	96
127	LMST01110004	(23R)-isocalysterol	Sterols	-12	0	2	92
128	LMST01130013	11alpha,19-dihydroxytelocinobufagin	Sterols	-12	2	0	63
129	LMST01130021	1beta-hydroxybufalin	Sterols	-12	0	0	57
130	LMST01130039	-	Sterols	-12	2	0	76
131	LMST01130067	-	Sterols	-12	3	0	48
132	LMST01150016	20-epi-Verazine	Sterols	-12	0	0	61
133	ZINC000036387179	11-deoxycorticosteronepivalate	World_NOT_FDA	-12	0	0	67
134	ZINC000004084618	Ergosterol	Metab	-12	1	0	74
135	ZINC000004097814	fucosterin	Metab	-12	0	1	77
136	ZINC000004641374	doxercalciferol	FDA	-12	2	1	78
137	ZINC000030729704	5-Dehydroavenasterol	Metab	-12	0	0	79
138	LMST02020074	Testosteronecypionate	Androgens, Steroids, Sterol_Lipids	-11.9	0	1	76
139	LMST01010058	3,5-cholestadien-7-one	Chol, Sterols	-11.9	0	0	91
140	LMST01010059	4,6-cholestadienone	Chol, Sterols	-11.9	0	0	85
141	LMST01010095	22-dehydrocholesterol	Chol, Sterols	-11.9	0	0	73
142	LMST01010133	24-oxocholesterol	Chol, Sterols	-11.9	0	0	86
143	LMST01010189	3beta-hydroxy-4alpha-methyl-5alpha-cholest-7-ene-4beta-carboxylicacid	Chol, Sterols	-11.9	0	1	98
144	LMST01010253	-	Chol, Sterols	-11.9	0	0	83
145	LMST01010271	3-oxo-7alpha-hydroxycholesterol	Chol, Sterols	-11.9	0	0	81
146	LMST01010289	-	Chol, Sterols	-11.9	0	1	80
147	LMST01010299	24-keto-25dehydrocholesterol	Chol, Sterols	-11.9	0	0	77
148	LMST01010337	NebrosteroidJ	Chol, Sterols	-11.9	0	0	80
149	LMST01010386	(24Z),26-hydroxydesmosterol	Chol, Sterols	-11.9	2	0	82
150	LMST01010395	(24E),26-hydroxydesmosterol	Chol, Sterols	-11.9	1	0	89
151	LMST01010405	EndertiinB	Chol, Sterols	-11.9	0	2	99
152	LMST04030221	(25S)-Delta(7)-dafachronicacid	DeltaL, Sterol_Lipids	-11.9	0	0	91
153	LMST01030096	22,23-dihydrobrassicasterol	Erg, Sterols	-11.9	0	0	88
154	LMST01030105	Fungisterol	Erg, Sterols	-11.9	0	1	89
155	LMST01030111	epicodisterol	Erg, Sterols	-11.9	0	0	89
156	LMST01030113	-	Erg, Sterols	-11.9	0	0	82
157	LMST01030115	Episterol	Erg, Sterols	-11.9	0	0	84
158	LMST01030118	-	Erg, Sterols	-11.9	0	0	82
159	LMST01030140	-	Erg, Sterols	-11.9	0	1	95
160	LMST01030145	-	Erg, Sterols	-11.9	0	0	82
161	LMST01031105	Chabrosterol	Erg, Sterols	-11.9	0	0	88
162	LMST01031106	-	Erg, Sterols	-11.9	1	0	84
163	LMST01031110	-	Erg, Sterols	-11.9	0	0	76
164	LMST01060036	KlyflaccisteroidD	Sterol_Lipids	-11.9	0	3	105
165	LMST03010058	1alpha-hydroxy-24-methylvitaminD2/1alpha-hydroxy-24-methylergocalciferol	Sterol_Lipids	-11.9	0	0	76
166	LMST03010062	(24S)-1alpha,24-dihydroxyvitaminD2/(24S)-1alpha,24-dihydroxyergocalciferol	Sterol_Lipids	-11.9	0	1	77
167	LMST03020024	26,26,26-trifluoro-25-hydroxy-27-norvitaminD3	Sterol_Lipids	-11.9	0	0	70
168	LMST03020134	(5Z)-4,4-difluorovitaminD3/(5Z)-4,4-difluorocholecalciferol	Sterol_Lipids	-11.9	0	0	69
169	LMST03020155	23,24-didehydro-25-hydroxyvitaminD3/23,24-didehydro-25-hydroxycholecalciferol	Sterol_Lipids	-11.9	0	0	67
170	LMST03020244	(24S)-24-hydroxyvitaminD3/(24S)-24-hydroxycholecalciferol	Sterol_Lipids	-11.9	0	0	68
171	LMST03020447	(22E,24E)-1alpha,25-dihydroxy-26,27-dimethyl-22,23,24,24a-tetradehydro-24a-homovitaminD3/(22E,24E)-1alpha,25-dihydroxy-26,27-dimethyl-22,23,24,24a-tetradehydro-24a-homocholecalciferol	Sterol_Lipids	-11.9	0	1	110
172	LMST03020582	(20S)-20-cyclopropyl-1alpha,25-dihydroxy-16,17-didehydro-21-norvitaminD3/(20S)-20-cyclopropyl-1alpha,25-dihydroxy-16,17-didehydro-21-norcholecalciferol	Sterol_Lipids	-11.9	0	0	102
173	LMST03020599	(23R)-1alpha-hydroxy-25,27-didehydrovitaminD326,23-lactone	Sterol_Lipids	-11.9	0	0	75
174	LMST04010364	-	Sterol_Lipids	-11.9	0	0	73
175	LMST04010390	-	Sterol_Lipids	-11.9	0	0	78
176	LMST04030123	-	Sterol_Lipids	-11.9	0	0	85
177	LMST04030220	(25S)-Delta(4)-dafachronicacid	Sterol_Lipids	-11.9	0	0	90
178	LMST04030239	3beta,7alpha-Dihydroxy-5-cholestenoicacid	Sterol_Lipids	-11.9	0	0	98
179	LMST01040249	beta-Sitostenone	Sterols	-11.9	0	0	79
180	LMST01060004	-	Sterols	-11.9	0	0	85
181	LMST01080040	Kammogenin	Sterols	-11.9	0	2	78
182	LMST01080063	Isonarthogenin	Sterols	-11.9	2	0	81
183	LMST01080096	AsparacemosoneB	Sterols	-11.9	1	1	78
184	LMST01110014	Glaucasterol	Sterols	-11.9	0	1	74
185	LMST01130000	Bufanolideskeleton	Sterols	-11.9	0	0	57
186	LMST01130012	19-hydroxytelocinobufagin	Sterols	-11.9	3	0	69
187	LMST01150004	Solasodine	Sterols	-11.9	1	1	73
188	ZINC000000601275	Talniflumate	World_NOT_FDA	-11.9	1	0	56
189	ZINC000003876078	Estradiol	World_NOT_FDA	-11.9	1	0	64
190	ZINC000003881345	EstradiolBenzoate	World_NOT_FDA	-11.9	1	0	61
191	ZINC000102249909	Doxercalciferol	World_NOT_FDA	-11.9	0	1	69
192	ZINC000001634550	mogoltadin	Metab	-11.9	1	0	58
193	ZINC000003022621	FarnesiferolA	Metab	-11.9	1	0	60
194	ZINC000003947419	mogoltadin	Metab	-11.9	1	0	60
195	ZINC000004027981	conferone	Metab	-11.9	2	0	42
196	ZINC000004028456	conferone	Metab	-11.9	2	0	43
197	ZINC000004097019	tetrahymanol	Metab	-11.9	1	7	77
198	ZINC000014449640	mogoltadin	Metab	-11.9	1	1	59
199	ZINC000040430143	olaparib	FDA	-11.9	0	0	67
200	ZINC000253497580	beta-Sitosterolacetate	Metab	-11.9	0	0	89
201	LMST01010005	7-oxocholesterol(d7)	Chol, Sterols	-11.8	0	0	80
202	LMST01010017	Lanosterol	Chol, Sterols	-11.8	0	3	85
203	LMST01010049	7-oxo-cholesterol	Chol, Sterols	-11.8	0	0	83
204	LMST01010097	-	Chol, Sterols	-11.8	0	0	81
205	LMST01010099	-	Chol, Sterols	-11.8	0	1	77
206	LMST01010174	5alpha-cholestanone	Chol, Sterols	-11.8	0	0	86
207	LMST01010208	4alpha-methyl-5alpha-cholest-7-en-3-one	Chol, Sterols	-11.8	0	2	88
208	LMST01010256	-	Chol, Sterols	-11.8	0	0	91
209	LMST01010281	-	Chol, Sterols	-11.8	0	0	84
210	LMST01010297	24-ketocholestanol	Chol, Sterols	-11.8	0	0	87
211	LMST01010350	5,20(22)-cholestadienol	Chol, Sterols	-11.8	0	0	77
212	LMST01010353	1,4-cholestadienone	Chol, Sterols	-11.8	0	0	85
213	LMST01010392	GanodericacidB	Chol, Sterols	-11.8	1	2	100
214	LMST04030218	(25S)-cholestenoicacid	DeltaL, Sterol_Lipids	-11.8	0	2	92
215	LMST04030224	3beta-OH-Delta7-dafachronicacid	DeltaL, Sterol_Lipids	-11.8	0	1	92
216	LMST04030225	-	DeltaL, Sterol_Lipids	-11.8	0	1	87
217	LMST01030100	-	Erg, Sterols	-11.8	0	2	88
218	LMST01030138	-	Erg, Sterols	-11.8	0	0	79
219	LMST01031177	25-hydroxy-ergosta-4,6,8(14),22E-tetraen-3-one	Erg, Sterols	-11.8	0	0	76
220	LMST02010037	Quinestrol	Steroids, Sterol_Lipids	-11.8	0	1	64
221	LMST03010007	1alpha,25-dihydroxy-24-oxo-23-azavitaminD2/1alpha,25-dihydroxy-24-oxo-23-azaergocalciferol	Sterol_Lipids	-11.8	0	0	81
222	LMST03010018	(5Z)-isovitaminD2/5,6-cis-isovitaminD2/(5Z)-isoergocalciferol/5,6-cis-isoergocalciferol	Sterol_Lipids	-11.8	0	0	75
223	LMST03010019	(5E)-isovitaminD2/(5E)-isoergocalciferol	Sterol_Lipids	-11.8	0	1	86
224	LMST03010039	-	Sterol_Lipids	-11.8	0	2	93
225	LMST03020080	26,26,26,27,27,27-hexafluoro-1alpha,25-dihydroxy-23,23,24,24-tetradehydrovitaminD3/26,26,26,27,27,27-hexafluoro-1alpha,25-dihydroxy-23,23,24,24-tetradehydrocholecalciferol	Sterol_Lipids	-11.8	0	2	80
226	LMST03020121	(23R,25R)-1alpha,25-dihydroxyvitaminD326,23-lactone/(23R,25R)-1alpha,25-dihydroxycholecalciferol26,23-lactone	Sterol_Lipids	-11.8	0	0	75
227	LMST03020144	24,24-difluoro-1alpha,25-dihydroxyvitaminD3/24,24-difluoro-1alpha,25-dihydroxycholecalciferol	Sterol_Lipids	-11.8	0	0	74
228	LMST03020147	(22E)-1alpha-hydroxy-22,23-didehydrovitaminD3/(22E)-1alpha-hydroxy-22,23-didehydrocholecalciferol	Sterol_Lipids	-11.8	0	0	55
229	LMST03020164	25-hydroxy-1-oxo-3-epiprevitaminD3/25-hydroxy-1-oxo-3-epiprecholecalciferol	Sterol_Lipids	-11.8	0	0	71
230	LMST03020171	1alpha,25-dihydroxy-22,23-didehydrovitaminD3/1alpha,25-dihydroxy-22,23-didehydrocholecalciferol	Sterol_Lipids	-11.8	0	0	86
231	LMST03020202	(5Z,10Z)-19-fluoro-1alpha-hydroxyvitamin-D3/(5Z,10Z)-19-fluoro-1alpha-hydroxycholecalciferol	Sterol_Lipids	-11.8	0	0	67
232	LMST03020243	(24R)-24-hydroxyvitaminD3/(24R)-24-hydroxycholecalciferol	Sterol_Lipids	-11.8	0	0	64
233	LMST03020269	(22S)-22,25-dihydroxyvitaminD3/(22S)-22,25-dihydroxycholecalciferol	Sterol_Lipids	-11.8	0	0	69
234	LMST03020274	(25R)-25,26-dihydroxyvitaminD3/(25R)-25,26-dihydroxycholecalciferol	Sterol_Lipids	-11.8	0	0	64
235	LMST03020297	(23S)-23,24,25-trihydroxyvitaminD3/(23S)-23,24,25-trihydroxycholecalciferol	Sterol_Lipids	-11.8	0	0	73
236	LMST03020352	2alpha-methyl-3-epi-1beta,25-dihydroxyvitaminD3/2alpha-methyl-3-epi-1beta,25-dihydroxycholecalciferol	Sterol_Lipids	-11.8	0	0	76
237	LMST03020619	1,25-Dihydroxy-20S-21-(3-hydroxy-3-methylbutyl)-23-yne-26,27-hexafluorovitaminD3	Sterol_Lipids	-11.8	0	0	62
238	LMST03020672	25-Hydroxy-6,19-dihydro-6,19-ethanovitaminD3	Sterol_Lipids	-11.8	0	0	78
239	LMST03040002	ProvitaminD5	Sterol_Lipids	-11.8	0	0	72
240	LMST04010259	-	Sterol_Lipids	-11.8	0	0	65
241	LMST04010341	-	Sterol_Lipids	-11.8	0	0	60
242	LMST04030126	-	Sterol_Lipids	-11.8	0	0	87
243	LMST04030170	7alpha,12alpha,24-trihydroxycholest-4-en-3-one	Sterol_Lipids	-11.8	0	0	95
244	LMST04030219	(25S)-dafachronicacid	Sterol_Lipids	-11.8	0	0	80
245	LMST04030260	-	Sterol_Lipids	-11.8	0	0	93
246	LMST05020016	3alpha,7alpha,12alpha-trihydroxy-5alpha-cholan-24-ylsulfate	Sterol_Lipids	-11.8	0	0	91
247	LMST01040136	Peposterol	Sterols	-11.8	0	0	73
248	LMST01040165	Axinyssasterol	Sterols	-11.8	0	0	77
249	LMST01040241	(5alpha,24(28)Z)-Stigmast-24(28)-en-3-one	Sterols	-11.8	0	1	74
250	LMST01060007	23-demethylgorgosterol	Sterols	-11.8	0	2	95
251	LMST01060010	(22R,23R)-methylenecholesterol	Sterols	-11.8	0	0	72
252	LMST01080093	9(11)-dehydroxyhecogenin	Sterols	-11.8	0	1	70
253	LMST01100001	24-methylene-cycloartanol	Sterols	-11.8	0	0	72
254	LMST01110015	-	Sterols	-11.8	0	1	73
255	LMST01130004	Hellebrigenin	Sterols	-11.8	2	0	57
256	LMST01130024	Desacetylbufotalin	Sterols	-11.8	1	1	60
257	LMST01160014	PhysalolactoneC	Sterols	-11.8	1	3	100
258	ZINC000000577115	Xaliproden	World_NOT_FDA	-11.8	0	0	39
259	ZINC000003875383	Cholesterol	World_NOT_FDA	-11.8	0	0	84
260	ZINC000003875993	Quinestrol	World_NOT_FDA	-11.8	1	1	65
261	ZINC000004097468	Testosterone	World_NOT_FDA	-11.8	0	1	75
262	ZINC000077269419	N-OxideAbirateroneSulfate	World_NOT_FDA	-11.8	2	1	85
263	ZINC000000538312	risperdal	FDA	-11.8	0	0	63
264	ZINC000000704422	(3'alpha,5'alpha,9'xi,10'beta)-O-(3-Hydroxy-7-drimen-11-yl)umbelliferone	Metab	-11.8	2	0	49
265	ZINC000000704424	feselol	Metab	-11.8	2	0	47
266	ZINC000001445635	(3'alpha,5'alpha,9'xi,10'beta)-O-(3-Hydroxy-7-drimen-11-yl)umbelliferone	Metab	-11.8	2	0	49
267	ZINC000002101853	Conferone	Metab	-11.8	2	0	41
268	ZINC000002146627	conferone	Metab	-11.8	2	0	45
269	ZINC000002187519	conferone	Metab	-11.8	2	0	43
270	ZINC000004073895	4,6-cholestadien-3-one	Metab	-11.8	0	0	66
271	ZINC000004081322	farnesiferola	Metab	-11.8	1	0	59
272	ZINC000004096448	Fecosterol	Metab	-11.8	0	0	65
273	ZINC000004491418	conferol	Metab	-11.8	3	0	49
274	ZINC000005761088	dehydroergosterol	Metab	-11.8	0	0	60
275	ZINC000013485697	(3'x,5'a,9'x,10'b)-O-(3-Hydroxy-6-oxo-7-drimen-11-yl)umbelliferone	Metab	-11.8	3	0	49
276	ZINC000020470285	FarnesiferolA	Metab	-11.8	1	0	59
277	ZINC000030729723	campest-4-en-3-one	Metab	-11.8	0	0	65
278	ZINC000030729814	(22alpha)-hydroxy-campest-4-en-3-one	Metab	-11.8	0	0	69
279	ZINC000033830297	Conferone	Metab	-11.8	2	0	44
280	ZINC000033949373	16b-oh-stanozolol	Metab	-11.8	2	0	65
281	ZINC000040164281	Coprocholicacid	Metab	-11.8	1	1	73
282	ZINC000144006246	(3'x,5'a,9'x,10'b)-O-(3-Hydroxy-6-oxo-7-drimen-11-yl)umbelliferone	Metab	-11.8	2	0	50
283	ZINC000238777009	(3'x,5'a,9'x,10'b)-O-(3-Hydroxy-6-oxo-7-drimen-11-yl)umbelliferone	Metab	-11.8	2	0	52
284	ZINC000248290294	Dihydrobrassicasterol	Metab	-11.8	0	0	69
285	ZINC000257531044	GanoderalA	Metab	-11.8	0	3	86
286	ZINC000257531045	GanoderalA	Metab	-11.8	0	4	82
287	ZINC000257536027	7-dehydrodesmosterol	Metab	-11.8	0	0	55
288	LMST05010055	Dehydroisoandrosterone3-glucuronide	Androgens, Steroids, Sterol_Lipids	-11.7	0	1	89
289	LMST01010001	Cholesterol	Chol, Sterols	-11.7	0	0	83
290	LMST01010003	4beta-hydroxy-cholesterol(d7)	Chol, Sterols	-11.7	0	0	83
291	LMST01010014	4beta-hydroxy-cholesterol	Chol, Sterols	-11.7	0	0	84
292	LMST01010069	7-dehydrocholesterol	Chol, Sterols	-11.7	0	0	82
293	LMST01010081	Epicholesterol	Chol, Sterols	-11.7	0	0	81
294	LMST01010092	24-hydroxy-cholesterol(d6)	Chol, Sterols	-11.7	0	0	87
295	LMST01010093	Cholesterol(d7)	Chol, Sterols	-11.7	0	0	82
296	LMST01010094	-	Chol, Sterols	-11.7	0	2	87
297	LMST01010122	Cholesta-5,7-diene-1,3-diol	Chol, Sterols	-11.7	0	0	87
298	LMST01010138	-	Chol, Sterols	-11.7	0	0	84
299	LMST01010141	-	Chol, Sterols	-11.7	0	0	85
300	LMST01010144	22R-hydroxycholesterol(d7)	Chol, Sterols	-11.7	0	0	81
301	LMST01010164	(24R)-24-hydroxycholesterol	Chol, Sterols	-11.7	0	0	86
302	LMST01010204	3beta-hydroxy-4beta-methyl-5alpha-cholest-7-ene-4alpha-carbaldehyde	Chol, Sterols	-11.7	0	3	86
303	LMST01010239	-	Chol, Sterols	-11.7	0	1	83
304	LMST01010243	-	Chol, Sterols	-11.7	0	0	82
305	LMST01010252	-	Chol, Sterols	-11.7	0	0	86
306	LMST01010300	24-keto-25dehydrocholestanol	Chol, Sterols	-11.7	0	0	78
307	LMST01010316	Patinosterol	Chol, Sterols	-11.7	0	0	85
308	LMST01010338	NebrosteroidK	Chol, Sterols	-11.7	0	0	90
309	LMST01010354	4beta-OH-7-DHC	Chol, Sterols	-11.7	1	0	71
310	LMST01010364	7-dehydrocholesterol-d7	Chol, Sterols	-11.7	0	0	82
311	LMST01010400	Micaceol	Chol, Sterols	-11.7	0	0	88
312	LMST01010402	Pentalinonsterol	Chol, Sterols	-11.7	0	1	75
313	LMST01010444	3beta,4beta-dihydroxycholesta-5-ene-23-one	Chol, Sterols	-11.7	0	0	82
314	LMST01010445	3beta,4beta-dihydroxycholest-7(8)-en-23-one	Chol, Sterols	-11.7	1	1	77
315	LMST04030217	(25R)-Delta(7)-dafachronicacid	DeltaL, Sterol_Lipids	-11.7	0	1	96
316	LMST01030000	Ergostaneskeleton	Erg, Sterols	-11.7	0	0	91
317	LMST01030001	Campestaneskeleton	Erg, Sterols	-11.7	0	0	87
318	LMST01030097	Campesterol	Erg, Sterols	-11.7	0	0	82
319	LMST01030102	Ergostanol	Erg, Sterols	-11.7	0	0	92
320	LMST01030119	-	Erg, Sterols	-11.7	0	1	86
321	LMST01030123	-	Erg, Sterols	-11.7	0	0	84
322	LMST01031055	Remeisterol	Erg, Sterols	-11.7	0	0	102
323	LMST01031107	-	Erg, Sterols	-11.7	0	0	89
324	LMST01031119	22S-hydroxy-24-methylene-cholesterol	Erg, Sterols	-11.7	0	0	84
325	LMST01060035	KlyflaccisteroidC	Sterol_Lipids	-11.7	0	2	106
326	LMST03010010	(24RS)-28,28,28-trifluoro-25-hydroxyvitaminD2	Sterol_Lipids	-11.7	0	1	66
327	LMST03010012	(24S)-24-fluoro-1alpha,25-dihydroxyvitaminD2/(24S)-24-fluoro-1alpha,25-dihydroxyergocalciferol	Sterol_Lipids	-11.7	0	1	67
328	LMST03010030	25-hydroxyvitaminD2/25-hydroxyergocalciferol	Sterol_Lipids	-11.7	0	0	66
329	LMST03010041	1alpha,25-dihydroxy-24-epivitaminD2/1alpha,25-dihydroxy-24-epiergocalciferol	Sterol_Lipids	-11.7	0	0	78
330	LMST03010050	(24R)-24,26-dihydroxyvitaminD2/(24R)-24,26-dihydroxyergocalciferol	Sterol_Lipids	-11.7	0	0	78
331	LMST03020076	1alpha,26,26,26,27,27,27-heptafluoro-25-hydroxy-16,17,23,23,24,24-hexadehydrovitaminD3/1alpha,26,26,26,27,27,27-heptafluoro-25-hydroxy-16,17,23,23,24,24-hexadehydrocholecalciferol	Sterol_Lipids	-11.7	0	3	85
332	LMST03020084	1alpha-fluoro-25-hydroxy-16,17,23,23,24,24-hexadehydrovitaminD3/1alpha-fluoro-25-hydroxy-16,17,23,23,24,24-hexadehydrocholecalciferol	Sterol_Lipids	-11.7	0	1	72
333	LMST03020086	26,26,26,27,27,27-hexafluoro-25-hydroxyvitaminD3/26,26,26,27,27,27-hexafluoro-25-hydroxycholecalciferol	Sterol_Lipids	-11.7	0	0	73
334	LMST03020088	26,26,26,27,27,27-hexafluoro-1alpha,24-dihydroxyvitaminD3/26,26,26,27,27,27-hexafluoro-1alpha,24-dihydroxycholecalciferol	Sterol_Lipids	-11.7	0	2	88
335	LMST03020091	25-hydroxy-16,17,23,23,24,24-hexadehydrovitaminD3/25-hydroxy-16,17,23,23,24,24-hexadehydrocholecalciferol	Sterol_Lipids	-11.7	0	1	66
336	LMST03020100	25-hydroxy-16,17,23,24-tetradehydrovitaminD3/25-hydroxy-16,17,23,24-tetradehydrocholecalciferol	Sterol_Lipids	-11.7	0	1	66
337	LMST03020110	(23Z)-1alpha,25-dihydroxy-16,17,23,24-tetradehydrovitaminD3/(23Z)-1alpha,25-dihydroxy-16,17,23,24-tetradehydrocholecalciferol	Sterol_Lipids	-11.7	0	0	92
338	LMST03020122	(23S,25R)-1alpha,25-dihydroxyvitaminD326,23-lactone/(23S,25R)-1alpha,25-dihydroxycholecalciferol26,23-lactone	Sterol_Lipids	-11.7	0	0	75
339	LMST03020123	(23R,25S)-1alpha,25-dihydroxyvitaminD326,23-lactone/(23R,25S)-1alpha,25-dihydroxycholecalciferol26,23-lactone	Sterol_Lipids	-11.7	0	0	85
340	LMST03020131	(25R)-26,26,26-trifluoro-1alpha,25-dihydroxyvitaminD3/(25R)-26,26,26-trifluoro-1alpha,25-dihydroxycholecalciferol	Sterol_Lipids	-11.7	0	0	75
341	LMST03020135	1alpha,25-difluorovitaminD3/1alpha,25-difluorocholecalciferol	Sterol_Lipids	-11.7	0	0	75
342	LMST03020136	24,24-difluoro-1alpha-hydroxyvitaminD3/24,24-difluoro-1alpha-hydroxycholecalciferol	Sterol_Lipids	-11.7	0	0	65
343	LMST03020145	(6RS)-6,19-epidioxy-24,24-difluoro-25-hydroxy-6,19-dihydrovitaminD3/(6RS)-6,19-epidioxy-24,24-difluoro-25-hydroxy-6,19-dihydrocholecalciferol	Sterol_Lipids	-11.7	0	0	82
344	LMST03020167	(22E)-(24R)-1alpha,24-dihydroxy-22,23-didehydrovitaminD3/(22E)-(24R)-1alpha,24-dihydroxy-22,23-didehydrocholecalciferol	Sterol_Lipids	-11.7	0	0	97
345	LMST03020193	(23R)-1alpha,23,25-trihydroxy-24-oxovitaminD3/(23R)-1alpha,23,25-trihydroxy-24-oxocholecalciferol	Sterol_Lipids	-11.7	0	0	75
346	LMST03020246	25-hydroxy-14-epivitaminD3/25-hydroxy-14-epicholecalciferol	Sterol_Lipids	-11.7	0	0	66
347	LMST03020312	calicoferolD	Sterol_Lipids	-11.7	0	0	92
348	LMST03020409	18-acetoxy-25-hydroxyvitaminD3/18-acetoxy-25-hydroxycholecalciferol	Sterol_Lipids	-11.7	0	0	97
349	LMST03020494	26,27-diethyl-1alpha,25-dihydroxy-20,21-methano-23-oxavitaminD3/26,27-diethyl-1alpha,25-dihydroxy-20,21-methano-23-oxacholecalciferol	Sterol_Lipids	-11.7	0	0	102
350	LMST03020602	2beta-methoxy-1alpha,25-dihydroxyvitaminD3	Sterol_Lipids	-11.7	0	0	90
351	LMST03020637	1alpha,24-Dihydroxy-22-ene-24-cyclopropylvitaminD3	Sterol_Lipids	-11.7	0	0	59
352	LMST03020638	16-Dehydroepicalcitriol	Sterol_Lipids	-11.7	0	1	98
353	LMST03020639	VD2716	Sterol_Lipids	-11.7	0	0	94
354	LMST03020658	1-HydroxyprevitaminD3diacetate	Sterol_Lipids	-11.7	0	0	60
355	LMST03020663	25-DehydrovitaminD3	Sterol_Lipids	-11.7	0	0	62
356	LMST03020665	1,24-Dihydroxy-25-fluorovitaminD3	Sterol_Lipids	-11.7	0	1	82
357	LMST03020667	1,25-Dihydroxy-23-oxo-vitaminD3	Sterol_Lipids	-11.7	0	0	67
358	LMST03030001	1,25-Dihydroxylumisterol(3)	Sterol_Lipids	-11.7	0	0	71
359	LMST03040004	VitaminD6	Sterol_Lipids	-11.7	0	0	88
360	LMST04010340	-	Sterol_Lipids	-11.7	0	0	64
361	LMST04010342	-	Sterol_Lipids	-11.7	0	0	63
362	LMST04010377	-	Sterol_Lipids	-11.7	0	0	64
363	LMST04030072	-	Sterol_Lipids	-11.7	0	1	92
364	LMST04030133	3alpha,7alpha,12alpha-trihydroxycholestane	Sterol_Lipids	-11.7	0	1	93
365	LMST04030242	7alpha,12alpha-dihydroxy-3-oxo-4-cholestenoicacid	Sterol_Lipids	-11.7	0	1	99
366	LMST04030257	-	Sterol_Lipids	-11.7	0	1	101
367	LMST01050016	25-Methyl-24-isopropenyl-22E-dehydrocholesterol	Sterols	-11.7	0	1	87
368	LMST01080032	Isorhodeasapogenin	Sterols	-11.7	0	0	76
369	LMST01100030	Cycloarta-23-ene-3beta,25-diol	Sterols	-11.7	0	0	83
370	LMST01110005	(24S)-isocalysterol	Sterols	-11.7	0	0	74
371	LMST01110013	Nicasterol	Sterols	-11.7	0	2	76
372	LMST01160023	ExodeconolideF	Sterols	-11.7	0	2	82
373	ZINC000004474571		World_NOT_FDA	-11.7	1	1	91
374	ZINC000008214421	Lufenuron	World_NOT_FDA	-11.7	0	0	46
375	ZINC000008618002		World_NOT_FDA	-11.7	1	2	84
376	ZINC000040165249		World_NOT_FDA	-11.7	2	1	85
377	ZINC000000704423	(3'alpha,5'alpha,9'xi,10'beta)-O-(3-Hydroxy-7-drimen-11-yl)umbelliferone	Metab	-11.7	2	0	49
378	ZINC000000899909	sojagol	Metab	-11.7	1	0	43
379	ZINC000001481956	paliperidone	FDA	-11.7	0	0	53
380	ZINC000001542113	vilazodone	FDA	-11.7	2	0	71
381	ZINC000003984116	Quinacridone	Metab	-11.7	0	0	35
382	ZINC000004080967	ligupersina	Metab	-11.7	2	0	51
383	ZINC000004214700	paliperidone	FDA	-11.7	0	0	60
384	ZINC000004491419	(3'alpha,5'alpha,9'xi,10'beta)-O-(3-Hydroxy-7-drimen-11-yl)umbelliferone	Metab	-11.7	2	0	50
385	ZINC000004731235	(3'alpha,5'alpha,9'xi,10'beta)-O-(3-Hydroxy-7-drimen-11-yl)umbelliferone	Metab	-11.7	2	0	50
386	ZINC000012494196	cholesterolsulfate	Metab	-11.7	0	0	93
387	ZINC000013512290	7alpha-Hydroxy-3-oxo-4-cholestenoate	Metab	-11.7	0	1	67
388	ZINC000040164282	Coprocholicacid	Metab	-11.7	1	1	71
389	ZINC000204073689	Vorapaxar	FDA	-11.7	0	0	100
390	ZINC000253609461	Dihydrobrassicasterol	Metab	-11.7	0	0	70
391	ZINC000257373529	Ganodermanondiol	Metab	-11.7	1	4	77
392	LMST01010006	7alpha-hydroxy-cholesterol(d7)	Chol, Sterols	-11.6	0	0	84
393	LMST01010013	7alpha-hydroxy-cholesterol	Chol, Sterols	-11.6	0	0	87
394	LMST01010089	Lathosterol	Chol, Sterols	-11.6	0	1	84
395	LMST01010247	Lumisterol3	Chol, Sterols	-11.6	0	0	83
396	LMST01010254	-	Chol, Sterols	-11.6	0	0	82
397	LMST01010288	-	Chol, Sterols	-11.6	0	0	69
398	LMST01010349	1-(5alpha)-cholestenone	Chol, Sterols	-11.6	0	0	85
399	LMST01010358	EnP(5,8)	Chol, Sterols	-11.6	0	0	85
400	LMST01010403	Pentalinonside	Chol, Sterols	-11.6	0	2	91
401	LMST01010463	7alpha,(25R)26-Dihydroxycholest-4-en-3-one	Chol, Sterols	-11.6	0	0	93
402	LMST01030095	Fecosterol	Erg, Sterols	-11.6	0	1	85
403	LMST01030104	-	Erg, Sterols	-11.6	0	0	81
404	LMST01030116	-	Erg, Sterols	-11.6	0	1	91
405	LMST01030144	-	Erg, Sterols	-11.6	0	0	72
406	LMST01031023	Dehydroergosterol	Erg, Sterols	-11.6	0	1	81
407	LMST01031037	Mutasterol	Erg, Sterols	-11.6	0	0	87
408	LMST01031046	Peridinosterol	Erg, Sterols	-11.6	0	1	78
409	LMST01031161	3beta,4beta-dihydroxyergosta-23-one	Erg, Sterols	-11.6	0	1	95
410	LMST01100034	GalaxaurolA	Sterol_Lipids	-11.6	0	5	100
411	LMST03010001	VitaminD2	Sterol_Lipids	-11.6	0	0	63
412	LMST03010008	26,26,26,27,27,27-hexafluoro-25-hydroxyvitaminD2	Sterol_Lipids	-11.6	0	1	93
413	LMST03010015	previtaminD2/preergocalciferol	Sterol_Lipids	-11.6	0	0	69
414	LMST03020036	(17Z)-1alpha,25-dihydroxy-17,20-didehydro-21-norvitaminD3/(17Z)-1alpha,25-dihydroxy-17,20-didehydro-21-norcholecalciferol	Sterol_Lipids	-11.6	0	0	62
415	LMST03020092	(22E)-1alpha-hydroxy-24-oxo-26,27-cyclo-22,23-didehydrovitaminD3/(22E)-1alpha-hydroxy-24-oxo-26,27-cyclo-22,23-didehydrocholecalciferol	Sterol_Lipids	-11.6	0	0	64
416	LMST03020208	1alpha-fluoro-25-hydrovitaminD3/1alpha-fluoro-25-hydrocholecalciferol	Sterol_Lipids	-11.6	0	0	66
417	LMST03020245	25-hydroxyvitaminD3/25-hydroxycholecalciferol/calcidiol	Sterol_Lipids	-11.6	0	0	63
418	LMST03020273	(24S)-24,25-dihydroxyvitaminD3/(24S)-24,25-dihydroxycholecalciferol	Sterol_Lipids	-11.6	0	0	70
419	LMST03020298	(23S,25R)-23,25,26-trihydroxyvitaminD3/(23S,25R)-23,25,26-trihydroxycholecalciferol	Sterol_Lipids	-11.6	0	0	73
420	LMST03020311	(22E,24E,26E)-1alpha,26b-dihydroxy-22,23,24,25,26,26a-hexadehydro-26a,26b-dihomo-27-norvitaminD3/(22E,24E,26E)-1alpha,26b-dihydroxy-22,23,24,25,26,26a-hexadehydro-26a,26b-dihomo-27-norcholecalciferol	Sterol_Lipids	-11.6	0	1	65
421	LMST03020314	(22S)-1alpha,22,25-trihydroxy-23,24-tetradehydro-24a-homo-20-epivitaminD3/(22S)-1alpha,22,25-trihydroxy-23,24-tetradehydro-24a-homo-20-epicholecalciferol	Sterol_Lipids	-11.6	0	0	93
422	LMST03020346	1alpha,25-dihydroxy-8(14)a-homovitaminD3/1alpha,25-dihydroxy-8(14)a-homocholecalciferol	Sterol_Lipids	-11.6	0	0	88
423	LMST03020366	(24R)-1alpha,25-dihydroxy-24-methylvitaminD3/(24R)-1alpha,25-dihydroxy-24-methylcholecalciferol	Sterol_Lipids	-11.6	0	0	98
424	LMST03020479	(17Z)-1alpha,25-dihydroxy-26,27-dimethyl-17,20,22,22,23,23-hexadehydro-24a,24b-dihomovitaminD3/(17Z)-1alpha,25-dihydroxy-26,27-dimethyl-17,20,22,22,23,23-hexadehydro-24a,24b-dihomocholecalciferol	Sterol_Lipids	-11.6	0	2	95
425	LMST03020677	22-HydroxyvitaminD3	Sterol_Lipids	-11.6	0	0	78
426	LMST04010326	-	Sterol_Lipids	-11.6	0	0	57
427	LMST04010329	-	Sterol_Lipids	-11.6	0	0	59
428	LMST04010361	-	Sterol_Lipids	-11.6	0	0	73
429	LMST04010382	-	Sterol_Lipids	-11.6	0	0	65
430	LMST04030149	7alpha,12alpha-dihydroxy-3-oxocholest-4-en-27-oicacid	Sterol_Lipids	-11.6	0	1	97
431	LMST04030175	(20R)-17alpha,20-dihydroxycholesterol	Sterol_Lipids	-11.6	0	0	88
432	LMST04030180	(25R)-3alpha,7alpha,12alpha-trihydroxy-5alpha-cholestan-26-oicacid	Sterol_Lipids	-11.6	0	0	94
433	LMST04030216	(25R)-Delta(4)-dafachronicacid	Sterol_Lipids	-11.6	0	0	90
434	LMST01020123	Sitosteryl3E-pentenoate	Sterols	-11.6	0	1	125
435	LMST01040139	-	Sterols	-11.6	0	2	88
436	LMST01040157	Fucostanol	Sterols	-11.6	0	0	82
437	LMST01040170	Sutinasterol	Sterols	-11.6	0	1	90
438	LMST01040180	Theonellasterol	Sterols	-11.6	0	2	98
439	LMST01040194	-	Sterols	-11.6	0	1	73
440	LMST01040262	poriferastane	Sterols	-11.6	0	0	86
441	LMST01050020	-	Sterols	-11.6	0	0	79
442	LMST01060001	Gorgosterol	Sterols	-11.6	0	0	81
443	LMST01080005	(25R)-5beta-spirostan-3beta-ol	Sterols	-11.6	0	0	73
444	LMST01080014	Hecogenin	Sterols	-11.6	0	1	75
445	LMST01080037	Diosgenin	Sterols	-11.6	0	0	71
446	LMST01080044	Epiruscogenin	Sterols	-11.6	0	1	74
447	LMST01080095	AsparacemosoneA	Sterols	-11.6	1	0	70
448	LMST01110008	24,26-cyclocholesterol	Sterols	-11.6	0	0	78
449	LMST01120000	Cardanolideskeleton	Sterols	-11.6	0	0	66
450	LMST01130060	BovogeninA	Sterols	-11.6	2	0	70
451	LMST01150002	soladulcidine	Sterols	-11.6	0	1	69
452	ZINC000000601274	Astemizole	World_NOT_FDA	-11.6	0	1	86
453	ZINC000001844627	Talniflumate	World_NOT_FDA	-11.6	0	0	65
454	ZINC000004084618		World_NOT_FDA	-11.6	0	0	79
455	ZINC000019203131	Biosone	World_NOT_FDA	-11.6	0	3	89
456	ZINC000101160855		World_NOT_FDA	-11.6	0	3	94
457	ZINC000253636802		World_NOT_FDA	-11.6	1	1	70
458	ZINC000001634344	isomahanine	Metab	-11.6	2	0	52
459	ZINC000001634551	Nevskin	Metab	-11.6	1	0	58
460	ZINC000003860715	derrin	Metab	-11.6	0	0	43
461	ZINC000013125765	semilicoisoflavoneb	Metab	-11.6	0	0	43
462	ZINC000013517910	glyceollidini	Metab	-11.6	1	0	48
463	ZINC000043746983	Nevskin	Metab	-11.6	1	0	55
464	ZINC000198521225	Isocolumbin	Metab	-11.6	2	0	35
465	ZINC000256078659	3-Hydroxystigmast-5-en-7-one	Metab	-11.6	0	0	76
466	ZINC000256427287	Clerosterol	Metab	-11.6	0	0	71
467	ZINC000257536028	7-dehydrodesmosterol	Metab	-11.6	0	0	68
468	LMST05010013	Etiocholan-3alpha-ol-17-one3-glucuronide	Androgens, Steroids, Sterol_Lipids	-11.5	0	2	84
469	LMST01010000	Cholestaneskeleton	Chol, Sterols	-11.5	0	0	83
470	LMST01010008	7beta-hydroxy-cholesterol(d7)	Chol, Sterols	-11.5	0	0	86
471	LMST01010019	24S-hydroxy-cholesterol	Chol, Sterols	-11.5	0	0	80
472	LMST01010054	22-hydroxycholesterol	Chol, Sterols	-11.5	0	0	87
473	LMST01010088	27-hydroxy-cholesterol(25R)	Chol, Sterols	-11.5	1	0	95
474	LMST01010100	Dormatinone	Chol, Sterols	-11.5	1	0	81
475	LMST01010176	14-demethyllanosterol	Chol, Sterols	-11.5	0	0	74
476	LMST01010202	4alpha-methylzymosterol	Chol, Sterols	-11.5	0	1	85
477	LMST01010282	22-methylenecholesterol	Chol, Sterols	-11.5	0	0	79
478	LMST01010301	22,23-epoxycampesterol	Chol, Sterols	-11.5	0	2	90
479	LMST01010313	19-norcholestenone	Chol, Sterols	-11.5	0	0	80
480	LMST01010345	22S-hydroxycholesterol	Chol, Sterols	-11.5	0	0	89
481	LMST01010355	4alpha-OH-7-DHC	Chol, Sterols	-11.5	0	0	68
482	LMST01010356	24S-OH-7-DHC	Chol, Sterols	-11.5	0	0	67
483	LMST01010387	22-oxocholesterol	Chol, Sterols	-11.5	0	0	82
484	LMST01010412	-	Chol, Sterols	-11.5	0	1	89
485	LMST01010465	7alpha,(25S)26-Dihydroxycholest-4-en-3-one	Chol, Sterols	-11.5	1	0	93
486	LMST01040154	Delta7-Avenasterol	DeltaL, Sterols	-11.5	0	0	73
487	LMST01031215	-	Erg, Sterol_Lipids	-11.5	0	1	92
488	LMST01030093	Ergosterol	Erg, Sterols	-11.5	0	1	62
489	LMST01030108	-	Erg, Sterols	-11.5	0	0	89
490	LMST01030112	-	Erg, Sterols	-11.5	0	0	72
491	LMST01030117	stellasterol	Erg, Sterols	-11.5	0	0	72
492	LMST01030125	3-Dehydro-6-deoxoteasterone	Erg, Sterols	-11.5	0	1	81
493	LMST01030141	-	Erg, Sterols	-11.5	0	0	79
494	LMST01031043	Durissimasterol	Erg, Sterols	-11.5	0	1	87
495	LMST01031087	ConicasterolD	Erg, Sterols	-11.5	0	0	91
496	LMST01031116	-	Erg, Sterols	-11.5	0	1	95
497	LMST01031117	-	Erg, Sterols	-11.5	0	1	79
498	LMST01031120	3-epi-6-deoxocathasterone	Erg, Sterols	-11.5	0	0	81
499	LMST01031191	-	Erg, Sterols	-11.5	0	2	77
500	LMST01031192	-	Erg, Sterols	-11.5	0	2	71
501	LMST03010045	1beta,25-dihydroxy-24-epivitaminD2/1beta,25-dihydroxy-24-epiergocalciferol	Sterol_Lipids	-11.5	0	2	72
502	LMST03010059	1alpha,25-dihydroxy-24-methylvitaminD2/1alpha,25-dihydroxy-24-methylergocalciferol	Sterol_Lipids	-11.5	0	1	76
503	LMST03010069	Doxercalciferol	Sterol_Lipids	-11.5	0	0	77
504	LMST03020064	(20S)-1alpha,20,25-trihydroxy-24-norvitaminD3/(20S)-1alpha,20,25-trihydroxy-24-norcholecalciferol	Sterol_Lipids	-11.5	0	0	85
505	LMST03020087	6,19-epidioxy-26,26,26,27,27,27-hexafluoro-25-hydroxy-6,19-dihydrovitaminD3/6,19-epidioxy-26,26,26,27,27,27-hexafluoro-25-hydroxy-6,19-dihydrocholecalciferol	Sterol_Lipids	-11.5	0	1	78
506	LMST03020130	26,26,26-trifluoro-25-hydroxyvitaminD3	Sterol_Lipids	-11.5	0	0	90
507	LMST03020154	25-hydroxy-16,17-didehydrovitaminD3/25-hydroxy-16,17-didehydrocholecalciferol	Sterol_Lipids	-11.5	0	0	67
508	LMST03020162	25-hydroxy-23-oxovitaminD3/25-hydroxy-23-oxocholecalciferol	Sterol_Lipids	-11.5	0	0	69
509	LMST03020187	(23S,25R)-25-hydroxyvitaminD326,23-lactol/(23S,25R)-25-hydroxycholecalciferol26,23-lactol	Sterol_Lipids	-11.5	0	0	64
510	LMST03020195	2alpha-chloro-1beta,25-dihydroxyvitaminD3/2alpha-chloro-1beta,25-dihydroxycholecalciferol	Sterol_Lipids	-11.5	0	0	100
511	LMST03020197	(10Z)-19-fluorovitaminD3/(10Z)-19-fluorocholecalciferol	Sterol_Lipids	-11.5	0	0	89
512	LMST03020270	(23R)-23,25-dihydroxyvitaminD3/(23R)-23,25-dihydroxycholecalciferol	Sterol_Lipids	-11.5	0	0	74
513	LMST03020292	(24S)-1alpha,24,25-trihydroxyvitaminD3/(24S)-1alpha,24,25-trihydroxycholecalciferol	Sterol_Lipids	-11.5	0	0	100
514	LMST03020331	6-methylprevitaminD3/6-methylprecholecalciferol	Sterol_Lipids	-11.5	0	0	66
515	LMST03020367	1alpha,25-dihydroxy-24a-homo-20-epivitaminD3/1alpha,25-dihydroxy-24a-homo-20-epicholecalciferol	Sterol_Lipids	-11.5	0	0	93
516	LMST03020403	18-acetoxy-vitaminD3/18-acetoxy-cholecalciferol	Sterol_Lipids	-11.5	0	0	82
517	LMST03020534	1alpha,25-dihydroxy-11-(4-hydroxymethylphenyl)-9,11-didehydrovitaminD3/1alpha,25-dihydroxy-11-(4-hydroxymethylphenyl)-9,11-didehydrocholecalciferol	Sterol_Lipids	-11.5	0	1	147
518	LMST03020618	3-Deoxy-25-hydroxyvitaminD3	Sterol_Lipids	-11.5	0	0	61
519	LMST03020666	1alpha,25-DifluorovitaminD3	Sterol_Lipids	-11.5	0	0	73
520	LMST03020676	3-Deoxy-3-azido-25-hydroxyvitaminD3	Sterol_Lipids	-11.5	0	1	84
521	LMST03020678	2-Nor-1,3-seco-1alpha,25-dihydroxyvitaminD3	Sterol_Lipids	-11.5	0	0	60
522	LMST03050001	ProvitaminD6	Sterol_Lipids	-11.5	0	1	79
523	LMST03060003	KH1049	Sterol_Lipids	-11.5	0	0	89
524	LMST04010143	-	Sterol_Lipids	-11.5	0	0	73
525	LMST04010164	-	Sterol_Lipids	-11.5	0	0	76
526	LMST04010176	-	Sterol_Lipids	-11.5	0	0	77
527	LMST04010178	-	Sterol_Lipids	-11.5	0	0	77
528	LMST04010195	-	Sterol_Lipids	-11.5	0	0	78
529	LMST04010235	-	Sterol_Lipids	-11.5	0	0	71
530	LMST04010269	-	Sterol_Lipids	-11.5	0	0	59
531	LMST04010318	-	Sterol_Lipids	-11.5	0	0	68
532	LMST04010387	-	Sterol_Lipids	-11.5	0	0	70
533	LMST04030112	-	Sterol_Lipids	-11.5	0	0	78
534	LMST04030157	7alpha,12alpha,26-trihydroxycholest-4-en-3-one	Sterol_Lipids	-11.5	0	0	96
535	LMST04030241	7alpha-hydroxy-3-oxo-4-cholestenoicacid	Sterol_Lipids	-11.5	0	1	96
536	LMST05020013	pregnenolonesulfate	Sterol_Lipids	-11.5	0	0	101
537	LMST01040125	-	Sterols	-11.5	0	0	76
538	LMST01040131	-	Sterols	-11.5	0	0	83
539	LMST01040162	28-Isofucostanol	Sterols	-11.5	0	0	78
540	LMST01040245	5alpha-stigmastane	Sterols	-11.5	0	0	83
541	LMST01040255	fucosterol	Sterols	-11.5	0	1	74
542	LMST01040260	leucisterol	Sterols	-11.5	0	1	82
543	LMST01040264	stigmastane	Sterols	-11.5	0	0	83
544	LMST01050014	24-Isopropyl-cholesterol	Sterols	-11.5	0	1	92
545	LMST01080011	Yuccagenin	Sterols	-11.5	0	2	67
546	LMST01100002	cycloartanol	Sterols	-11.5	0	0	80
547	LMST01110011	23,24-dihydro-5alpha-calystanol	Sterols	-11.5	0	2	79
548	LMST01110018	-	Sterols	-11.5	0	0	75
549	LMST01120001	Digitoxigenin	Sterols	-11.5	0	0	57
550	LMST01130062	19-carboxy-19-demethyltelocinobufagin	Sterols	-11.5	2	0	61
551	ZINC000001542146	Pranlukast	World_NOT_FDA	-11.5	0	0	103
552	ZINC000008234384		World_NOT_FDA	-11.5	0	1	87
553	ZINC000013537287	Desmethylastemizole	World_NOT_FDA	-11.5	0	1	70
554	ZINC000017653974	Lufenuron	World_NOT_FDA	-11.5	0	0	43
555	ZINC000053073961	Antrafenine	World_NOT_FDA	-11.5	1	4	108
556	ZINC000001634347	(r)-mahanine	Metab	-11.5	2	0	52
557	ZINC000001727527	Norsanguinarine	Metab	-11.5	0	0	29
558	ZINC000001886965	mahanimbine	Metab	-11.5	1	0	49
559	ZINC000002559460	β-Sitosterol	Metab	-11.5	0	0	72
560	ZINC000003876073	desmosterol	Metab	-11.5	0	1	61
561	ZINC000004095893	taurolithocholate	Metab	-11.5	0	1	84
562	ZINC000004096817	estradiolglucuronide	Metab	-11.5	0	3	80
563	ZINC000005761341	campestanol	Metab	-11.5	0	1	68
564	ZINC000005845767	(r)-mahanine	Metab	-11.5	0	0	45
565	ZINC000014946303	cellulosetriacetate	Metab	-11.5	1	3	109
566	ZINC000036434727	LevistolideA	Metab	-11.5	1	0	69
567	ZINC000039314945	Nevskin	Metab	-11.5	1	0	55
568	ZINC000040164531	20a,22b-Dihydroxycholesterol	Metab	-11.5	1	0	78
569	ZINC000095618008	Fucosterol	Metab	-11.5	0	1	75
570	ZINC000095636507	Dihydrobrassicasterol	Metab	-11.5	0	0	62
571	ZINC000118912450	oxymetholone	FDA	-11.5	1	0	51
572	ZINC000239432806	Nevskin	Metab	-11.5	1	0	56
573	ZINC000254507524	Ergosterolperoxide	Metab	-11.5	0	1	70
574	ZINC000256403004	Isocolumbin	Metab	-11.5	2	1	34
575	ZINC000256518227	22-Dehydroclerosterol	Metab	-11.5	0	1	72
576	ZINC000256518822	22-Dehydroclerosterol	Metab	-11.5	0	2	72
577	ZINC000257491952	gamma-Taraxasterol	Metab	-11.5	0	3	82
578	ZINC000257536026	7-dehydrodesmosterol	Metab	-11.5	0	0	63
579	ZINC000257536029	7-dehydrodesmosterol	Metab	-11.5	0	0	57
580	LMST02020103	Dehydroandrosterone	Androgens, Steroids, Sterol_Lipids	-11.4	0	0	52
581	LMST05010064	5alpha-androstane-3alpha-ol-17-onesulfate	Androgens, Steroids, Sterol_Lipids	-11.4	0	0	77
582	LMST01010047	7beta-hydroxycholesterol	Chol, Sterols	-11.4	0	0	83
583	LMST01010077	Dihydrocholesterol	Chol, Sterols	-11.4	0	0	82
584	LMST01010140	-	Chol, Sterols	-11.4	0	0	82
585	LMST01010143	-	Chol, Sterols	-11.4	0	2	81
586	LMST01010145	22S-hydroxycholesterol(d7)	Chol, Sterols	-11.4	0	0	87
587	LMST01010149	4,4-dimethylcholesta-8,11,24-trienol	Chol, Sterols	-11.4	0	2	77
588	LMST01010175	3beta-hydroxy-4beta-methyl-5alpha-cholest-7-ene-4alpha-carboxylicacid	Chol, Sterols	-11.4	0	3	87
589	LMST01010205	5beta-cholestanone	Chol, Sterols	-11.4	0	0	83
590	LMST01010255	-	Chol, Sterols	-11.4	0	1	97
591	LMST01010287	26,27-bisnor-22-dehydro-cholesterol	Chol, Sterols	-11.4	0	0	58
592	LMST01010315	24-norcholesterol	Chol, Sterols	-11.4	0	0	69
593	LMST01010446	3beta,4beta-dihydroxycholest-8(9)-en-23-one	Chol, Sterols	-11.4	0	1	85
594	LMST01010447	3beta,4beta-dihydroxycholest-23-one	Chol, Sterols	-11.4	1	1	76
595	LMST01010462	7alpha,25(R)26-dihydroxycholesterol	Chol, Sterols	-11.4	1	0	93
596	LMST01030103	Campestanol	Erg, Sterols	-11.4	0	0	88
597	LMST01030147	-	Erg, Sterols	-11.4	0	3	92
598	LMST01031014	5alpha-ergosta-7,22-diene-3beta,5-diol	Erg, Sterols	-11.4	0	0	70
599	LMST01031051	4alpha-demethyldinosterol	Erg, Sterols	-11.4	0	2	89
600	LMST01031052	(22E,24R)-24,26-dimethylcholesta-5,22,25(27)-trien-3beta-ol	Erg, Sterols	-11.4	0	1	78
601	LMST01031124	6-deoxo-3-dehydroteasterone	Erg, Sterols	-11.4	0	1	98
602	LMST01031174	9,11-dehydroergosterolperoxide	Erg, Sterols	-11.4	0	0	82
603	LMST01060042	KlyflaccisteroidL	Sterol_Lipids	-11.4	0	2	94
604	LMST01100038	GalaxaurolE	Sterol_Lipids	-11.4	0	3	96
605	LMST03010067	7-Dehydrocholesterol-3-sulfateester	Sterol_Lipids	-11.4	0	0	92
606	LMST03020001	VitaminD3	Sterol_Lipids	-11.4	0	0	62
607	LMST03020089	26,26,26,27,27,27-hexafluoro-1alpha,25-dihydroxyvitaminD3/26,26,26,27,27,27-hexafluoro-1alpha,25-dihydroxycholecalciferol	Sterol_Lipids	-11.4	0	1	77
608	LMST03020103	1alpha-hydroxy-24-oxo-26,27-cyclovitaminD3/1alpha-hydroxy-24-oxo-26,27-cyclocholecalciferol	Sterol_Lipids	-11.4	0	0	72
609	LMST03020125	(5E)-(24R)-24,25-dihydroxy-[6,19,19-trideutrio]vitaminD3/(5E)-(24R)-24,25-dihydroxy-[6,19,19-trideutrio]cholecalciferol	Sterol_Lipids	-11.4	0	0	73
610	LMST03020127	(20S,24R)-20-fluoro-1alpha,24-dihydroxy-26,27-cyclovitaminD3/(20S,24R)-20-fluoro-1alpha,24-dihydroxy-26,27-cyclocholecalciferol	Sterol_Lipids	-11.4	0	0	87
611	LMST03020146	24,25-didehydrovitaminD3/24,25-didehydrocholecalciferol	Sterol_Lipids	-11.4	0	2	79
612	LMST03020153	1alpha,25-dihydroxy-9,11-didehydro-3-deoxyvitaminD3/1alpha,25-dihydroxy-9,11-didehydro-3-deoxycholecalciferol	Sterol_Lipids	-11.4	0	0	91
613	LMST03020194	(23S)-1alpha,23,25-trihydroxy-24-oxovitaminD3/(23S)-1alpha,23,25-trihydroxy-24-oxocholecalciferol	Sterol_Lipids	-11.4	0	0	74
614	LMST03020205	(5E,10E)-19-fluoro-1alpha-hydroxyvitamin-D3/(5E,10E)-19-fluoro-1alpha-hydroxycholecalciferol	Sterol_Lipids	-11.4	0	0	76
615	LMST03020221	previtaminD3/precholecalciferol/(6Z)-tacalciol	Sterol_Lipids	-11.4	0	0	54
616	LMST03020235	1beta-hydroxy-3-epivitaminD3/1beta-hydroxy-3-epicholecalciferol	Sterol_Lipids	-11.4	0	0	84
617	LMST03020253	1alpha,18-dihydroxyvitaminD3/1alpha,18-dihydroxycholecalciferol	Sterol_Lipids	-11.4	0	1	83
618	LMST03020272	(24R)-24,25-dihydroxyvitaminD3/(24R)-24,25-dihydroxycholecalciferol	Sterol_Lipids	-11.4	0	0	74
619	LMST03020310	1alpha-hydroxy-22-(4-hydroxyphenyl)-23,24,25,26,27-pentanorvitaminD3/1alpha-hydroxy-22-(4-hydroxyphenyl)-23,24,25,26,27-pentanorcholecalciferol	Sterol_Lipids	-11.4	0	0	76
620	LMST03020316	(22E)-(25R)-25-hydroxy-26-methyl-22,23-didehydrovitaminD3/(22E)-(25R)-25-hydroxy-26-methyl-22,23-didehydrocholecalciferol	Sterol_Lipids	-11.4	0	0	82
621	LMST03020319	(22E)-1alpha,25-dihydroxy-26-methyl-22,23-didehydrovitaminD3/(22E)-1alpha,25-dihydroxy-26-methyl-22,23-didehydrocholecalciferol	Sterol_Lipids	-11.4	0	0	69
622	LMST03020328	11alpha-(fluoromethyl)-1alpha,25-dihydroxyvitaminD3/11alpha-(fluoromethyl)-1alpha,25-dihydroxycholecalciferol	Sterol_Lipids	-11.4	0	0	83
623	LMST03020333	(10E)-19-methylvitaminD3/(10E)-19-methylcholecalciferol	Sterol_Lipids	-11.4	0	0	68
624	LMST03020351	2beta-methyl-1beta,25-dihydroxyvitaminD3/2beta-methyl-1beta,25-dihydroxycholecalciferol	Sterol_Lipids	-11.4	0	0	79
625	LMST03020360	2alpha-methyl-3-epi-20-epi-1beta,25-dihydroxyvitaminD3/2alpha-methyl-3-epi-20-epi-1beta,25-dihydroxycholecalciferol	Sterol_Lipids	-11.4	0	0	82
626	LMST03020427	(20S)-1alpha,25-dihydroxy-20-methoxy-24a-homovitaminD3/(20S)-1alpha,25-dihydroxy-20-methoxy-24a-homocholecalciferol	Sterol_Lipids	-11.4	0	1	111
627	LMST03020595	(24aE)-1alpha,25-dihydroxy-24a,24b-didehydro-24a,24b-dihomovitaminD3/(24aE)-1alpha,25-dihydroxy-24a,24b-didehydro-24a,24b-dihomocholecalciferol	Sterol_Lipids	-11.4	0	0	102
628	LMST03020624	18-(3-Hydroxy-3-methylbutyl)-20-methyl-9,10-secopregna-5,7,10(19),20-tetraene-1,3-diol	Sterol_Lipids	-11.4	0	0	78
629	LMST03020640	VD2656	Sterol_Lipids	-11.4	0	2	103
630	LMST04010137	-	Sterol_Lipids	-11.4	0	0	69
631	LMST04010165	-	Sterol_Lipids	-11.4	0	0	77
632	LMST04010233	-	Sterol_Lipids	-11.4	0	0	67
633	LMST04010239	-	Sterol_Lipids	-11.4	0	0	66
634	LMST04010322	-	Sterol_Lipids	-11.4	0	0	77
635	LMST04010327	-	Sterol_Lipids	-11.4	0	0	55
636	LMST04010337	-	Sterol_Lipids	-11.4	0	0	80
637	LMST04010351	-	Sterol_Lipids	-11.4	0	0	63
638	LMST04010363	-	Sterol_Lipids	-11.4	0	0	67
639	LMST04010396	-	Sterol_Lipids	-11.4	0	0	71
640	LMST04010422	-	Sterol_Lipids	-11.4	0	0	81
641	LMST04030132	-	Sterol_Lipids	-11.4	0	1	97
642	LMST04030168	7alpha,24-dihydroxy-5beta-cholestan-3-one	Sterol_Lipids	-11.4	0	0	82
643	LMST04030169	7alpha,24-dihydroxycholest-4-en-3-one	Sterol_Lipids	-11.4	0	0	86
644	LMST04030174	(24R)-7alpha,24-dihydroxycholesterol	Sterol_Lipids	-11.4	0	0	82
645	LMST04030247	7alpha,12alpha,24,25-Tetrahydroxycholest-4-en-3-one	Sterol_Lipids	-11.4	0	1	108
646	LMST01040127	-	Sterols	-11.4	0	1	88
647	LMST01040133	Scottenol	Sterols	-11.4	0	0	79
648	LMST01040142	-	Sterols	-11.4	0	0	101
649	LMST01040173	-	Sterols	-11.4	0	1	89
650	LMST01040203	Corbisterol	Sterols	-11.4	0	1	69
651	LMST01040239	Porifersta-7,25(27)-dienol	Sterols	-11.4	0	0	80
652	LMST01040244	5alpha-poriferastane	Sterols	-11.4	0	2	85
653	LMST01040268	CraterolB	Sterols	-11.4	0	1	80
654	LMST01050017	25-Methyl-24-isopropenyl-cholesterol	Sterols	-11.4	0	0	89
655	LMST01080026	Yonogenin	Sterols	-11.4	0	0	79
656	LMST01080042	PrazerigeninA	Sterols	-11.4	0	3	72
657	LMST01080097	AsparacemosoneC	Sterols	-11.4	0	3	72
658	LMST01100000	9beta,19-cyclo-lanostaneskeleton	Sterols	-11.4	0	0	79
659	LMST01100008	cycloartenol	Sterols	-11.4	0	1	79
660	LMST01100010	(24R)-24-methylcycloart-25-en-3beta-ol	Sterols	-11.4	0	1	73
661	LMST01130053	Melianthugenin	Sterols	-11.4	1	1	69
662	LMST01130054	16beta-hydroxy-melianthugenin	Sterols	-11.4	1	1	88
663	LMST01150007	Solanidine	Sterols	-11.4	0	2	68
664	LMST01160025	-	Sterols	-11.4	0	2	110
665	ZINC000000006990	SarizotanHydrochloride	World_NOT_FDA	-11.4	0	0	64
666	ZINC000003821234		World_NOT_FDA	-11.4	1	0	44
667	ZINC000003873364		World_NOT_FDA	-11.4	0	0	50
668	ZINC000003873781	Metergoline	World_NOT_FDA	-11.4	1	0	72
669	ZINC000004654793		World_NOT_FDA	-11.4	0	1	86
670	ZINC000015919406	Ono-Rs411	World_NOT_FDA	-11.4	1	1	102
671	ZINC000253616932	11-deoxycorticosteronepivalate	World_NOT_FDA	-11.4	0	0	53
672	ZINC000000000706	sanguinarine	Metab	-11.4	1	1	37
673	ZINC000002516840	lanol	Metab	-11.4	0	0	89
674	ZINC000003978003	Ergocalciferol(VitaminD2)	Metab	-11.4	0	0	75
675	ZINC000004027519	nevskin	Metab	-11.4	1	0	53
676	ZINC000004096816	22b-hydroxycholesterol	Metab	-11.4	0	0	92
677	ZINC000004098720	hispaglabridina	Metab	-11.4	0	0	55
678	ZINC000004215039	myagen	Metab	-11.4	1	0	55
679	ZINC000004706381	fucostanol	Metab	-11.4	1	0	77
680	ZINC000006206700	(+)-mahanimbicine	Metab	-11.4	0	0	49
681	ZINC000006569100	campestrol	Metab	-11.4	0	1	79
682	ZINC000017044426	isosilybin	Metab	-11.4	1	0	68
683	ZINC000028967263	clerosterol	Metab	-11.4	0	0	76
684	ZINC000040164219	3alpha,7alpha-Dihydroxycoprostanicacid	Metab	-11.4	0	1	73
685	ZINC000100038173	Isosilybin	Metab	-11.4	2	0	77
686	ZINC000253609460	Dihydrobrassicasterol	Metab	-11.4	0	0	64
687	ZINC000254682661	(5x,6x)-5,6-Epoxyergosta-7,22-dien-3-ol	Metab	-11.4	1	1	78
688	ZINC000257410709	Isomangiferolicacid	Metab	-11.4	0	2	99
689	LMST01010004	5,6alpha-epoxy-cholesterol(d7)	Chol, Sterols	-11.3	0	1	90
690	LMST01010009	5,6beta-epoxy-cholesterol(d7)	Chol, Sterols	-11.3	0	0	88
691	LMST01010011	5,6alpha-epoxy-cholesterol	Chol, Sterols	-11.3	0	1	88
692	LMST01010057	27-hydroxy-cholesterol	Chol, Sterols	-11.3	1	0	85
693	LMST01010086	22R-hydroxycholesterol	Chol, Sterols	-11.3	0	0	82
694	LMST01010139	Lophanol	Chol, Sterols	-11.3	0	2	86
695	LMST01010147	27-hydroxy-cholesterol(d6)	Chol, Sterols	-11.3	1	0	85
696	LMST01010310	20S-Hydroxycholest-4-en-3,16-dione	Chol, Sterols	-11.3	0	1	91
697	LMST01010346	Marthasterone	Chol, Sterols	-11.3	0	2	73
698	LMST01010384	5alpha,6alpha-24S,25-diepoxy-cholesterol	Chol, Sterols	-11.3	0	1	82
699	LMST01010393	GanosporericacidA	Chol, Sterols	-11.3	1	1	94
700	LMST01010413	GanoweberianicacidA	Chol, Sterols	-11.3	3	1	111
701	LMST01010466	7alpha,25(S)26-dihydroxycholesterol	Chol, Sterols	-11.3	1	0	91
702	LMST01030094	5-dihydroergosterol	Erg, Sterols	-11.3	0	2	91
703	LMST01030114	24-epibrassicasterol	Erg, Sterols	-11.3	0	0	76
704	LMST01031019	4alpha-Methylfecosterol	Erg, Sterols	-11.3	0	1	90
705	LMST01031025	-	Erg, Sterols	-11.3	0	1	86
706	LMST01031026	-	Erg, Sterols	-11.3	0	1	85
707	LMST01031028	Codisterol	Erg, Sterols	-11.3	0	1	71
708	LMST01031036	25(26)-dehydroaplysterol	Erg, Sterols	-11.3	0	0	72
709	LMST01031040	25-methylxestosterol	Erg, Sterols	-11.3	0	0	93
710	LMST01031049	Occelasterol	Erg, Sterols	-11.3	0	0	74
711	LMST01031053	24S-isopropenyl-cholesterol	Erg, Sterols	-11.3	0	0	83
712	LMST01031068	-	Erg, Sterols	-11.3	0	0	94
713	LMST01031077	-	Erg, Sterols	-11.3	0	2	81
714	LMST01031086	ConicasterolC	Erg, Sterols	-11.3	1	1	95
715	LMST01031099	StoloniferoneN	Erg, Sterols	-11.3	0	0	102
716	LMST01031113	NebrosteroidM	Erg, Sterols	-11.3	0	1	95
717	LMST01031114	-	Erg, Sterols	-11.3	0	0	79
718	LMST01031175	Ergosterolperoxide	Erg, Sterols	-11.3	0	0	82
719	LMST02030121	Hydrocortisonecypionate	Steroids, Sterol_Lipids	-11.3	0	3	90
720	LMST01060038	-	Sterol_Lipids	-11.3	0	4	98
721	LMST03010016	tachysterol2	Sterol_Lipids	-11.3	0	0	64
722	LMST03010017	isotachysterol2	Sterol_Lipids	-11.3	0	0	64
723	LMST03010057	3-epidihydrotachysterol2/(5E)-(10S)-10,19-dihydro-3-epivitaminD2/(5E)-(10S)-10,19-dihydro-3-epiergocalciferol	Sterol_Lipids	-11.3	0	0	84
724	LMST03020034	(22E,24E)-1alpha,26-dihydroxy-22,23,24,25-tetradehydro-27-norvitaminD3/(22E,24E)-1alpha,26-dihydroxy-22,23,24,25-tetradehydro-27-norcholecalciferol	Sterol_Lipids	-11.3	0	0	78
725	LMST03020039	1alpha,25-dihydroxy-24-oxo-22-oxavitaminD3/1alpha,25-dihydroxy-24-oxo-22-oxacholecalciferol	Sterol_Lipids	-11.3	0	0	74
726	LMST03020052	(5Z)-(3S)-1alpha,25-dihydroxy-3-deoxy-3-thiavitaminD33-oxide/(5Z)-(3S)-1alpha,25-dihydroxy-3-deoxy-3-thiacholecalciferol3-oxide	Sterol_Lipids	-11.3	0	0	95
727	LMST03020058	(24S)-1alpha,24-dihydroxy-22-oxavitaminD3/(24S)-1alpha,24-dihydroxy-22-oxacholecalciferol	Sterol_Lipids	-11.3	0	0	69
728	LMST03020078	26,26,26,27,27,27-hexafluoro-1alpha,25-dihydroxy-16,17,23,23,24,24-hexadehydrovitaminD3/26,26,26,27,27,27-hexafluoro-1alpha,25-dihydroxy-16,17,23,23,24,24-hexadehydrocholecalciferol	Sterol_Lipids	-11.3	0	3	91
729	LMST03020102	25-hydroxy-23,23,24,24-tetradehydrovitaminD3/25-hydroxy-23,23,24,24-tetradehydrocholecalciferol	Sterol_Lipids	-11.3	0	0	64
730	LMST03020106	(22E)-(24S)-1alpha,24-dihydroxy-26,27-cyclo-22,23-didehydrovitaminD3/(22E)-(24S)-1alpha,24-dihydroxy-26,27-cyclo-22,23-didehydrocholecalciferol/Calcipotriol	Sterol_Lipids	-11.3	0	0	69
731	LMST03020114	(22E,24E)-1alpha,26a-dihydroxy-22,23,24,25-tetradehydro-26a-homo-27-norvitaminD3/(22E,24E)-1alpha,26a-dihydroxy-22,23,24,25-tetradehydro-26a-homo-27-norcholecalciferol	Sterol_Lipids	-11.3	0	0	84
732	LMST03020139	23,23-difluoro-25-hydroxyvitaminD3/23,23-difluoro-25-hydroxycholecalciferol	Sterol_Lipids	-11.3	0	0	86
733	LMST03020156	calicoferolE	Sterol_Lipids	-11.3	0	0	59
734	LMST03020170	1alpha,25-dihydroxy-16,17-didehydrovitaminD3/1alpha,25-dihydroxy-16,17-didehydrocholecalciferol	Sterol_Lipids	-11.3	0	0	73
735	LMST03020196	6-fluorovitaminD3/6-fluorocholecalciferol	Sterol_Lipids	-11.3	0	0	81
736	LMST03020201	22-fluorovitaminD3/22-fluorocholecalciferol	Sterol_Lipids	-11.3	0	1	71
737	LMST03020231	1alpha-hydroxy-3-epivitaminD3/1alpha-hydroxy-3-epicholecalciferol	Sterol_Lipids	-11.3	0	0	86
738	LMST03020233	(5E)-1alpha-hydroxy-3-epivitaminD3/(5E)-1alpha-hydroxy-3-epicholecalciferol	Sterol_Lipids	-11.3	0	2	81
739	LMST03020255	(24R)-1alpha,24-dihydroxyvitaminD3/(24R)-1alpha,24-dihydroxycholecalciferol	Sterol_Lipids	-11.3	0	0	82
740	LMST03020268	(22R)-22,25-dihydroxyvitaminD3/(22R)-22,25-dihydroxycholecalciferol	Sterol_Lipids	-11.3	0	0	64
741	LMST03020322	(22E)-(25R)-1alpha,25-dihydroxy-26-methyl-22,23-didehydrovitaminD3/(22E)-(25R)-1alpha,25-dihydroxy-26-methyl-22,23-didehydrocholecalciferol	Sterol_Lipids	-11.3	0	0	94
742	LMST03020334	(5E,10E)-19-methylvitaminD3/(5E,10E)-19-methylcholecalciferol	Sterol_Lipids	-11.3	0	0	81
743	LMST03020342	(22S)-25-hydroxy-22-methoxyvitaminD3/(22S)-25-hydroxy-22-methoxycholecalciferol	Sterol_Lipids	-11.3	0	0	76
744	LMST03020343	25-hydroxy-3,3-dimethyl-3-deoxy-A-homo-2,4-dioxavitaminD3/25-hydroxy-3,3-dimethyl-3-deoxy-A-homo-2,4-dioxacholecalciferol	Sterol_Lipids	-11.3	0	0	75
745	LMST03020344	1alpha,25-dihydroxy-1beta-methylvitaminD3/1alpha,25-dihydroxy-1beta-methylcholecalciferol	Sterol_Lipids	-11.3	0	0	79
746	LMST03020354	2alpha-methyl-20-epi-1alpha,25-dihydroxyvitaminD3/2alpha-methyl-20-epi-1alpha,25-dihydroxycholecalciferol	Sterol_Lipids	-11.3	0	0	87
747	LMST03020364	1alpha,25-dihydroxy-18-methylvitaminD3/1alpha,25-dihydroxy-18-methylcholecalciferol	Sterol_Lipids	-11.3	0	0	77
748	LMST03020401	24,24-difluoro-1alpha,25-dihydroxy-26,27-dimethylvitaminD3/24,24-difluoro-1alpha,25-dihydroxy-26,27-dimethylcholecalciferol	Sterol_Lipids	-11.3	0	0	104
749	LMST03020410	1alpha,25-dihydroxy-11alpha-[(1R)-oxiranyl]vitaminD3/1alpha,25-dihydroxy-11alpha-[(1R)-oxiranyl]cholecalciferol	Sterol_Lipids	-11.3	0	0	84
750	LMST03020441	toxisterol3B2/(5E)-(10S)-10-ethoxy-10,19-dihydrovitaminD3/(5E)-(10S)-10-ethoxy-10,19-dihydrocholecalciferol	Sterol_Lipids	-11.3	0	0	84
751	LMST03020594	(24E)-1alpha,25-dihydroxy-24,24a-didehydro-24a,24b-dihomovitaminD3/(24E)-1alpha,25-dihydroxy-24,24a-didehydro-24a,24b-dihomocholecalciferol	Sterol_Lipids	-11.3	0	1	106
752	LMST03020596	(10S)-1alpha,19,25-trihydroxy-10,19-dihydrovitaminD3/(10S)-1alpha,19,25-trihydroxy-10,19-dihydrocholecalciferol	Sterol_Lipids	-11.3	0	0	106
753	LMST03020608	1alpha,25-Dihydroxy-16-ene-19-nor-24-oxovitaminD3	Sterol_Lipids	-11.3	0	0	80
754	LMST03020623	25-Hydroxy[26,27-methyl]vitaminD33beta-(1,2-epoxypropyl)ether	Sterol_Lipids	-11.3	0	0	100
755	LMST03020664	24-DehydroprevitaminD3	Sterol_Lipids	-11.3	0	0	63
756	LMST04010128	-	Sterol_Lipids	-11.3	0	0	64
757	LMST04010132	-	Sterol_Lipids	-11.3	0	1	72
758	LMST04010194	-	Sterol_Lipids	-11.3	0	0	73
759	LMST04010210	-	Sterol_Lipids	-11.3	0	0	63
760	LMST04010234	-	Sterol_Lipids	-11.3	0	1	70
761	LMST04010354	-	Sterol_Lipids	-11.3	0	0	74
762	LMST04010366	-	Sterol_Lipids	-11.3	0	0	61
763	LMST04010388	-	Sterol_Lipids	-11.3	0	0	65
764	LMST04010394	-	Sterol_Lipids	-11.3	0	0	74
765	LMST04010433	-	Sterol_Lipids	-11.3	0	0	67
766	LMST04010436	-	Sterol_Lipids	-11.3	0	0	62
767	LMST04030235	7beta,24-dihydroxy-cholestenoicacid	Sterol_Lipids	-11.3	0	1	101
768	LMST04030236	7beta,25-dihydroxy-cholestenoicacid	Sterol_Lipids	-11.3	0	1	107
769	LMST05030018	3beta,5alpha,6beta-Trihydroxy-cholanoyl-glycine	Sterol_Lipids	-11.3	0	1	91
770	LMST01040124	Clerosterol	Sterols	-11.3	0	1	76
771	LMST01040137	-	Sterols	-11.3	0	0	77
772	LMST01040151	(3beta,24R,24'R)-fucosterolepoxide	Sterols	-11.3	0	1	80
773	LMST01040168	(3beta,24S,24'S)-fucosterolepoxide	Sterols	-11.3	0	0	79
774	LMST01040172	24-allenyl-cholesterol	Sterols	-11.3	0	2	66
775	LMST01040176	-	Sterols	-11.3	0	2	80
776	LMST01040275	7alpha-Theonellasterol	Sterols	-11.3	0	1	103
777	LMST01050013	24-Isopropyl-22E-dehydrocholesterol	Sterols	-11.3	0	0	85
778	LMST01060013	-	Sterols	-11.3	0	2	92
779	LMST01060032	Gorgostan-5,25-dien-3beta-ol	Sterols	-11.3	0	1	73
780	LMST01080007	Sarsasapogenenin	Sterols	-11.3	0	1	65
781	LMST01080009	Tigogenin	Sterols	-11.3	0	1	73
782	LMST01080010	Gitogenin	Sterols	-11.3	0	1	79
783	LMST01080027	Tokorogenin	Sterols	-11.3	0	1	83
784	LMST01090001	Nuatigenin	Sterols	-11.3	1	1	79
785	LMST01110010	Petrostanol	Sterols	-11.3	0	2	78
786	LMST01120004	cannogenin	Sterols	-11.3	1	0	62
787	LMST01150005	tomatidinol	Sterols	-11.3	0	1	70
788	LMST01150011	25-iso-etioline	Sterols	-11.3	0	1	67
789	ZINC000001482077	Gliquidone	World_NOT_FDA	-11.3	2	1	121
790	ZINC000118912516		World_NOT_FDA	-11.3	0	0	77
791	ZINC000253616931		World_NOT_FDA	-11.3	0	0	59
792	ZINC000000897618	Silandrin	Metab	-11.3	2	0	75
793	ZINC000000968444	mahanimbine	Metab	-11.3	0	1	37
794	ZINC000002585491	1,2,3,4-Tetrahydro-1-phenyl-4-(1-phenylethyl)naphthalene	Metab	-11.3	0	0	45
795	ZINC000003782599	proscar	FDA	-11.3	0	0	59
796	ZINC000003881640	megace	FDA	-11.3	1	0	47
797	ZINC000003921872	dovonex	FDA	-11.3	1	1	75
798	ZINC000004098734	rotenolone	Metab	-11.3	0	0	54
799	ZINC000004098742	phaseolinisoflavan	Metab	-11.3	0	0	38
800	ZINC000006206699	(+)-mahanimbicine	Metab	-11.3	2	0	55
801	ZINC000008217100	3a,7a,12a-Trihydroxy-5b-cholestan-26-al	Metab	-11.3	0	1	70
802	ZINC000013512293	7alpha-Hydroxy-3-oxo-4-cholestenoate	Metab	-11.3	0	2	66
803	ZINC000014766825	br-xanthonea	Metab	-11.3	0	0	80
804	ZINC000033830831	isodiospyrin	Metab	-11.3	1	0	65
805	ZINC000034944434	silandrin	Metab	-11.3	1	0	75
806	ZINC000040164193	Glycocholicacid	Metab	-11.3	2	1	72
807	ZINC000056874535	7alpha,24-dihydroxy-4-cholesten-3-one	Metab	-11.3	0	1	61
808	ZINC000100038169	Isosilybin	Metab	-11.3	1	0	73
809	ZINC000100822245	isosilybin	Metab	-11.3	1	0	74
810	ZINC000230075702	silandrin	Metab	-11.3	2	0	73
811	ZINC000253597112	Sesamolin	Metab	-11.3	0	0	42
812	ZINC000254685395	3beta-3-Lupanol	Metab	-11.3	0	6	83
813	ZINC000256427308	Clerosterol	Metab	-11.3	1	0	73
814	ZINC000257416693	5alpha-Cholest-7-en-3-one	Metab	-11.3	0	0	63
815	LMST02020092	3a,16-Dihydroxyandrostenone	Androgens, Steroids, Sterol_Lipids	-11.2	0	0	50
816	LMST05010004	17beta-Estradiol3-(beta-D-glucuronide)	Androgens, Steroids, Sterol_Lipids	-11.2	0	1	87
817	LMST01010012	24,25-epoxy-cholesterol	Chol, Sterols	-11.2	0	0	83
818	LMST01010142	-	Chol, Sterols	-11.2	0	2	86
819	LMST01010148	24,25-epoxy-cholesterol(d6)	Chol, Sterols	-11.2	0	1	72
820	LMST01010171	zymosterolintermediate1b	Chol, Sterols	-11.2	0	1	87
821	LMST01010190	lanostane	Chol, Sterols	-11.2	0	1	89
822	LMST01010222	32-oxolanosterol	Chol, Sterols	-11.2	0	1	97
823	LMST01010236	-	Chol, Sterols	-11.2	0	1	89
824	LMST01010249	-	Chol, Sterols	-11.2	0	1	86
825	LMST01010278	Cholesterol-5alpha-hydroperoxide	Chol, Sterols	-11.2	0	0	88
826	LMST01010295	-	Chol, Sterols	-11.2	0	0	76
827	LMST01010307	20S-Hydroxycholestane-3,16-dione	Chol, Sterols	-11.2	0	1	93
828	LMST01010360	Cholesterol-5beta-hydroperoxide	Chol, Sterols	-11.2	0	0	82
829	LMST01010365	Zymostenol-d7	Chol, Sterols	-11.2	0	1	85
830	LMST01010391	GanodericacidA	Chol, Sterols	-11.2	1	2	106
831	LMST01010449	25-Hydroxy-7-oxocholesterol	Chol, Sterols	-11.2	0	0	95
832	LMST01030098	Brassicasterol	Erg, Sterols	-11.2	0	1	83
833	LMST01030107	-	Erg, Sterols	-11.2	0	0	79
834	LMST01030120	6-deoxoteasterone	Erg, Sterols	-11.2	1	1	96
835	LMST01030124	6-Deoxocathasterone	Erg, Sterols	-11.2	0	0	75
836	LMST01031033	Aplysterol	Erg, Sterols	-11.2	0	0	85
837	LMST01031034	24(28)-dehydroaplysterol	Erg, Sterols	-11.2	0	0	99
838	LMST01031041	Stelliferasterol	Erg, Sterols	-11.2	0	0	81
839	LMST01031045	Dinosterone	Erg, Sterols	-11.2	0	4	90
840	LMST01031066	-	Erg, Sterols	-11.2	0	0	92
841	LMST01031074	-	Erg, Sterols	-11.2	0	1	86
842	LMST01031091	29-demethylgeodisterol-O-sulfite	Erg, Sterols	-11.2	2	1	104
843	LMST01031125	22,23-dihydroxycampesterol	Erg, Sterols	-11.2	0	1	97
844	LMST01031151	DaturmetesideC	Erg, Sterols	-11.2	2	2	111
845	LMST01031163	ArmatinolA	Erg, Sterols	-11.2	0	0	102
846	LMST02030242	ClathroidA	Steroids, Sterol_Lipids	-11.2	0	1	72
847	LMST03010011	(24R)-24-fluoro-1alpha,25-dihydroxyvitaminD2/(24R)-24-fluoro-1alpha,25-dihydroxyergocalciferol	Sterol_Lipids	-11.2	0	0	76
848	LMST03010033	(22Z)-1alpha,25-dihydroxy-20-epivitaminD2/(22Z)-1alpha,25-dihydroxy-20-epiergocalciferol	Sterol_Lipids	-11.2	0	0	74
849	LMST03010048	(24R)-24,25-dihydroxyvitaminD2/(24R)-24,25-dihydroxyergocalciferol	Sterol_Lipids	-11.2	0	0	68
850	LMST03010049	24,25-dihydroxy-24-epivitaminD2/24,25-dihydroxy-24-epiergocalciferol	Sterol_Lipids	-11.2	0	0	67
851	LMST03010066	26,27-Dihomo-1alpha-hydroxy-24-epivitaminD2	Sterol_Lipids	-11.2	0	1	94
852	LMST03020003	1alpha-hydroxy-20-oxo-22,23,24,25,26,27-hexanorvitaminD3/1alpha-hydroxy-20-oxo-22,23,24,25,26,27-hexanorcholecalciferol	Sterol_Lipids	-11.2	0	0	65
853	LMST03020009	1alpha-hydroxy-23,24,25,26,27-pentanorvitaminD3/1alpha-hydroxy-23,24,25,26,27-pentanorcholecalciferol	Sterol_Lipids	-11.2	0	0	69
854	LMST03020022	1alpha-hydroxy-25,26,27-trinorvitaminD324-carboxylicacid	Sterol_Lipids	-11.2	0	0	65
855	LMST03020040	25-hydroxy-3-deoxy-2-oxavitaminD3/25-hydroxy-3-deoxy-2-oxacholecalciferol	Sterol_Lipids	-11.2	0	0	62
856	LMST03020045	25-hydroxy-23-oxavitaminD3/25-hydroxy-23-oxacholecalciferol	Sterol_Lipids	-11.2	0	0	62
857	LMST03020046	1alpha,25-dihydroxy-24-norvitaminD3/1alpha,25-dihydroxy-24-norcholecalciferol	Sterol_Lipids	-11.2	0	0	84
858	LMST03020104	(22E)-25-hydroxy-24-oxo-22,23-didehydrovitaminD3/(22E)-25-hydroxy-24-oxo-22,23-didehydrocholecalciferol	Sterol_Lipids	-11.2	0	1	68
859	LMST03020109	(23E)-1alpha,25-dihydroxy-16,17,23,24-tetradehydrovitaminD3/(23E)-1alpha,25-dihydroxy-16,17,23,24-tetradehydrocholecalciferol	Sterol_Lipids	-11.2	0	2	98
860	LMST03020124	(23S,25S)-1alpha,25-dihydroxyvitaminD326,23-lactone/(23S,25S)-1alpha,25-dihydroxycholecalciferol26,23-lactone	Sterol_Lipids	-11.2	0	1	81
861	LMST03020129	(20S,24S)-20-fluoro-1alpha,24-dihydroxy-26,27-cyclovitaminD3/(20S,24S)-20-fluoro-1alpha,24-dihydroxy-26,27-cyclocholecalciferol	Sterol_Lipids	-11.2	0	1	83
862	LMST03020150	(22Z)-1beta-hydroxy-22,23-didehydrovitaminD3/(22Z)-1beta-hydroxy-22,23-didehydrocholecalciferol	Sterol_Lipids	-11.2	0	0	86
863	LMST03020159	24,25-epoxy-1alpha-hydroxyvitaminD3/24,25-epoxy-1alpha-hydroxycholecalciferol	Sterol_Lipids	-11.2	0	0	86
864	LMST03020179	calicoferolB	Sterol_Lipids	-11.2	0	0	67
865	LMST03020200	(5E,10E)-19-fluorovitaminD3/(5E,10E)-19-fluorocholecalciferol	Sterol_Lipids	-11.2	0	0	83
866	LMST03020209	24-fluoro-25-hydroxyvitaminD3/24-fluoro-25-hydroxycholecalciferol	Sterol_Lipids	-11.2	0	0	70
867	LMST03020214	(5E,10E)-19-fluoro-1alpha,25-dihydroxyvitaminD3/(5E,10E)-19-fluoro-1alpha,25-dihydroxycholecalciferol	Sterol_Lipids	-11.2	0	0	68
868	LMST03020234	1beta-hydroxyvitaminD3/1beta-hydroxycholecalciferol	Sterol_Lipids	-11.2	0	0	58
869	LMST03020275	(25S)-25,26-dihydroxyvitaminD3/(25S)-25,26-dihydroxycholecalciferol	Sterol_Lipids	-11.2	0	1	70
870	LMST03020284	1alpha,25-dihydroxy-10,19-methano-23-oxavitaminD3/1alpha,25-dihydroxy-10,19-methano-23-oxacholecalciferol	Sterol_Lipids	-11.2	0	0	94
871	LMST03020300	(24R)-6,19-epidioxy-1alpha,24-dihydroxy-6,19-dihydrovitaminD3/(24R)-6,19-epidioxy-1alpha,24-dihydroxy-6,19-dihydrocholecalciferol	Sterol_Lipids	-11.2	0	0	75
872	LMST03020318	25-hydroxy-24-methyl-23,24-didehydrovitaminD3/25-hydroxy-24-methyl-23,24-didehydrocholecalciferol	Sterol_Lipids	-11.2	0	0	75
873	LMST03020356	2alpha-methyl-3-epi-20-epi-1alpha,25-dihydroxyvitaminD3/2alpha-methyl-3-epi-20-epi-1alpha,25-dihydroxycholecalciferol	Sterol_Lipids	-11.2	0	0	83
874	LMST03020368	1alpha,25-dihydroxy-24a,24b-didihomo-22-thia-20-epivitaminD3/1alpha,25-dihydroxy-24a,24b-didihomo-22-thia-20-epicholecalciferol	Sterol_Lipids	-11.2	0	0	90
875	LMST03020389	1alpha-hydroxy-22-(3-methylphenyl)-23,24,25,26,27-pentanorvitaminD3/1alpha-hydroxy-22-(3-methylphenyl)-23,24,25,26,27-pentanorcholecalciferol	Sterol_Lipids	-11.2	0	0	84
876	LMST03020395	1alpha,25-dihydroxy-26,27-dimethyl-22,22,23,23-tetradehydrovitaminD3/1alpha,25-dihydroxy-26,27-dimethyl-22,22,23,23-tetradehydro-cholecalciferol	Sterol_Lipids	-11.2	0	1	99
877	LMST03020400	(22R)-1alpha,22,25-trihydroxy-26,27-dimethyl-23,24-tetradehydro-20-epivitaminD3/(22R)-1alpha,22,25-trihydroxy-26,27-dimethyl-23,24-tetradehydro-20-epicholecalciferol	Sterol_Lipids	-11.2	0	0	114
878	LMST03020407	1alpha,25-dihydroxy-26,27-ethanovitaminD3/1alpha,25-dihydroxy-26,27-ethanocholecalciferol	Sterol_Lipids	-11.2	0	1	100
879	LMST03020436	(20S)-14alpha,20,25-trihydroxy-26,27-dimethylvitaminD3/(20S)-1alpha,20,25-trihydroxy-26,27-dimethylcholecalciferol	Sterol_Lipids	-11.2	0	0	105
880	LMST03020522	1alpha,25-dihydroxy-2beta-(5-hydroxypentyl)vitaminD3/1alpha,25-dihydroxy-2beta-(5-hydroxypentyl)cholecalciferol	Sterol_Lipids	-11.2	0	0	147
881	LMST03020562	1beta,25-dihydroxy-3-deoxy-19-norvitaminD3/1beta,25-dihydroxy-3-deoxy-19-norcholecalciferol	Sterol_Lipids	-11.2	0	0	67
882	LMST03020563	25-dihydroxy-19-nor-3-epivitaminD3/25-dihydroxy-19-nor-3-epicholecalciferol	Sterol_Lipids	-11.2	0	0	69
883	LMST03020589	1alpha-hydroxy-18-[m-(1-hydroxy-1-ethylpropyl)-benzyloxy]-23,24,25,26,27-pentanorvitaminD3/1alpha-hydroxy-18-[m-(1-hydroxy-1-ethylpropyl)-benzyloxy]-23,24,25,26,27-pentanorcholecalciferol	Sterol_Lipids	-11.2	0	2	116
884	LMST03020652	VitaminD3butyrate	Sterol_Lipids	-11.2	0	0	74
885	LMST03020654	5,6-trans-25-HydroxyvitaminD3	Sterol_Lipids	-11.2	0	0	88
886	LMST03020682	Atocalcitol	Sterol_Lipids	-11.2	0	1	107
887	LMST03040003	1-HydroxyvitaminD5	Sterol_Lipids	-11.2	0	1	75
888	LMST04010138	-	Sterol_Lipids	-11.2	0	0	69
889	LMST04010145	-	Sterol_Lipids	-11.2	0	0	76
890	LMST04010163	-	Sterol_Lipids	-11.2	0	0	65
891	LMST04010177	-	Sterol_Lipids	-11.2	0	0	81
892	LMST04010179	-	Sterol_Lipids	-11.2	0	0	82
893	LMST04010203	-	Sterol_Lipids	-11.2	0	0	66
894	LMST04010242	-	Sterol_Lipids	-11.2	0	0	73
895	LMST04010258	-	Sterol_Lipids	-11.2	0	1	74
896	LMST04010264	-	Sterol_Lipids	-11.2	0	0	65
897	LMST04010265	-	Sterol_Lipids	-11.2	0	0	68
898	LMST04010270	-	Sterol_Lipids	-11.2	0	0	69
899	LMST04010296	-	Sterol_Lipids	-11.2	0	0	65
900	LMST04010399	-	Sterol_Lipids	-11.2	0	1	70
901	LMST04010415	-	Sterol_Lipids	-11.2	0	0	78
902	LMST04030081	-	Sterol_Lipids	-11.2	0	0	89
903	LMST04030107	-	Sterol_Lipids	-11.2	0	0	95
904	LMST04030131	-	Sterol_Lipids	-11.2	0	1	99
905	LMST04030148	7alpha-hydroxy-3-oxocholest-4-en-27-oicacid	Sterol_Lipids	-11.2	0	1	95
906	LMST04030156	7alpha,26-dihydroxycholest-4-en-3-one	Sterol_Lipids	-11.2	0	0	90
907	LMST04030163	-	Sterol_Lipids	-11.2	0	0	72
908	LMST04030178	16alpha,27-dihydroxycholesterol	Sterol_Lipids	-11.2	0	0	97
909	LMST04030187	(25R)-1beta,3alpha,7alpha-trihydroxy-5beta-cholestan-26-oicacid	Sterol_Lipids	-11.2	0	1	107
910	LMST04030245	7alpha,12alpha,(25R)26-Trihydroxy-5beta-cholestan-3-one	Sterol_Lipids	-11.2	0	1	102
911	LMST05020064	GlycocholicAcid	Sterol_Lipids	-11.2	0	1	97
912	LMST01040122	Clionasterol	Sterols	-11.2	0	1	81
913	LMST01040123	Stigmasterol	Sterols	-11.2	0	0	85
914	LMST01040126	Chondrillasterol	Sterols	-11.2	0	1	83
915	LMST01040132	-	Sterols	-11.2	0	2	78
916	LMST01040135	-	Sterols	-11.2	0	2	80
917	LMST01040140	Spinasterol	Sterols	-11.2	0	1	74
918	LMST01040156	Baikalosterol	Sterols	-11.2	0	0	85
919	LMST01040166	-	Sterols	-11.2	0	1	75
920	LMST01040169	-	Sterols	-11.2	0	1	103
921	LMST01040171	24R-Ethyl-26,26,27-trimethyl-3beta-hydroxycholesta-7,26-(30)-diene	Sterols	-11.2	0	0	81
922	LMST01040187	TheonellasterolH	Sterols	-11.2	0	2	94
923	LMST01040192	NorselicacidD	Sterols	-11.2	0	0	85
924	LMST01040263	Stigmast-4-ene-3,6-dione	Sterols	-11.2	0	0	67
925	LMST01040271	Saringosterone	Sterols	-11.2	0	2	75
926	LMST01050012	24-Ethyl-24-methyl-22E-dehydrocholesterol	Sterols	-11.2	0	1	86
927	LMST01050021	24E-propylidenecholesterol	Sterols	-11.2	0	2	75
928	LMST01060015	StoloniferoneM	Sterols	-11.2	0	2	103
929	LMST01080033	Rhodeasapagenin	Sterols	-11.2	0	2	74
930	LMST01080038	Ruscogenin	Sterols	-11.2	0	2	77
931	LMST01080041	Pennogenin	Sterols	-11.2	0	3	71
932	LMST01080045	Yamogenin	Sterols	-11.2	0	2	75
933	LMST01080086	Chlorogenin	Sterols	-11.2	0	0	74
934	LMST01090000	Furopirostaneskeleton	Sterols	-11.2	0	3	72
935	LMST01100011	cycloeucalenol	Sterols	-11.2	0	2	81
936	LMST01110006	Petrosterol	Sterols	-11.2	0	1	72
937	LMST01110009	Hebesterol	Sterols	-11.2	0	2	74
938	LMST01120003	gitoxigenin	Sterols	-11.2	0	1	58
939	LMST01150010	Teinemine	Sterols	-11.2	0	0	80
940	ZINC000000537877	Ketanserin	World_NOT_FDA	-11.2	1	0	58
941	ZINC000003873366		World_NOT_FDA	-11.2	0	0	43
942	ZINC000004096712	Stigmasterin	World_NOT_FDA	-11.2	0	0	75
943	ZINC000004212953	Dihydrotachysterol	World_NOT_FDA	-11.2	0	0	84
944	ZINC000005161502	4-Hydroxyalprazolam	World_NOT_FDA	-11.2	0	2	58
945	ZINC000005764428	2-Hydroxyethinylestradiol	World_NOT_FDA	-11.2	2	0	51
946	ZINC000118913164	Norethynodrel	World_NOT_FDA	-11.2	2	0	47
947	ZINC000000901095	glyceollin	Metab	-11.2	0	0	47
948	ZINC000001615142	Girinimbine	Metab	-11.2	0	0	29
949	ZINC000001996117	darifenacin	FDA	-11.2	0	0	64
950	ZINC000002572533	isosilybin	Metab	-11.2	2	0	87
951	ZINC000003807172	argatroban	FDA	-11.2	3	0	114
952	ZINC000003816514	rolapitant	FDA	-11.2	0	0	66
953	ZINC000003824121	4,4-Dimethylcholesta-8,14,24-trienol	Metab	-11.2	0	0	77
954	ZINC000003875383	cholesterol	Metab	-11.2	0	0	65
955	ZINC000003881648	aldadiene	Metab	-11.2	0	1	54
956	ZINC000004083904	isomultiflorenol	Metab	-11.2	0	5	80
957	ZINC000004095721	campesterol	Metab	-11.2	1	0	76
958	ZINC000004096712	stigmasterin	Metab	-11.2	0	1	77
959	ZINC000004099144	delta8,14-Sterol	Metab	-11.2	0	0	82
960	ZINC000005178688	Isomultiflorenol	Metab	-11.2	0	5	83
961	ZINC000005758789	7-oxocholesterol	Metab	-11.2	0	0	76
962	ZINC000005845755	isomahanine	Metab	-11.2	1	0	55
963	ZINC000005854568	kanzonolh	Metab	-11.2	0	1	56
964	ZINC000006050190	(-)-phaseollin	Metab	-11.2	0	1	57
965	ZINC000008219973	5beta-Cholestane-3alpha,7alpha,12alpha-triol	Metab	-11.2	0	1	68
966	ZINC000011616882	Axitinib	FDA	-11.2	1	0	48
967	ZINC000012493972	fucostanol	Metab	-11.2	0	2	71
968	ZINC000012494006	7-ketocholesterol	Metab	-11.2	0	1	81
969	ZINC000013423819	Butyrospermone	Metab	-11.2	0	4	100
970	ZINC000030725719	notavailable	Metab	-11.2	1	0	84
971	ZINC000034944431	silandrin	Metab	-11.2	1	0	79
972	ZINC000034944433	silandrin	Metab	-11.2	1	0	80
973	ZINC000052509463	vx-770	FDA	-11.2	0	0	61
974	ZINC000058581064	dolutegravir	FDA	-11.2	0	1	61
975	ZINC000059207573	25-Hydroxycholesterol	Metab	-11.2	0	0	78
976	ZINC000059589161	stigmastane-3,6-dione	Metab	-11.2	0	1	76
977	ZINC000085544552	Tauro-b-muricholicacid	Metab	-11.2	3	1	88
978	ZINC000096014376	Ikshusterol	Metab	-11.2	0	0	74
979	ZINC000118937140	isomangiferolicacid	Metab	-11.2	0	2	88
980	ZINC000253589460	Betulin	Metab	-11.2	0	6	77
981	ZINC000256427317	Clerosterol	Metab	-11.2	0	0	69
982	ZINC000256430526	Stigmastane-3,6-dione	Metab	-11.2	0	0	77
983	ZINC000256507439	Isomultiflorenol	Metab	-11.2	0	5	81
984	ZINC000256507444	Isomultiflorenol	Metab	-11.2	0	5	84
985	ZINC000256507448	Isomultiflorenol	Metab	-11.2	0	5	82
986	LMST02020084	testolactone	Androgens, DeltaL, Steroids	-11.1	0	0	38
987	LMST02020090	3a,16a-Dihydroxyandrostenone	Androgens, Steroids, Sterol_Lipids	-11.1	0	0	57
988	LMST02020091	3a,16b-Dihydroxyandrostenone	Androgens, Steroids, Sterol_Lipids	-11.1	1	0	54
989	LMST02020100	-	Androgens, Steroids, Sterol_Lipids	-11.1	0	1	54
990	LMST01010482	Saxosterol	Chol, Sterol_Lipids	-11.1	0	0	80
991	LMST01010010	5beta,6beta-epoxy-cholesterol	Chol, Sterols	-11.1	0	0	88
992	LMST01010018	25-hydroxy-cholesterol	Chol, Sterols	-11.1	0	0	93
993	LMST01010096	Zymostenol	Chol, Sterols	-11.1	0	1	84
994	LMST01010101	Dormantinol	Chol, Sterols	-11.1	1	1	91
995	LMST01010129	24S,27-dihydroxycholesterol	Chol, Sterols	-11.1	0	0	103
996	LMST01010146	25-hydroxy-cholesterol(d6)	Chol, Sterols	-11.1	0	0	93
997	LMST01010170	zymosterolintermediate1c	Chol, Sterols	-11.1	0	3	94
998	LMST01010225	4,4-Dimethylcholest-8-enol	Chol, Sterols	-11.1	0	1	95
999	LMST01010290	15-dehydro-A-norcholestanol	Chol, Sterols	-11.1	0	0	78
1000	LMST01010304	(24E)-24,26-dimethyldesmosterol	Chol, Sterols	-11.1	0	0	82
1001	LMST01010317	22Z-dehydrocholesterol	Chol, Sterols	-11.1	0	0	72
1002	LMST01010324	-	Chol, Sterols	-11.1	0	0	71
1003	LMST01010357	7-OOH-5,8-dien-3beta-ol	Chol, Sterols	-11.1	0	0	90
1004	LMST01031020	Delta8,14-Sterol	DeltaL, Erg, Sterols	-11.1	0	2	80
1005	LMST02030163	16,17-didehydroprogesterone	DeltaL, Steroids, Sterol_Lipids	-11.1	0	0	51
1006	LMST01040145	Isofucosterol	DeltaL, Sterols	-11.1	0	3	67
1007	LMST01030126	6-Deoxotyphasterol	Erg, Sterols	-11.1	1	0	103
1008	LMST01031032	Verongulasterol	Erg, Sterols	-11.1	0	2	110
1009	LMST01031038	Isoxestospongesterol	Erg, Sterols	-11.1	0	2	82
1010	LMST01031067	-	Erg, Sterols	-11.1	0	1	96
1011	LMST01031071	StoloniferoneA	Erg, Sterols	-11.1	0	1	90
1012	LMST01031073	StoloniferoneC	Erg, Sterols	-11.1	0	1	101
1013	LMST01031085	ConicasterolB	Erg, Sterols	-11.1	0	1	90
1014	LMST01031115	22S-hydroxycampesterol	Erg, Sterols	-11.1	0	0	93
1015	LMST01031194	-	Erg, Sterols	-11.1	0	1	66
1016	LMST01031195	-	Erg, Sterols	-11.1	1	2	83
1017	LMST02030120	Cortisoneacetate	Steroids, Sterol_Lipids	-11.1	0	1	73
1018	LMST01060043	KlyflaccisteroidM	Sterol_Lipids	-11.1	0	0	98
1019	LMST03010028	1alpha-hydroxyvitaminD2/1alpha-hydroxyergocalciferol	Sterol_Lipids	-11.1	0	2	95
1020	LMST03010029	24-hydroxyvitaminD2	Sterol_Lipids	-11.1	0	0	67
1021	LMST03010055	1alpha,24,25,28-tetrahydroxyvitaminD2/1alpha,24,25,28-tetrahydroxyergocalciferol	Sterol_Lipids	-11.1	0	0	80
1022	LMST03010065	26,27-Dihomo-1alpha-hydroxyvitaminD2	Sterol_Lipids	-11.1	0	1	96
1023	LMST03020013	1alpha-hydroxy-24,25,26,27-tetranorvitaminD323-carboxylicacid/calcitroicacid	Sterol_Lipids	-11.1	0	0	66
1024	LMST03020014	1alpha-hydroxy-24,25,26,27-tetranorvitaminD3/1alpha-hydroxy-24,25,26,27-tetranorcholecalciferol	Sterol_Lipids	-11.1	0	0	65
1025	LMST03020015	(22R)-22-hydroxy-24,25,26,27-tetranorvitaminD3/(22R)-22-hydroxy-24,25,26,27-tetranorcholecalciferol	Sterol_Lipids	-11.1	0	0	50
1026	LMST03020017	(5E)-(22R)-22-hydroxy-24,25,26,27-tetranorvitaminD3/(5E)-(22R)-22-hydroxy-24,25,26,27-tetranorcholecalciferol	Sterol_Lipids	-11.1	0	0	54
1027	LMST03020026	1alpha-hydroxy-21-nor-20-oxavitaminD3/1alpha-hydroxy-21-nor-20-oxacholecalciferol	Sterol_Lipids	-11.1	0	0	76
1028	LMST03020030	1alpha,25-dihydroxy-24-nor-22-oxavitaminD3/1alpha,25-dihydroxy-24-nor-22-oxacholecalciferol	Sterol_Lipids	-11.1	0	0	87
1029	LMST03020033	25,26-epoxy-1alpha-hydroxy-23,23,24,24-tetradehydro-19-norvitaminD3/25,26-epoxy-1alpha-hydroxy-23,23,24,24-tetradehydro-19-norcholecalciferol	Sterol_Lipids	-11.1	0	0	58
1030	LMST03020051	(5Z)-1alpha,25-dihydroxy-3-deoxy-3-thiavitaminD33-oxide/(5Z)-1alpha,25-dihydroxy-3-deoxy-3-thiacholecalciferol3-oxide	Sterol_Lipids	-11.1	0	0	72
1031	LMST03020060	1alpha,25-dihydroxy-22-oxavitaminD3/1alpha,25-dihydroxy-22-oxacholecalciferol	Sterol_Lipids	-11.1	0	0	66
1032	LMST03020065	(24R)-1alpha,24,25-trihydroxy-22-oxavitaminD3/(24R)-1alpha,24,25-trihydroxy-22-oxacholecalciferol	Sterol_Lipids	-11.1	0	0	72
1033	LMST03020149	(22Z)-1alpha-hydroxy-22,23-didehydrovitaminD3/(22Z)-1alpha-hydroxy-22,23-didehydrocholecalciferol	Sterol_Lipids	-11.1	0	1	82
1034	LMST03020151	1alpha-hydroxy-24,25-didehydrovitaminD3/1alpha-hydroxy-24,25-didehydrocholecalciferol	Sterol_Lipids	-11.1	0	0	84
1035	LMST03020166	(23S)-1alpha,23-dihydroxy-25,26-didehydrovitaminD3/(23S)-1alpha,23-dihydroxy-25,26-didehydrocholecalciferol	Sterol_Lipids	-11.1	0	0	76
1036	LMST03020203	(5Z,10E)-19-fluoro-1alpha-hydroxyvitamin-D3/(5Z,10E)-19-fluoro-1alpha-hydroxycholecalciferol	Sterol_Lipids	-11.1	0	0	79
1037	LMST03020215	24R-fluoro-1alpha,25-dihydroxyvitaminD3/24R-fluoro-1alpha,25-dihydroxycholecalciferol	Sterol_Lipids	-11.1	0	0	88
1038	LMST03020238	2alpha-hydroxyvitaminD3/2alpha-hydroxycholecalciferol	Sterol_Lipids	-11.1	0	0	75
1039	LMST03020266	1beta,25-dihydroxy-3-epivitaminD3/1beta,25-dihydroxy-3-epicholecalciferol	Sterol_Lipids	-11.1	0	1	67
1040	LMST03020299	24,25,26-trihydroxyvitaminD3/24,25,26-trihydroxycholecalciferol	Sterol_Lipids	-11.1	0	0	75
1041	LMST03020307	toxisterol3R1/6,19-dihydrovitaminD3/6,19-dihydrocholecalciferol	Sterol_Lipids	-11.1	0	0	72
1042	LMST03020345	1beta,25-dihydroxy-1alpha-methylvitaminD3/1beta,25-dihydroxy-1alpha-methylcholecalciferol	Sterol_Lipids	-11.1	0	0	76
1043	LMST03020393	11alpha-ethynyl-1alpha,25-dihydroxyvitaminD3/11alpha-ethynyl-1alpha,25-dihydroxycholecalciferol	Sterol_Lipids	-11.1	0	1	103
1044	LMST03020404	1alpha,25-dihydroxy-11alpha-vinylvitaminD3/1alpha,25-dihydroxy-11alpha-vinylcholecalciferol	Sterol_Lipids	-11.1	0	0	82
1045	LMST03020406	1alpha,25-dihydroxy-22,23-didehydro-24a,24b-dihomovitaminD3/1alpha,25-dihydroxy-22,23-didehydro-24a,24b-dihomocholecalciferol	Sterol_Lipids	-11.1	0	1	87
1046	LMST03020408	18-acetoxy-1alpha-hydroxyvitaminD3/18-acetoxy-1alpha-hydroxycholecalciferol	Sterol_Lipids	-11.1	0	0	88
1047	LMST03020416	(6S)-6,19-ethano-25-hydroxy-6,19-dihydrovitaminD3/(6S)-6,19-ethano-25-hydroxy-6,19-dihydrocholecalciferol	Sterol_Lipids	-11.1	0	0	87
1048	LMST03020435	(20S)-1alpha,20,25-trihydroxy-24a,24b-dihomovitaminD3/(20S)-1alpha,20,25-trihydroxy-24a,24b-dihomocholecalciferol	Sterol_Lipids	-11.1	0	0	108
1049	LMST03020446	(22E,24E,24bE)-1alpha,25-dihydroxy-22,23,24,24a,24b,24c-hexadehydro-24a,24b,24c-trihomovitaminD3/(22E,24E,24bE)-1alpha,25-dihydroxy-22,23,24,24a,24b,24c-hexadehydro-24a,24b,24c-trihomocholecalciferol	Sterol_Lipids	-11.1	0	0	91
1050	LMST03020469	26,27-diethyl-1alpha,25-dihydroxy-22-oxavitaminD3/26,27-diethyl-1alpha,25-dihydroxy-22-oxacholecalciferol	Sterol_Lipids	-11.1	0	0	96
1051	LMST03020500	1alpha,25-dihydroxy-2beta-(4-hydroxybutyl)vitaminD3/1alpha,25-dihydroxy-2beta-(4-hydroxybutyl)cholecalciferol	Sterol_Lipids	-11.1	0	3	116
1052	LMST03020523	(20S)-1alpha,25-dihydroxy-20-methoxy-26,27-diethylvitaminD3/(20S)-1alpha,25-dihydroxy-20-methoxy-26,27-diethylcholecalciferol	Sterol_Lipids	-11.1	0	2	130
1053	LMST03020540	1alpha,25-dihydroxy-25,25-diphenyl-26,27-dinorvitaminD3/1alpha,25-dihydroxy-25,25-diphenyl-26,27-dinorcholecalciferol	Sterol_Lipids	-11.1	0	1	85
1054	LMST03020552	1alpha,25-dihydroxy-2alpha-methyl-19-norvitaminD3/1alpha,25-dihydroxy-2alpha-methyl-19-norcholecalciferol	Sterol_Lipids	-11.1	0	0	66
1055	LMST03020609	25-HydroxyvitaminD3-bromoacetate	Sterol_Lipids	-11.1	0	0	62
1056	LMST03020661	19-Hydroxy-10S,19-dihydrovitaminD3	Sterol_Lipids	-11.1	0	0	80
1057	LMST03020686	(1S)-1-hydroxy-23-oxo-24,25,26,27-tetranorcalciol	Sterol_Lipids	-11.1	0	0	74
1058	LMST03020688	-	Sterol_Lipids	-11.1	0	0	60
1059	LMST04010002	Lithocholicacid	Sterol_Lipids	-11.1	0	0	68
1060	LMST04010127	-	Sterol_Lipids	-11.1	0	0	68
1061	LMST04010198	-	Sterol_Lipids	-11.1	0	1	67
1062	LMST04010199	-	Sterol_Lipids	-11.1	0	0	66
1063	LMST04010201	-	Sterol_Lipids	-11.1	0	0	71
1064	LMST04010205	-	Sterol_Lipids	-11.1	0	1	61
1065	LMST04010207	-	Sterol_Lipids	-11.1	0	0	62
1066	LMST04010216	-	Sterol_Lipids	-11.1	0	0	67
1067	LMST04010217	-	Sterol_Lipids	-11.1	0	0	77
1068	LMST04010236	-	Sterol_Lipids	-11.1	0	0	68
1069	LMST04010279	-	Sterol_Lipids	-11.1	0	0	74
1070	LMST04010284	-	Sterol_Lipids	-11.1	0	0	73
1071	LMST04010292	-	Sterol_Lipids	-11.1	0	0	68
1072	LMST04010320	-	Sterol_Lipids	-11.1	0	0	73
1073	LMST04010321	-	Sterol_Lipids	-11.1	0	0	63
1074	LMST04010379	-	Sterol_Lipids	-11.1	0	0	68
1075	LMST04010393	-	Sterol_Lipids	-11.1	0	0	59
1076	LMST04010416	-	Sterol_Lipids	-11.1	0	0	72
1077	LMST04010429	-	Sterol_Lipids	-11.1	0	0	69
1078	LMST04030011	-	Sterol_Lipids	-11.1	0	0	92
1079	LMST04030050	-	Sterol_Lipids	-11.1	0	1	98
1080	LMST04030077	-	Sterol_Lipids	-11.1	0	0	97
1081	LMST04030113	-	Sterol_Lipids	-11.1	0	0	89
1082	LMST04030124	-	Sterol_Lipids	-11.1	0	2	75
1083	LMST04030130	-	Sterol_Lipids	-11.1	0	1	100
1084	LMST04030146	3beta,7alpha-dihydroxycholest-5-en-27-oicacid	Sterol_Lipids	-11.1	0	0	96
1085	LMST04030183	3alpha,7alpha,22S-trihydroxy-5alpha-cholestan-26-oicacid	Sterol_Lipids	-11.1	0	1	106
1086	LMST04030213	-	Sterol_Lipids	-11.1	0	1	83
1087	LMST04070028	Homocholicacid	Sterol_Lipids	-11.1	0	0	77
1088	LMST05020054	GracilosulfateD	Sterol_Lipids	-11.1	0	0	103
1089	LMST05020055	GracilosulfateE	Sterol_Lipids	-11.1	0	0	105
1090	LMST05030020	Taurolithocholicacid	Sterol_Lipids	-11.1	0	1	92
1091	LMST01040130	Poriferasterol	Sterols	-11.1	0	1	78
1092	LMST01040191	NorselicacidB	Sterols	-11.1	0	0	82
1093	LMST01040257	halosterolB	Sterols	-11.1	0	0	89
1094	LMST01040266	Stigmastanol	Sterols	-11.1	0	2	82
1095	LMST01040270	(20S)-Stigmasta-5-ene-3beta,7alpha,20-triol	Sterols	-11.1	0	1	112
1096	LMST01050019	24-Isopropenylcholesterol	Sterols	-11.1	0	1	83
1097	LMST01060005	-	Sterols	-11.1	0	2	73
1098	LMST01080036	Neotokorogenin	Sterols	-11.1	0	1	80
1099	LMST01130002	Scillirosidin	Sterols	-11.1	1	2	68
1100	LMST01130015	11alpha-hydroxymarinobufagin	Sterols	-11.1	0	1	61
1101	LMST01150003	tomatidine	Sterols	-11.1	0	1	82
1102	LMST01150006	Verazine	Sterols	-11.1	0	1	71
1103	LMST01160001	15beta-HydroxynicandrinB	Sterols	-11.1	0	0	69
1104	LMST01160008	Minabeolide-7	Sterols	-11.1	0	2	72
1105	ZINC000000538415	Tamibarotene	World_NOT_FDA	-11.1	2	0	68
1106	ZINC000000898237	Rutaecarpine	World_NOT_FDA	-11.1	0	0	44
1107	ZINC000003774999		World_NOT_FDA	-11.1	1	0	87
1108	ZINC000003830790	17-Alpha-EthinylEstradiol	World_NOT_FDA	-11.1	0	0	45
1109	ZINC000003873362		World_NOT_FDA	-11.1	0	0	46
1110	ZINC000003977751		World_NOT_FDA	-11.1	0	0	50
1111	ZINC000004175569	Domperidone	World_NOT_FDA	-11.1	1	0	71
1112	ZINC000004428527	Desoxycortone	World_NOT_FDA	-11.1	0	0	58
1113	ZINC000090647712		World_NOT_FDA	-11.1	1	1	58
1114	ZINC000100036919	Candoxatril	World_NOT_FDA	-11.1	1	0	85
1115	ZINC000253733842		World_NOT_FDA	-11.1	1	0	83
1116	ZINC000000643138	nizoral	FDA	-11.1	2	3	108
1117	ZINC000001557161	trp-trp	Metab	-11.1	3	0	92
1118	ZINC000001557163	trp-trp	Metab	-11.1	2	0	92
1119	ZINC000002563650	isoglycycoumarin	Metab	-11.1	1	0	47
1120	ZINC000004083606	hydroxyprogesterone	FDA	-11.1	1	0	72
1121	ZINC000004474460	VitaminD3	Metab, FDA	-11.1	1	0	75
1122	ZINC000004521924	trans-vitamind3	Metab	-11.1	1	0	73
1123	ZINC000004521925	trans-vitamind3	Metab	-11.1	0	0	77
1124	ZINC000005762784	7,26-dhxyclso	Metab	-11.1	1	2	71
1125	ZINC000005976902	4-hydroxycholesterol	Metab	-11.1	0	1	94
1126	ZINC000006036395	3beta-Hydroxy-5-cholestenoicacid	Metab	-11.1	0	0	69
1127	ZINC000006416346	Parkeol	Metab	-11.1	0	2	96
1128	ZINC000012493944	3-oxo-4,6-choladienoate	Metab	-11.1	1	0	69
1129	ZINC000012494489	VitaminD3	Metab	-11.1	1	0	75
1130	ZINC000013512287	7,26-dhxyclso	Metab	-11.1	1	0	75
1131	ZINC000013831130	raltegravir	FDA	-11.1	2	0	74
1132	ZINC000040164220	3alpha,7alpha-Dihydroxycoprostanicacid	Metab	-11.1	1	1	85
1133	ZINC000052509366	zelboraf	FDA	-11.1	0	0	84
1134	ZINC000056874533	7alpha,24-dihydroxy-4-cholesten-3-one	Metab	-11.1	0	0	68
1135	ZINC000087493021	n-(9-oxofluoren-3-yl)-acetamide	Metab	-11.1	0	0	71
1136	ZINC000095618410	beta-Sitostenone	Metab	-11.1	0	0	70
1137	ZINC000100018594	trosec	FDA	-11.1	0	0	57
1138	ZINC000100051144	yellowaamx	Metab	-11.1	1	0	60
1139	ZINC000100060554	cholestenone	Metab	-11.1	0	1	67
1140	ZINC000118937138	isomangiferolicacid	Metab	-11.1	0	2	90
1141	ZINC000253505157	Butyrospermone	Metab	-11.1	0	4	100
1142	ZINC000256430531	Stigmastane-3,6-dione	Metab	-11.1	0	0	80
1143	ZINC000256434185	(6beta,24R)-6-Hydroxystigmast-4-en-3-one	Metab	-11.1	0	0	78
1144	ZINC000257446275	(3beta,5alpha,22E,24S)-Stigmasta-7,22,25-trien-3-ol	Metab	-11.1	0	0	79
1145	ZINC000257446277	(3beta,5alpha,22E,24S)-Stigmasta-7,22,25-trien-3-ol	Metab	-11.1	0	1	93
1146	ZINC000257531046	GanoderalA	Metab	-11.1	0	2	74
1147	ZINC000257799604	22-Dehydroclerosterol	Metab	-11.1	0	0	59
1148	LMST02020061	-	Androgens, Steroids, Sterol_Lipids	-11	0	0	38
1149	LMST01010002	25-hydroxy-cholesterol(d3)	Chol, Sterols	-11	0	0	91
1150	LMST01010180	2-dehydroecdysone	Chol, Sterols	-11	1	1	82
1151	LMST01010203	4beta-(hydroxymethyl)-4alpha-methyl-5alpha-cholest-7-en-3beta-ol	Chol, Sterols	-11	0	2	77
1152	LMST01010212	25-Azacholesterol	Chol, Sterols	-11	0	0	74
1153	LMST01010234	-	Chol, Sterols	-11	0	1	93
1154	LMST01010242	8-Dehydrocholesterol	Chol, Sterols	-11	0	1	76
1155	LMST01010250	-	Chol, Sterols	-11	0	0	82
1156	LMST01010268	15beta-hydroxycholestene	Chol, Sterols	-11	1	0	86
1157	LMST01010274	19-hydroxycholesterol	Chol, Sterols	-11	0	0	84
1158	LMST01010277	-	Chol, Sterols	-11	0	1	90
1159	LMST01010311	-	Chol, Sterols	-11	0	1	74
1160	LMST01010332	-	Chol, Sterols	-11	0	3	77
1161	LMST01010351	4,6-cholestadienol	Chol, Sterols	-11	0	0	65
1162	LMST01010359	15beta-hydroxycholestane	Chol, Sterols	-11	0	1	81
1163	LMST01010388	4beta-methyl-zymosterol-4alpha-carboxylicacid	Chol, Sterols	-11	0	1	83
1164	LMST01010460	7alpha-hydroperoxycholesterol	Chol, Sterols	-11	0	1	87
1165	LMST01080048	delta5-Convallamarogenin	DeltaL, Sterols	-11	0	2	79
1166	LMST01031021	Dinosterol	Erg, Sterols	-11	0	3	96
1167	LMST01031024	-	Erg, Sterols	-11	0	0	72
1168	LMST01031044	Ficisterol	Erg, Sterols	-11	0	0	69
1169	LMST01031047	23-methylene-24-methylcholestanol	Erg, Sterols	-11	0	3	96
1170	LMST01031062	-	Erg, Sterols	-11	0	1	96
1171	LMST01031075	(20S,24S)-ThornasterolB	Erg, Sterols	-11	1	3	78
1172	LMST02010036	17alpha-Ethinylestradiol	Steroids, Sterol_Lipids	-11	0	0	42
1173	LMST02010040	Estradioldipropionate	Steroids, Sterol_Lipids	-11	0	1	71
1174	LMST02030237	ArthriniumsteroidC	Steroids, Sterol_Lipids	-11	0	2	75
1175	LMST01060041	KlyflaccisteroidK	Sterol_Lipids	-11	0	1	92
1176	LMST01160038	NicansteroidinC	Sterol_Lipids	-11	0	4	99
1177	LMST01160042	PhysagulinA	Sterol_Lipids	-11	0	2	96
1178	LMST03020007	1alpha-hydroxy-22-oxo-23,24,25,26,27-pentanorvitaminD3/1alpha-hydroxy-22-oxo-23,24,25,26,27-pentanorcholecalciferol	Sterol_Lipids	-11	0	0	69
1179	LMST03020025	1alpha-hydroxy-26,27-dinorvitaminD325-carboxylicacid/1alpha-hydroxy-26,27-dinorcholecalciferol25-carboxylicacid	Sterol_Lipids	-11	0	0	86
1180	LMST03020082	(22E)-26,26,26,27,27,27-hexafluoro-1alpha,25-dihydroxy-22,23-didehydrovitaminD3/(22E)-26,26,26,27,27,27-hexafluoro-1alpha,25-dihydroxy-22,23-didehydrocholecalciferol	Sterol_Lipids	-11	0	1	88
1181	LMST03020083	(23E)-26,26,26,27,27,27-hexafluoro-1alpha,25-dihydroxy-23,24-didehydrovitaminD3/(23E)-26,26,26,27,27,27-hexafluoro-1alpha,25-dihydroxy-23,24-didehydrocholecalciferol	Sterol_Lipids	-11	0	3	95
1182	LMST03020094	25,26-epoxy-1alpha-hydroxy-23,23,24,24-tetradehydrovitaminD3/25,26-epoxy-1alpha-hydroxy-23,23,24,24-tetradehydrocholecalciferol	Sterol_Lipids	-11	0	1	83
1183	LMST03020111	(23R)-1alpha,25-dihydroxy-22,23,23,24-tetradehydrovitaminD3/(23R)-1alpha,25-dihydroxy-22,23,23,24-tetradehydrocholecalciferol	Sterol_Lipids	-11	0	1	92
1184	LMST03020112	(23S)-1alpha,25-dihydroxy-22,23,23,24-tetradehydrovitaminD3/(23S)-1alpha,25-dihydroxy-22,23,23,24-tetradehydrocholecalciferol	Sterol_Lipids	-11	0	1	96
1185	LMST03020128	(20R,24S)-20-fluoro-1alpha,24-dihydroxy-26,27-cyclovitaminD3/(20R,24S)-20-fluoro-1alpha,24-dihydroxy-26,27-cyclocholecalciferol	Sterol_Lipids	-11	0	0	73
1186	LMST03020142	(5Z)-4,4-difluoro-1alpha,25-dihydroxyvitaminD3/(5Z)-4,4-difluoro-1alpha,25-dihydroxycholecalciferol	Sterol_Lipids	-11	0	0	70
1187	LMST03020143	23,23-difluoro-1alpha,25-dihydroxyvitaminD3/23,23-difluoro-1alpha,25-dihydroxycholecalciferol	Sterol_Lipids	-11	0	0	84
1188	LMST03020148	(22E)-1beta-hydroxy-22,23-didehydrovitaminD3/(22E)-1beta-hydroxy-22,23-didehydrocholecalciferol	Sterol_Lipids	-11	0	1	82
1189	LMST03020168	(22E)-(24S)-1alpha,24-dihydroxy-22,23-didehydrovitaminD3/(22E)-(24S)-1alpha,24-dihydroxy-22,23-didehydrocholecalciferol	Sterol_Lipids	-11	0	0	88
1190	LMST03020178	(22E)-(24S)-24,25-dihydroxy-22,23-didehydrovitaminD3/(22E)-(24S)-24,25-dihydroxy-22,23-didehydrocholecalciferol	Sterol_Lipids	-11	0	0	68
1191	LMST03020204	(5E,10Z)-19-fluoro-1alpha-hydroxyvitamin-D3/(5E,10Z)-19-fluoro-1alpha-hydroxycholecalciferol	Sterol_Lipids	-11	0	0	78
1192	LMST03020207	(24R)-25-fluoro-24-hydroxyvitaminD3/(24R)-25-fluoro-24-hydroxycholecalciferol	Sterol_Lipids	-11	0	0	76
1193	LMST03020211	(10Z)-19-fluoro-1alpha,25-dihydroxyvitaminD3/(10Z)-19-fluoro-1alpha,25-dihydroxycholecalciferol	Sterol_Lipids	-11	0	0	79
1194	LMST03020220	(5E)-3-epivitaminD3/(5E)-3-epicholecalciferol	Sterol_Lipids	-11	0	0	73
1195	LMST03020226	toxisterol3E1	Sterol_Lipids	-11	0	0	63
1196	LMST03020239	2beta-hydroxyvitaminD3/2beta-hydroxycholecalciferol	Sterol_Lipids	-11	0	0	70
1197	LMST03020241	astrogorgiadiolB	Sterol_Lipids	-11	0	0	70
1198	LMST03020256	(24S)-1alpha,24-dihydroxyvitaminD3/(24S)-1alpha,24-dihydroxycholecalciferol	Sterol_Lipids	-11	0	0	100
1199	LMST03020257	1alpha,25-dihydroxyvitaminD3/1alpha,25-dihydroxycholecalciferol/calcitriol	Sterol_Lipids	-11	0	1	80
1200	LMST03020276	(6R)-6,19-epidioxy-1alpha-hydroxy-6,19-dihydrovitaminD3/(6R)-6,19-epidioxy-1alpha-hydroxy-6,19-dihydrocholecalciferol	Sterol_Lipids	-11	0	0	75
1201	LMST03020283	1alpha,25-dihydroxy-24a-homo-22-oxa-20-epivitaminD3/1alpha,25-dihydroxy-24a-homo-22-oxa-20-epicholecalciferol	Sterol_Lipids	-11	0	0	73
1202	LMST03020286	1alpha,11alpha,25-trihydroxyvitaminD3/1alpha,11alpha,25-trihydroxycholecalciferol	Sterol_Lipids	-11	0	0	82
1203	LMST03020290	(22R)-1alpha,22,25-trihydroxy-20-epivitaminD3/(22R)-1alpha,22,25-trihydroxy-20-epicholecalciferol	Sterol_Lipids	-11	0	0	76
1204	LMST03020317	(22E)-(25S)-25-hydroxy-26-methyl-22,23-didehydrovitaminD3/(22E)-(25S)-25-hydroxy-26-methyl-22,23-didehydrocholecalciferol	Sterol_Lipids	-11	0	0	72
1205	LMST03020330	6-methylvitaminD3/6-methylcholecalciferol	Sterol_Lipids	-11	0	0	73
1206	LMST03020371	1alpha,25-dihydroxy-26,27-dimethyl-22-thiavitaminD3/1alpha,25-dihydroxy-26,27-dimethyl-22-thiacholecalciferol	Sterol_Lipids	-11	0	0	83
1207	LMST03020382	1alpha,25-dihydroxy-26,27-dimethyl-22-oxavitaminD3/1alpha,25-dihydroxy-26,27-dimethyl-22-oxacholecalciferol	Sterol_Lipids	-11	0	0	103
1208	LMST03020388	(23R)-1alpha,23,25-trihydroxy-23-methylvitaminD3/(23R)-1alpha,23,25-trihydroxy-23-methylcholecalciferol	Sterol_Lipids	-11	0	0	79
1209	LMST03020421	1alpha,25-dihydroxy-24a,24b-dihomo-20-epivitaminD3/1alpha,25-dihydroxy-24a,24b-dihomo-20-epicholecalciferol	Sterol_Lipids	-11	0	1	105
1210	LMST03020422	1alpha,25-dihydroxy-24a-homo-26,27-dimethyl-22-thiavitaminD3/1alpha,25-dihydroxy-24a-homo-26,27-dimethyl-22-thiacholecalciferol	Sterol_Lipids	-11	0	0	95
1211	LMST03020444	(17Z)-1alpha,25-dihydroxy-26,27-dimethyl-17,20,22,22,23,23-hexadehydro-24a-homovitaminD3/(17Z)-1alpha,25-dihydroxy-26,27-dimethyl-17,20,22,22,23,23-hexadehydro-24a-homocholecalciferol	Sterol_Lipids	-11	0	0	80
1212	LMST03020445	1alpha,25-dihydroxy-26,27-dimethyl-20,21,22,22,23,23-hexadehydro-24a-homovitaminD3/1alpha,25-dihydroxy-26,27-dimethyl-20,21,22,22,23,23-hexadehydro-24a-homocholecalciferol	Sterol_Lipids	-11	0	1	96
1213	LMST03020457	1alpha,25-dihydroxy-22,23-didehydro-24a,24b,24c-trihomovitaminD3/1alpha,25-dihydroxy-22,23-didehydro-24a,24b,24c-trihomocholecalciferol	Sterol_Lipids	-11	0	0	91
1214	LMST03020480	1alpha,25-dihydroxy-(26,26)-(27,27)-diethanovitaminD3/1alpha,25-dihydroxy-(26,26)-(27,27)-diethanocholecalciferol	Sterol_Lipids	-11	0	1	95
1215	LMST03020493	(5E,10E)-19-(3-carboxylpropyl)vitaminD3/(5E,10E)-19-(3-carboxylpropyl)cholecalciferol	Sterol_Lipids	-11	0	0	98
1216	LMST03020657	3-Fluoro-9,10-secocholesta-5,7,10(19)-triene	Sterol_Lipids	-11	0	0	80
1217	LMST03020669	7-Dehydrocholesterol5,6-oxide	Sterol_Lipids	-11	0	0	72
1218	LMST03030004	3-epi-5,6-trans-25-HydroxyvitaminD3	Sterol_Lipids	-11	0	0	76
1219	LMST03050002	VitaminD7	Sterol_Lipids	-11	0	2	92
1220	LMST04010006	-	Sterol_Lipids	-11	0	0	67
1221	LMST04010013	-	Sterol_Lipids	-11	0	0	66
1222	LMST04010018	-	Sterol_Lipids	-11	0	0	78
1223	LMST04010054	-	Sterol_Lipids	-11	0	0	80
1224	LMST04010152	-	Sterol_Lipids	-11	0	0	65
1225	LMST04010155	-	Sterol_Lipids	-11	0	0	55
1226	LMST04010200	-	Sterol_Lipids	-11	0	0	69
1227	LMST04010260	-	Sterol_Lipids	-11	0	0	55
1228	LMST04010282	-	Sterol_Lipids	-11	0	0	66
1229	LMST04010287	-	Sterol_Lipids	-11	0	1	65
1230	LMST04010289	-	Sterol_Lipids	-11	0	0	46
1231	LMST04010335	-	Sterol_Lipids	-11	0	0	71
1232	LMST04010407	-	Sterol_Lipids	-11	0	1	73
1233	LMST04010426	-	Sterol_Lipids	-11	0	0	72
1234	LMST04030049	-	Sterol_Lipids	-11	0	1	105
1235	LMST04030166	7alpha,24S-dihydroxycholesterol	Sterol_Lipids	-11	0	0	92
1236	LMST04030246	7alpha,24S-Dihydroxy-3-oxocholest-4-en-26-oicacid	Sterol_Lipids	-11	0	0	100
1237	LMST05020010	24-methylene-cholesterolsulfate	Sterol_Lipids	-11	0	0	43
1238	LMST05020057	GracilosulfateG	Sterol_Lipids	-11	0	0	105
1239	LMST01040121	-	Sterols	-11	0	3	75
1240	LMST01040138	-	Sterols	-11	0	1	76
1241	LMST01040143	-	Sterols	-11	0	1	78
1242	LMST01040161	Strongylosterol	Sterols	-11	0	1	79
1243	LMST01040167	Saringosterol	Sterols	-11	0	0	84
1244	LMST01040178	-	Sterols	-11	0	1	91
1245	LMST01040189	NorselicacidA	Sterols	-11	0	1	77
1246	LMST01040193	geodisterol-O-sulfite	Sterols	-11	1	1	85
1247	LMST01040195	22S-hydroxysitosterol	Sterols	-11	0	0	86
1248	LMST01080030	Protometagenin	Sterols	-11	0	4	80
1249	LMST01080039	KaratavegeninC	Sterols	-11	0	2	83
1250	LMST01080073	Hongguanggenin	Sterols	-11	0	1	81
1251	LMST01090010	Isonuatigenin	Sterols	-11	0	2	74
1252	LMST01100032	24R,25,30-trihydroxy-9,19-cycloartane-3-one	Sterols	-11	0	1	89
1253	LMST01110017	-	Sterols	-11	0	3	107
1254	LMST01120009	adonitoxigenin	Sterols	-11	2	1	65
1255	LMST01130010	BufohydrolideA	Sterols	-11	0	0	60
1256	LMST01130011	BufohydrolideB	Sterols	-11	0	1	67
1257	LMST01130033	Desacetylcinobufagin	Sterols	-11	1	1	69
1258	LMST01130061	Psi-bufarenoginL-lactate	Sterols	-11	1	2	96
1259	LMST01160009	Minabeolide-8	Sterols	-11	0	2	96
1260	LMST01160015	Physapubenolide	Sterols	-11	0	4	91
1261	ZINC000000537802	Glisolamide	World_NOT_FDA	-11	2	1	71
1262	ZINC000003917722	Argatroban	World_NOT_FDA	-11	2	0	94
1263	ZINC000004081771	Testolactone	World_NOT_FDA	-11	0	0	33
1264	ZINC000077269415	AbirateroneSulfate	World_NOT_FDA	-11	0	0	61
1265	ZINC000095618861	BuspironeN-Oxide	World_NOT_FDA	-11	1	0	68
1266	ZINC000100054527	4-Trans-Hydroxyglyburide	World_NOT_FDA	-11	4	3	111
1267	ZINC000000000903	alprazolam	FDA	-11	0	2	50
1268	ZINC000001554274	rilpivirine	FDA	-11	0	1	59
1269	ZINC000001557162	trp-trp	Metab	-11	2	1	92
1270	ZINC000001557164	trp-trp	Metab	-11	1	0	89
1271	ZINC000003815424	mestranol	FDA	-11	3	0	50
1272	ZINC000004023792	3a,17a-Dihydroxy-5b-androstane	Metab	-11	0	0	53
1273	ZINC000004023794	3a,17a-Dihydroxy-5b-androstane	Metab	-11	1	0	53
1274	ZINC000004096609	5alpha-Cholesta-7,24-dien-3beta-ol	Metab	-11	1	2	85
1275	ZINC000004096710	3b,5a,6b-Cholestanetriol	Metab	-11	1	0	79
1276	ZINC000004096811	20-hydroxycholesterol	Metab	-11	2	0	77
1277	ZINC000004175377	3b,17b-Dihydroxyetiocholane	Metab	-11	1	0	59
1278	ZINC000004215814	a-coprostanol	Metab	-11	1	2	66
1279	ZINC000005854553	(±)-2',4',5,7-Tetrahydroxy-3',8-diprenylisoflavanone	Metab	-11	1	0	78
1280	ZINC000006036201	glycolithocholate	Metab	-11	0	2	68
1281	ZINC000008217105	3a,7a,12a-Trihydroxy-5b-cholestan-26-al	Metab	-11	0	1	69
1282	ZINC000008219971	27-Deoxy-5b-cyprinol	Metab	-11	1	2	69
1283	ZINC000012495190	7alpha-Hydroxycholesterol	Metab	-11	0	0	80
1284	ZINC000013512028	dihydroxycoprostane	Metab	-11	0	0	72
1285	ZINC000013543186	7a,12a-dihydroxy-5a-cholestan-3-one	Metab	-11	1	1	70
1286	ZINC000013986658	idelalisib	FDA	-11	0	0	88
1287	ZINC000014727602	5,7,3',4'-tetrahydroxy-6,5'-diprenylisoflavone	Metab	-11	1	0	74
1288	ZINC000030729365	glyceolliniii	Metab	-11	1	0	44
1289	ZINC000030729696	5-Dehydroavenasterol	Metab	-11	0	0	83
1290	ZINC000030729824	(22alpha)-hydroxy-5alpha-campestan-3-one	Metab	-11	1	1	71
1291	ZINC000033650236	TauroursodeoxycholicAcid	Metab	-11	2	2	99
1292	ZINC000033970417	stigmast-4-en-6beta-ol-3-one	Metab	-11	0	0	93
1293	ZINC000040164488	5-alpha-Dihydrotestosteroneglucuronide	Metab	-11	3	2	98
1294	ZINC000054991825	thaumatinb,recombinant	Metab	-11	0	0	45
1295	ZINC000056871169	3a,7a-Dihydroxy-5b-cholestan-26-al	Metab	-11	2	0	82
1296	ZINC000056871170	3a,7a-Dihydroxy-5b-cholestan-26-al	Metab	-11	2	0	85
1297	ZINC000095616937	dasabuvir	FDA	-11	2	2	76
1298	ZINC000095619724	yellowaamx	Metab	-11	0	0	60
1299	ZINC000252310898	Quebrachidine	Metab	-11	1	0	62
1300	ZINC000256078661	3-Hydroxystigmast-5-en-7-one	Metab	-11	0	1	84
1301	ZINC000256428815	Grandiflorolicacid	Metab	-11	3	0	56
1302	ZINC000256434199	(6beta,24R)-6-Hydroxystigmast-4-en-3-one	Metab	-11	0	0	97
1303	ZINC000256458898	Ikshusterol	Metab	-11	0	0	78
1304	ZINC000257373528	Ganodermanondiol	Metab	-11	2	5	91
1305	ZINC000257398170	31-Norcyclolaudenone	Metab	-11	0	2	71
1306	ZINC000257410707	Isomangiferolicacid	Metab	-11	0	3	89
1307	ZINC000257410708	Isomangiferolicacid	Metab	-11	1	3	100
1308	LMST02020012	Methandriol	Androgens, Steroids, Sterol_Lipids	-10.9	0	0	42
1309	LMST02020044	Stenbolone	Androgens, Steroids, Sterol_Lipids	-10.9	0	1	49
1310	LMST05010041	Cholesterolglucuronide	Androgens, Steroids, Sterol_Lipids	-10.9	0	1	80
1311	LMST05010045	Deoxycholicacid3-glucuronide	Androgens, Steroids, Sterol_Lipids	-10.9	0	0	96
1312	LMST01010098	Epi-cholestanol	Chol, Sterols	-10.9	0	2	75
1313	LMST01010128	24S,25-dihydroxycholesterol	Chol, Sterols	-10.9	0	0	90
1314	LMST01010169	zymosterolintermediate1a	Chol, Sterols	-10.9	0	0	88
1315	LMST01010251	-	Chol, Sterols	-10.9	0	1	94
1316	LMST01010330	-	Chol, Sterols	-10.9	0	2	75
1317	LMST01010342	17(20)-Dehydrocryptogenin	Chol, Sterols	-10.9	0	1	75
1318	LMST01010419	GanoweberianicacidG	Chol, Sterols	-10.9	3	2	107
1319	LMST01010450	7beta,25-dihydroxycholesterol	Chol, Sterols	-10.9	1	0	103
1320	LMST01010459	7beta-hydroperoxycholesterol	Chol, Sterols	-10.9	0	1	95
1321	LMST01030101	Obtusifoliol	Erg, Sterols	-10.9	0	2	84
1322	LMST01030106	-	Erg, Sterols	-10.9	0	3	86
1323	LMST01030127	6-Deoxocastasterone	Erg, Sterols	-10.9	1	1	112
1324	LMST01031035	Xestosterol	Erg, Sterols	-10.9	0	0	86
1325	LMST01031048	-	Erg, Sterols	-10.9	0	0	64
1326	LMST01031076	(20S,24R)-ThornasterolB	Erg, Sterols	-10.9	0	2	78
1327	LMST01031154	DaturmetesideB	Erg, Sterols	-10.9	1	0	110
1328	LMST02030225	HDOPA	Steroids, Sterol_Lipids	-10.9	0	1	52
1329	LMST02030252	Bixasteroid	Steroids, Sterol_Lipids	-10.9	0	0	47
1330	LMST03010014	(5E)-vitaminD2/5,6-trans-vitaminD2/(5E)-ergocalciferol/(5E)-ercalciol	Sterol_Lipids	-10.9	0	0	68
1331	LMST03010031	24-epi-25-hydroxyvitaminD2/24-epi-25-hydroxyergocalciferol	Sterol_Lipids	-10.9	0	0	66
1332	LMST03010032	1alpha,25-dihydroxy-20-epivitaminD2/1alpha,25-dihydroxy-20-epiergocalciferol	Sterol_Lipids	-10.9	0	1	78
1333	LMST03010036	(6R)-6,19-epidioxy-6,19-dihydrovitaminD2/(6R)-6,19-epidioxy-6,19-dihydroergocalciferol	Sterol_Lipids	-10.9	0	0	77
1334	LMST03010040	1alpha,25-dihydroxyvitaminD2/1alpha,,25-dihydroxyergocalciferol	Sterol_Lipids	-10.9	0	1	79
1335	LMST03010042	5(E)-1alpha,25-dihydroxyvitaminD2/5(E)-1alpha,25-dihydroxyergocalciferol	Sterol_Lipids	-10.9	0	0	76
1336	LMST03010053	1alpha,25,28-trihydroxyvitaminD2/1alpha,25,28-trihydroxyergocalciferol	Sterol_Lipids	-10.9	0	0	79
1337	LMST03010054	(24R)-1alpha,24,25,26-tetrahydroxyvitaminD2/(24R)-1alpha,24,25,26-tetrahydroxyergocalciferol	Sterol_Lipids	-10.9	0	1	79
1338	LMST03020002	20-oxo-22,23,24,25,26,27-hexanorvitaminD3/20-oxo-22,23,24,25,26,27-hexanorcholecalciferol	Sterol_Lipids	-10.9	0	0	60
1339	LMST03020006	(20S)-1alpha,20-dihydroxy-22,23,24,25,26,27-hexanorvitaminD3/(20S)-1alpha,20-dihydroxy-22,23,24,25,26,27-hexanorcholecalciferol	Sterol_Lipids	-10.9	0	0	63
1340	LMST03020021	cholacalcioicacid/25,26,27-trinorvitaminD324-carboxylicacid/25,26,27-trinorcholecalciferol24-carboxylicacid	Sterol_Lipids	-10.9	0	0	58
1341	LMST03020027	1alpha,25-dihydroxy-23,24-dinorvitaminD3/1alpha,25-dihydroxy-23,24-dinorcholecalciferol	Sterol_Lipids	-10.9	0	0	79
1342	LMST03020028	1alpha,25-dihydroxy-26,27-dinorvitaminD3/1alpha,25-dihydroxy-26,27-dinorcholecalciferol	Sterol_Lipids	-10.9	0	0	86
1343	LMST03020042	1beta,25-dihydroxy-3-deoxy-3-thiavitaminD3/1beta,25-dihydroxy-3-deoxy-3-thiacholecalciferol	Sterol_Lipids	-10.9	0	0	72
1344	LMST03020047	1alpha,25-dihydroxy-19-norprevitaminD3/1alpha,25-dihydroxy-19-norprecholecalciferol	Sterol_Lipids	-10.9	0	0	69
1345	LMST03020048	1alpha,25-dihydroxy-21-norvitaminD3/1alpha,25-dihydroxy-21-norcholecalciferol	Sterol_Lipids	-10.9	0	0	78
1346	LMST03020053	1alpha,25-dihydroxy-22-thiavitaminD3/1alpha,25-dihydroxy-22-thiacholecalciferol	Sterol_Lipids	-10.9	0	0	70
1347	LMST03020054	1alpha,25-dihydroxy-22-thia-20-epivitaminD3/1alpha,25-dihydroxy-22-thia-20-epicholecalciferol	Sterol_Lipids	-10.9	0	0	84
1348	LMST03020061	1alpha,25-dihydroxy-22-oxa-20-epivitaminD3/1alpha,25-dihydroxy-22-oxa-20-epicholecalciferol	Sterol_Lipids	-10.9	0	0	79
1349	LMST03020069	25-azavitaminD3/25-azacholecalciferol	Sterol_Lipids	-10.9	0	0	61
1350	LMST03020098	(22E)-(25R)-26,26,26-trifluoro-1alpha,25-dihydroxy-22,23-didehydrovitaminD3/(22E)-(25R)-26,26,26-trifluoro-1alpha,25-dihydroxy-22,23-didehydrocholecalciferol	Sterol_Lipids	-10.9	0	1	92
1351	LMST03020107	(22E)-(24R)-1alpha,24-dihydroxy-26,27-cyclo-22,23-didehydro-20-epivitaminD3/(22E)-(24R)-1alpha,24-dihydroxy-26,27-cyclo-22,23-didehydro-20-epicholecalciferol	Sterol_Lipids	-10.9	0	0	68
1352	LMST03020108	(22E)-(24S)-1alpha,24-dihydroxy-26,27-cyclo-22,23-didehydro-20-epivitaminD3/(22E)-(24S)-1alpha,24-dihydroxy-26,27-cyclo-22,23-didehydro-20-epicholecalciferol	Sterol_Lipids	-10.9	0	0	69
1353	LMST03020160	25,26-epoxy-1alpha-hydroxyvitaminD3/25,26-epoxy-1alpha-hydroxycholecalciferol	Sterol_Lipids	-10.9	0	1	90
1354	LMST03020198	(10E)-19-fluorovitaminD3/(10E)-19-fluorocholecalciferol	Sterol_Lipids	-10.9	0	0	73
1355	LMST03020199	(5E,10Z)-19-fluorovitaminD3/(5E,10Z)-19-fluorocholecalciferol	Sterol_Lipids	-10.9	0	0	71
1356	LMST03020206	25-fluoro-1alpha-hydroxyvitaminD3/25-fluoro-1alpha-hydroxycholecalciferol	Sterol_Lipids	-10.9	0	0	78
1357	LMST03020222	tachysterol3	Sterol_Lipids	-10.9	0	0	77
1358	LMST03020227	-	Sterol_Lipids	-10.9	0	0	81
1359	LMST03020237	(5E)-1beta-hydroxy-3-epivitaminD3/(5E)-1beta-hydroxy-3-epicholecalciferol	Sterol_Lipids	-10.9	0	0	76
1360	LMST03020240	1alpha,25-dihydroxy-3-deoxyvitaminD3/1alpha,25-dihydroxy-3-deoxycholecalciferol	Sterol_Lipids	-10.9	0	1	74
1361	LMST03020261	1alpha,25-dihydroxy-20-epivitaminD3/1alpha,25-dihydroxy-20-epicholecalciferol	Sterol_Lipids	-10.9	0	0	74
1362	LMST03020262	1alpha,25-dihydroxy-24a-homo-22-thiavitaminD3/1alpha,25-dihydroxy-24a-homo-22-thiacholecalciferol	Sterol_Lipids	-10.9	0	0	80
1363	LMST03020265	1beta,25-dihydroxyvitaminD3/1beta,25-dihydroxycholecalciferol	Sterol_Lipids	-10.9	0	0	78
1364	LMST03020267	18,25-dihydroxyvitaminD3/18,25-dihydroxycholecalciferol	Sterol_Lipids	-10.9	0	0	86
1365	LMST03020288	1alpha,18,25-trihydroxyvitaminD3/1alpha,18,25-trihydroxycholecalciferol	Sterol_Lipids	-10.9	0	0	70
1366	LMST03020291	(23S)-1alpha,23,25-trihydroxyvitaminD3/(23S)-1alpha,23,25-trihydroxycholecalciferol	Sterol_Lipids	-10.9	0	0	92
1367	LMST03020306	dihydrotachysterol3/(5E)-(10S)-10,19-dihydrovitaminD3/(5E)-(10S)-10,19-dihydrocholecalciferol	Sterol_Lipids	-10.9	0	0	105
1368	LMST03020313	(22E,24E)-1alpha,25-dihydroxy-22,23,24,24a-tetradehydro-24a-homovitaminD3/(22E,24E)-1alpha,25-dihydroxy-22,23,24,24a-tetradehydro-24a-homocholecalciferol	Sterol_Lipids	-10.9	0	0	76
1369	LMST03020348	2alpha-methyl-3-epi-1alpha,25-dihydroxyvitaminD3/2alpha-methyl-3-epi-1alpha,25-dihydroxycholecalciferol	Sterol_Lipids	-10.9	0	0	84
1370	LMST03020363	1alpha,25-dihydroxy-11beta-methylvitaminD3/1alpha,25-dihydroxy-11beta-methylcholecalciferol	Sterol_Lipids	-10.9	0	0	85
1371	LMST03020370	1alpha,25-dihydroxy-26-methylvitaminD3/1alpha,25-dihydroxy-26-methylcholecalciferol	Sterol_Lipids	-10.9	0	0	107
1372	LMST03020414	1alpha-hydroxy-26,27-dimethylvitaminD3/1alpha-hydroxy-26,27-dimethylcholecalciferol	Sterol_Lipids	-10.9	0	0	94
1373	LMST03020415	25-hydroxy-26,27-dimethylvitaminD3/25-hydroxy-26,27-dimethylcholecalciferol	Sterol_Lipids	-10.9	0	0	90
1374	LMST03020430	1alpha,25-dihydroxy-20,26,27-trimethyl-23-oxavitaminD3/1alpha,25-dihydroxy-20,26,27-trimethyl-23-oxacholecalciferol	Sterol_Lipids	-10.9	0	0	89
1375	LMST03020450	1alpha,25-dihydroxy-26,27-dimethyl-22,22,23,23-tetradehydro-24a-homo-20-epivitaminD3/1alpha,25-dihydroxy-26,27-dimethyl-22,22,23,23-tetradehydro-24a-homo-20-epicholecalciferol	Sterol_Lipids	-10.9	0	1	97
1376	LMST03020476	1alpha,25-dihydroxy-2beta-(3-hydroxypropoxy)vitaminD3/1alpha,25-dihydroxy-2beta-(3-hydroxypropoxy)cholecalciferol	Sterol_Lipids	-10.9	0	0	95
1377	LMST03020482	1alpha,25-dihydroxy-26,27-dimethyl-22,22,23,23-tetradehydro-24a,24b-dihomovitaminD3/1alpha,25-dihydroxy-26,27-dimethyl-22,22,23,23-tetradehydro-24a,24b-dihomocholecalciferol	Sterol_Lipids	-10.9	0	1	119
1378	LMST03020520	1alpha,25-dihydroxy-26,27-diethyl-24a-homovitaminD3/1alpha,25-dihydroxy-26,27-diethyl-24a-homocholecalciferol	Sterol_Lipids	-10.9	0	0	115
1379	LMST03020584	(20R)-1alpha,25-dihydroxy-20-phenyl-16,17-didehydro-21-norvitaminD3/(20R)-1alpha,25-dihydroxy-20-phenyl-16,17-didehydro-21-norcholecalciferol	Sterol_Lipids	-10.9	0	0	90
1380	LMST03020588	1alpha-hydroxy-18-[m-(1-hydroxy-1-methylethyl)-benzyloxy]-23,24,25,26,27-pentanorvitaminD3/1alpha-hydroxy-18-[m-(1-hydroxy-1-methylethyl)-benzyloxy]-23,24,25,26,27-pentanorcholecalciferol	Sterol_Lipids	-10.9	0	1	116
1381	LMST03020601	2beta-fluoro-1alpha,25-dihydroxyvitaminD3	Sterol_Lipids	-10.9	0	0	86
1382	LMST03020620	ZK159222	Sterol_Lipids	-10.9	0	3	113
1383	LMST03020622	24a,24b-Dihomo-9,10-secocholesta-5,7,10(19),24a-tetraen-1alpha,3,25-triol	Sterol_Lipids	-10.9	0	1	108
1384	LMST03020628	1alpha,25-Dihydroxy-2Z-ethylidene-19-norvitaminD3	Sterol_Lipids	-10.9	0	1	107
1385	LMST03020659	1alpha,25-Dihydroxy-previtaminD3	Sterol_Lipids	-10.9	0	1	99
1386	LMST03020687	(1S)-1-hydroxy-23,24-didehydro-25,26,27-trinorcalciol	Sterol_Lipids	-10.9	0	0	63
1387	LMST04010014	-	Sterol_Lipids	-10.9	0	0	72
1388	LMST04010036	Alloursodeoxycholicacid	Sterol_Lipids	-10.9	0	0	71
1389	LMST04010038	-	Sterol_Lipids	-10.9	0	0	72
1390	LMST04010045	-	Sterol_Lipids	-10.9	0	1	82
1391	LMST04010047	-	Sterol_Lipids	-10.9	0	1	78
1392	LMST04010093	-	Sterol_Lipids	-10.9	0	1	84
1393	LMST04010095	-	Sterol_Lipids	-10.9	0	0	86
1394	LMST04010139	-	Sterol_Lipids	-10.9	0	0	65
1395	LMST04010141	-	Sterol_Lipids	-10.9	0	0	69
1396	LMST04010153	-	Sterol_Lipids	-10.9	0	0	55
1397	LMST04010156	-	Sterol_Lipids	-10.9	0	0	68
1398	LMST04010161	-	Sterol_Lipids	-10.9	0	0	69
1399	LMST04010218	-	Sterol_Lipids	-10.9	0	0	74
1400	LMST04010266	-	Sterol_Lipids	-10.9	0	0	67
1401	LMST04010276	-	Sterol_Lipids	-10.9	0	0	71
1402	LMST04010334	-	Sterol_Lipids	-10.9	0	1	73
1403	LMST04010357	-	Sterol_Lipids	-10.9	0	0	69
1404	LMST04010365	-	Sterol_Lipids	-10.9	0	0	67
1405	LMST04010375	-	Sterol_Lipids	-10.9	0	0	67
1406	LMST04030106	7alpha,25-dihydroxycholestenone	Sterol_Lipids	-10.9	0	1	89
1407	LMST04030171	7alpha,12alpha,24-trihydroxy-5beta-cholestan-3-one	Sterol_Lipids	-10.9	0	0	98
1408	LMST04030172	7alpha,24-dihydroxycholesterol	Sterol_Lipids	-10.9	0	1	87
1409	LMST05030006	3a,7b,12a-Trihydroxyoxocholanyl-Glycine	Sterol_Lipids	-10.9	0	0	88
1410	LMST01040120	7-dehydrositosterol	Sterols	-10.9	0	1	69
1411	LMST01040129	Sitosterol	Sterols	-10.9	0	1	74
1412	LMST01040134	-	Sterols	-10.9	0	1	94
1413	LMST01040159	28-methylxestosterol	Sterols	-10.9	0	1	83
1414	LMST01040175	(20S,24S)-24-ethylthornasterol	Sterols	-10.9	0	3	83
1415	LMST01040238	8(14)-Stigmastenol	Sterols	-10.9	0	0	90
1416	LMST01040242	24-Ethyllophenol	Sterols	-10.9	0	2	82
1417	LMST01040258	Ikshusterol	Sterols	-10.9	1	1	79
1418	LMST01040277	12alpha-hydroxySitosterol	Sterols	-10.9	0	1	74
1419	LMST01050015	24-ethyl-24-methyl-cholesterol	Sterols	-10.9	0	1	82
1420	LMST01080004	Digitogenin	Sterols	-10.9	0	1	75
1421	LMST01080016	Digalogenin	Sterols	-10.9	0	2	75
1422	LMST01080024	Solagenin	Sterols	-10.9	1	2	78
1423	LMST01080051	Solaspigenin	Sterols	-10.9	0	0	81
1424	LMST01100004	-	Sterols	-10.9	0	0	76
1425	LMST01130035	Desacetylcinobufotalin	Sterols	-10.9	1	2	69
1426	LMST01160034	ParaminabeolideA	Sterols	-10.9	0	2	74
1427	ZINC000000537804	Glisoxepide	World_NOT_FDA	-10.9	2	0	79
1428	ZINC000000586239	Levocabastin	World_NOT_FDA	-10.9	0	2	75
1429	ZINC000000968279	Troglitazone	World_NOT_FDA	-10.9	1	1	59
1430	ZINC000002526765	Cypermethrin	World_NOT_FDA	-10.9	0	0	51
1431	ZINC000002570882	4-Hydroxyalprazolam	World_NOT_FDA	-10.9	0	1	52
1432	ZINC000003977985	Flumetasone	World_NOT_FDA	-10.9	1	2	76
1433	ZINC000004095717	Harzol	World_NOT_FDA	-10.9	0	0	80
1434	ZINC000004212915	DichlorisoneAcetate	World_NOT_FDA	-10.9	2	1	86
1435	ZINC000038611810	6alpha,9alpha-Difluoroprednisolone-17-Butyrate	World_NOT_FDA	-10.9	3	2	82
1436	ZINC000040164488		World_NOT_FDA	-10.9	0	1	81
1437	ZINC000095619124	3-Cis-HydroxycyclohexylGlyburide	World_NOT_FDA	-10.9	5	0	116
1438	ZINC000000537805	diabeta	FDA	-10.9	3	2	94
1439	ZINC000000601317	difenoxin	FDA	-10.9	2	0	101
1440	ZINC000001532098	asana	Metab	-10.9	0	0	81
1441	ZINC000001532099	asana	Metab	-10.9	0	0	85
1442	ZINC000001532100	asana	Metab	-10.9	0	0	81
1443	ZINC000002384327	1-phenyl-4-(1-phenylethyl)tetralin	Metab	-10.9	0	0	53
1444	ZINC000003816287	axitinib	FDA	-10.9	2	0	75
1445	ZINC000003820029	trajenta	FDA	-10.9	1	1	98
1446	ZINC000003927200	yaz	FDA	-10.9	0	4	56
1447	ZINC000003985982	inspra	FDA	-10.9	0	1	72
1448	ZINC000004082125	kopeodin	Metab	-10.9	2	0	58
1449	ZINC000004097705	silandrin	Metab	-10.9	1	1	91
1450	ZINC000004175630	orap	FDA	-10.9	1	1	71
1451	ZINC000004654858	24(r)-hydoxycholesterol	Metab	-10.9	0	0	82
1452	ZINC000005380738	kopeodin	Metab	-10.9	2	0	56
1453	ZINC000005380740	kopeodin	Metab	-10.9	2	0	57
1454	ZINC000005844788	Nebivolol	FDA	-10.9	1	0	70
1455	ZINC000006036227	b-lithocholate	Metab	-10.9	1	1	78
1456	ZINC000006036234	7-oxodeoxycholate	Metab	-10.9	1	1	60
1457	ZINC000006920437	7-Ketocholesterol	Metab	-10.9	0	1	61
1458	ZINC000008551674	17a-estradiol3-glucuronide	Metab	-10.9	2	0	73
1459	ZINC000011617039	pazopanib	FDA	-10.9	3	0	77
1460	ZINC000011679756	eltrombopag	FDA	-10.9	0	3	102
1461	ZINC000013130928	glabrone	Metab	-10.9	0	0	37
1462	ZINC000013449465	5-o-desmethyldonepezil	Metab	-10.9	0	0	57
1463	ZINC000013526758	7alpha-Hydroxycholesterol	Metab	-10.9	1	1	80
1464	ZINC000015214245	kopeodin	Metab	-10.9	2	0	59
1465	ZINC000030729733	methylcholestanone	Metab	-10.9	0	0	66
1466	ZINC000040164261	5a-Cholestane-3a,7a,12a,25-tetrol	Metab	-10.9	1	2	85
1467	ZINC000049952219	5alpha-cholestane	Metab	-10.9	0	0	64
1468	ZINC000059230365	ethylbenzylamine	Metab	-10.9	0	2	69
1469	ZINC000096014365	22-Dehydroclerosterol	Metab	-10.9	0	4	73
1470	ZINC000253390052	(ent-7alpha)-7-Hydroxy-8(14),15-pimaradien-19-oicacid	Metab	-10.9	2	0	56
1471	ZINC000253506556	Chenodeoxycholicacidglycineconjugate	Metab	-10.9	0	0	77
1472	ZINC000253589639	Ganodermanontriol	Metab	-10.9	1	3	89
1473	ZINC000253590165	GanoderolA	Metab	-10.9	0	4	84
1474	ZINC000256078660	3-Hydroxystigmast-5-en-7-one	Metab	-10.9	0	1	85
1475	ZINC000257799624	GanodericacidDM	Metab	-10.9	3	2	109
1476	LMST02020107	Mesterolone	Androgens, Steroids, Sterol_Lipids	-10.8	0	0	52
1477	LMST02020112	17-hydroxy-androstan-1,3-dione	Androgens, Steroids, Sterol_Lipids	-10.8	0	0	46
1478	LMST05010024	17alpha-estradiol3-glucosiduronicacid	Androgens, Steroids, Sterol_Lipids	-10.8	0	2	81
1479	LMST01010481	Calibagenin	Chol, Sterol_Lipids	-10.8	0	0	86
1480	LMST01010087	24,25-dihydrolanosterol	Chol, Sterols	-10.8	0	0	91
1481	LMST01010123	1,25-Dihydroxycholesterol	Chol, Sterols	-10.8	0	0	88
1482	LMST01010223	-	Chol, Sterols	-10.8	0	1	98
1483	LMST01010226	-	Chol, Sterols	-10.8	0	1	94
1484	LMST01010229	-	Chol, Sterols	-10.8	0	1	91
1485	LMST01010231	-	Chol, Sterols	-10.8	0	1	88
1486	LMST01010232	-	Chol, Sterols	-10.8	0	1	94
1487	LMST01010302	-	Chol, Sterols	-10.8	0	0	56
1488	LMST01010306	Echissaposterol	Chol, Sterols	-10.8	0	1	74
1489	LMST01010347	Dihydromarthasterone	Chol, Sterols	-10.8	1	2	75
1490	LMST01010418	GanoweberianicacidF	Chol, Sterols	-10.8	3	3	105
1491	LMST01010448	cholesterylbeta-D-xyloside	Chol, Sterols	-10.8	0	2	116
1492	LMST01010464	7alpha,12alpha,(25R)26-Trihydroxycholest-4-en-3-one	Chol, Sterols	-10.8	0	0	103
1493	LMST02030164	16,17-didehydropregnenolone	DeltaL, Steroids, Sterol_Lipids	-10.8	0	0	45
1494	LMST01031222	Sarcophytosterol	Erg, Sterol_Lipids	-10.8	0	1	78
1495	LMST01030143	-	Erg, Sterols	-10.8	0	3	87
1496	LMST01030148	-	Erg, Sterols	-10.8	0	2	89
1497	LMST01031089	-	Erg, Sterols	-10.8	2	0	81
1498	LMST01031098	StoloniferoneL	Erg, Sterols	-10.8	0	2	92
1499	LMST01031108	-	Erg, Sterols	-10.8	1	1	71
1500	LMST01031173	Ergosteryl-3beta-O-L-aspartate	Erg, Sterols	-10.8	0	1	100
1501	LMST02010039	Estradiolvalerate	Steroids, Sterol_Lipids	-10.8	0	0	60
1502	LMST01100033	Cycloart-23-ene-3beta,25-diolmethylether	Sterol_Lipids	-10.8	0	2	90
1503	LMST01100036	GalaxaurolC	Sterol_Lipids	-10.8	0	4	96
1504	LMST01160036	NicansteroidinA	Sterol_Lipids	-10.8	0	4	110
1505	LMST03010044	1beta,25-dihydroxyvitaminD2/1beta,25-dihydroxyergocalciferol	Sterol_Lipids	-10.8	0	0	76
1506	LMST03010052	(25S)-1alpha,25,26-trihydroxyvitaminD2/(25S)-1alpha,25,26-trihydroxyergocalciferol	Sterol_Lipids	-10.8	0	0	76
1507	LMST03010056	dihydrotachysterol2/(5E)-(10S)-10,19-dihydrovitaminD2/(5E)-(10S)-10,19-dihydroergocalciferol	Sterol_Lipids	-10.8	0	4	88
1508	LMST03020023	1alpha,24-dihydroxy-25,26,27-trinorvitaminD3/1alpha,24-dihydroxy-25,26,27-trinorcholecalciferol	Sterol_Lipids	-10.8	0	0	67
1509	LMST03020029	1alpha,25-dihydroxy-21-nor-20-oxavitaminD3/1alpha,25-dihydroxy-21-nor-20-oxacholecalciferol	Sterol_Lipids	-10.8	0	0	82
1510	LMST03020044	1alpha-hydroxy-22-oxavitaminD3/1alpha-hydroxy-22-oxacholecalciferol	Sterol_Lipids	-10.8	0	0	75
1511	LMST03020059	(24S)-1alpha,24-dihydroxy-22-oxa-20-epivitaminD3/(24S)-1alpha,24-dihydroxy-22-oxa-20-epicholecalciferol	Sterol_Lipids	-10.8	0	0	80
1512	LMST03020066	(24S)-1alpha,24,25-trihydroxy-22-oxavitaminD3/(24S)-1alpha,24,25-trihydroxy-22-oxacholecalciferol	Sterol_Lipids	-10.8	0	0	68
1513	LMST03020067	(25R)-1alpha,25,26-trihydroxy-22-oxavitaminD3/(25R)-1alpha,25,26-trihydroxy-22-oxacholecalciferol	Sterol_Lipids	-10.8	0	0	75
1514	LMST03020072	24-(dimethoxyphosphoryl)-25,26,27-trinorvitaminD3/24-(dimethoxyphosphoryl)-25,26,27-trinorcholecalciferol	Sterol_Lipids	-10.8	0	0	74
1515	LMST03020095	25,26-epoxy-1alpha-hydroxy-23,23,24,24-tetradehydro-20-epivitaminD3/25,26-epoxy-1alpha-hydroxy-23,23,24,24-tetradehydro-20-epicholecalciferol	Sterol_Lipids	-10.8	0	0	77
1516	LMST03020096	1alpha,25-dihydroxy-16,17,23,23,24,24-hexadehydrovitaminD3/1alpha,25-dihydroxy-16,17,23,23,24,24-hexadehydrocholecalciferol	Sterol_Lipids	-10.8	0	2	88
1517	LMST03020097	9,14,19,19,19-pentadeuterio-1alpha,25-dihydroxyprevitaminD3/9,14,19,19,19-pentadeuterio-1alpha,25-dihydroxyprecholecalciferol	Sterol_Lipids	-10.8	0	0	67
1518	LMST03020105	(22E)-(24R)-1alpha,24-dihydroxy-26,27-cyclo-22,23-didehydrovitaminD3/(22E)-(24R)-1alpha,24-dihydroxy-26,27-cyclo-22,23-didehydrocholecalciferol	Sterol_Lipids	-10.8	0	0	66
1519	LMST03020113	1alpha,25-dihydroxy-23,23,24,24-tetradehydrovitaminD3/1alpha,25-dihydroxy-23,23,24,24-tetradehydrocholecalciferol	Sterol_Lipids	-10.8	0	2	93
1520	LMST03020132	(25S)-26,26,26-trifluoro-1alpha,25-dihydroxyvitaminD3/(25S)-26,26,26-trifluoro-1alpha,25-dihydroxycholecalciferol	Sterol_Lipids	-10.8	0	0	81
1521	LMST03020161	24,25-epoxy-1alpha-hydroxy-23,23-dimethyl-26,27-dinorvitaminD3/24,25-epoxy-1alpha-hydroxy-23,23-dimethyl-26,27-dinorcholecalciferol	Sterol_Lipids	-10.8	0	0	81
1522	LMST03020176	(17S,20R)-1alpha,25-dihydroxy-17,20-methano-21-norvitaminD3/(17S,20R)-1alpha,25-dihydroxy-17,20-methano-21-norcholecalciferol	Sterol_Lipids	-10.8	0	0	63
1523	LMST03020177	(22E)-(24R)-24,25-dihydroxy-22,23-didehydrovitaminD3/(22E)-(24R)-24,25-dihydroxy-22,23-didehydrocholecalciferol	Sterol_Lipids	-10.8	0	0	66
1524	LMST03020183	(24S,25S)-25,26-epoxy-1alpha,24-dihydroxyvitaminD3/(24S,25S)-25,26-epoxy-1alpha,24-dihydroxycholecalciferol	Sterol_Lipids	-10.8	0	0	65
1525	LMST03020186	(23S)-23,25-dihydroxy-24-oxovitaminD3/(23S)-23,25-dihydroxy-24-oxocholecalciferol	Sterol_Lipids	-10.8	0	0	81
1526	LMST03020212	(10E)-19-fluoro-1alpha,25-dihydroxyvitaminD3/(10E)-19-fluoro-1alpha,25-dihydroxycholecalciferol	Sterol_Lipids	-10.8	0	1	83
1527	LMST03020216	1alpha-hydroxy-3-deoxyvitaminD3/1alpha-hydroxy-3-deoxycholecalciferol	Sterol_Lipids	-10.8	0	0	81
1528	LMST03020217	3-epivitaminD3/3-epicholecalciferol	Sterol_Lipids	-10.8	0	0	69
1529	LMST03020219	(5E)-vitaminD3/(5E)-cholecalciferol/(5E)-calciol	Sterol_Lipids	-10.8	0	0	65
1530	LMST03020223	isotachysterol3	Sterol_Lipids	-10.8	0	1	74
1531	LMST03020252	-	Sterol_Lipids	-10.8	0	0	73
1532	LMST03020282	1alpha,25-dihydroxy-24a-homo-22-oxavitaminD3/1alpha,25-dihydroxy-24a-homo-22-oxacholecalciferol	Sterol_Lipids	-10.8	0	1	85
1533	LMST03020285	1alpha,2,25-trihydroxyvitaminD3/1alpha,2,25-trihydroxycholecalciferol	Sterol_Lipids	-10.8	0	0	68
1534	LMST03020294	(5E)-(25R)-1alpha,25,26-trihydroxyvitaminD3/(5E)-(25R)-1alpha,25,26-trihydroxycholecalciferol	Sterol_Lipids	-10.8	0	0	76
1535	LMST03020362	1alpha,25-dihydroxy-11alpha-methylvitaminD3/1alpha,25-dihydroxy-11alpha-methylcholecalciferol	Sterol_Lipids	-10.8	0	0	81
1536	LMST03020365	1alpha,25-dihydroxy-24a-homovitaminD3/1alpha,25-dihydroxy-24a-homocholecalciferol	Sterol_Lipids	-10.8	0	0	75
1537	LMST03020398	(22R)-1alpha,22,25-trihydroxy-23,24-tetradehydro-24a,24b-dihomo-20-epivitaminD3/(22R)-1alpha,22,25-trihydroxy-23,24-tetradehydro-24a,24b-dihomo-20-epicholecalciferol	Sterol_Lipids	-10.8	0	1	93
1538	LMST03020417	(6R)-6,19-ethano-25-hydroxy-6,19-dihydrovitaminD3/(6R)-6,19-ethano-25-hydroxy-6,19-dihydrocholecalciferol	Sterol_Lipids	-10.8	0	2	90
1539	LMST03020418	11alpha-ethyl-1alpha,25-dihydroxyvitaminD3/11alpha-ethyl-1alpha,25-dihydroxycholecalciferol	Sterol_Lipids	-10.8	0	1	73
1540	LMST03020434	(22R)-1alpha,22,25-trihydroxy-24a,24b-dihomo-20-epivitaminD3/(22R)-1alpha,22,25-trihydroxy-24a,24b-dihomo-20-epicholecalciferol	Sterol_Lipids	-10.8	0	2	95
1541	LMST03020455	(22S)-1alpha,22,25-trihydroxy-26,27-dimethyl-23,24-tetradehydro-24a-homo-20-epivitaminD3/(22S)-1alpha,22,25-trihydroxy-26,27-dimethyl-23,24-tetradehydro-24a-homo-20-epicholecalciferol	Sterol_Lipids	-10.8	0	0	114
1542	LMST03020468	1alpha,25-dihydroxy-2beta-(3-hydroxypropyl)vitaminD3/1alpha,25-dihydroxy-2beta-(3-hydroxypropyl)cholecalciferol	Sterol_Lipids	-10.8	0	1	96
1543	LMST03020478	1alpha-hydroxy-22-[3-(1-hydroxy-1-methylethyl)phenyl]-23,24,25,26,27-pentanorvitaminD3/1alpha-hydroxy-22-[3-(1-hydroxy-1-methylethyl)phenyl]-23,24,25,26,27-pentanorcholecalciferol	Sterol_Lipids	-10.8	0	0	99
1544	LMST03020486	(22S)-1alpha,25-dihydroxy-22-ethoxy-26,27-dimethyl-23,24-tetradehydro-20-epivitaminD3/(22S)-1alpha,25-dihydroxy-22-ethoxy-26,27-dimethyl-23,24-tetradehydro-20-epicholecalciferol	Sterol_Lipids	-10.8	0	0	121
1545	LMST03020501	(20S)-1alpha,25-dihydroxy-20-methoxy-26,27-dimethyl-24a-homovitaminD3/(20S)-1alpha,25-dihydroxy-20-methoxy-26,27-dimethyl-24a-homocholecalciferol	Sterol_Lipids	-10.8	0	0	113
1546	LMST03020508	1alpha,25-dihydroxy-2beta-butoxyvitaminD3/1alpha,25-dihydroxy-2beta-butoxycholecalciferol	Sterol_Lipids	-10.8	0	1	118
1547	LMST03020509	1alpha-hydroxy-23-[3-(1-hydroxy-1-methylethyl)phenyl]-22,22,23,23-tetradehydro-24,25,26,27-tetranorvitaminD3/1alpha-hydroxy-23-[3-(1-hydroxy-1-methylethyl)phenyl]-22,22,23,23-tetradehydro-24,25,26,27-tetranorcholecalciferol	Sterol_Lipids	-10.8	0	0	107
1548	LMST03020512	1alpha,25-dihydroxy-26,27-dimethyl-22,22,23,23-tetradehydro-24a,24b,24c-trihomo-20-epivitaminD3/1alpha,25-dihydroxy-26,27-dimethyl-22,22,23,23-tetradehydro-24a,24b,24c-trihomo-20-epicholecalciferol	Sterol_Lipids	-10.8	0	2	134
1549	LMST03020515	(22R)-1alpha,22,25-trihydroxy-26,27-dimethyl-23,24-tetradehydro-24a,24b,24c-trihomo-20-epivitaminD3/(22R)-1alpha,22,25-trihydroxy-26,27-dimethyl-23,24-tetradehydro-24a,24b,24c-trihomo-20-epicholecalciferol	Sterol_Lipids	-10.8	0	0	135
1550	LMST03020535	11-(4-acetoxymethylphenyl)-1alpha,25-dihydroxy-9,11-didehydrovitaminD3/11-(4-acetoxymethylphenyl)-1alpha,25-dihydroxy-9,11-didehydrocholecalciferol	Sterol_Lipids	-10.8	0	3	118
1551	LMST03020539	2alpha-methyl-1alpha,25-dihydroxyvitaminD3/2alpha-methyl-1alpha,25-dihydroxycholecalciferol	Sterol_Lipids	-10.8	0	4	132
1552	LMST03020573	25-hydroxy-1alpha-hydroxymethyl-26,27-dimethyl-24a-homo-22,23,24,24a-tetradehydrovitaminD3/25-hydroxy-1alpha-hydroxymethyl-26,27-dimethyl-24a-homo-22,23,24,24a-tetradehydrocholecalciferol	Sterol_Lipids	-10.8	0	0	85
1553	LMST03020583	(20S)-20-butyl-1alpha,25-dihydroxy-16,17-didehydro-21-norvitaminD3/(20S)-20-butyl-1alpha,25-dihydroxy-16,17-didehydro-21-norcholecalciferol	Sterol_Lipids	-10.8	0	1	88
1554	LMST03020593	1alpha-hydroxy-18-(5-hydroxy-5-methyl-3-hexynyloxy)-23,24,25,26,27-pentanorvitaminD3/1alpha-hydroxy-18-(5-hydroxy-5-methyl-3-hexynyloxy)-23,24,25,26,27-pentanorcholecalciferol	Sterol_Lipids	-10.8	0	0	102
1555	LMST03020641	EB1129	Sterol_Lipids	-10.8	0	3	92
1556	LMST03020646	24,24-Difluoro-1,25,26-trihydroxyvitaminD3	Sterol_Lipids	-10.8	0	0	66
1557	LMST03020668	11-HydroxyvitaminD3	Sterol_Lipids	-10.8	0	0	82
1558	LMST03020681	EB1213	Sterol_Lipids	-10.8	0	1	80
1559	LMST04010005	-	Sterol_Lipids	-10.8	0	0	64
1560	LMST04010202	-	Sterol_Lipids	-10.8	0	0	51
1561	LMST04010221	-	Sterol_Lipids	-10.8	0	0	61
1562	LMST04010263	-	Sterol_Lipids	-10.8	0	0	62
1563	LMST04010280	-	Sterol_Lipids	-10.8	0	0	73
1564	LMST04010290	-	Sterol_Lipids	-10.8	0	1	72
1565	LMST04010298	-	Sterol_Lipids	-10.8	0	0	70
1566	LMST04010338	-	Sterol_Lipids	-10.8	0	0	60
1567	LMST04010376	-	Sterol_Lipids	-10.8	0	0	65
1568	LMST04010424	-	Sterol_Lipids	-10.8	0	0	56
1569	LMST04010442	3-Oxocholicacid	Sterol_Lipids	-10.8	0	0	55
1570	LMST04010455	BendigoleC	Sterol_Lipids	-10.8	0	1	60
1571	LMST04030080	7alpha,27-dihydroxycholesterol	Sterol_Lipids	-10.8	0	0	98
1572	LMST04030100	-	Sterol_Lipids	-10.8	0	0	94
1573	LMST04030214	7alpha,24S-dihydroxycholest-4-en-3-one	Sterol_Lipids	-10.8	0	3	102
1574	LMST05020022	5alpha-Dihydrotestosteronesulfate	Sterol_Lipids	-10.8	0	0	42
1575	LMST01040141	-	Sterols	-10.8	0	2	82
1576	LMST01040160	Isostelliferasterol	Sterols	-10.8	0	2	85
1577	LMST01040181	TheonellasterolB	Sterols	-10.8	0	2	81
1578	LMST01040247	5beta-stigmastane	Sterols	-10.8	0	0	78
1579	LMST01040276	4alpha,14alpha,23S-trimethyl-sitosterol	Sterols	-10.8	0	4	91
1580	LMST01050018	24-isopropenyl-22E-dehydrocholesterol	Sterols	-10.8	0	2	81
1581	LMST01060008	A-norgorgostanol	Sterols	-10.8	1	1	81
1582	LMST01080034	ConvallageninA	Sterols	-10.8	0	2	68
1583	LMST01080035	ConvallageninB	Sterols	-10.8	1	3	75
1584	LMST01110016	Aragusteroketal	Sterols	-10.8	0	0	98
1585	LMST01160006	Minabeolide-5	Sterols	-10.8	0	2	68
1586	ZINC000000001567	Indoramin	World_NOT_FDA	-10.8	1	0	60
1587	ZINC000000538174	Picotamide	World_NOT_FDA	-10.8	0	0	62
1588	ZINC000003812889	Tibolone	World_NOT_FDA	-10.8	1	0	51
1589	ZINC000003869855	Dicumarol	World_NOT_FDA	-10.8	1	0	43
1590	ZINC000003876080	Testosterone	World_NOT_FDA	-10.8	0	1	77
1591	ZINC000003881556	Estradiol	World_NOT_FDA	-10.8	1	0	63
1592	ZINC000003938633		World_NOT_FDA	-10.8	1	0	57
1593	ZINC000004099004	EstroneGlucuronide	World_NOT_FDA	-10.8	0	1	62
1594	ZINC000004214740	Adinazolam	World_NOT_FDA	-10.8	0	1	53
1595	ZINC000004217252	Penfluridol	World_NOT_FDA	-10.8	0	1	91
1596	ZINC000004521924	Trans-VitaminD3	World_NOT_FDA	-10.8	1	1	72
1597	ZINC000005167145	PregnenoloneSulfate	World_NOT_FDA	-10.8	0	0	55
1598	ZINC000008551674	17a-Estradiol3-Glucuronide	World_NOT_FDA	-10.8	0	1	70
1599	ZINC000009330879	Rebamipide	World_NOT_FDA	-10.8	1	0	49
1600	ZINC000012484965	Alfacalcidol	World_NOT_FDA	-10.8	0	1	79
1601	ZINC000012494489		World_NOT_FDA	-10.8	1	0	66
1602	ZINC000029391220		World_NOT_FDA	-10.8	0	0	73
1603	ZINC000043195321		World_NOT_FDA	-10.8	1	2	82
1604	ZINC000095618851		World_NOT_FDA	-10.8	0	1	57
1605	ZINC000100014880	Benidipine	World_NOT_FDA	-10.8	0	1	110
1606	ZINC000100089496	Levocabastine	World_NOT_FDA	-10.8	0	1	74
1607	ZINC000253617657		World_NOT_FDA	-10.8	1	0	61
1608	ZINC000000538550	ziprasidone	FDA	-10.8	1	0	57
1609	ZINC000000602632	intelence	FDA	-10.8	2	0	68
1610	ZINC000000896560	granisetron	FDA	-10.8	0	0	60
1611	ZINC000000899109	cyclokievitone	Metab	-10.8	0	0	44
1612	ZINC000000899892	phaseolin	Metab	-10.8	0	0	28
1613	ZINC000000968157	d16-progesterone	Metab	-10.8	0	0	44
1614	ZINC000001539579	targretin	FDA	-10.8	0	2	62
1615	ZINC000001851149	abilify	FDA	-10.8	1	0	71
1616	ZINC000002557432	Cholesterol	Metab	-10.8	0	1	61
1617	ZINC000003791929	gamma-tocotrienol	Metab	-10.8	0	1	83
1618	ZINC000003797541	zytiga	FDA	-10.8	0	0	55
1619	ZINC000003872931	avapro	FDA	-10.8	1	0	92
1620	ZINC000003876186	enjuvia	Metab, FDA	-10.8	2	0	52
1621	ZINC000003914812	12-deoxycholylglycine	Metab	-10.8	1	2	83
1622	ZINC000003927822	lurasidone	FDA	-10.8	0	3	87
1623	ZINC000003932831	avodart	FDA	-10.8	0	5	87
1624	ZINC000003936683	solifenacin	FDA	-10.8	0	0	56
1625	ZINC000003973334	aromasin	FDA	-10.8	0	1	38
1626	ZINC000004097107	16-a-hydroxypregnenolone	Metab	-10.8	1	0	49
1627	ZINC000004098608	cyclokievitone	Metab	-10.8	0	0	41
1628	ZINC000004098719	glabridin	Metab	-10.8	2	0	60
1629	ZINC000004538008	epitestosterone	Metab	-10.8	0	0	53
1630	ZINC000005167248	17-hydroxypregnenolonesulfate	Metab	-10.8	0	1	53
1631	ZINC000005758782	8-Dehydrocholesterol	Metab	-10.8	0	1	91
1632	ZINC000013542524	glycoursodeoxycholate	Metab	-10.8	0	0	80
1633	ZINC000013548872	delta7-Avenasterol	Metab	-10.8	0	2	89
1634	ZINC000013548878	Chondrillasterol	Metab	-10.8	0	1	71
1635	ZINC000015206004	murrayanol	Metab	-10.8	0	0	69
1636	ZINC000028646753	Cycloartanol	Metab	-10.8	0	2	81
1637	ZINC000040164545	5-Dehydroepisterol	Metab	-10.8	0	0	68
1638	ZINC000051951647	Panobinostat	FDA	-10.8	2	0	68
1639	ZINC000052716421	flibanserin	FDA	-10.8	0	0	47
1640	ZINC000057509131	N-[4-(4-Indan-2-yl-piperazine-1-sulfonyl)-phenyl]-acetamide	Metab	-10.8	0	0	77
1641	ZINC000058475559	chenodeoxyglycocholate	Metab	-10.8	0	2	86
1642	ZINC000077984859	5,6-trans-25-hydroxyvitamind3	Metab	-10.8	0	1	78
1643	ZINC000104363165	LevistolideA	Metab	-10.8	0	0	47
1644	ZINC000253497582	beta-Sitosterolacetate	Metab	-10.8	0	2	94
1645	ZINC000253609251	alpha-Spinasterol	Metab	-10.8	0	1	74
1646	ZINC000253609252	alpha-Spinasterol	Metab	-10.8	1	0	81
1647	ZINC000253609253	alpha-Spinasterol	Metab	-10.8	1	2	84
1648	ZINC000253609254	delta7-Avenasterol	Metab	-10.8	1	2	72
1649	ZINC000254507526	Ergosterolperoxide	Metab	-10.8	0	1	81
1650	ZINC000256434206	(6beta,24R)-6-Hydroxystigmast-4-en-3-one	Metab	-10.8	0	2	103
1651	ZINC000257507788	3alpha-12-Ursene-3,24-diol	Metab	-10.8	1	5	85
1652	ZINC000257584746	Ergosterolperoxide	Metab	-10.8	0	1	82
1653	LMST02020027	Mestanolone	Androgens, Steroids, Sterol_Lipids	-10.7	0	0	47
1654	LMST02020088	16-Oxoandrostenediol	Androgens, Steroids, Sterol_Lipids	-10.7	2	0	41
1655	LMST02020119	PenicildioneA	Androgens, Steroids, Sterol_Lipids	-10.7	0	0	46
1656	LMST01010085	-	Chol, Sterols	-10.7	0	0	65
1657	LMST01010172	3-dehydroecdysone	Chol, Sterols	-10.7	1	1	75
1658	LMST01010182	2-deoxyecdysone	Chol, Sterols	-10.7	2	1	86
1659	LMST01010201	20S-hydroxycholesterol	Chol, Sterols	-10.7	1	0	64
1660	LMST01010211	20a-hydroxycholesterol	Chol, Sterols	-10.7	1	0	69
1661	LMST01010263	-	Chol, Sterols	-10.7	0	2	92
1662	LMST01010269	15-ketocholestene	Chol, Sterols	-10.7	0	2	84
1663	LMST01010291	19-norcholestanol	Chol, Sterols	-10.7	0	0	74
1664	LMST01010339	-	Chol, Sterols	-10.7	0	2	91
1665	LMST01010341	Cryptogenin	Chol, Sterols	-10.7	0	0	83
1666	LMST01010352	4-cholestenol	Chol, Sterols	-10.7	0	2	85
1667	LMST01010414	GanoweberianicacidB	Chol, Sterols	-10.7	0	3	95
1668	LMST01031214	Calvatianone	Erg, Sterol_Lipids	-10.7	0	1	87
1669	LMST01031223	KlyflaccisteroidA	Erg, Sterol_Lipids	-10.7	0	1	73
1670	LMST01030139	-	Erg, Sterols	-10.7	0	2	85
1671	LMST01030142	-	Erg, Sterols	-10.7	0	3	76
1672	LMST01031017	makisteroneB	Erg, Sterols	-10.7	2	0	88
1673	LMST01031088	-	Erg, Sterols	-10.7	2	0	78
1674	LMST01031153	DaturmetesideE	Erg, Sterols	-10.7	3	3	117
1675	LMST01031164	ArmatinolB	Erg, Sterols	-10.7	0	3	107
1676	LMST01031193	-	Erg, Sterols	-10.7	1	2	74
1677	LMST02010020	-	Steroids, Sterol_Lipids	-10.7	0	0	40
1678	LMST02030093	Cortisol21-acetate	Steroids, Sterol_Lipids	-10.7	0	1	76
1679	LMST02030118	Megestrolacetate	Steroids, Sterol_Lipids	-10.7	0	1	68
1680	LMST02030152	20-hydroxypregn-4-en-3-one	Steroids, Sterol_Lipids	-10.7	0	0	56
1681	LMST02030153	(20R)-20-hydroxypregn-4-en-3-one	Steroids, Sterol_Lipids	-10.7	0	0	57
1682	LMST02030183	(20S)-17,20-dihydroxypregn-4-en-3-one	Steroids, Sterol_Lipids	-10.7	0	0	60
1683	LMST01100037	GalaxaurolD	Sterol_Lipids	-10.7	0	0	92
1684	LMST03010038	-	Sterol_Lipids	-10.7	0	0	77
1685	LMST03010043	5(E)-1alpha,25-dihydroxy-24-epivitaminD2/5(E)-1alpha,25-dihydroxy-24-epiergocalciferol	Sterol_Lipids	-10.7	0	0	73
1686	LMST03010046	5(E)-1beta,25-dihydroxyvitaminD2/1beta,25-dihydroxyergocalciferol	Sterol_Lipids	-10.7	0	0	96
1687	LMST03010047	5(E)-1beta,25-dihydroxy-24-epivitaminD2/5(E)-1beta,25-dihydroxy-24-epiergocalciferol	Sterol_Lipids	-10.7	0	1	92
1688	LMST03010051	(24R)-1alpha,24,25-trihydroxyvitaminD2/(24R)-1alpha,24,25-trihydroxyergocalciferol	Sterol_Lipids	-10.7	0	0	80
1689	LMST03020005	1alpha,17alpha,21-trihydroxy-20-oxo-22,23,24,25,26,27-hexanorvitaminD3/1alpha,17alpha,21-trihydroxy-20-oxo-22,23,24,25,26,27-hexanorcholecalciferol	Sterol_Lipids	-10.7	0	0	74
1690	LMST03020011	1alpha,22-dihydroxy-23,24,25,26,27-pentanorvitaminD3/1alpha,22-dihydroxy-23,24,25,26,27-pentanorcholecalciferol	Sterol_Lipids	-10.7	0	0	68
1691	LMST03020016	(22S)-22-hydroxy-24,25,26,27-tetranorvitaminD3/(22S)-22-hydroxy-23,24,25,26,27-pentanorcholecalciferol	Sterol_Lipids	-10.7	0	0	63
1692	LMST03020038	(24S,25R)-25,26-epoxy-1alpha,24-dihydroxy-27-norvitaminD3/(24S,25R)-25,26-epoxy-1alpha,24-dihydroxy-27-norcholecalciferol	Sterol_Lipids	-10.7	0	0	86
1693	LMST03020043	(5Z)-1,25-dihydroxy-3-thiavitaminD3/(5Z)-1,25-dihydroxy-3-thiacholecalciferol	Sterol_Lipids	-10.7	0	1	75
1694	LMST03020056	(24R)-1alpha,24-dihydroxy-22-oxavitaminD3/(24R)-1alpha,24-dihydroxy-22-oxacholecalciferol	Sterol_Lipids	-10.7	0	0	73
1695	LMST03020057	(24R)-1alpha,24-dihydroxy-22-oxa-20-epivitaminD3/(24R)-1alpha,24-dihydroxy-22-oxa-20-epicholecalciferol	Sterol_Lipids	-10.7	0	0	77
1696	LMST03020093	24,25-epoxy-1alpha-hydroxy-22,22,23,23-tetradehydrovitaminD3/24,25-epoxy-1alpha-hydroxy-22,22,23,23-tetradehydrocholecalciferol	Sterol_Lipids	-10.7	0	2	94
1697	LMST03020158	1alpha-hydroxy-22-oxovitaminD3/1alpha-hydroxy-22-oxocholecalciferol	Sterol_Lipids	-10.7	0	0	74
1698	LMST03020165	-	Sterol_Lipids	-10.7	0	0	72
1699	LMST03020173	1alpha,25-dihydroxy-6,7-didehydroprevitaminD3/1alpha,25-dihydroxy-6,7-didehydroprecholecalciferol	Sterol_Lipids	-10.7	0	3	92
1700	LMST03020184	1alpha,25-dihydroxy-18-oxovitaminD3/1alpha,25-dihydroxy-18-oxocholecalciferol	Sterol_Lipids	-10.7	0	0	69
1701	LMST03020191	(22E)-(25S)-1alpha,25,26-trihydroxy-22,23-didehydrovitaminD3/(22E)-(25S)-1alpha,25,26-trihydroxy-22,23-didehydrocholecalciferol	Sterol_Lipids	-10.7	0	0	96
1702	LMST03020213	(5E,10Z)-19-fluoro-1alpha,25-dihydroxyvitaminD3/(5E,10Z)-19-fluoro-1alpha,25-dihydroxycholecalciferol	Sterol_Lipids	-10.7	0	1	86
1703	LMST03020225	toxisterol3D1	Sterol_Lipids	-10.7	0	1	71
1704	LMST03020230	1alpha-hydroxyvitaminD3/1alpha-hydroxycholecalciferol	Sterol_Lipids	-10.7	0	1	78
1705	LMST03020242	(22S)-22-hydroxyvitaminD3/(22S)-22-hydroxycholecalciferol	Sterol_Lipids	-10.7	0	0	66
1706	LMST03020248	(6S)-6,19-epidioxy-6,19-dihydrovitaminD3/(6S)-6,19-epidioxy-6,19-dihydrocholecalciferol	Sterol_Lipids	-10.7	0	0	71
1707	LMST03020321	(22E)-1alpha,25-dihydroxy-22,23-didehydro-24a-homovitaminD3/(22E)-1alpha,25-dihydroxy-22,23-didehydro-24a-homocholecalciferol	Sterol_Lipids	-10.7	0	0	79
1708	LMST03020349	2beta-methyl-3-epi-1alpha,25-dihydroxyvitaminD3/2beta-methyl-3-epi-1alpha,25-dihydroxycholecalciferol	Sterol_Lipids	-10.7	0	1	73
1709	LMST03020350	2alpha-methyl-1beta,25-dihydroxyvitaminD3/2alpha-methyl-1beta,25-dihydroxycholecalciferol	Sterol_Lipids	-10.7	0	1	74
1710	LMST03020358	2alpha-methyl-20-epi-1beta,25-dihydroxyvitaminD3/2alpha-methyl-20-epi-1beta,25-dihydroxycholecalciferol	Sterol_Lipids	-10.7	0	1	90
1711	LMST03020381	1alpha,25-dihydroxy-24a,24b-dihomo-22-oxa-20-epivitaminD3/1alpha,25-dihydroxy-24a,24b-dihomo-22-oxa-20-epicholecalciferol	Sterol_Lipids	-10.7	0	0	71
1712	LMST03020384	1alpha,25-dihydroxy-24a,24b-dihomo-23-oxa-20-epivitaminD3/1alpha,25-dihydroxy-24a,24b-dihomo-23-oxa-20-epicholecalciferol	Sterol_Lipids	-10.7	0	0	101
1713	LMST03020387	(23R)-1alpha,23,25-trihydroxyvitaminD3/(23R)-1alpha,23,25-trihydroxycholecalciferol	Sterol_Lipids	-10.7	0	0	98
1714	LMST03020438	(22S)-1alpha,22,25-trihydroxy-26,27-dimethylvitaminD3/(22S)-1alpha,22,25-trihydroxy-26,27-dimethylcholecalciferol	Sterol_Lipids	-10.7	0	0	89
1715	LMST03020454	(22S)-1alpha,22,25-trihydroxy-26,27-dimethyl-23,23,24,24-tetradehydro-24a-homovitaminD3/(22S)-1alpha,22,25-trihydroxy-26,27-dimethyl-23,23,24,24-tetradehydro-24a-homocholecalciferol	Sterol_Lipids	-10.7	0	0	104
1716	LMST03020456	24,24-difluoro-1alpha,25-dihydroxy-26,27-dimethyl-24a-homovitaminD3/24,24-difluoro-1alpha,25-dihydroxy-26,27-dimethyl-24a-homocholecalciferol	Sterol_Lipids	-10.7	0	0	110
1717	LMST03020464	1alpha,25-dihydroxy-26,27-dimethyl-24a-homo-20-epivitaminD3/1alpha,25-dihydroxy-26,27-dimethyl-24a-homo-20-epicholecalciferol	Sterol_Lipids	-10.7	0	1	87
1718	LMST03020477	1beta,25-dihydroxy-2beta-(3-hydroxypropoxy)vitaminD3/1beta,25-dihydroxy-2beta-(3-hydroxypropoxy)cholecalciferol	Sterol_Lipids	-10.7	0	0	108
1719	LMST03020484	(22R)-1alpha,25-dihydroxy-22-methoxy-26,27-dimethyl-23,23,24,24-tetradehydro-24a-homovitaminD3/(22R)-1alpha,25-dihydroxy-22-methoxy-26,27-dimethyl-23,23,24,24-tetradehydro-24a-homocholecalciferol	Sterol_Lipids	-10.7	0	0	98
1720	LMST03020527	1alpha,25-dihydroxy-11beta-phenylvitaminD3/1alpha,25-dihydroxy-11beta-phenylcholecalciferol	Sterol_Lipids	-10.7	0	1	147
1721	LMST03020581	(20S)-1alpha,25-dihydroxy-20-phenyl-16,17-didehydro-21-norvitaminD3/(20S)-1alpha,25-dihydroxy-20-phenyl-16,17-didehydro-21-norcholecalciferol	Sterol_Lipids	-10.7	0	1	92
1722	LMST03020591	1alpha-hydroxy-18-(4-hydroxy-4-ethyl-2-hexynyloxy)-23,24,25,26,27-pentanorvitaminD3/1alpha-hydroxy-18-(4-hydroxy-4-ethyl-2-hexynyloxy)-23,24,25,26,27-pentanorcholecalciferol	Sterol_Lipids	-10.7	0	1	99
1723	LMST03020597	(10R)-1alpha,19,25-trihydroxy-10,19-dihydrovitaminD3/(10R)-1alpha,19,25-trihydroxy-10,19-dihydrocholecalciferol	Sterol_Lipids	-10.7	0	1	86
1724	LMST03020605	1,25-Dihydroxy-24-oxo-16-ene-vitaminD3	Sterol_Lipids	-10.7	0	0	79
1725	LMST03020613	GS1500	Sterol_Lipids	-10.7	0	0	105
1726	LMST03020617	3-DeoxyvitaminD3	Sterol_Lipids	-10.7	0	2	144
1727	LMST03020629	(20R)-24-Hydroxy-19-norgeminivitaminD3	Sterol_Lipids	-10.7	0	1	97
1728	LMST03020643	VD2736	Sterol_Lipids	-10.7	0	0	77
1729	LMST03020655	1-HydroxyvitaminD3diacetate	Sterol_Lipids	-10.7	0	0	89
1730	LMST03020662	25-FluorovitaminD3	Sterol_Lipids	-10.7	0	1	77
1731	LMST03020674	1alpha,25-dihydroxy-2alpha-(3-hydroxypropoxy)vitaminD3	Sterol_Lipids	-10.7	0	0	78
1732	LMST03030005	VitaminD5	Sterol_Lipids	-10.7	0	0	79
1733	LMST04010039	Deoxycholicacid	Sterol_Lipids	-10.7	0	0	72
1734	LMST04010056	Vulpecholicacid	Sterol_Lipids	-10.7	0	0	79
1735	LMST04010154	-	Sterol_Lipids	-10.7	0	0	70
1736	LMST04010213	-	Sterol_Lipids	-10.7	0	0	43
1737	LMST04010220	-	Sterol_Lipids	-10.7	0	0	56
1738	LMST04010245	-	Sterol_Lipids	-10.7	0	0	71
1739	LMST04010267	-	Sterol_Lipids	-10.7	0	2	75
1740	LMST04010281	-	Sterol_Lipids	-10.7	0	0	71
1741	LMST04010324	-	Sterol_Lipids	-10.7	0	0	66
1742	LMST04010333	-	Sterol_Lipids	-10.7	0	2	66
1743	LMST04010344	-	Sterol_Lipids	-10.7	0	0	60
1744	LMST04010384	-	Sterol_Lipids	-10.7	0	2	77
1745	LMST04010391	-	Sterol_Lipids	-10.7	0	0	69
1746	LMST04010404	-	Sterol_Lipids	-10.7	0	0	72
1747	LMST04010409	-	Sterol_Lipids	-10.7	0	1	85
1748	LMST04010430	-	Sterol_Lipids	-10.7	0	1	70
1749	LMST04010434	-	Sterol_Lipids	-10.7	0	1	82
1750	LMST04030051	-	Sterol_Lipids	-10.7	0	2	85
1751	LMST04030087	-	Sterol_Lipids	-10.7	0	0	99
1752	LMST04030090	-	Sterol_Lipids	-10.7	0	0	97
1753	LMST04030119	-	Sterol_Lipids	-10.7	0	2	80
1754	LMST04030125	-	Sterol_Lipids	-10.7	0	0	72
1755	LMST04030145	-	Sterol_Lipids	-10.7	0	2	96
1756	LMST04030158	3alpha,7alpha-dihydroxy-5beta-cholestan-26-al	Sterol_Lipids	-10.7	0	0	105
1757	LMST04030243	7alpha,12alpha-dihydroxy-3-oxo-5beta-cholestanoicacid	Sterol_Lipids	-10.7	0	1	79
1758	LMST05020001	Estradiol-17beta3-sulfate	Sterol_Lipids	-10.7	0	0	47
1759	LMST05020014	lithocholicacidsulfate	Sterol_Lipids	-10.7	0	0	58
1760	LMST05020023	Chenodeoxycholicacid3-sulfate	Sterol_Lipids	-10.7	0	0	62
1761	LMST05020052	GracilosulfateB	Sterol_Lipids	-10.7	0	0	107
1762	LMST05020063	25-hydroxy-cholesterol3-sulfate	Sterol_Lipids	-10.7	0	0	94
1763	LMST05030009	-	Sterol_Lipids	-10.7	0	0	77
1764	LMST05030017	3beta-Hydroxy-7-oxochol-5-en-24-oyl-glycine	Sterol_Lipids	-10.7	0	1	78
1765	LMST01040150	-	Sterols	-10.7	0	0	84
1766	LMST01040177	24-hydroperoxy-24-vinylcholesterol	Sterols	-10.7	0	1	84
1767	LMST01040183	TheonellasterolC	Sterols	-10.7	0	1	92
1768	LMST01040184	TheonellasterolE	Sterols	-10.7	0	0	105
1769	LMST01060012	StoloniferoneD	Sterols	-10.7	0	4	100
1770	LMST01080049	Convallamarogenin	Sterols	-10.7	0	2	76
1771	LMST01080098	AsparacosinA	Sterols	-10.7	0	1	71
1772	LMST01160018	Withanolide	Sterols	-10.7	0	0	87
1773	ZINC000000537755	Fluspirilene	World_NOT_FDA	-10.7	0	1	77
1774	ZINC000000968276	Troglitazone	World_NOT_FDA	-10.7	2	1	68
1775	ZINC000000968278	Troglitazone	World_NOT_FDA	-10.7	2	1	67
1776	ZINC000002563085	Estradiol	World_NOT_FDA	-10.7	1	0	50
1777	ZINC000003873365		World_NOT_FDA	-10.7	0	1	48
1778	ZINC000003874585	Oxetacaine	World_NOT_FDA	-10.7	0	0	95
1779	ZINC000003982471		World_NOT_FDA	-10.7	0	2	56
1780	ZINC000004026419	Cdmt	World_NOT_FDA	-10.7	0	0	50
1781	ZINC000005497532	Methenolone	World_NOT_FDA	-10.7	0	0	57
1782	ZINC000006067779	Andros-S	World_NOT_FDA	-10.7	0	0	46
1783	ZINC000006117750	Desmethylazelastine	World_NOT_FDA	-10.7	1	0	62
1784	ZINC000011616657		World_NOT_FDA	-10.7	1	0	76
1785	ZINC000013449412	6-O-Desmethyldonepezil	World_NOT_FDA	-10.7	0	0	57
1786	ZINC000014879961		World_NOT_FDA	-10.7	0	2	136
1787	ZINC000031417978	KetoprofenGlucuronide	World_NOT_FDA	-10.7	1	0	74
1788	ZINC000033972992		World_NOT_FDA	-10.7	0	0	80
1789	ZINC000033972993		World_NOT_FDA	-10.7	2	0	92
1790	ZINC000067665085		World_NOT_FDA	-10.7	1	1	111
1791	ZINC000095619120	3-Trans-HydroxycyclohexylGlyburide	World_NOT_FDA	-10.7	1	0	97
1792	ZINC000256072841		World_NOT_FDA	-10.7	0	3	86
1793	ZINC000000538564	casodex	FDA	-10.7	0	0	51
1794	ZINC000000597013	donepezil	FDA	-10.7	0	0	53
1795	ZINC000000897408	casodex	FDA	-10.7	0	0	59
1796	ZINC000000899797	(r)-glabridin	Metab	-10.7	3	0	65
1797	ZINC000001485935	isavuconazole	FDA	-10.7	2	1	69
1798	ZINC000001532097	asana	Metab	-10.7	0	0	82
1799	ZINC000001548097	fanapt	FDA	-10.7	3	1	82
1800	ZINC000002019691	benzo[a]pyrene-7,8-diol	Metab	-10.7	1	0	40
1801	ZINC000002019692	benzo[a]pyrene-7,8-diol	Metab	-10.7	0	0	38
1802	ZINC000002019693	benzo[a]pyrene-7,8-diol	Metab	-10.7	0	0	37
1803	ZINC000002019694	benzo[a]pyrene-7,8-diol	Metab	-10.7	1	0	38
1804	ZINC000002539364	7-Ketocholesterol	Metab	-10.7	0	1	70
1805	ZINC000003813047	oxandrolone	FDA	-10.7	1	0	43
1806	ZINC000003817234	celsentri	FDA	-10.7	0	4	108
1807	ZINC000003914811	lagodeoxycholate	Metab	-10.7	3	1	65
1808	ZINC000004096634	17-oh-pregnenolone	Metab	-10.7	0	1	55
1809	ZINC000004097088	cholest-5-ene-3,7,27-triol	Metab	-10.7	1	0	97
1810	ZINC000004212945	dfba	FDA	-10.7	0	2	78
1811	ZINC000004213946	nebivolol	FDA	-10.7	0	0	61
1812	ZINC000004215044	boldenoneundecylenate	Metab	-10.7	0	0	69
1813	ZINC000004282168	tudcabil	Metab	-10.7	1	1	86
1814	ZINC000004474414	calderol	Metab, FDA	-10.7	0	0	78
1815	ZINC000004629876	daral	Metab, FDA	-10.7	0	0	70
1816	ZINC000004655035	e-tocopherol	Metab	-10.7	0	0	84
1817	ZINC000005167145	pregnenolonesulfate	Metab	-10.7	0	1	39
1818	ZINC000005167249	17-hydroxypregnenolonesulfate	Metab	-10.7	0	1	44
1819	ZINC000005706477	Grandiflorolicacid	Metab	-10.7	1	0	72
1820	ZINC000006036380	3beta-Hydroxy-5-cholestenoicacid	Metab	-10.7	0	1	69
1821	ZINC000006094187	sesamolin	Metab	-10.7	0	0	29
1822	ZINC000006745272	stivarga	FDA	-10.7	1	2	56
1823	ZINC000008143774	glycocholate	Metab	-10.7	0	3	85
1824	ZINC000011681534	nebivolol	FDA	-10.7	0	0	59
1825	ZINC000012493596	3-epi-deoxycholate	Metab	-10.7	1	0	71
1826	ZINC000012493900	7a,12a-dihydroxy-3-oxo-4-cholenoate	Metab	-10.7	0	1	56
1827	ZINC000012496793	1-a,24r,25-trihydroxyvitamind2	Metab	-10.7	1	0	92
1828	ZINC000014690464	sesamolinol	Metab	-10.7	0	0	28
1829	ZINC000014712188	Sorgolactone	Metab	-10.7	0	0	39
1830	ZINC000028876470	Schottenol	Metab	-10.7	1	1	83
1831	ZINC000033832133	ent-7-Oxo-8(14),15-pimaradien-19-oicacid	Metab	-10.7	1	0	48
1832	ZINC000033902528	3,7-dihydroxy-5-cholestenoate	Metab	-10.7	2	0	86
1833	ZINC000040164222	3alpha,7alpha-Dihydroxycoprostanicacid	Metab	-10.7	1	1	88
1834	ZINC000040164270	5b-Cholestane-3a,7a,12a,24,25-pentol	Metab	-10.7	0	1	81
1835	ZINC000056871168	3alpha,7alpha,26-Trihydroxy-5beta-cholestane	Metab	-10.7	2	0	87
1836	ZINC000067665085	SR49498	Metab	-10.7	1	1	98
1837	ZINC000095620638	1,2,3,4-Tetrahydro-1-phenyl-4-(1-phenylethyl)naphthalene	Metab	-10.7	0	0	57
1838	ZINC000100005073	indigocarmine	Metab	-10.7	0	0	47
1839	ZINC000118912393	testosterone	Metab, FDA	-10.7	0	0	51
1840	ZINC000139361227	ent-7-Oxo-8(14),15-pimaradien-19-oicacid	Metab	-10.7	1	0	46
1841	ZINC000239402955	3-O-Acetylepisamarcandin	Metab	-10.7	1	3	80
1842	ZINC000253497581	beta-Sitosterolacetate	Metab	-10.7	0	2	100
1843	ZINC000253497644	Glycocholicacid	Metab	-10.7	2	0	90
1844	ZINC000253590164	GanoderolA	Metab	-10.7	0	5	85
1845	ZINC000253597111	Sesamolin	Metab	-10.7	0	0	30
1846	ZINC000253597113	Sesamolin	Metab	-10.7	0	0	28
1847	ZINC000256427300	Clerosterol	Metab	-10.7	0	1	86
1848	ZINC000257376127	4-(4-Hydroxyphenyl)-2-butanoneO-[2-galloyl-6-cinnamoylglucoside]	Metab	-10.7	1	0	121
1849	ZINC000257376128	4-(4-Hydroxyphenyl)-2-butanoneO-[2-galloyl-6-cinnamoylglucoside]	Metab	-10.7	1	0	129
1850	ZINC000257398171	31-Norcyclolaudenone	Metab	-10.7	0	4	78
1851	ZINC000257398172	31-Norcyclolaudenone	Metab	-10.7	0	1	78
1852	ZINC000257416692	5alpha-Cholest-7-en-3-one	Metab	-10.7	0	1	56
1853	ZINC000257453611	GanoderenicacidD	Metab	-10.7	1	1	121
1854	ZINC000257463481	Sorgolactone	Metab	-10.7	0	0	38
1855	ZINC000257531047	GanoderalA	Metab	-10.7	0	1	78
1856	ZINC000257622340	beta-Elemonicacid	Metab	-10.7	0	1	102
1857	CID_125328	L-687,384	Agonists-Antagonists	-10.6	0	0	33
1858	CID_163331	Prasteroneenanthate	Agonists-Antagonists	-10.6	0	0	69
1859	LMST02020021	Dehydroepiandrosterone	Androgens, Steroids, Sterol_Lipids	-10.6	0	0	42
1860	LMST02020028	Methenolone	Androgens, Steroids, Sterol_Lipids	-10.6	0	0	55
1861	LMST02020064	16alpha-Hydroxydehydroepiandrosterone	Androgens, Steroids, Sterol_Lipids	-10.6	0	0	44
1862	LMST02020075	Testosteroneenanthate	Androgens, Steroids, Sterol_Lipids	-10.6	0	1	76
1863	LMST01010124	32-hydroxylanosterol	Chol, Sterols	-10.6	0	3	100
1864	LMST01010173	cholesterylbeta-D-glucoside	Chol, Sterols	-10.6	3	6	136
1865	LMST01010296	Penasterol	Chol, Sterols	-10.6	0	2	96
1866	LMST01010318	-	Chol, Sterols	-10.6	0	2	94
1867	LMST01010319	ThornasterolA	Chol, Sterols	-10.6	0	2	74
1868	LMST01010362	-	Chol, Sterols	-10.6	1	1	75
1869	LMST01030133	6-oxocampestanol	Erg, Sterols	-10.6	0	1	95
1870	LMST01030137	-	Erg, Sterols	-10.6	0	1	71
1871	LMST01030146	-	Erg, Sterols	-10.6	0	2	86
1872	LMST01031002	Ergosta-5,7,22E,24(28)-tetraenol	Erg, Sterols	-10.6	0	0	61
1873	LMST01031056	Sipalosterol	Erg, Sterols	-10.6	1	3	89
1874	LMST02030146	5beta-pregnane-3,20-dione	Steroids, Sterol_Lipids	-10.6	0	1	52
1875	LMST02030150	pregn-4-en-3-one	Steroids, Sterol_Lipids	-10.6	0	0	62
1876	LMST02030169	(20S)-20-hydroxypregn-4-en-3-one	Steroids, Sterol_Lipids	-10.6	0	0	61
1877	LMST02030170	5alpha-pregnane-3,20-dione	Steroids, Sterol_Lipids	-10.6	0	0	49
1878	LMST02030186	corticosterone	Steroids, Sterol_Lipids	-10.6	0	0	66
1879	LMST02030189	-	Steroids, Sterol_Lipids	-10.6	0	0	59
1880	LMST05010018	16alpha,17beta-Estriol17-(beta-D-glucuronide)	Steroids, Sterol_Lipids	-10.6	0	0	89
1881	LMST05010026	Chenodeoxycholicacid3-glucuronide	Steroids, Sterol_Lipids	-10.6	0	0	73
1882	LMST05050028	Cholesteryl-alpha-D-glucoside	Steroids, Sterol_Lipids	-10.6	0	0	72
1883	LMST01060039	Secogorgosterol	Sterol_Lipids	-10.6	0	0	93
1884	LMST01060040	KlyflaccisteroidF	Sterol_Lipids	-10.6	0	1	98
1885	LMST01160037	NicansteroidinB	Sterol_Lipids	-10.6	0	5	93
1886	LMST03020004	1alpha,21-dihydroxy-20-oxo-22,23,24,25,26,27-hexanorvitaminD3/1alpha,21-dihydroxy-20-oxo-22,23,24,25,26,27-hexanorcholecalciferol	Sterol_Lipids	-10.6	0	0	63
1887	LMST03020010	22-hydroxy-23,24,25,26,27-pentanorvitaminD3/22-hydroxy-23,24,25,26,27-pentanorcholecalciferol	Sterol_Lipids	-10.6	0	0	46
1888	LMST03020019	23-hydroxy-24,25,26,27-tetranorvitaminD3/23-hydroxy-24,25,26,27-tetranorcholecalciferol	Sterol_Lipids	-10.6	0	0	51
1889	LMST03020020	1alpha,23-dihydroxy-24,25,26,27-tetranorvitaminD3/1alpha,23-dihydroxy-24,25,26,27-tetranorcholecalciferol	Sterol_Lipids	-10.6	0	0	67
1890	LMST03020074	1alpha,25-dihydroxy-19-norvitaminD3/1alpha,25-dihydroxy-19-norcholecalciferol	Sterol_Lipids	-10.6	0	1	70
1891	LMST03020090	(23S)-26,26,26,27,27,27-hexafluoro-1alpha,23,25-trihydroxyvitaminD3/(23S)-26,26,26,27,27,27-hexafluoro-1alpha,23,25-trihydroxycholecalciferol	Sterol_Lipids	-10.6	0	4	112
1892	LMST03020120	(23S,25R)-25-hydroxyvitaminD326,23-peroxylactone/(23S,25R)-25-hydroxycholecalciferol26,23-peroxylactone	Sterol_Lipids	-10.6	0	2	95
1893	LMST03020133	4,4-difluorovitaminD3/4,4-difluorocholecalciferol	Sterol_Lipids	-10.6	0	1	84
1894	LMST03020157	1-oxoprevitaminD3/1-oxoprecholecalciferol	Sterol_Lipids	-10.6	0	0	76
1895	LMST03020190	(22E)-(25R)-1alpha,25,26-trihydroxy-22,23-didehydrovitaminD3/(22E)-(25R)-1alpha,25,26-trihydroxy-22,23-didehydrocholecalciferol	Sterol_Lipids	-10.6	0	0	75
1896	LMST03020247	(6R)-6,19-epidioxy-6,19-dihydrovitaminD3/(6R)-6,19-epidioxy-6,19-dihydrocholecalciferol	Sterol_Lipids	-10.6	0	0	67
1897	LMST03020254	22-ethyl-1alpha,22-dihydroxy-25,26,27-trinorvitaminD3/22-ethyl-1alpha,22-dihydroxy-25,26,27-trinorcholecalciferol	Sterol_Lipids	-10.6	0	0	87
1898	LMST03020258	1alpha,25-dihydroxy-3-epivitaminD3/1alpha,25-dihydroxy-3-epicholecalciferol	Sterol_Lipids	-10.6	0	0	95
1899	LMST03020263	1alpha,25-dihydroxy-24a-homo-22-thia-20-epivitaminD3/1alpha,25-dihydroxy-24a-homo-22-thia-20-epicholecalciferol	Sterol_Lipids	-10.6	0	0	102
1900	LMST03020264	(5E)-1alpha,25-dihydroxyvitaminD3/(5E)-1alpha,25-dihydroxycholecalciferol	Sterol_Lipids	-10.6	0	0	90
1901	LMST03020277	(6S)-6,19-epidioxy-1alpha-hydroxy-6,19-dihydrovitaminD3/(6S)-6,19-epidioxy-1alpha-hydroxy-6,19-dihydrocholecalciferol	Sterol_Lipids	-10.6	0	0	75
1902	LMST03020281	(6S)-6,19-epidioxy-25-hydroxy-6,19-dihydrovitaminD3/(6S)-6,19-epidioxy-25-hydroxy-6,19-dihydrocholecalciferol	Sterol_Lipids	-10.6	0	0	78
1903	LMST03020315	24,24-difluoro-1alpha,25-dihydroxy-24a-homovitaminD3/24,24-difluoro-1alpha,25-dihydroxy-24a-homocholecalciferol	Sterol_Lipids	-10.6	0	0	84
1904	LMST03020336	(6R)-6-methylvitaminD36,19-sulfurdioxideadduct/(6R)-6-methylcholecalciferol6,19-sulfurdioxideadduct	Sterol_Lipids	-10.6	0	0	71
1905	LMST03020339	(1R)-25-hydroxy-1-(hydroxymethyl)vitaminD3/(1R)-25-hydroxy-1-(hydroxymethyl)cholecalciferol	Sterol_Lipids	-10.6	0	2	76
1906	LMST03020359	2beta-methyl-20-epi-1beta,25-dihydroxyvitaminD3/2beta-methyl-20-epi-1beta,25-dihydroxycholecalciferol	Sterol_Lipids	-10.6	0	1	85
1907	LMST03020379	(20S)-1alpha,25-dihydroxy-20-methoxyvitaminD3/(20S)-1alpha,25-dihydroxy-20-methoxycholecalciferol	Sterol_Lipids	-10.6	0	0	77
1908	LMST03020385	(20S)-1alpha,20,25-trihydroxy-24a-homovitaminD3/(20S)-1alpha,20,25-trihydroxy-24a-homocholecalciferol	Sterol_Lipids	-10.6	0	0	91
1909	LMST03020391	1alpha,25-dihydroxy-26,27-dimethyl-20,21,22,22,23,23-hexadehydrovitaminD3/1alpha,25-dihydroxy-26,27-dimethyl-20,21,22,22,23,23-hexadehydrocholecalciferol	Sterol_Lipids	-10.6	0	0	89
1910	LMST03020425	1alpha,25-dihydroxy-24a,24b,24c-trihomo-22-thia-20-epivitaminD3/1alpha,25-dihydroxy-24a,24b,24c-trihomo-22-thia-20-epicholecalciferol	Sterol_Lipids	-10.6	0	0	116
1911	LMST03020428	1alpha,25-dihydroxy-24a,24b,24c-trihomo-22-oxavitaminD3/1alpha,25-dihydroxy-24a,24b,24c-trihomo-22-oxacholecalciferol	Sterol_Lipids	-10.6	0	0	104
1912	LMST03020442	toxisterol3B3/(10R)-10-ethoxy-10,19-dihydrovitaminD3/(10R)-10-ethoxy-10,19-dihydrocholecalciferol	Sterol_Lipids	-10.6	0	0	85
1913	LMST03020458	(22E)-1alpha,25-dihydroxy-26,27-dimethyl-22,23-didehydro-24a-homovitaminD3/(22E)-1alpha,25-dihydroxy-26,27-dimethyl-22,23-didehydro-24a-homocholecalciferol	Sterol_Lipids	-10.6	0	1	117
1914	LMST03020485	(22S)-1alpha,25-dihydroxy-22-methoxy-26,27-dimethyl-23,24-tetradehydro-24a-homo-20-epivitaminD3/(22S)-1alpha,25-dihydroxy-22-methoxy-26,27-dimethyl-23,24-tetradehydro-24a-homo-20-epicholecalciferol	Sterol_Lipids	-10.6	0	1	110
1915	LMST03020487	(22R)-1alpha,22,25-trihydroxy-26,27-dimethyl-23,23,24,24-tetradehydro-24a,24b-dihomovitaminD3/(22R)-1alpha,22,25-trihydroxy-26,27-dimethyl-23,23,24,24-tetradehydro-24a,24b-dihomocholecalciferol	Sterol_Lipids	-10.6	0	1	115
1916	LMST03020488	(22S)-1alpha,22,25-trihydroxy-26,27-dimethyl-23,23,24,24-tetradehydro-24a,24b-dihomovitaminD3/(22S)-1alpha,22,25-trihydroxy-26,27-dimethyl-23,23,24,24-tetradehydro-24a,24b-dihomocholecalciferol	Sterol_Lipids	-10.6	0	0	120
1917	LMST03020492	(10E)-19-(3-carboxylpropyl)vitaminD3/(10E)-19-(3-carboxylpropyl)cholecalciferol	Sterol_Lipids	-10.6	0	2	112
1918	LMST03020580	25-hydroxy-1beta-hydroxymethyl-26,27-dimethyl-16,17-didehydro-3-epivitaminD3/25-hydroxy-1beta-hydroxymethyl-26,27-dimethyl-16,17-didehydro-3-epicholecalciferol	Sterol_Lipids	-10.6	0	0	87
1919	LMST03020647	3-epi-vitaminD3	Sterol_Lipids	-10.6	0	1	79
1920	LMST03020650	VitaminD3sulfoconjugate	Sterol_Lipids	-10.6	0	0	61
1921	LMST03020660	1alpha-Hydroxypregnacalciferol	Sterol_Lipids	-10.6	0	1	73
1922	LMST04010037	-	Sterol_Lipids	-10.6	0	0	76
1923	LMST04010097	-	Sterol_Lipids	-10.6	0	0	82
1924	LMST04010099	-	Sterol_Lipids	-10.6	0	0	84
1925	LMST04010133	-	Sterol_Lipids	-10.6	0	0	64
1926	LMST04010157	-	Sterol_Lipids	-10.6	0	0	74
1927	LMST04010162	-	Sterol_Lipids	-10.6	0	0	69
1928	LMST04010169	-	Sterol_Lipids	-10.6	0	2	69
1929	LMST04010212	-	Sterol_Lipids	-10.6	0	0	71
1930	LMST04010224	-	Sterol_Lipids	-10.6	0	1	74
1931	LMST04010271	-	Sterol_Lipids	-10.6	0	2	86
1932	LMST04010299	-	Sterol_Lipids	-10.6	0	1	62
1933	LMST04010332	-	Sterol_Lipids	-10.6	0	0	66
1934	LMST04010348	-	Sterol_Lipids	-10.6	0	2	72
1935	LMST04010374	-	Sterol_Lipids	-10.6	0	0	57
1936	LMST04010381	-	Sterol_Lipids	-10.6	0	1	71
1937	LMST04010383	-	Sterol_Lipids	-10.6	0	0	81
1938	LMST04010389	-	Sterol_Lipids	-10.6	0	1	72
1939	LMST04010443	Alloavicholicacid	Sterol_Lipids	-10.6	0	0	74
1940	LMST04030083	-	Sterol_Lipids	-10.6	0	1	99
1941	LMST04030114	-	Sterol_Lipids	-10.6	0	1	79
1942	LMST04030115	-	Sterol_Lipids	-10.6	0	2	83
1943	LMST04030143	-	Sterol_Lipids	-10.6	0	0	76
1944	LMST04030150	(25R)-3alpha,7alpha,12alpha-trihydroxy-5beta-cholestan-26-oicacid	Sterol_Lipids	-10.6	0	1	80
1945	LMST04030165	7alpha,25-dihydroxycholesterol	Sterol_Lipids	-10.6	0	1	70
1946	LMST05020035	HalistanolsulfonicacidG	Sterol_Lipids	-10.6	0	1	93
1947	LMST01040147	-	Sterols	-10.6	0	1	86
1948	LMST01040152	ajugalactone	Sterols	-10.6	0	0	83
1949	LMST01040163	(25E)-26-methylstrongylosterol	Sterols	-10.6	0	1	84
1950	LMST01040179	Saoussazine	Sterols	-10.6	0	2	89
1951	LMST01040246	5beta-poriferastane	Sterols	-10.6	0	0	82
1952	LMST01060024	-	Sterols	-10.6	0	2	111
1953	LMST01080025	Sisalagenin	Sterols	-10.6	0	1	75
1954	LMST01080031	Nogiragenin	Sterols	-10.6	0	2	88
1955	LMST01080046	Hispigenin	Sterols	-10.6	0	3	86
1956	LMST01120007	antiogenin	Sterols	-10.6	0	2	57
1957	LMST01130069	Pseudobufarenogin	Sterols	-10.6	2	1	70
1958	LMST01130070	Bufarenogin	Sterols	-10.6	1	2	54
1959	LMST01140003	7-oxotyphasterol	Sterols	-10.6	2	1	93
1960	LMST01150001	Demissidine	Sterols	-10.6	0	4	73
1961	LMST01160019	WithanolideA	Sterols	-10.6	2	1	84
1962	ZINC000000024890	TazarotenicAcid	World_NOT_FDA	-10.6	3	0	52
1963	ZINC000001481831	Sitaxentan	World_NOT_FDA	-10.6	0	0	47
1964	ZINC000001490477	Tolvaptan	World_NOT_FDA	-10.6	0	5	73
1965	ZINC000001540228	Rimonabant	World_NOT_FDA	-10.6	0	3	85
1966	ZINC000002568171	Alpha-Hydroxyalprazolam	World_NOT_FDA	-10.6	1	2	52
1967	ZINC000003875998		World_NOT_FDA	-10.6	0	0	43
1968	ZINC000003881421	Boldione	World_NOT_FDA	-10.6	0	1	41
1969	ZINC000003938750	Canrenoate	World_NOT_FDA	-10.6	0	1	61
1970	ZINC000004096458	Dheas	World_NOT_FDA	-10.6	0	0	44
1971	ZINC000004216820	Medrogestone	World_NOT_FDA	-10.6	0	1	65
1972	ZINC000012484919	Calcifediol	World_NOT_FDA	-10.6	0	0	63
1973	ZINC000012484926	Calcifediol	World_NOT_FDA	-10.6	0	0	68
1974	ZINC000013449462	5-O-Desmethyldonepezil	World_NOT_FDA	-10.6	0	0	49
1975	ZINC000013449465	5-O-Desmethyldonepezil	World_NOT_FDA	-10.6	0	0	56
1976	ZINC000013515301	17-Beta-EstradiolGlucuronide	World_NOT_FDA	-10.6	2	1	75
1977	ZINC000022034381	Lidoflazine	World_NOT_FDA	-10.6	2	1	116
1978	ZINC000028870000		World_NOT_FDA	-10.6	1	0	64
1979	ZINC000043100810	Delamanid	World_NOT_FDA	-10.6	0	1	83
1980	ZINC000065742834	5-Hydroxybuspirone	World_NOT_FDA	-10.6	4	0	75
1981	ZINC000077269418	AbirateroneSulfate	World_NOT_FDA	-10.6	0	3	63
1982	ZINC000077269421	N-OxideAbirateroneSulfate	World_NOT_FDA	-10.6	1	2	83
1983	ZINC000089224316		World_NOT_FDA	-10.6	0	0	65
1984	ZINC000253535680		World_NOT_FDA	-10.6	0	0	56
1985	ZINC000000538453	tiazuril	Metab	-10.6	0	0	43
1986	ZINC000000601229	azelastine	FDA	-10.6	1	0	69
1987	ZINC000000643153	nizoral	FDA	-10.6	2	2	95
1988	ZINC000000899902	psoralidin	Metab	-10.6	0	0	53
1989	ZINC000001489478	sitagliptin	FDA	-10.6	0	0	54
1990	ZINC000001552174	pletal	FDA	-10.6	2	0	65
1991	ZINC000001691515	natolone	Metab	-10.6	1	1	47
1992	ZINC000001916008	d-tocotrienol	Metab	-10.6	0	0	74
1993	ZINC000002522669	fentanyl	FDA	-10.6	0	0	43
1994	ZINC000002545077	Dihydrocholesterol	Metab	-10.6	0	1	61
1995	ZINC000002585906	1-phenyl-4-(1-phenylethyl)tetralin	Metab	-10.6	0	0	58
1996	ZINC000003255767		Metab	-10.6	0	0	74
1997	ZINC000003791931	d-tocotrienol	Metab	-10.6	0	0	73
1998	ZINC000003814360	dht	Metab	-10.6	0	0	49
1999	ZINC000003814418	(beta)-valienamine	Metab	-10.6	0	0	50
[truncated: 1,006 more rows]
