# Supplementary material for: Investigation of the Entry Pathway and Molecular Nature of σ1 Receptor Ligands
Source: Int J Mol Sci. 2023 Mar 28;24(7):6367. doi: 10.3390/ijms24076367 (PMC10094450; doi:10.3390/ijms24076367)
Supplement: Supplementary file 1 [file ijms-24-06367-s001.zip › Supplementary-Table-S3_VS-5HK1-6DK1.xlsx]

## Sheet: 5HK1-6DK1
	A) 5HK1 and 6DK1 ligand (1271)
				Ecalc
	Database ID	Compound name	Category	5HK1	6DK1
1	ZINC000001727527	Norsanguinarine	Metab	-13	-11.5
2	ZINC000001554274	Rilpivirine	FDA	-12.8	-11
3	LMST01031015	ergosta-5,7,22,24(28)-tetraen-3beta-ol	Erg, Sterols	-12.7	-12.1
4	LMST01160007	Minabeolide-6	Sterols	-12.7	-12.1
5	ZINC000003881345	EstradiolBenzoate	World_NOT_FDA	-12.6	-11.9
6	ZINC000000538312	Risperidone	FDA	-12.6	-11.8
7	ZINC000011616882	Axitinib(cis)	FDA	-12.6	-11.2
8	ZINC000014880001	Dutasteride	World_NOT_FDA	-12.5	-12.7
9	ZINC000043195321	Capmatinib	World_NOT_FDA	-12.5	-10.8
10	LMST01130063	BufogargarizinD	Sterols	-12.4	-13
11	LMST01160002	Minabeolide-1	Sterols	-12.4	-12.4
12	LMST01160005	Minabeolide-4	Sterols	-12.4	-12.2
13	ZINC000008214421	Lufenuron	World_NOT_FDA	-12.4	-11.7
14	LMST01160004	Minabeolide-3	Sterols	-12.3	-12.6
15	ZINC000006716957	Nilotinib	FDA	-12.3	-12.4
16	ZINC000004027981	Conferone	Metab	-12.3	-11.9
17	LMST01160023	ExodeconolideF	Sterols	-12.3	-11.7
18	ZINC000003984116	Quinacridone	Metab	-12.3	-11.7
19	ZINC000017653974	Lufenuron	World_NOT_FDA	-12.3	-11.5
20	ZINC000003821234	4-[3-(1,4-diazepan-1-ylcarbonyl)-4-fluorobenzyl]phthalazin-1(2H)-one	World_NOT_FDA	-12.3	-11.4
21	ZINC000013444037	Tasosartan	World_NOT_FDA	-12.3	-10.3
22	LMST01160000	Withanolideskeleton	Sterols	-12.2	-12.4
23	ZINC000001481956	Paliperidone	FDA	-12.2	-11.7
24	ZINC000004214700	Paliperidone	FDA	-12.2	-11.7
25	LMST01110011	23,24-dihydro-5alpha-calystanol	Sterols	-12.2	-11.5
26	ZINC000003881613	Nandrolonephenpropionate	World_NOT_FDA	-12.1	-12.1
27	ZINC000003876078	Estradiol	World_NOT_FDA	-12.1	-11.9
28	LMST01030093	Ergosterol	Erg, Sterols	-12.1	-11.5
29	ZINC000014727602	IsoangustoneA	Metab	-12.1	-11
30	ZINC000261499150	5-Dehydroavenasterol	Metab	-12	-12.2
31	ZINC000001542113	Vilazadone	FDA	-12	-11.7
32	ZINC000253597112	Sesamolin	Metab	-12	-11.3
33	ZINC000005752185	Clobetasone	World_NOT_FDA	-12	-10.4
34	LMST01031046	Peridinosterol	Erg, Sterols	-11.9	-11.6
35	ZINC000001844627	Talniflumate	World_NOT_FDA	-11.9	-11.6
36	ZINC000003873781	Metergoline	World_NOT_FDA	-11.9	-11.4
37	ZINC000000006990	SarizotanHydrochloride	World_NOT_FDA	-11.9	-11.4
38	LMST01031114	4Î±-methyl-ergosta-6,8(14)-dien-3Î²-ol	Erg, Sterols	-11.9	-11.3
39	ZINC000058581064	Dolutegravir	FDA	-11.9	-11.2
40	ZINC000000001567	Indoramin	World_NOT_FDA	-11.9	-10.8
41	ZINC000019796080	inapsine	FDA	-11.9	-10.5
42	ZINC000008219876	5-Cholestene	Metab	-11.9	-10.4
43	CID_9829526	Siramesine	Agonists-Antagonists	-11.8	-12.8
44	LMST01030145	23,24-Dimethylcholest-22-en-3beta-ol	Erg, Sterols	-11.8	-11.9
45	LMST01040166	24-ethylcholesta-5,7,23Z-trien-3beta-ol	Sterols	-11.8	-11.2
46	LMST01030142	4α,23,24-Trimethyl-5α-cholest-17(20)-en-3β-ol	Erg, Sterols	-11.8	-10.7
47	ZINC000002019691	Benzo[a]pyrene-7,8-Diol	Metab	-11.8	-10.7
48	ZINC000002019692	Benzo[a]pyrene-7,8-Diol	Metab	-11.8	-10.7
49	ZINC000002019693	Benzo[a]pyrene-7,8-Diol	Metab	-11.8	-10.7
50	ZINC000002019694	Benzo[a]pyrene-7,8-Diol	Metab	-11.8	-10.7
51	ZINC000009232411	Benperidol	World_NOT_FDA	-11.8	-10.5
52	LMST03030003	1,25-Dihydroxylumisterol(3)	Sterol_Lipids	-11.7	-12.5
53	ZINC000261499149	5-Dehydroavenasterol	Metab	-11.7	-12.3
54	LMST01031027	22-dihydroergosterol	Erg, Sterols	-11.7	-12.1
55	ZINC000004097812	Avenasterol	Metab	-11.7	-12.1
56	LMST01031158	CraterolA	Erg, Sterols	-11.7	-12
57	LMST01031058	Sarcosterol	Erg, Sterols	-11.7	-12
58	ZINC000102249909	Doxercalciferol	World_NOT_FDA	-11.7	-11.9
59	ZINC000000601275	Talniflumate	World_NOT_FDA	-11.7	-11.9
60	LMST01040241	(5alpha,24(28)Z)-Stigmast-24(28)-en-3-one	Sterols	-11.7	-11.8
61	LMST01040262	poriferastane	Sterols	-11.7	-11.6
62	LMST01010355	4alpha-OH-7-DHC	Chol, Sterols	-11.7	-11.5
63	ZINC000001886965	Mahanimbine	Metab	-11.7	-11.5
64	LMST01040244	5alpha-poriferastane	Sterols	-11.7	-11.4
65	ZINC000000898237	Rutaecarpine	World_NOT_FDA	-11.7	-11.1
66	ZINC000000538415	Tamibarotene	World_NOT_FDA	-11.7	-11.1
67	ZINC000003820029	linagliptin	FDA	-11.7	-10.9
68	ZINC000001548097	Fanapt	FDA	-11.7	-10.7
69	ZINC000001552174	cilostazol	FDA	-11.7	-10.6
70	LMST01080100	AsparacemosoneD	Sterols	-11.6	-12.3
71	ZINC000003809191	Abiraterone	World_NOT_FDA	-11.6	-12.2
72	LMST01110001	Calysterol	Sterols	-11.6	-12.2
73	ZINC000004097814	Fucosterin	Metab	-11.6	-12
74	ZINC000002101853	Conferone	Metab	-11.6	-11.8
75	ZINC000002146627	Conferone	Metab	-11.6	-11.8
76	ZINC000002187519	Conferone	Metab	-11.6	-11.8
77	ZINC000033830297	Conferone	Metab	-11.6	-11.8
78	LMST03020135	(5Z,7E)-(3S)-4,4-difluoro-9,10-seco-5,7,10(19)-cholestatrien-3-ol	Sterol_Lipids	-11.6	-11.7
79	LMST01030102	Ergostanol	Erg, Sterols	-11.6	-11.7
80	LMST03010008	26,26,26,27,27,27-hexafluoro-25-hydroxyvitaminD2	Sterol_Lipids	-11.6	-11.6
81	ZINC000001634347	(r)-Mahanine	Metab	-11.6	-11.5
82	ZINC000000968444	Mahanimbine	Metab	-11.6	-11.3
83	ZINC000000537877	Ketanserin	World_NOT_FDA	-11.6	-11.2
84	ZINC000004081771	Testolactone	World_NOT_FDA	-11.6	-11
85	LMST01040120	7-dehydrositosterol	Sterols	-11.6	-10.9
86	LMST01160034	ParaminabeolideA	Sterols	-11.6	-10.9
87	ZINC000052716421	flibanserin	FDA	-11.6	-10.8
88	ZINC000011681534	Nebivolol	FDA	-11.6	-10.7
89	ZINC000006094187	Sesamolin	Metab	-11.6	-10.7
90	ZINC000253597111	Sesamolin	Metab	-11.6	-10.7
91	ZINC000253597113	Sesamolin	Metab	-11.6	-10.7
92	ZINC000014690464	Sesamolinol	Metab	-11.6	-10.7
93	LMST01130001	Bufalin	Sterols	-11.5	-12.3
94	LMST01031022	5-campestenone	Erg, Sterols	-11.5	-12.1
95	LMST01150016	20-epi-Verazine	Sterols	-11.5	-12
96	ZINC000004641374	Doxercalciferol	FDA	-11.5	-12
97	LMST01010058	3,5-cholestadien-7-one	Chol, Sterols	-11.5	-11.9
98	ZINC000004028456	Conferone	Metab	-11.5	-11.9
99	LMST01030123	5alpha-campestan-3-one	Erg, Sterols	-11.5	-11.7
100	ZINC000003860715	Derrin	Metab	-11.5	-11.6
101	LMST01040157	Fucostanol	Sterols	-11.5	-11.6
102	LMST01010313	19-norcholestenone	Chol, Sterols	-11.5	-11.5
103	LMST01031117	22S-hydroxy-5alpha-campestan-3-one	Erg, Sterols	-11.5	-11.5
104	LMST03020331	6-methylvitaminD3/6-methylcholecalciferol	Sterol_Lipids	-11.5	-11.5
105	LMST01030147	23S,24R-Dimethylcholestan-3beta-ol	Erg, Sterols	-11.5	-11.4
106	LMST01150007	Solanidine	Sterols	-11.5	-11.4
107	ZINC000006206699	(+)-Mahanimbicine	Metab	-11.5	-11.3
108	LMST01110010	Petrostanol	Sterols	-11.5	-11.3
109	LMST01031045	Dinosterone	Erg, Sterols	-11.5	-11.2
110	ZINC000001615142	Girinimbine	Metab	-11.5	-11.2
111	LMST01110009	Hebesterol	Sterols	-11.5	-11.2
112	LMST02020084	testolactone	Steroids, DeltaL, Androgens, Sterol_Lipids	-11.5	-11.1
113	LMST02020061	3-oxo-13,17-secoandrost-4-ene-17,13alpha-lactone	Steroids, Androgens, Sterol_Lipids	-11.5	-11
114	ZINC000001532099	Asana	Metab	-11.5	-10.9
115	ZINC000004655035	E-Tocopherol	Metab	-11.5	-10.7
116	ZINC000004213946	Nebivolol	FDA	-11.5	-10.7
117	ZINC000005844792	Nebivolol	FDA	-11.5	-10.5
118	LMST01031018	pregna-4,9(11)-diene-3,20-dione	Erg, Sterols	-11.5	-10.5
119	ZINC000013449409	6-O-Desmethyldonepezil	Metab, World_NOT_FDA	-11.5	-10.4
120	LMST02030177	megestrol	Steroids, Estrogens, Sterol_Lipids	-11.5	-10.3
121	ZINC000004097376	stanozolol	Metab, World_NOT_FDA	-11.4	-12.5
122	LMST01130000	Bufanolideskeleton	Sterols	-11.4	-11.9
123	ZINC000040430143	Olaparib	FDA	-11.4	-11.9
124	LMST03010039	(7E,22E)-(3S,6S)-6-hydroperoxy-9,10-seco-4,7,10(19),22-ergostatetraen-3-ol	Sterol_Lipids	-11.4	-11.8
125	LMST01030138	22,23-Methylene-24-methyl-cholest-5-en-3beta-ol	Erg, Sterols	-11.4	-11.8
126	LMST01040165	Axinyssasterol	Sterols	-11.4	-11.8
127	LMST01110005	(24S)-isocalysterol	Sterols	-11.4	-11.7
128	LMST01030001	Campestaneskeleton	Erg, Sterols	-11.4	-11.7
129	LMST01030000	Ergostaneskeleton	Erg, Sterols	-11.4	-11.7
130	ZINC000000899909	Sojagol	Metab	-11.4	-11.7
131	LMST01030144	23-methyl,24-methylene-cholest-5-en-3beta-ol	Erg, Sterols	-11.4	-11.6
132	ZINC000005845767	(r)-Mahanine	Metab	-11.4	-11.5
133	LMST01040255	fucosterol	Sterols	-11.4	-11.5
134	ZINC000006206700	(+)-Mahanimbicine	Metab	-11.4	-11.4
135	LMST01040268	CraterolB	Sterols	-11.4	-11.4
136	LMST01040168	(3beta,24S,24'S)-fucosterolepoxide	Sterols	-11.4	-11.3
137	ZINC000001482077	Gliquidone	World_NOT_FDA	-11.4	-11.3
138	LMST03010016	tachysterol2	Sterol_Lipids	-11.4	-11.3
139	LMST01100011	cycloeucalenol	Sterols	-11.4	-11.2
140	LMST02030163	16,17-didehydroprogesterone	Steroids, DeltaL, Estrogens, Sterol_Lipids	-11.4	-11.1
141	LMST01050018	24-isopropenyl-22E-dehydrocholesterol	Sterols	-11.4	-10.8
142	LMST04010455	3,12-diketo-4,6-petromyzonene-24-sulfate	Sterol_Lipids	-11.4	-10.8
143	LMST01040276	4alpha,14alpha,23S-trimethyl-sitosterol	Sterols	-11.4	-10.8
144	ZINC000057509131	N-[4-(4-Indan-2-yl-piperazine-1-sulfonyl)-phenyl]-acetamide	Metab	-11.4	-10.8
145	ZINC000000899892	Phaseolin	Metab	-11.4	-10.8
146	ZINC000009330879	Rebamipide	World_NOT_FDA	-11.4	-10.8
147	ZINC000013449412	6-O-Desmethyldonepezil	Metab, World_NOT_FDA	-11.4	-10.7
148	LMST02020119	PenicildioneA	Steroids, Androgens, Sterol_Lipids	-11.4	-10.7
149	ZINC000100771793	(-)-FarnesiferolC	Metab	-11.4	-10.6
150	ZINC000100771795	(-)-FarnesiferolC	Metab	-11.4	-10.6
151	LMST02030150	pregn-4-en-3-one	Steroids, Estrogens, Sterol_Lipids	-11.4	-10.6
152	ZINC000113149554	Netarsudil	World_NOT_FDA	-11.4	-10.5
153	ZINC000094566092	Doxazosin	FDA	-11.4	-10.4
154	ZINC000000968277	Troglitazone	World_NOT_FDA	-11.4	-10.4
155	LMST02030168	11beta-hydroxyprogesterone	Steroids, Estrogens, Sterol_Lipids	-11.4	-10.3
156	LMST02030147	Delta(1)-progesterone	Steroids, DeltaL, Estrogens, Sterol_Lipids	-11.4	-10.2
157	LMST01110012	23,24-dihydro-calysterol	Sterols	-11.3	-12.5
158	LMST01130026	Gamabufotalin	Sterols	-11.3	-12.2
159	LMST01130020	19-oxo-bufalin	Sterols	-11.3	-12.1
160	LMST03010009	26,26,26,27,27,27-hexafluoro-25-hydroxyvitaminD2	Sterol_Lipids	-11.3	-12
161	LMST01010245	Cholesterylacetate	Chol, Sterols	-11.3	-12
162	ZINC000004084618	Ergosterol	Metab, World_NOT_FDA	-11.3	-12
163	LMST01010059	4,6-cholestadienone	Chol, Sterols	-11.3	-11.9
164	LMST02020074	Testosteronecypionate	Steroids, Androgens, Sterol_Lipids	-11.3	-11.9
165	LMST01100001	24-methylene-cycloartanol	Sterols	-11.3	-11.8
166	LMST01030116	24-methylene-cholestan-3beta-ol	Erg, Sterols	-11.3	-11.6
167	ZINC000001634344	Isomahanine	Metab	-11.3	-11.6
168	LMST01010356	24S-OH-7-DHC	Chol, Sterols	-11.3	-11.5
169	LMST01040245	5alpha-stigmastane	Sterols	-11.3	-11.5
170	LMST01040264	stigmastane	Sterols	-11.3	-11.5
171	ZINC000253616932	11-deoxycorticosteronepivalate	World_NOT_FDA	-11.3	-11.4
172	LMST01031051	4alpha-demethyldinosterol	Erg, Sterols	-11.3	-11.4
173	LMST03020201	(5E,10E)-19-fluorovitaminD3/(5E,10E)-19-fluorocholecalciferol	Sterol_Lipids	-11.3	-11.3
174	LMST03020139	(5Z)-4,4-difluoro-1alpha--hydroxyvitaminD3/(5Z)-4,4-difluoro-1alpha--hydroxycholecalciferol	Sterol_Lipids	-11.3	-11.3
175	LMST01040172	24-allenyl-cholesterol	Sterols	-11.3	-11.3
176	LMST01040135	stigmast-25-en-3beta-ol	Sterols	-11.3	-11.2
177	ZINC000006050190	(-)-Phaseollin	Metab	-11.3	-11.2
178	LMST02030242	ClathroidA	Steroids, Estrogens, Sterol_Lipids	-11.3	-11.2
179	LMST01090000	Furopirostaneskeleton	Sterols	-11.3	-11.2
180	LMST01160001	15beta-HydroxynicandrinB	Sterols	-11.3	-11.1
181	LMST03050002	ProvitaminD6	Sterol_Lipids	-11.3	-11
182	LMST03010036	(6R)-6,19-epidioxy-6,19-dihydrovitaminD2/(6R)-6,19-epidioxy-6,19-dihydroergocalciferol	Sterol_Lipids	-11.3	-10.9
183	ZINC000013449465	5-O-Desmethyldonepezil	Metab, World_NOT_FDA	-11.3	-10.9
184	ZINC000003927200	Yaz	FDA	-11.3	-10.9
185	ZINC000000538550	Ziprasidone	FDA	-11.3	-10.8
186	ZINC000000968278	Troglitazone	World_NOT_FDA	-11.3	-10.7
187	ZINC000006050191	(-)-Phaseollin	Metab	-11.3	-10.6
188	ZINC000034806477	Xtandi	FDA	-11.3	-10.6
189	ZINC000229763735	(+)-Zeylenol	Metab	-11.3	-10.5
190	ZINC000014767731	E-Tocopherol	Metab	-11.3	-10.5
191	ZINC000004097967	Kamassine	Metab	-11.3	-10.4
192	ZINC000000538483	Trazodone	FDA	-11.3	-10.4
193	ZINC000012504271	Atovaquone	World_NOT_FDA	-11.3	-10.3
194	LMST03020224	isotachysterol3	Sterol_Lipids	-11.3	-10.3
195	LMST05010017	16alpha,17beta-Estriol3-(beta-D-glucuronide)	Steroids, Sterol_Lipids	-11.3	-10.2
196	ZINC000035801098	Indacaterol	FDA	-11.3	-10.2
197	LMST01010257	5α,9α-epidioxy-cholesta-6,8(14)-dien-3β-ol	Chol, Sterols	-11.2	-12.5
198	LMST03020390	1alpha-hydroxy-22-(3-methylphenyl)-23,24,25,26,27-pentanorvitaminD3/1alpha-hydroxy-22-(3-methylphenyl)-23,24,25,26,27-pentanorcholecalciferol	Sterol_Lipids	-11.2	-12.4
199	LMST01010305	(24Z)-24,26-dimethyldesmosterol	Chol, Sterols	-11.2	-12.2
200	LMST01030122	campest-4-en-3-one	Erg, Sterols	-11.2	-12.1
201	LMST04030220	(25S)-dafachronicacid	Sterol_Lipids	-11.2	-11.9
202	LMST01031105	Chabrosterol	Erg, Sterols	-11.2	-11.9
203	LMST01030115	Episterol	Erg, Sterols	-11.2	-11.9
204	LMST01110015	(25S)-24S,26-cyclo-5alpha-cholestan-3beta-ol	Sterols	-11.2	-11.8
205	LMST01060010	(22R,23R)-methylenecholesterol	Sterols	-11.2	-11.8
206	ZINC000003875383	Cholesterol	Metab	-11.2	-11.8
207	LMST01030119	campest-7-en-3beta-ol	Erg, Sterols	-11.2	-11.7
208	LMST03040004	1-HydroxyvitaminD5	Sterol_Lipids	-11.2	-11.7
209	LMST01080032	Isorhodeasapogenin	Sterols	-11.2	-11.7
210	LMST01010400	Micaceol	Chol, Sterols	-11.2	-11.7
211	LMST01010316	Patinosterol	Chol, Sterols	-11.2	-11.7
212	LMST01031023	Dehydroergosterol	Erg, Sterols	-11.2	-11.6
213	LMST01030095	Fecosterol	Erg, Sterols	-11.2	-11.6
214	LMST01030112	24-methylene-25-methyl-cholest-7-en-3beta-ol	Erg, Sterols	-11.2	-11.5
215	LMST01040125	poriferast-7-en-3beta-ol	Sterols	-11.2	-11.5
216	LMST01010301	22,23-epoxycampesterol	Chol, Sterols	-11.2	-11.5
217	LMST01031120	3-epi-6-deoxocathasterone	Erg, Sterols	-11.2	-11.5
218	LMST03020310	1alpha-hydroxy-22-(3-hydroxyphenyl)-23,24,25,26,27-pentanorvitaminD3/1alpha-hydroxy-22-(3-hydroxyphenyl)-23,24,25,26,27-pentanorcholecalciferol	Sterol_Lipids	-11.2	-11.4
219	LMST03010067	7-Dehydrocholesterol-3-sulfateester	Sterol_Lipids	-11.2	-11.4
220	LMST01030103	Campestanol	Erg, Sterols	-11.2	-11.4
221	ZINC000004098720	HispaglabridinA	Metab	-11.2	-11.4
222	LMST01050013	24-Isopropyl-22E-dehydrocholesterol	Sterols	-11.2	-11.3
223	LMST01031036	25(26)-dehydroaplysterol	Erg, Sterols	-11.2	-11.3
224	LMST01010346	Marthasterone	Chol, Sterols	-11.2	-11.3
225	ZINC000004098742	Phaseolinisoflavan	Metab	-11.2	-11.3
226	ZINC000004212953	Dihydrotachysterol	World_NOT_FDA	-11.2	-11.2
227	ZINC000000901095	Glyceollin	Metab	-11.2	-11.2
228	ZINC000003816514	Rolapitant	FDA	-11.2	-11.2
229	LMST01060005	23-Methylcholesta-5,22E-dien-3beta-ol	Sterols	-11.2	-11.1
230	LMST01010304	(24E)-24,26-dimethyldesmosterol	Chol, Sterols	-11.2	-11.1
231	LMST03020307	dihydrotachysterol3/(5E)-(10S)-10,19-dihydrovitaminD3/(5E)-(10S)-10,19-dihydrocholecalciferol	Sterol_Lipids	-11.2	-11.1
232	LMST01040257	halosterolB	Sterols	-11.2	-11.1
233	LMST01010351	4,6-cholestadienol	Chol, Sterols	-11.2	-11
234	ZINC000049952219	5alpha-Cholestane	Metab	-11.2	-10.9
235	ZINC000000537804	Glisoxepide	World_NOT_FDA	-11.2	-10.9
236	ZINC000000968279	Troglitazone	World_NOT_FDA	-11.2	-10.9
237	ZINC000003791929	Gamma-Tocotrienol	Metab	-11.2	-10.8
238	ZINC000000602632	Intelence	FDA	-11.2	-10.8
239	LMST01030137	27-Nor-4alpha-methyl-5alpha-ergosta-8(14),22-dien-3beta-ol	Erg, Sterols	-11.2	-10.6
240	ZINC000003881421	Boldione	World_NOT_FDA	-11.2	-10.6
241	ZINC000001489478	Sitagliptin	FDA	-11.2	-10.6
242	LMST02020007	Androstenedione	Androgens, Steroids, Sterol_Lipids	-11.2	-10.5
243	ZINC000004216332	Esiclene	World_NOT_FDA	-11.2	-10.5
244	ZINC000001537184	Miltirone	Metab	-11.2	-10.5
245	LMST02020065	16alpha-hydroxyandrost-4-ene-3,17-dione	Androgens, Steroids, Sterol_Lipids	-11.2	-10.4
246	LMST02020066	11beta-Hydroxyandrostenedione	Androgens, Steroids, Sterol_Lipids	-11.2	-10.4
247	ZINC000019632822	Fipexide	World_NOT_FDA	-11.2	-10.4
248	ZINC000095618767	FlurbiprofenGlucuronide	World_NOT_FDA	-11.2	-10.4
249	ZINC000000643203	OchratoxinB	Metab	-11.2	-10.4
250	ZINC000005260598	OchratoxinB	Metab	-11.2	-10.4
251	ZINC000005260601	OchratoxinB	Metab	-11.2	-10.4
252	ZINC000005260602	OchratoxinB	Metab	-11.2	-10.4
253	ZINC000000607726	Bemetizide	World_NOT_FDA	-11.2	-10.3
254	ZINC000004655034	Zeta1-Tocopherol	Metab	-11.2	-10.3
255	ZINC000001530605		World_NOT_FDA	-11.2	-10.2
256	LMST01130066	BufogargarizinC	Sterols	-11.1	-13
257	ZINC000064033452	Lumacaftor	FDA	-11.1	-12.2
258	LMST01010167	3-dehydro-4-methylzymosterol	Chol, Sterols	-11.1	-12.1
259	LMST01031057	cholesta-5,24(28),25-trien-3beta-ol	Erg, Sterols	-11.1	-12
260	LMST01030096	22,23-dihydrobrassicasterol	Erg, Sterols	-11.1	-11.9
261	LMST01030105	Fungisterol	Erg, Sterols	-11.1	-11.9
262	ZINC000004073895	4,6-Cholestadien-3-One	Metab	-11.1	-11.8
263	LMST01010174	5alpha-cholestanone	Chol, Sterols	-11.1	-11.8
264	LMST04030217	(25R)-Delta(4)-dafachronicacid	DeltaL, Sterol_Lipids	-11.1	-11.7
265	LMST03020658	3-Fluoro-9,10-secocholesta-5,7,10(19)-triene	Sterol_Lipids	-11.1	-11.7
266	ZINC000008618002		World_NOT_FDA	-11.1	-11.7
267	LMST01010254	cholesta-4,6,8(14)-trien-3beta-ol	Chol, Sterols	-11.1	-11.6
268	LMST01050020	24S,28R-methylene-stigmast-5-en-3beta-ol	Sterols	-11.1	-11.6
269	LMST01010349	1-(5alpha)-cholestenone	Chol, Sterols	-11.1	-11.6
270	LMST01120000	Cardanolideskeleton	Sterols	-11.1	-11.6
271	LMST01031116	22S-hydroxy-campest-4-en-3-one	Erg, Sterols	-11.1	-11.5
272	LMST01040154	Delta7-Avenasterol	DeltaL, Sterols	-11.1	-11.5
273	ZINC000095636507	Dihydrobrassicasterol	Metab	-11.1	-11.5
274	ZINC000118912450	Oxymetholone	FDA	-11.1	-11.5
275	ZINC000000000706	Sanguinarine	Metab	-11.1	-11.4
276	LMST01031028	Codisterol	Erg, Sterols	-11.1	-11.3
277	LMST03010017	isotachysterol2	Sterol_Lipids	-11.1	-11.3
278	LMST01031113	NebrosteroidM	Erg, Sterols	-11.1	-11.3
279	LMST01040263	Stigmast-4-ene-3,6-dione	Sterols	-11.1	-11.2
280	LMST01150006	Verazine	Sterols	-11.1	-11.1
281	LMST03020220	(5E)-vitaminD3/(5E)-cholecalciferol/(5E)-calciol	Sterol_Lipids	-11.1	-11
282	LMST01160009	Minabeolide-8	Sterols	-11.1	-11
283	LMST03010014	(5E)-vitaminD2/5,6-trans-vitaminD2/(5E)-ergocalciferol/(5E)-ercalciol	Sterol_Lipids	-11.1	-10.9
284	ZINC000002526765	Cypermethrin	World_NOT_FDA	-11.1	-10.9
285	ZINC000004175630	Orap	FDA	-11.1	-10.9
286	LMST01040141	poriferast-8-en-3beta-ol	Sterols	-11.1	-10.8
287	LMST05010024	6-dehydrotestosterone17-glucosiduronicacid	Steroids, Androgens, Sterol_Lipids	-11.1	-10.8
288	ZINC000253609253	alpha-Spinasterol	Metab	-11.1	-10.8
289	ZINC000029391220		World_NOT_FDA	-11.1	-10.8
290	ZINC000002563085	Estradiol	World_NOT_FDA	-11.1	-10.7
291	ZINC000001485935	isavuconazole	FDA	-11.1	-10.7
292	ZINC000014712188	Sorgolactone	Metab	-11.1	-10.7
293	LMST01031002	Ergosta-5,7,22E,24(28)-tetraenol	Erg, Sterols	-11.1	-10.6
294	ZINC000003255767		Metab	-11.1	-10.6
295	ZINC000253388218	(+)-Zeylenol	Metab	-11.1	-10.5
296	LMST02030160	9,11alpha-epoxypregn-4-ene-3,20-dione	Steroids, Estrogens, Sterol_Lipids	-11.1	-10.5
297	LMST02030159	progesterone	Steroids, DeltaL, Estrogens, Sterol_Lipids	-11.1	-10.5
298	LMST01031155	Talarosterone	Erg, Sterols	-11.1	-10.5
299	LMST02020120	11-ketoTestosterone	Steroids, Androgens, Sterol_Lipids	-11.1	-10.4
300	ZINC000001530604		World_NOT_FDA	-11.1	-10.4
301	ZINC000003798603		World_NOT_FDA	-11.1	-10.4
302	ZINC000003875484	androxy	FDA	-11.1	-10.3
303	ZINC000004096611		Metab	-11.1	-10.3
304	LMST02030161	17alpha-hydroxyprogesterone	Steroids, Estrogens, Sterol_Lipids	-11.1	-10.2
305	LMST02020083	3,17-dioxoandrost-4-en-19-al	Steroids, DeltaL, Androgens, Sterol_Lipids	-11.1	-10.2
306	ZINC000006092801	Haloperidol1,2,3,6-Tetrahydropyridine	World_NOT_FDA	-11.1	-10.2
307	LMST01030135	5-dehydroepisterol	Erg, Sterols	-11	-12.1
308	LMST01031176	Ergosta-4,6,8(14),22E-tetraen-3-one	Erg, Sterols	-11	-12.1
309	LMST01130067	3beta,5beta,10beta,14beta-tetrahydroxy-19-norbufa-20,22-dienolide	Sterols	-11	-12
310	ZINC000030729704	5-Dehydroavenasterol	Metab	-11	-12
311	LMST03060001	VitaminD7	Sterol_Lipids	-11	-12
312	LMST01010297	24-ketocholestanol	Chol, Sterols	-11	-11.8
313	LMST01050016	25-Methyl-24-isopropenyl-22E-dehydrocholesterol	Sterols	-11	-11.7
314	LMST01030104	24-methylene,25-methylcholesta-5-en-3beta-ol	Erg, Sterols	-11	-11.6
315	LMST01050014	24-Isopropyl-cholesterol	Sterols	-11	-11.5
316	LMST01040162	28-Isofucostanol	Sterols	-11	-11.5
317	LMST03020618	3-DeoxyvitaminD3	Sterol_Lipids	-11	-11.5
318	ZINC000005761341	campestanol	Metab	-11	-11.5
319	LMST01100002	cycloartanol	Sterols	-11	-11.5
320	LMST03020333	6-methylprevitaminD3/6-methylprecholecalciferol	Sterol_Lipids	-11	-11.4
321	ZINC000006569100	campestrol	Metab	-11	-11.4
322	ZINC000004654793		World_NOT_FDA	-11	-11.4
323	LMST01060013	23-demethyl-4alpha-methyl-5alpha-gorgostan-3beta-ol	Sterols	-11	-11.3
324	LMST03020233	(5E)-1alpha-hydroxyvitaminD3/(5E)-1alpha-hydroxycholecalciferol	Sterol_Lipids	-11	-11.3
325	LMST01031034	24(28)-dehydroaplysterol	Erg, Sterols	-11	-11.2
326	LMST01030124	6-Deoxocathasterone	Erg, Sterols	-11	-11.2
327	LMST01030098	Brassicasterol	Erg, Sterols	-11	-11.2
328	LMST01110006	Petrosterol	Sterols	-11	-11.2
329	LMST01031041	Stelliferasterol	Erg, Sterols	-11	-11.2
330	LMST01050019	24-Isopropenylcholesterol	Sterols	-11	-11.1
331	LMST01130002	Scillirosidin	Sterols	-11	-11.1
332	LMST01040266	Stigmastanol	Sterols	-11	-11.1
333	LMST01010170	zymosterolintermediate1c	Chol, Sterols	-11	-11.1
334	LMST03020143	(5Z)-4,4-difluoro-1alpha,25-dihydroxyvitaminD3/(5Z)-4,4-difluoro-1alpha,25-dihydroxycholecalciferol	Sterol_Lipids	-11	-11
335	LMST01040159	28-methylxestosterol	Sterols	-11	-10.9
336	ZINC000095619124	3-Cis-HydroxycyclohexylGlyburide	World_NOT_FDA	-11	-10.9
337	ZINC000000537805	diabeta	FDA	-11	-10.9
338	LMST01010098	Epi-cholestanol	Chol, Sterols	-11	-10.9
339	LMST03020217	1alpha-hydroxy-3-deoxyvitaminD3/1alpha-hydroxy-3-deoxycholecalciferol	Sterol_Lipids	-11	-10.8
340	LMST05050028	17-beta-estradiolglucuronide	Steroids, Sterol_Lipids	-11	-10.6
341	LMST05010026	17alpha-estradiol3-glucosiduronicacid	Steroids, Sterol_Lipids	-11	-10.6
342	LMST05010018	17beta-Estradiol3-sulfate-17-(beta-D-glucuronide)	Steroids, Sterol_Lipids	-11	-10.6
343	ZINC000000601229	azelastine	FDA	-11	-10.6
344	ZINC000256430521	Stigmastane-3,6-dione	Metab	-11	-10.6
345	ZINC000000538453	tiazuril	Metab	-11	-10.6
346	LMST01100012	(25R)-12alpha-hydroxy-24R,26R-dimethyl-26,27-cyclo-cholest-4-en-3,6-dione	Sterols	-11	-10.5
347	LMST03020567	1beta,25-dihydroxy-3-deoxy-19-nor-22-oxavitaminD3/1beta,25-dihydroxy-3-deoxy-19-nor-22-oxacholecalciferol	Sterol_Lipids	-11	-10.5
348	LMST03020616	2alpha-Fluoro-19-nor-22-oxa-1alpha,25-dihydroxyvitaminD3	Sterol_Lipids	-11	-10.5
349	ZINC000019132424	E-Guggulsterone	World_NOT_FDA	-11	-10.5
350	ZINC000095919483		Metab	-11	-10.5
351	ZINC000005854565	licoricidin	Metab	-11	-10.4
352	ZINC000043206370	niraparib	FDA	-11	-10.4
353	ZINC000001999441		FDA	-11	-10.4
354	LMST02030184	11alpha-hydroxyprogesterone	Steroids, Estrogens, Sterol_Lipids	-11	-10.3
355	ZINC000005158963	licoisoflavone	Metab	-11	-10.3
356	ZINC000001597393	neorautone	Metab	-11	-10.3
357	ZINC000013828184	Perospirone	World_NOT_FDA	-11	-10.3
358	LMST02020057	Testosteroneacetate	Steroids, Androgens, Sterol_Lipids	-11	-10.3
359	ZINC000014825436	umbelliferonefarnesylether	Metab	-11	-10.3
360	ZINC000000900910	xi-8-acetonyldihydrosanguinarine	Metab	-11	-10.3
361	ZINC000013507165		Metab	-11	-10.2
362	LMST01080000	Spirostaneskeleton	Sterols	-10.9	-13
363	LMST01130068	BufogargarizinC	Sterols	-10.9	-12.5
364	ZINC000003784182	differin	FDA	-10.9	-12.3
365	LMST01080002	(25R)-5beta-spirostan-1beta,3alpha-diol	Sterols	-10.9	-12.2
366	LMST01130014	11alpha-hydroxytelocinobufagin	Sterols	-10.9	-12.2
367	LMST03060002	ProvitaminD7	Sterol_Lipids	-10.9	-12.2
368	LMST01130025	Telocinobufagin	Sterols	-10.9	-12.2
369	LMST04030223	(25S)-delta(1,7)-dafachronicacid	DeltaL, Sterol_Lipids	-10.9	-12.1
370	LMST01010248	3-ketocholesterol	Chol, Sterols, DeltaL	-10.9	-12
371	LMST01010015	Cholestenone	Chol, Sterols, DeltaL	-10.9	-12
372	LMST01010289	cholest-5-en-23-yn-3beta-ol	Chol, Sterols	-10.9	-11.9
373	LMST04030221	(25S)-Delta(4)-dafachronicacid	DeltaL, Sterol_Lipids	-10.9	-11.9
374	LMST01030100	4alpha-methyl,24-methylene-cholest-7-en-3beta-ol	Erg, Sterols	-10.9	-11.8
375	LMST04030218	(25R)-Delta(7)-dafachronicacid	DeltaL, Sterol_Lipids	-10.9	-11.8
376	LMST03020147	24,25-didehydrovitaminD3/24,25-didehydrocholecalciferol	Sterol_Lipids	-10.9	-11.8
377	LMST03020080	26,26,26,27,27,27-hexafluoro-1alpha,25-dihydroxy-23,23,24,24-tetradehydrovitaminD3/26,26,26,27,27,27-hexafluoro-1alpha,25-dihydroxy-23,23,24,24-tetradehydrocholecalciferol	Sterol_Lipids	-10.9	-11.8
378	ZINC000004097468	Testosterone	World_NOT_FDA	-10.9	-11.8
379	LMST03040002	VitaminD5	Sterol_Lipids	-10.9	-11.8
380	LMST01010243	Cholest-5-ene	Chol, Sterols	-10.9	-11.7
381	LMST01080005	(25R)-5beta-spirostan-3beta-ol	Sterols	-10.9	-11.6
382	LMST01110008	24,26-cyclocholesterol	Sterols	-10.9	-11.6
383	LMST01040131	24-ethylcholesta-5,24-dien-3beta-ol	Sterols	-10.9	-11.5
384	LMST01120001	Digitoxigenin	Sterols	-10.9	-11.5
385	LMST01010446	3beta,4beta-dihydroxycholest-8(9)-en-23-one	Chol, Sterols	-10.9	-11.4
386	LMST01031025	ergosta-4,7,22E-trien-3beta-ol	Erg, Sterols	-10.9	-11.3
387	LMST01040137	stigmasta-7,25-dien-3beta-ol	Sterols	-10.9	-11.3
388	LMST01040176	22S,23S-epoxy-5alpha-stigmast-8(9),14(15)-dien-3beta-ol	Sterols	-10.9	-11.3
389	LMST01031019	4alpha-Methylfecosterol	Erg, Sterols	-10.9	-11.3
390	ZINC000003921872	dovonex	FDA	-10.9	-11.3
391	LMST03020124	(23R,25S)-1alpha,25-dihydroxyvitaminD326,23-lactone/(23R,25S)-1alpha,25-dihydroxycholecalciferol26,23-lactone	Sterol_Lipids	-10.9	-11.2
392	LMST03020214	(5E,10Z)-19-fluoro-1alpha,25-dihydroxyvitaminD3/(5E,10Z)-19-fluoro-1alpha,25-dihydroxycholecalciferol	Sterol_Lipids	-10.9	-11.2
393	ZINC000005845755	isomahanine	Metab	-10.9	-11.2
394	LMST04030163	paricalcitol	Sterol_Lipids	-10.9	-11.2
395	LMST04030124	12alpha-Hydroxycholest-4-en-3-one	Sterol_Lipids	-10.9	-11.1
396	LMST01040145	Isofucosterol	DeltaL, Sterols	-10.9	-11.1
397	ZINC000002563650	isoglycycoumarin	Metab	-10.9	-11.1
398	LMST01040191	NorselicacidB	Sterols	-10.9	-11.1
399	ZINC000001557161	trp-trp	Metab	-10.9	-11.1
400	LMST03020444	(17E)-1alpha,25-dihydroxy-26,27-dimethyl-17,20,22,22,23,23-hexadehydro-24a-homovitaminD3/(17E)-1alpha,25-dihydroxy-26,27-dimethyl-17,20,22,22,23,23-hexadehydro-24a-homocholecalciferol	Sterol_Lipids	-10.9	-11
401	LMST01031021	Dinosterol	Erg, Sterols	-10.9	-11
402	LMST01031048	27-nor-(24R)-methylcholest-5,22E-dien-3beta-ol	Erg, Sterols	-10.9	-10.9
403	ZINC000003816287	axitinib	FDA	-10.9	-10.9
404	ZINC000005844788	Nebivolol	FDA	-10.9	-10.9
405	ZINC000003932831	avodart	FDA	-10.9	-10.8
406	LMST03010056	dihydrotachysterol2/(5E)-(10S)-10,19-dihydrovitaminD2/(5E)-(10S)-10,19-dihydroergocalciferol	Sterol_Lipids	-10.9	-10.8
407	ZINC000003881556	Estradiol	World_NOT_FDA	-10.9	-10.8
408	LMST01031222	Sarcophytosterol	Erg, Sterol_Lipids	-10.9	-10.8
409	LMST02010020	3beta-hydroxy-estra-5,7,9-trien-17-one	Steroids, Sterol_Lipids	-10.9	-10.7
410	LMST04010324	(20S,22E)-3beta-Hydroxy-5alpha-chol-22-en-24-oic Acid	Sterol_Lipids	-10.9	-10.7
411	LMST02030153	(20R)-20-hydroxypregn-4-en-3-one	Steroids, Estrogens, Sterol_Lipids	-10.9	-10.7
412	LMST03020225	(5E)-isovitaminD3/(5E)-isocholecalciferol	Sterol_Lipids	-10.9	-10.7
413	LMST02030152	20-hydroxypregn-4-en-3-one	Steroids, Estrogens, Sterol_Lipids	-10.9	-10.7
414	ZINC000006117750	Desmethylazelastine	World_NOT_FDA	-10.9	-10.7
415	ZINC000000968276	Troglitazone	World_NOT_FDA	-10.9	-10.7
416	ZINC000000899902	psoralidin	Metab	-10.9	-10.6
417	LMST01160019	WithanolideA	Sterols	-10.9	-10.6
418	LMST02010007	3-hydroxy-estra-1,3,5(10),6,8-pentaen-17-one	Steroids, Sterol_Lipids	-10.9	-10.5
419	ZINC000000001246	Dapiprazole	World_NOT_FDA	-10.9	-10.5
420	ZINC000095618768	FlurbiprofenGlucuronide	World_NOT_FDA	-10.9	-10.5
421	ZINC000004096020	5b-cholestan-3-one	Metab	-10.9	-10.4
422	LMST02020114	9,17-hydroxy-androsta-1,4-dien-3-one	Steroids, Androgens, Sterol_Lipids	-10.9	-10.4
423	ZINC000001658458	artocarpesin	Metab	-10.9	-10.4
424	ZINC000001530975	butenafine	FDA	-10.9	-10.4
425	ZINC000003872177	Cypermethrin	World_NOT_FDA	-10.9	-10.4
426	ZINC000077287124	n-desmethyleletriptan	Metab, World_NOT_FDA	-10.9	-10.4
427	ZINC000035457583		Metab	-10.9	-10.4
428	LMST02020025	Fluoxymesterone	Steroids, Androgens, Sterol_Lipids	-10.9	-10.3
429	LMST01050011	Ophirasterol	Sterols	-10.9	-10.3
430	ZINC000003964325	sunitinib	FDA	-10.9	-10.3
431	ZINC000000900914	xi-8-acetonyldihydrosanguinarine	Metab	-10.9	-10.3
432	ZINC000004262223	zymostanol	Metab	-10.9	-10.3
433	ZINC000034106859		Metab	-10.9	-10.3
434	LMST02030243	ClathroidB	Steroids, Estrogens, Sterol_Lipids	-10.9	-10.2
435	ZINC000014658239	dehydropipernoline	Metab	-10.9	-10.2
436	ZINC000014648318	gancaoninp	Metab	-10.9	-10.2
437	GMJ	Haloperidol	PDB	-10.9	-10.2
438	ZINC000002013188	Phenothrin	World_NOT_FDA	-10.9	-10.2
439	ZINC000003875357	prednisone	FDA	-10.9	-10.2
440	ZINC000253604821		Metab	-10.9	-10.2
441	LMST03020117	(23R,25S)-25-hydroxyvitaminD326,23-lactone/(23R,25S)-25-hydroxycholecalciferol26,23-lactone	Sterol_Lipids	-10.8	-12.5
442	LMST01030109	24-methylcholesta-5,23E-dien-3Î²-ol	Erg, Sterols	-10.8	-12.4
443	LMST01010385	3beta-acetoxy-cholest-5-en-7-one	Chol, Sterols	-10.8	-12.1
444	LMST03020081	(22E)-26,26,26,27,27,27-hexafluoro-25-hydroxy-22,23-didehydrovitaminD3/(22E)-26,26,26,27,27,27-hexafluoro-25-hydroxy-22,23-didehydrocholecalciferol	Sterol_Lipids	-10.8	-12.1
445	LMST04030222	(25S)-Delta(7)-dafachronicacid	DeltaL, Sterol_Lipids	-10.8	-12.1
446	LMST03020085	26,26,26,27,27,27-hexafluoro-1alphaa-hydroxyvitaminD3/26,26,26,27,27,27-hexafluoro-1alphaa-hydroxycholecalciferol	Sterol_Lipids	-10.8	-12.1
447	LMST03020079	26,26,26,27,27,27-hexafluoro-25-hydroxy-23,23,24,24-tetradehydrovitaminD3/26,26,26,27,27,27-hexafluoro-25-hydroxy-23,23,24,24-tetradehydrocholecalciferol	Sterol_Lipids	-10.8	-12.1
448	LMST01030099	Chalinasterol	Erg, Sterols	-10.8	-12
449	LMST01010066	Zymosterol	Chol, Sterols	-10.8	-12
450	LMST03020599	(23S)-1alpha-hydroxy-25,27-didehydrovitaminD326,23-lactone	Sterol_Lipids	-10.8	-11.9
451	LMST01010299	24-keto-25dehydrocholesterol	Chol, Sterols	-10.8	-11.9
452	LMST01110014	Glaucasterol	Sterols	-10.8	-11.9
453	LMST01060036	KlyflaccisteroidD	Sterol_Lipids	-10.8	-11.9
454	ZINC000030729814	(22alpha)-hydroxy-campest-4-en-3-one	Metab	-10.8	-11.8
455	LMST03010019	(5E)-isovitaminD2/(5E)-isoergocalciferol	Sterol_Lipids	-10.8	-11.8
456	LMST03020076	1alpha,26,26,26,27,27,27-heptafluoro-25-hydroxy-16,17,23,23,24,24-hexadehydrovitaminD3/1alpha,26,26,26,27,27,27-heptafluoro-25-hydroxy-16,17,23,23,24,24-hexadehydrocholecalciferol	Sterol_Lipids	-10.8	-11.7
457	LMST01010300	24-keto-25dehydrocholestanol	Chol, Sterols	-10.8	-11.7
458	ZINC000012494196	cholesterolsulfate	Metab	-10.8	-11.7
459	LMST03030001	VitaminD4	Sterol_Lipids	-10.8	-11.7
460	LMST01031037	Mutasterol	Erg, Sterols	-10.8	-11.6
461	LMST03020154	1alpha,25-dihydroxy-9,11-didehydro-3-deoxyvitaminD3/1alpha,25-dihydroxy-9,11-didehydro-3-deoxycholecalciferol	Sterol_Lipids	-10.8	-11.5
462	LMST03020678	22-HydroxyvitaminD3	Sterol_Lipids	-10.8	-11.5
463	LMST01030125	3-Dehydro-6-deoxoteasterone	Erg, Sterols	-10.8	-11.5
464	LMST03010069	Doxercalciferol	Sterol_Lipids	-10.8	-11.5
465	LMST03020253	(7E)-(3S,6S)-6-hydroperoxy-9,10-seco-4,7,10(19)-cholestatrien-3-ol	Sterol_Lipids	-10.8	-11.4
466	LMST03020221	(5E)-3-epivitaminD3/(5E)-3-epicholecalciferol	Sterol_Lipids	-10.8	-11.4
467	LMST01100000	9beta,19-cyclo-lanostaneskeleton	Sterols	-10.8	-11.4
468	LMST01010077	Dihydrocholesterol	Chol, Sterols	-10.8	-11.4
469	LMST01031053	24S-isopropenyl-cholesterol	Erg, Sterols	-10.8	-11.3
470	LMST01040124	Clerosterol	Sterols	-10.8	-11.3
471	LMST01040132	stigmasta-5,22E,25-trien-3beta-ol	Sterols	-10.8	-11.2
472	LMST01010365	Zymostenol-d7	Chol, Sterols	-10.8	-11.2
473	LMST04030213	(25S)-3-oxo-cholest-1,4-dien-26-oic acid	Sterol_Lipids	-10.8	-11.1
474	LMST03020017	(5E)-(22R)-22-hydroxy-24,25,26,27-tetranorvitaminD3/(5E)-(22R)-22-hydroxy-24,25,26,27-tetranorcholecalciferol	Sterol_Lipids	-10.8	-11.1
475	LMST03020552	1alpha,25-dihydroxy-2-methylene-19-norvitaminD3/1alpha,25-dihydroxy-2-methylene-19-norcholecalciferol	Sterol_Lipids	-10.8	-11.1
476	LMST01031085	ConicasterolB	Erg, Sterols	-10.8	-11.1
477	LMST01031020	Delta8,14-Sterol	Erg, Sterols, DeltaL	-10.8	-11.1
478	LMST01040130	Poriferasterol	Sterols	-10.8	-11.1
479	ZINC000001557163	trp-trp	Metab	-10.8	-11.1
480	LMST01010096	Zymostenol	Chol, Sterols	-10.8	-11.1
481	LMST03020082	(22E)-26,26,26,27,27,27-hexafluoro-1alpha,25-dihydroxy-22,23-didehydrovitaminD3/(22E)-26,26,26,27,27,27-hexafluoro-1alpha,25-dihydroxy-22,23-didehydrocholecalciferol	Sterol_Lipids	-10.8	-11
482	LMST03020083	(23E)-26,26,26,27,27,27-hexafluoro-1alpha,25-dihydroxy-23,24-didehydrovitaminD3/(23E)-26,26,26,27,27,27-hexafluoro-1alpha,25-dihydroxy-23,24-didehydrocholecalciferol	Sterol_Lipids	-10.8	-11
483	ZINC000030729696	5-Dehydroavenasterol	Metab	-10.8	-11
484	LMST01031044	Ficisterol	Erg, Sterols	-10.8	-11
485	LMST01040193	geodisterol-O-sulfite	Sterols	-10.8	-11
486	ZINC000001557162	trp-trp	Metab	-10.8	-11
487	ZINC000001557164	trp-trp	Metab	-10.8	-11
488	LMST01100004	14-Nor-24-Methyl-9beta,19-cyclo-lanostan-3beta-ol	Sterols	-10.8	-10.9
489	ZINC000001532100	asana	Metab	-10.8	-10.9
490	ZINC000013130928	glabrone	Metab	-10.8	-10.9
491	ZINC000004095717	Harzol	Metab, World_NOT_FDA	-10.8	-10.9
492	ZINC000004082125	kopeodin	Metab	-10.8	-10.9
493	ZINC000005380738	kopeodin	Metab	-10.8	-10.9
494	ZINC000005380740	kopeodin	Metab	-10.8	-10.9
495	ZINC000015214245	kopeodin	Metab	-10.8	-10.9
496	LMST03020222	previtaminD3/precholecalciferol/(6Z)-tacalciol	Sterol_Lipids	-10.8	-10.9
497	ZINC000253609252	alpha-Spinasterol	Metab	-10.8	-10.8
498	ZINC000003869855	Dicumarol	World_NOT_FDA	-10.8	-10.8
499	LMST02010039	Estradiolvalerate	Steroids, Sterol_Lipids	-10.8	-10.8
500	ZINC000004099004	EstroneGlucuronide	World_NOT_FDA	-10.8	-10.8
501	ZINC000004098719	glabridin	Metab	-10.8	-10.8
502	ZINC000015206004	murrayanol	Metab	-10.8	-10.8
503	ZINC000051951647	Panobinostat	FDA	-10.8	-10.8
504	ZINC000000538174	Picotamide	World_NOT_FDA	-10.8	-10.8
505	LMST03020223	tachysterol3	Sterol_Lipids	-10.8	-10.8
506	LMST01040181	TheonellasterolB	Sterols	-10.8	-10.8
507	LMST01030139	4,24-Dimethylcholest-24-en-3beta-ol	Erg, Sterols	-10.8	-10.7
508	ZINC000000899797	(r)-glabridin	Metab	-10.8	-10.7
509	LMST01010291	19-norcholestanol	Chol, Sterols	-10.8	-10.7
510	LMST01010182	2-deoxyecdysone	Chol, Sterols	-10.8	-10.7
511	ZINC000001532097	asana	Metab	-10.8	-10.7
512	ZINC000000538564	casodex	FDA	-10.8	-10.7
513	ZINC000000597013	donepezil	FDA	-10.8	-10.7
514	ZINC000038147404	(+)-Sesamin	Metab	-10.8	-10.6
515	LMST02030186	corticosterone	Steroids, Estrogens, Sterol_Lipids	-10.8	-10.6
516	ZINC000003791931	d-tocotrienol	Metab	-10.8	-10.6
517	ZINC000002545077	Dihydrocholesterol	Metab	-10.8	-10.6
518	ZINC000022010649	panobinostat	FDA	-10.8	-10.6
519	ZINC000028870000		World_NOT_FDA	-10.8	-10.6
520	LMST01031050	24-nor-cholest-5,22E-dien-3beta-ol	Erg, Sterols	-10.8	-10.5
521	LMST01040164	(25Z)-26-methylstrongylosterol	Sterols	-10.8	-10.5
522	LMST03020557	1alpha,25-dihydroxy-2-methylene-19-nor-20-epivitaminD3/1alpha,25-dihydroxy-2-methylene-19-nor-20-epicholecalciferol	Sterol_Lipids	-10.8	-10.5
523	ZINC000018258326	desamin	Metab	-10.8	-10.5
524	ZINC000004214603	halobetasol	FDA	-10.8	-10.5
525	ZINC000100017856	mepron	FDA	-10.8	-10.5
526	ZINC000014610053	MoracinD	Metab	-10.8	-10.5
527	ZINC000003861782	ota	Metab	-10.8	-10.5
528	LMST01010179	2,22,25-trideoxyecdysone	Chol, Sterols	-10.8	-10.4
529	LMST01010187	25-deoxyecdysone	Chol, Sterols	-10.8	-10.4
530	LMST02030122	Fludrocortisoneacetate	Steroids, Estrogens, Sterol_Lipids	-10.8	-10.4
531	ZINC000001851132	Pemetrexed	World_NOT_FDA	-10.8	-10.4
532	ZINC000001996306	Cypermethrin	World_NOT_FDA	-10.8	-10.3
533	LMST02020026	Formyldienolone	Steroids, Androgens, Sterol_Lipids	-10.8	-10.3
534	ZINC000019632700	Naftopidil	World_NOT_FDA	-10.8	-10.3
535	ZINC000004073977	sitostenone	Metab	-10.8	-10.3
536	ZINC000014762969	gancaoninn	Metab	-10.8	-10.2
537	ZINC000004026533	isoglabranin	Metab	-10.8	-10.2
538	ZINC000014762755	licoflavonol	Metab	-10.8	-10.2
539	ZINC000008214619		FDA	-10.8	-10.2
540	LMST01040155	5-Dehydro-avenasterol	Sterols	-10.7	-12.4
541	LMST03020101	(23Z)-25-hydroxy-16,17,23,24-tetradehydrovitaminD3/(23Z)-25-hydroxy-16,17,23,24-tetradehydrocholecalciferol	Sterol_Lipids	-10.7	-12.3
542	ZINC000224657532	Bictegravir	World_NOT_FDA	-10.7	-12.3
543	LMST01031090	NorselicacidC	Erg, Sterols	-10.7	-12.3
544	LMST01030110	24-methylcholesta-5,24-dien-3Î²-ol	Erg, Sterols	-10.7	-12.2
545	LMST05020012	24-methylene-cholesterolsulfate	Sterol_Lipids	-10.7	-12
546	LMST03020137	24,24-difluoro-1alpha-hydroxyvitaminD3/24,24-difluoro-1alpha-hydroxycholecalciferol	Sterol_Lipids	-10.7	-12
547	LMST01031162	3beta,4beta-dihydroxyergosta-24(28)-en-23-one	Erg, Sterols	-10.7	-12
548	LMST01010133	24-oxocholesterol	Chol, Sterols	-10.7	-11.9
549	LMST01030111	epicodisterol	Erg, Sterols	-10.7	-11.9
550	LMST01130024	Desacetylbufotalin	Sterols	-10.7	-11.8
551	LMST01130004	Hellebrigenin	Sterols	-10.7	-11.8
552	ZINC000077269419	N-OxideAbirateroneSulfate	World_NOT_FDA	-10.7	-11.8
553	LMST03020084	1alpha-fluoro-25-hydroxy-16,17,23,23,24,24-hexadehydrovitaminD3/1alpha-fluoro-25-hydroxy-16,17,23,23,24,24-hexadehydrocholecalciferol	Sterol_Lipids	-10.7	-11.7
554	LMST01030097	Campesterol	Erg, Sterols	-10.7	-11.7
555	LMST01100030	Cycloarta-23-ene-3beta,25-diol	Sterols	-10.7	-11.7
556	ZINC000004080967	ligupersina	Metab	-10.7	-11.7
557	LMST01110013	Nicasterol	Sterols	-10.7	-11.7
558	LMST03020479	1alpha-hydroxy-22-[3-(1-hydroxy-1-methylethyl)phenyl]-23,24,25,26,27-pentanorvitaminD3/1alpha-hydroxy-22-[3-(1-hydroxy-1-methylethyl)phenyl]-23,24,25,26,27-pentanorcholecalciferol	Sterol_Lipids	-10.7	-11.6
559	LMST04010235	3-Oxochola-4,6-dien-24-oic Acid	Sterol_Lipids	-10.7	-11.5
560	LMST03010045	1beta,25-dihydroxy-24-epivitaminD2/1beta,25-dihydroxy-24-epiergocalciferol	Sterol_Lipids	-10.7	-11.5
561	LMST03020087	6,19-epidioxy-26,26,26,27,27,27-hexafluoro-25-hydroxy-6,19-dihydrovitaminD3/6,19-epidioxy-26,26,26,27,27,27-hexafluoro-25-hydroxy-6,19-dihydrocholecalciferol	Sterol_Lipids	-10.7	-11.5
562	LMST01010000	Cholestaneskeleton	Chol, Sterols	-10.7	-11.5
563	LMST01030108	stigmast-22E-en-3β-ol	Erg, Sterols	-10.7	-11.5
564	LMST03050001	VitaminD6	Sterol_Lipids	-10.7	-11.5
565	LMST01040142	24-ethylcholesta-5,23E-dien-3beta-ol	Sterols	-10.7	-11.4
566	LMST01040173	24-ethyl-23,26-dimethylcholest-5,24E(28)-dien-3beta-ol	Sterols	-10.7	-11.4
567	LMST04010396	3,12-Dioxochola-4,6-dien-24-oic Acid	Sterol_Lipids	-10.7	-11.4
568	LMST03020146	(6RS)-6,19-epidioxy-24,24-difluoro-25-hydroxy-6,19-dihydrovitaminD3/(6RS)-6,19-epidioxy-24,24-difluoro-25-hydroxy-6,19-dihydrocholecalciferol	Sterol_Lipids	-10.7	-11.4
569	LMST03020103	1alpha-hydroxy-24-oxo-26,27-cyclovitaminD3/1alpha-hydroxy-24-oxo-26,27-cyclocholecalciferol	Sterol_Lipids	-10.7	-11.4
570	LMST01031077	22R,23S-epoxy-5α-campest-9(11)-en-3β,6α,20S-triol	Erg, Sterols	-10.7	-11.3
571	ZINC000014766825	br-xanthonea	Metab	-10.7	-11.3
572	LMST01120004	cannogenin	Sterols	-10.7	-11.3
573	ZINC000003782599	proscar	FDA	-10.7	-11.3
574	LMST03020200	(5E,10Z)-19-fluorovitaminD3/(5E,10Z)-19-fluorocholecalciferol	Sterol_Lipids	-10.7	-11.2
575	LMST01031066	24-methylene-cholest-5-en-3β,19-diol	Erg, Sterols	-10.7	-11.2
576	LMST01031033	Aplysterol	Erg, Sterols	-10.7	-11.2
577	LMST01040122	Clionasterol	Sterols	-10.7	-11.2
578	LMST03040003	ProvitaminD5	Sterol_Lipids	-10.7	-11.2
579	LMST01040140	Spinasterol	Sterols	-10.7	-11.2
580	ZINC000004096712	Stigmasterin	Metab, World_NOT_FDA	-10.7	-11.2
581	ZINC000257446275	(3beta,5alpha,22E,24S)-Stigmasta-7,22,25-trien-3-ol	Metab	-10.7	-11.1
582	LMST03020609	1alpha,25-Dihydroxy-16-ene-19-nor-24-oxovitaminD3	Sterol_Lipids	-10.7	-11.1
583	LMST01010317	22Z-dehydrocholesterol	Chol, Sterols	-10.7	-11.1
584	LMST01010225	4,4-Dimethylcholest-8-enol	Chol, Sterols	-10.7	-11.1
585	ZINC000100051144	yellowaamx	Metab	-10.7	-11.1
586	LMST01040121	24Z-ethylidene-cholest-5-en-3-ol	Sterols	-10.7	-11
587	LMST01040143	stigmasta-8,22E-dien-3beta-ol	Sterols	-10.7	-11
588	LMST01010311	12β-hydroxy-24-norcholesta-1,4,22E-trien-3-one	Chol, Sterols	-10.7	-11
589	LMST03020226	toxisterol3D1	Sterol_Lipids	-10.7	-11
590	ZINC000095619724	yellowaamx	Metab	-10.7	-11
591	LMST03020265	(5E)-1alpha,25-dihydroxyvitaminD3/(5E)-1alpha,25-dihydroxycholecalciferol	Sterol_Lipids	-10.7	-10.9
592	ZINC000001532098	asana	Metab	-10.7	-10.9
593	LMST03020313	calicoferolD	Sterol_Lipids	-10.7	-10.9
594	LMST01040129	Sitosterol	Sterols	-10.7	-10.9
595	LMST03020227	toxisterol3E1	Sterol_Lipids	-10.7	-10.9
596	ZINC000001851149	abilify	FDA	-10.7	-10.8
597	ZINC000003973334	aromasin	FDA	-10.7	-10.8
598	LMST01100033	Cycloart-23-ene-3beta,25-diolmethylether	Sterol_Lipids	-10.7	-10.8
599	LMST01040160	Isostelliferasterol	Sterols	-10.7	-10.8
600	LMST01040150	4alpha-methyl-24-ethyl-5alpha-cholest-22-en-3beta-ol	Sterols	-10.7	-10.7
601	LMST03020248	(6R)-6,19-epidioxy-6,19-dihydrovitaminD3/(6R)-6,19-epidioxy-6,19-dihydrocholecalciferol	Sterol_Lipids	-10.7	-10.7
602	ZINC000000897408	casodex	FDA	-10.7	-10.7
603	ZINC000011616657		World_NOT_FDA	-10.7	-10.7
604	ZINC000033972992		World_NOT_FDA	-10.7	-10.7
605	ZINC000033972993		World_NOT_FDA	-10.7	-10.7
606	LMST01040147	4-methyl-stigmastan-3beta-ol	Sterols	-10.7	-10.6
607	LMST01040163	(25E)-26-methylstrongylosterol	Sterols	-10.7	-10.6
608	ZINC000013515301	17-Beta-EstradiolGlucuronide	World_NOT_FDA	-10.7	-10.6
609	LMST03020647	24,24-Difluoro-1,25,26-trihydroxyvitaminD3	Sterol_Lipids	-10.7	-10.6
610	ZINC000022034381	Lidoflazine	World_NOT_FDA	-10.7	-10.6
611	CID_163331	Prasteroneenanthate	Agonists-Antagonists	-10.7	-10.6
612	ZINC000001481831	Sitaxentan	World_NOT_FDA	-10.7	-10.6
613	ZINC000014712185	Sorgolactone	Metab	-10.7	-10.6
614	ZINC000257463480	Sorgolactone	Metab	-10.7	-10.6
615	ZINC000035902489	xalkori	FDA	-10.7	-10.6
616	ZINC000089224316		World_NOT_FDA	-10.7	-10.6
617	ZINC000238750729	6''-O-Acetyldaidzin	Metab	-10.7	-10.5
618	LMST01030134	6alpha-hydroxycampestanol	Erg, Sterols	-10.7	-10.4
619	ZINC000002383231	benzofenap	Metab	-10.7	-10.4
620	ZINC000000897251	donepezil	FDA	-10.7	-10.4
621	ZINC000001532105	flumiclorac-pentyl	Metab	-10.7	-10.4
622	ChEBI_5852	Ibogaine	Agonists-Antagonists	-10.7	-10.4
623	ZINC000003831462	Sofalcone	World_NOT_FDA	-10.7	-10.4
624	ZINC000306121574		Metab	-10.7	-10.4
625	LMST02030195	21-Deoxycortisol	Steroids, Estrogens, Sterol_Lipids	-10.7	-10.3
626	ZINC000003814422	android	FDA	-10.7	-10.3
627	ZINC000014819484	corylin	Metab	-10.7	-10.2
628	ZINC000002032615	nix	FDA	-10.7	-10.2
629	ZINC000000607986		FDA	-10.7	-10.2
630	ZINC000116473771		FDA	-10.7	-10.2
631	LMST03020600	(23R)-1alpha-hydroxy-25,27-didehydrovitaminD326,23-lactone	Sterol_Lipids	-10.6	-12.9
632	LMST03020118	(23S,25S)-25-hydroxyvitaminD326,23-lactone/(23S,25S)-25-hydroxycholecalciferol26,23-lactone	Sterol_Lipids	-10.6	-12.6
633	LMST01010206	5alpha-cholesta-7,24-dien-3beta-ol	Chol, Sterols	-10.6	-12.1
634	LMST04030255	7alpha-hydroxy-3-oxo-4-cholestenoicacid	Sterol_Lipids	-10.6	-12.1
635	LMST01010363	5alpha-cholesta-7,24-dien-3beta-ol -d6	Chol, Sterols	-10.6	-12
636	LMST01110004	(23R)-isocalysterol	Sterols	-10.6	-12
637	ZINC000036387179	11-deoxycorticosteronepivalate	World_NOT_FDA	-10.6	-12
638	LMST01010253	cholesta-6,8(14)-dien-3beta,5alpha-diol	Chol, Sterols	-10.6	-11.9
639	LMST01060004	4alpha-Methyl-23-methylene-cholest-5-en-3beta-ol	Sterols	-10.6	-11.9
640	LMST04010364	3,7,12-Trioxochol-5-en-24-oic Acid	Sterol_Lipids	-10.6	-11.9
641	LMST01040249	beta-Sitostenone	Sterols	-10.6	-11.9
642	LMST01010099	5alpha-cholest-22E-en-3beta-ol	Chol, Sterols	-10.6	-11.8
643	LMST01010281	3beta-methoxycholest-5-ene	Chol, Sterols	-10.6	-11.8
644	ZINC000000704422	(3'alpha,5'alpha,9'xi,10'beta)-O-(3-Hydroxy-7-drimen-11-yl)umbelliferone	Metab	-10.6	-11.8
645	ZINC000001445635	(3'alpha,5'alpha,9'xi,10'beta)-O-(3-Hydroxy-7-drimen-11-yl)umbelliferone	Metab	-10.6	-11.8
646	ZINC000013485697	(3'x,5'a,9'x,10'b)-O-(3-Hydroxy-6-oxo-7-drimen-11-yl)umbelliferone	Metab	-10.6	-11.8
647	ZINC000144006246	(3'x,5'a,9'x,10'b)-O-(3-Hydroxy-6-oxo-7-drimen-11-yl)umbelliferone	Metab	-10.6	-11.8
648	ZINC000238777009	(3'x,5'a,9'x,10'b)-O-(3-Hydroxy-6-oxo-7-drimen-11-yl)umbelliferone	Metab	-10.6	-11.8
649	LMST01010353	1,4-cholestadienone	Chol, Sterols	-10.6	-11.8
650	LMST03020202	22-fluorovitaminD3/22-fluorocholecalciferol	Sterol_Lipids	-10.6	-11.8
651	LMST04030225	3beta-OH-Delta7-dafachronicacid	DeltaL, Sterol_Lipids	-10.6	-11.8
652	ZINC000030729723	campest-4-en-3-one	Metab	-10.6	-11.8
653	ZINC000004491418	conferol	Metab	-10.6	-11.8
654	LMST01010239	5alpha-cholest-8-en-3-one	Chol, Sterols	-10.6	-11.7
655	LMST01010252	5alpha,9alpha-epidioxy-8,14alpha-epoxy-cholest-6-en-3beta-ol	Chol, Sterols	-10.6	-11.7
656	LMST03020110	(23Z)-1alpha,25-dihydroxy-16,17,23,24-tetradehydrovitaminD3/(23Z)-1alpha,25-dihydroxy-16,17,23,24-tetradehydrocholecalciferol	Sterol_Lipids	-10.6	-11.7
657	ZINC000000704423	(3'alpha,5'alpha,9'xi,10'beta)-O-(3-Hydroxy-7-drimen-11-yl)umbelliferone	Metab	-10.6	-11.7
658	ZINC000004491419	(3'alpha,5'alpha,9'xi,10'beta)-O-(3-Hydroxy-7-drimen-11-yl)umbelliferone	Metab	-10.6	-11.7
659	LMST01010144	22R-hydroxycholesterol(d7)	Chol, Sterols	-10.6	-11.7
660	LMST01010354	4beta-OH-7-DHC	Chol, Sterols	-10.6	-11.7
661	LMST01040139	14alpha-methyl-poriferast-9(11)-en-3beta-ol	Sterols	-10.6	-11.6
662	LMST04010361	7,12-Dioxochol-5-en-24-oic Acid	Sterol_Lipids	-10.6	-11.6
663	ZINC000256427287	Clerosterol	Metab	-10.6	-11.6
664	LMST03010001	VitaminD2	Sterol_Lipids	-10.6	-11.6
665	LMST01010412	23R-methoxycholest-5,24-dien-3beta-ol	Chol, Sterols	-10.6	-11.5
666	LMST03020130	(20S,24S)-20-fluoro-1alpha,24-dihydroxy-26,27-cyclovitaminD3/(20S,24S)-20-fluoro-1alpha,24-dihydroxy-26,27-cyclocholecalciferol	Sterol_Lipids	-10.6	-11.5
667	LMST01010202	4alpha-methylzymosterol	Chol, Sterols	-10.6	-11.5
668	ZINC000257536029	7-dehydrodesmosterol	Metab	-10.6	-11.5
669	ZINC000053073961	Antrafenine	World_NOT_FDA	-10.6	-11.5
670	LMST01040260	leucisterol	Sterols	-10.6	-11.5
671	ZINC000001542146	Pranlukast	World_NOT_FDA	-10.6	-11.5
672	ZINC000008234384		World_NOT_FDA	-10.6	-11.5
673	LMST01031052	(22E,24R)-24,26-dimethylcholesta-5,22,25(27)-trien-3beta-ol	Erg, Sterols	-10.6	-11.4
674	LMST01100010	(24R)-24-methylcycloart-25-en-3beta-ol	Sterols	-10.6	-11.4
675	LMST01031026	ergosta-5,8,22E-trien-3beta-ol	Erg, Sterols	-10.6	-11.3
676	LMST01150011	25-iso-etioline	Sterols	-10.6	-11.3
677	LMST01030094	5-dihydroergosterol	Erg, Sterols	-10.6	-11.3
678	LMST03020234	(5E)-1alpha-hydroxy-3-epivitaminD3/(5E)-1alpha-hydroxy-3-epicholecalciferol	Sterol_Lipids	-10.6	-11.2
679	LMST01031091	29-demethylgeodisterol-O-sulfite	Erg, Sterols	-10.6	-11.2
680	LMST01040271	Saringosterone	Sterols	-10.6	-11.2
681	LMST01010171	zymosterolintermediate1b	Chol, Sterols	-10.6	-11.2
682	LMST04010429	3-Oxochola-1,4,6-trien-24-oic Acid	Sterol_Lipids	-10.6	-11.1
683	LMST01031038	Isoxestospongesterol	Erg, Sterols	-10.6	-11.1
684	ZINC000013831130	raltegravir	FDA	-10.6	-11.1
685	LMST03020241	1alpha,25-dihydroxy-3-deoxyvitaminD3/1alpha,25-dihydroxy-3-deoxycholecalciferol	Sterol_Lipids	-10.6	-11
686	LMST03030004	22-HydroxyVitaminD4	Sterol_Lipids	-10.6	-11
687	LMST01040195	22S-hydroxysitosterol	Sterols	-10.6	-11
688	LMST01031047	23-methylene-24-methylcholestanol	Erg, Sterols	-10.6	-11
689	LMST03020239	2alpha-hydroxyvitaminD3/2alpha-hydroxycholecalciferol	Sterol_Lipids	-10.6	-11
690	ZINC000040164488	5-alpha-Dihydrotestosteroneglucuronide	Metab, World_NOT_FDA	-10.6	-11
691	LMST05010041	5-alpha-Dihydrotestosteroneglucuronide	Steroids, Androgens, Sterol_Lipids	-10.6	-10.9
692	LMST03010042	5(E)-1alpha,25-dihydroxyvitaminD2/5(E)-1alpha,25-dihydroxyergocalciferol	Sterol_Lipids	-10.6	-10.9
693	LMST02030225	HDOPA	Steroids, Estrogens, Sterol_Lipids	-10.6	-10.9
694	LMST01030143	4alpha,24beta-Dimethyl-5alpha-cholest-22-en-3beta-4beta-diol	Erg, Sterols	-10.6	-10.8
695	LMST02020107	Mesterolone	Steroids, Androgens, Sterol_Lipids	-10.6	-10.8
696	ZINC000004217252	Penfluridol	World_NOT_FDA	-10.6	-10.8
697	LMST04010245	12alpha-Hydroxy-3-oxochola-4,6-dien-24-oic Acid	Sterol_Lipids	-10.6	-10.7
698	ZINC000095619120	3-Trans-HydroxycyclohexylGlyburide	World_NOT_FDA	-10.6	-10.7
699	ZINC000100005073	indigocarmine	Metab, World_NOT_FDA	-10.6	-10.7
700	ZINC000257463481	Sorgolactone	Metab	-10.6	-10.7
701	ZINC000002585906	1-phenyl-4-(1-phenylethyl)tetralin	Metab	-10.6	-10.6
702	ZINC000065742834	5-Hydroxybuspirone	World_NOT_FDA	-10.6	-10.6
703	ZINC000013449462	5-O-Desmethyldonepezil	Metab, World_NOT_FDA	-10.6	-10.6
704	ZINC000001916008	d-tocotrienol	Metab	-10.6	-10.6
705	LMST03020018	(5E)-(22S)-22-hydroxy-24,25,26,27-tetranorvitaminD3/(5E)-(22S)-22-hydroxy-24,25,26,27-tetranorcholecalciferol	Sterol_Lipids	-10.6	-10.5
706	LMST03020566	1alpha,25-dihydroxy-3-deoxy-19-nor-22-oxavitaminD3/1alpha,25-dihydroxy-3-deoxy-19-nor-22-oxacholecalciferol	Sterol_Lipids	-10.6	-10.5
707	LMST01150012	22-iso-teinemine	Sterols	-10.6	-10.5
708	ZINC000013328774	6-o-acetyldaidzin	Metab	-10.6	-10.5
709	ZINC000014454692	D6-Ambrettolide	Metab	-10.6	-10.5
710	LMST01010210	Ecdysone	Chol, Sterols	-10.6	-10.5
711	LMST02020051	Epitestosterone	Steroids, Androgens, Sterol_Lipids	-10.6	-10.5
712	LMST01150008	Etioline	Sterols	-10.6	-10.5
713	ZINC000014763011	gancaoninb	Metab	-10.6	-10.5
714	ZINC000031417974	KetoprofenGlucuronide	Metab, World_NOT_FDA	-10.6	-10.5
715	ZINC000053683345	caprelsa	FDA	-10.6	-10.4
716	ZINC000014883354	dihydrophylloquinone	Metab	-10.6	-10.4
717	ChEBI_53289	Donepezil	Agonists-Antagonists	-10.6	-10.4
718	LMST01150009	Leptinidine	Sterols	-10.6	-10.4
719	ZINC000005158610	2',4',5,7-tetrahydroxy-5'-geranylflavanone	Metab	-10.6	-10.3
720	ZINC000257782821	6''-O-Acetyldaidzin	Metab	-10.6	-10.3
721	ZINC000003871889	Carindacillin	World_NOT_FDA	-10.6	-10.3
722	ZINC000000518998	isoglabranin	Metab	-10.6	-10.3
723	ZINC000000490791	Testosterone	World_NOT_FDA	-10.6	-10.3
724	ZINC000005751264	25-hydroxycholesterol	Metab	-10.6	-10.2
725	ZINC000000712672	7,11,12-triacetoxycoumestan	Metab	-10.6	-10.2
726	ZINC000036375370	daidzein4'-o-glucuronide	Metab	-10.6	-10.2
727	ZINC000004098264	Fumagillin	World_NOT_FDA	-10.6	-10.2
728	ZINC000013831791	Ptc124	World_NOT_FDA	-10.6	-10.2
729	LMST05010012	Testosteroneglucuronide	Steroids, Androgens, Sterol_Lipids	-10.6	-10.2
730	ZINC000003831004		World_NOT_FDA	-10.6	-10.2
731	LMST01010237	3-keto-4alpha-methyl-zymosterol	Chol, Sterols	-10.5	-12.4
732	LMST03020077	26,26,26,27,27,27-hexafluoro-25-hydroxy-16,17,23,23,24,24-hexadehydrovitaminD3/26,26,26,27,27,27-hexafluoro-25-hydroxy-16,17,23,23,24,24-hexadehydrocholecalciferol	Sterol_Lipids	-10.5	-12.3
733	LMST01010121	7-dehydro-desmosterol	Chol, Sterols	-10.5	-12.3
734	LMST01060002	gorgostan-3β-ol	Sterols	-10.5	-12.3
735	LMST01010016	Desmosterol	Chol, Sterols	-10.5	-12.1
736	LMST01010090	Desmosterol(d6)	Chol, Sterols	-10.5	-12.1
737	LMST01130013	11alpha,19-dihydroxytelocinobufagin	Sterols	-10.5	-12
738	LMST01030140	14-nor-lanosta-5-en-3beta-ol	Erg, Sterols	-10.5	-11.9
739	LMST01031106	24-methylene-cholest-5-en-3beta,23S-diol	Erg, Sterols	-10.5	-11.9
740	LMST01130012	19-hydroxytelocinobufagin	Sterols	-10.5	-11.9
741	LMST01010256	5,6alpha-epoxy-cholest-8(14)-en-3beta,7beta-diol	Chol, Sterols	-10.5	-11.8
742	LMST03020619	3-Deoxy-25-hydroxyvitaminD3	Sterol_Lipids	-10.5	-11.8
743	LMST04030224	3alpha-OH-Delta7-dafachronicacid	DeltaL, Sterol_Lipids	-10.5	-11.8
744	ZINC000257536027	7-dehydrodesmosterol	Metab	-10.5	-11.8
745	LMST05020016	cholesterolsulfate	Sterol_Lipids	-10.5	-11.8
746	ZINC000000704424	feselol	Metab	-10.5	-11.8
747	LMST04030257	7alpha,24R-Dihydroxy-3-oxocholest-4-en-(25R)26-oic acid	Sterol_Lipids	-10.5	-11.7
748	ZINC000004731235	(3'alpha,5'alpha,9'xi,10'beta)-O-(3-Hydroxy-7-drimen-11-yl)umbelliferone	Metab	-10.5	-11.7
749	LMST01010001	Cholesterol	Chol, Sterols	-10.5	-11.7
750	LMST01010093	Cholesterol(d7)	Chol, Sterols	-10.5	-11.7
751	LMST03020036	(17Z)-1alpha,25-dihydroxy-17,20-didehydro-21-norvitaminD3/(17Z)-1alpha,25-dihydroxy-17,20-didehydro-21-norcholecalciferol	Sterol_Lipids	-10.5	-11.6
752	LMST03020092	(22E)-1alpha-hydroxy-24-oxo-26,27-cyclo-22,23-didehydrovitaminD3/(22E)-1alpha-hydroxy-24-oxo-26,27-cyclo-22,23-didehydrocholecalciferol	Sterol_Lipids	-10.5	-11.6
753	LMST03020311	1alpha-hydroxy-22-(4-hydroxyphenyl)-23,24,25,26,27-pentanorvitaminD3/1alpha-hydroxy-22-(4-hydroxyphenyl)-23,24,25,26,27-pentanorcholecalciferol	Sterol_Lipids	-10.5	-11.6
754	LMST04010318	(20S,22E)-3beta-Hydroxychola-5,16,22-trien-24-oic Acid	Sterol_Lipids	-10.5	-11.5
755	LMST01010176	14-demethyllanosterol	Chol, Sterols	-10.5	-11.5
756	LMST01010387	22-oxocholesterol	Chol, Sterols	-10.5	-11.5
757	LMST01010019	24S-hydroxy-cholesterol	Chol, Sterols	-10.5	-11.5
758	LMST03020197	6-fluorovitaminD3/6-fluorocholecalciferol	Sterol_Lipids	-10.5	-11.5
759	LMST05010013	Androsterone3-glucuronide	Steroids, Androgens, Sterol_Lipids	-10.5	-11.5
760	LMST03020153	1alpha-hydroxy-24,25-didehydrovitaminD3/1alpha-hydroxy-24,25-didehydrocholecalciferol	Sterol_Lipids	-10.5	-11.4
761	LMST04010128	3-Oxo-5alpha-cholan-24-oic Acid	Sterol_Lipids	-10.5	-11.3
762	LMST03020334	(10E)-19-methylvitaminD3/(10E)-19-methylcholecalciferol	Sterol_Lipids	-10.5	-11.3
763	LMST03020106	(22E)-(24S)-1alpha,24-dihydroxy-26,27-cyclo-22,23-didehydrovitaminD3/(22E)-(24S)-1alpha,24-dihydroxy-26,27-cyclo-22,23-didehydrocholecalciferol/Calcipotriol	Sterol_Lipids	-10.5	-11.3
764	LMST03020342	(22R)-25-hydroxy-22-methoxyvitaminD3/(22R)-25-hydroxy-22-methoxycholecalciferol	Sterol_Lipids	-10.5	-11.3
765	LMST01030114	24-epibrassicasterol	Erg, Sterols	-10.5	-11.3
766	LMST03020664	25-DehydrovitaminD3	Sterol_Lipids	-10.5	-11.3
767	LMST01031040	25-methylxestosterol	Erg, Sterols	-10.5	-11.3
768	ZINC000257416693	5alpha-Cholest-7-en-3-one	Metab	-10.5	-11.3
769	LMST01030107	4alpha,14alpha-dimethyl-24-methylene-cholest-7,9(11)-dien-3beta-ol	Erg, Sterols	-10.5	-11.2
770	LMST03020209	1alpha-fluoro-25-hydrovitaminD3/1alpha-fluoro-25-hydrocholecalciferol	Sterol_Lipids	-10.5	-11.2
771	LMST03020159	1alpha-hydroxy-22-oxovitaminD3/1alpha-hydroxy-22-oxocholecalciferol	Sterol_Lipids	-10.5	-11.2
772	LMST01040171	24R-Ethyl-26,26,27-trimethyl-3beta-hydroxycholesta-7,26-(30)-diene	Sterols	-10.5	-11.2
773	LMST03020040	25-hydroxy-3-deoxy-2-oxavitaminD3/25-hydroxy-3-deoxy-2-oxacholecalciferol	Sterol_Lipids	-10.5	-11.2
774	ZINC000004099144	delta8,14-Sterol	Metab	-10.5	-11.2
775	ZINC000005854568	kanzonolh	Metab	-10.5	-11.2
776	LMST01010324	3beta-hydroxy-5alpha-cholest-8(9),14(15)-dien-23-one	Chol, Sterols	-10.5	-11.1
777	LMST03020149	(22E)-1beta-hydroxy-22,23-didehydrovitaminD3/(22E)-1beta-hydroxy-22,23-didehydrocholecalciferol	Sterol_Lipids	-10.5	-11.1
778	LMST03020215	(5E,10E)-19-fluoro-1alpha,25-dihydroxyvitaminD3/(5E,10E)-19-fluoro-1alpha,25-dihydroxycholecalciferol	Sterol_Lipids	-10.5	-11.1
779	LMST03020051	(5Z)-1alpha,25-dihydroxy-3-deoxy-3-thiavitaminD33-oxide/(5Z)-1alpha,25-dihydroxy-3-deoxy-3-thiacholecalciferol3-oxide	Sterol_Lipids	-10.5	-11.1
780	LMST01010290	15-dehydro-A-norcholestanol	Chol, Sterols	-10.5	-11.1
781	ZINC000095618410	beta-Sitostenone	Metab	-10.5	-11.1
782	ZINC000004428527	Desoxycortone	World_NOT_FDA	-10.5	-11.1
783	LMST01031032	Verongulasterol	Erg, Sterols	-10.5	-11.1
784	LMST01031062	5alpha,6beta-dihydroxy-24-methylenecholestan-3-one	Erg, Sterols	-10.5	-11
785	LMST01040178	4alpha-methyl-5alpha-poriferastan-3beta-ol	Sterols	-10.5	-11
786	LMST04010287	(22E)-3beta-Hydroxy-5alpha-chola-7,22-dien-24-oic Acid	Sterol_Lipids	-10.5	-11
787	LMST03020128	(20S,24R)-20-fluoro-1alpha,24-dihydroxy-26,27-cyclovitaminD3/(20S,24R)-20-fluoro-1alpha,24-dihydroxy-26,27-cyclocholecalciferol	Sterol_Lipids	-10.5	-11
788	LMST01031075	(20S,24S)-ThornasterolB	Erg, Sterols	-10.5	-11
789	LMST01010180	2-dehydroecdysone	Chol, Sterols	-10.5	-11
790	ZINC000077269415	AbirateroneSulfate	World_NOT_FDA	-10.5	-11
791	LMST01040189	NorselicacidA	Sterols	-10.5	-11
792	LMST01040161	Strongylosterol	Sterols	-10.5	-11
793	LMST04010139	3,12-Dioxo-5alpha-cholan-24-oic Acid	Sterol_Lipids	-10.5	-10.9
794	LMST04010141	7,12-Dioxo-5alpha-cholan-24-oic Acid	Sterol_Lipids	-10.5	-10.9
795	LMST03020199	(10E)-19-fluorovitaminD3/(10E)-19-fluorocholecalciferol	Sterol_Lipids	-10.5	-10.9
796	LMST03020198	(10Z)-19-fluorovitaminD3/(10Z)-19-fluorocholecalciferol	Sterol_Lipids	-10.5	-10.9
797	LMST01031076	(20S,24R)-ThornasterolB	Erg, Sterols	-10.5	-10.9
798	LMST03020261	1alpha,25-dihydroxy-14-epiprevitaminD3/1alpha,25-dihydroxy-14-epiprecholecalciferol	Sterol_Lipids	-10.5	-10.9
799	LMST01040242	24-Ethyllophenol	Sterols	-10.5	-10.9
800	ZINC000256078660	3-Hydroxystigmast-5-en-7-one	Metab	-10.5	-10.9
801	ZINC000011617039	pazopanib	FDA	-10.5	-10.9
802	ZINC000256434206	(6beta,24R)-6-Hydroxystigmast-4-en-3-one	Metab	-10.5	-10.8
803	LMST03020044	1alpha-hydroxy-22-oxavitaminD3/1alpha-hydroxy-22-oxacholecalciferol	Sterol_Lipids	-10.5	-10.8
804	LMST03010044	1beta,25-dihydroxyvitaminD2/1beta,25-dihydroxyergocalciferol	Sterol_Lipids	-10.5	-10.8
805	LMST05020022	3b,16a-Dihydroxyandrostenonesulfate	Sterol_Lipids	-10.5	-10.8
806	ZINC000040164545	5-Dehydroepisterol	Metab	-10.5	-10.8
807	LMST01110016	Aragusteroketal	Sterols	-10.5	-10.8
808	LMST01010347	Dihydromarthasterone	Chol, Sterols	-10.5	-10.8
809	ZINC000013542524	glycoursodeoxycholate	Metab	-10.5	-10.8
810	ZINC000095620638	1,2,3,4-Tetrahydro-1-phenyl-4-(1-phenylethyl)naphthalene	Metab	-10.5	-10.7
811	ZINC000253497581	beta-Sitosterolacetate	Metab	-10.5	-10.7
812	ZINC000256427300	Clerosterol	Metab	-10.5	-10.7
813	ZINC000005497532	Methenolone	World_NOT_FDA	-10.5	-10.7
814	LMST03020281	(6R)-6,19-epidioxy-25-hydroxy-6,19-dihydrovitaminD3/(6R)-6,19-epidioxy-25-hydroxy-6,19-dihydrocholecalciferol	Sterol_Lipids	-10.5	-10.6
815	LMST03020074	1alpha,25-dihydroxy-19-norvitaminD3/1alpha,25-dihydroxy-19-norcholecalciferol	Sterol_Lipids	-10.5	-10.6
816	LMST01030133	6-oxocampestanol	Erg, Sterols	-10.5	-10.6
817	LMST01040152	ajugalactone	Sterols	-10.5	-10.6
818	ZINC000043100810	Delamanid	World_NOT_FDA	-10.5	-10.6
819	LMST02020028	Methenolone	Steroids, Androgens, Sterol_Lipids	-10.5	-10.6
820	ZINC000000643153	nizoral	FDA	-10.5	-10.6
821	LMST02020075	Testosteroneenanthate	Steroids, Androgens, Sterol_Lipids	-10.5	-10.6
822	LMST03020569	25-dihydroxy-19-nor-22-oxavitaminD3/25-dihydroxy-19-nor-22-oxacholecalciferol	Sterol_Lipids	-10.5	-10.5
823	LMST01050007	29-methylisofucosterol	Sterols	-10.5	-10.5
824	ZINC000001530571	buspirone	FDA	-10.5	-10.5
825	ZINC000003831330	k-ject	Metab, World_NOT_FDA	-10.5	-10.5
826	LMST01031039	Xestospongesterol	Erg, Sterols	-10.5	-10.5
827	ZINC000003875469		World_NOT_FDA	-10.5	-10.5
828	LMST03020568	25-dihydroxy-19-nor-22-oxa-3-epivitaminD3/25-dihydroxy-19-nor-22-oxa-3-epicholecalciferol	Sterol_Lipids	-10.5	-10.4
829	LMST02020019	4-Chlorotestosterone	Steroids, Androgens, Sterol_Lipids	-10.5	-10.4
830	ZINC000004654839	demethylphylloquinone	Metab	-10.5	-10.4
831	ZINC000003831332	k-ject	Metab, FDA	-10.5	-10.4
832	ZINC000008551808		Metab	-10.5	-10.4
833	LMST02030145	Aldosteronehemiacetal	Steroids, Estrogens, Sterol_Lipids	-10.5	-10.3
834	ZINC000000000928	Amlexanox	World_NOT_FDA	-10.5	-10.3
835	ZINC000001542929	Lofepramine	World_NOT_FDA	-10.5	-10.3
836	ZINC000001850377	nix	FDA	-10.5	-10.3
837	LMST02020076	Testosteronepropionate	Steroids, Androgens, Sterol_Lipids	-10.5	-10.3
838	ZINC000090614856		Metab	-10.5	-10.3
839	ZINC000021981272	Hydroxynefazodone	World_NOT_FDA	-10.5	-10.2
840	ZINC000014642871	icosylpalmitate	Metab	-10.5	-10.2
841	ZINC000003831329	k-ject	Metab, World_NOT_FDA	-10.5	-10.2
842	ZINC000003831331	k-ject	Metab, World_NOT_FDA	-10.5	-10.2
843	ZINC000014824074	na-p-hydroxycoumaroyltryptophan	Metab	-10.5	-10.2
844	ZINC000013374706		Metab	-10.5	-10.2
845	ZINC000013544887		Metab	-10.5	-10.2
846	LMST01040144	24-ethylideneIophenol	Sterols	-10.4	-12.3
847	ZINC000248267900	beta-Sitosterolacetate	Metab	-10.4	-12.1
848	LMST01010200	(20R,22R)-20,22-dihydroxycholesterol	Chol, Sterols	-10.4	-12
849	LMST03020335	(5E,10E)-19-methylvitaminD3/(5E,10E)-19-methylcholecalciferol	Sterol_Lipids	-10.4	-12
850	LMST01130021	1beta-hydroxybufalin	Sterols	-10.4	-12
851	LMST01040196	22S-hydroxyisofucosterol	Sterols	-10.4	-12
852	LMST03020244	(24R)-24-hydroxyvitaminD3/(24R)-24-hydroxycholecalciferol	Sterol_Lipids	-10.4	-11.9
853	LMST03020155	25-hydroxy-16,17-didehydrovitaminD3/25-hydroxy-16,17-didehydrocholecalciferol	Sterol_Lipids	-10.4	-11.9
854	ZINC000253497580	beta-Sitosterolacetate	Metab	-10.4	-11.9
855	LMST04030219	(25S)-dafachronicacid	Sterol_Lipids	-10.4	-11.8
856	LMST03010018	(5Z)-isovitaminD2/5,6-cis-isovitaminD2/(5Z)-isoergocalciferol/5,6-cis-isoergocalciferol	Sterol_Lipids	-10.4	-11.8
857	LMST01060007	23-demethylgorgosterol	Sterols	-10.4	-11.8
858	LMST01031177	25-hydroxy-ergosta-4,6,8(14),22E-tetraen-3-one	Erg, Sterols	-10.4	-11.8
859	ZINC000003875993	Quinestrol	World_NOT_FDA	-10.4	-11.8
860	LMST01010141	Lanosta-7,9(11)-dien-3eta-ol	Chol, Sterols	-10.4	-11.7
861	LMST01010164	(24R)-24-hydroxycholesterol	Chol, Sterols	-10.4	-11.7
862	LMST03020665	24-DehydroprevitaminD3	Sterol_Lipids	-10.4	-11.7
863	LMST01010092	24-hydroxy-cholesterol(d6)	Chol, Sterols	-10.4	-11.7
864	LMST03020091	25-hydroxy-16,17,23,23,24,24-hexadehydrovitaminD3/25-hydroxy-16,17,23,23,24,24-hexadehydrocholecalciferol	Sterol_Lipids	-10.4	-11.7
865	LMST03020100	25-hydroxy-16,17,23,24-tetradehydrovitaminD3/25-hydroxy-16,17,23,24-tetradehydrocholecalciferol	Sterol_Lipids	-10.4	-11.7
866	LMST03020131	26,26,26-trifluoro-25-hydroxyvitaminD3	Sterol_Lipids	-10.4	-11.7
867	LMST01010445	3beta,4beta-dihydroxycholest-7(8)-en-23-one	Chol, Sterols	-10.4	-11.7
868	LMST01010444	3beta,4beta-dihydroxycholesta-5-ene-23-one	Chol, Sterols	-10.4	-11.7
869	LMST01010014	4beta-hydroxy-cholesterol	Chol, Sterols	-10.4	-11.7
870	LMST01010003	4beta-hydroxy-cholesterol(d7)	Chol, Sterols	-10.4	-11.7
871	LMST01031055	Remeisterol	Erg, Sterols	-10.4	-11.7
872	LMST03020245	(24S)-24-hydroxyvitaminD3/(24S)-24-hydroxycholecalciferol	Sterol_Lipids	-10.4	-11.6
873	LMST01031161	3beta,4beta-dihydroxyergosta-23-one	Erg, Sterols	-10.4	-11.6
874	LMST01010089	Lathosterol	Chol, Sterols	-10.4	-11.6
875	ZINC000014946303	cellulosetriacetate	Metab	-10.4	-11.5
876	LMST01010140	4alpha-methyl-5beta-cholestan-3beta-ol	Chol, Sterols	-10.4	-11.4
877	LMST03020319	25-hydroxy-24-methyl-23,24-didehydrovitaminD3/25-hydroxy-24-methyl-23,24-didehydrocholecalciferol	Sterol_Lipids	-10.4	-11.4
878	LMST01050017	25-Methyl-24-isopropenyl-cholesterol	Sterols	-10.4	-11.4
879	LMST01031014	5alpha-ergosta-7,22-diene-3beta,5-diol	Erg, Sterols	-10.4	-11.4
880	LMST04030247	7alpha,12alpha,24,25-Tetrahydroxycholest-4-en-3-one	Sterol_Lipids	-10.4	-11.4
881	LMST01010047	7beta-hydroxycholesterol	Chol, Sterols	-10.4	-11.4
882	LMST01100008	cycloartenol	Sterols	-10.4	-11.4
883	ZINC000004027519	nevskin	Metab	-10.4	-11.4
884	LMST01080007	Sarsasapogenenin	Sterols	-10.4	-11.3
885	ZINC000000897618	Silandrin	Metab	-10.4	-11.3
886	LMST03020129	(20R,24S)-20-fluoro-1alpha,24-dihydroxy-26,27-cyclovitaminD3/(20R,24S)-20-fluoro-1alpha,24-dihydroxy-26,27-cyclocholecalciferol	Sterol_Lipids	-10.4	-11.2
887	LMST03020150	(22Z)-1alpha-hydroxy-22,23-didehydrovitaminD3/(22Z)-1alpha-hydroxy-22,23-didehydrocholecalciferol	Sterol_Lipids	-10.4	-11.2
888	LMST03020562	1alpha,25-dihydroxy-3-deoxy-19-norvitaminD3/1alpha,25-dihydroxy-3-deoxy-19-norcholecalciferol	Sterol_Lipids	-10.4	-11.2
889	LMST01010148	24,25-epoxy-cholesterol(d6)	Chol, Sterols	-10.4	-11.2
890	LMST01030120	6-deoxoteasterone	Erg, Sterols	-10.4	-11.2
891	LMST01040156	Baikalosterol	Sterols	-10.4	-11.2
892	ZINC000034944431	silandrin	Metab	-10.4	-11.2
893	LMST01040123	Stigmasterol	Sterols	-10.4	-11.2
894	LMST03020654	VitaminD3butyrate	Sterol_Lipids	-10.4	-11.2
895	LMST03020661	1alpha-Hydroxypregnacalciferol	Sterol_Lipids	-10.4	-11.1
896	LMST03010028	1alpha-hydroxyvitaminD2/1alpha-hydroxyergocalciferol	Sterol_Lipids	-10.4	-11.1
897	ZINC000000643138	nizoral	FDA	-10.4	-11.1
898	ZINC000004096710	3b,5a,6b-Cholestanetriol	Metab	-10.4	-11
899	ZINC000100054527	4-Trans-Hydroxyglyburide	World_NOT_FDA	-10.4	-11
900	LMST01010242	8-Dehydrocholesterol	Chol, Sterols	-10.4	-11
901	ZINC000033970417	stigmast-4-en-6beta-ol-3-one	Metab	-10.4	-11
902	LMST04010334	3alpha-Hydroxy-5alpha-chol-6-en-24-oic Acid	Sterol_Lipids	-10.4	-10.9
903	ZINC000002384327	1-phenyl-4-(1-phenylethyl)tetralin	Metab	-10.4	-10.9
904	ZINC000008551674	17a-Estradiol3-Glucuronide	Metab, World_NOT_FDA	-10.4	-10.9
905	LMST03010031	24-epi-25-hydroxyvitaminD2/24-epi-25-hydroxyergocalciferol	Sterol_Lipids	-10.4	-10.9
906	LMST01050015	24-ethyl-24-methyl-cholesterol	Sterols	-10.4	-10.9
907	LMST03020622	ZK168281	Sterol_Lipids	-10.4	-10.9
908	LMST03020177	(17S,20R)-1alpha,25-dihydroxy-17,20-methano-21-norvitaminD3/(17S,20R)-1alpha,25-dihydroxy-17,20-methano-21-norcholecalciferol	Sterol_Lipids	-10.4	-10.8
909	LMST03020176	(17S,20S)-1alpha,25-dihydroxy-17,20-methano-21-norvitaminD3/(17S,20S)-1alpha,25-dihydroxy-17,20-methano-21-norcholecalciferol	Sterol_Lipids	-10.4	-10.8
910	LMST03020583	(20S)-20-cyclopropyl-1alpha,25-dihydroxy-16,17-didehydro-21-norvitaminD3/(20S)-20-cyclopropyl-1alpha,25-dihydroxy-16,17-didehydro-21-norcholecalciferol	Sterol_Lipids	-10.4	-10.8
911	ZINC000253497582	beta-Sitosterolacetate	Metab	-10.4	-10.8
912	LMST01010306	Echissaposterol	Chol, Sterols	-10.4	-10.8
913	ZINC000000896560	granisetron	FDA	-10.4	-10.8
914	LMST03010038	(7E,22E)-(3S,6R)-6-hydroperoxy-9,10-seco-4,7,10(19),22-ergostatetraen-3-ol	Sterol_Lipids	-10.4	-10.7
915	LMST04030125	12alpha-Hydroxy-5beta-cholestan-3-one	Sterol_Lipids	-10.4	-10.7
916	LMST03020056	(24R)-1alpha,24-dihydroxy-22-oxavitaminD3/(24R)-1alpha,24-dihydroxy-22-oxacholecalciferol	Sterol_Lipids	-10.4	-10.7
917	LMST01010172	3-dehydroecdysone	Chol, Sterols	-10.4	-10.7
918	LMST03020655	5,6-trans-25-HydroxyvitaminD3	Sterol_Lipids	-10.4	-10.7
919	LMST03010046	5(E)-1beta,25-dihydroxyvitaminD2/1beta,25-dihydroxyergocalciferol	Sterol_Lipids	-10.4	-10.7
920	LMST03020605	calicoferolA	Sterol_Lipids	-10.4	-10.7
921	LMST05020023	Chenodeoxycholicacid3-sulfate	Sterol_Lipids	-10.4	-10.7
922	LMST01030146	4alpha,24-Dimethyl-5alpha-cholestan-3beta-ol	Erg, Sterols	-10.4	-10.6
923	LMST04010169	12alpha-Hydroxy-3-oxo-5alpha-cholan-24-oic Acid	Sterol_Lipids	-10.4	-10.6
924	LMST02030169	(20S)-20-hydroxypregn-4-en-3-one	Steroids, Estrogens, Sterol_Lipids	-10.4	-10.6
925	CID_125328	L-687,384	Agonists-Antagonists	-10.4	-10.6
926	LMST03020126	(5E)-(24R)-24,25-dihydroxy-[6,19,19-trideutrio]vitaminD3/(5E)-(24R)-24,25-dihydroxy-[6,19,19-trideutrio]cholecalciferol	Sterol_Lipids	-10.4	-10.5
927	LMST02030087	11-deoxycorticosterone	Steroids, Estrogens, Sterol_Lipids	-10.4	-10.5
928	ZINC000022060380	6&#39	World_NOT_FDA	-10.4	-10.5
929	ZINC000022060383	6&#39	World_NOT_FDA	-10.4	-10.5
930	ZINC000003831490	azulfidine	FDA	-10.4	-10.5
931	LMST01070000	Furostaneskeleton	Sterols	-10.4	-10.5
932	ZINC000003801163	quinapril	FDA	-10.4	-10.5
933	LMST03020308	toxisterol3R1/6,19-dihydrovitaminD3/6,19-dihydrocholecalciferol	Sterol_Lipids	-10.4	-10.5
934	ZINC000003875311	Zaltoprofen	World_NOT_FDA	-10.4	-10.5
935	LMST02020085	5alpha-androstane-3,17-dione	Steroids, Androgens, Sterol_Lipids	-10.4	-10.4
936	LMST04010385	3alpha-Hydroxy-12-oxo-5alpha-cholan-24-oic Acid	Sterol_Lipids	-10.4	-10.4
937	LMST02030181	20-hydroxy-3-oxopregn-4-en-21-al	Steroids, Estrogens, Sterol_Lipids	-10.4	-10.4
938	LMST01010197	4alpha-methylcholest-8-en-3beta-ol	Chol, Sterols	-10.4	-10.4
939	ZINC000003919580	Formestane	World_NOT_FDA	-10.4	-10.4
940	ZINC000003874199	menatetrenone	Metab	-10.4	-10.4
941	ZINC000014658258	piperochromenoicacid	Metab	-10.4	-10.4
942	LMST01031097	StoloniferoneK	Erg, Sterols	-10.4	-10.4
943	LMST01160051	WithasomniferolD	Sterol_Lipids	-10.4	-10.4
944	ZINC000078938681		Metab	-10.4	-10.4
945	ZINC000014883350	dihydrophylloquinone	Metab	-10.4	-10.3
946	ZINC000004099050	EstradiolGlucuronideSulfate	World_NOT_FDA	-10.4	-10.3
947	ZINC000035328014	ibrutinib	FDA	-10.4	-10.3
948	ZINC000000538065	nefazodone	FDA	-10.4	-10.3
949	ZINC000000608024	Phenothrin	World_NOT_FDA	-10.4	-10.3
950	ZINC000100038546	Trilostane	World_NOT_FDA	-10.4	-10.3
951	ZINC000013911941	zemplar	FDA	-10.4	-10.3
952	ZINC000004083873		Metab	-10.4	-10.3
953	ZINC000013374707		Metab	-10.4	-10.3
954	LMST04030227	7beta-hydroxy-cholestenoicacid	Sterol_Lipids	-10.4	-10.2
955	ZINC000014883346	dihydrophylloquinone	Metab	-10.4	-10.2
956	ZINC000253477262		Metab	-10.4	-10.2
957	ZINC000253477263		Metab	-10.4	-10.2
958	LMST03020140	23,23-difluoro-25-hydroxyvitaminD3/23,23-difluoro-25-hydroxycholecalciferol	Sterol_Lipids	-10.3	-12.5
959	LMST03020115	(23R,25R)-25-hydroxyvitaminD326,23-lactone/(23R,25R)-25-hydroxycholecalciferol26,23-lactone	Sterol_Lipids	-10.3	-12
960	LMST01010272	7-oxo-cholestenone	Chol, Sterols	-10.3	-12
961	LMST01010286	Cystosterol	Chol, Sterols	-10.3	-12
962	LMST01010095	22-dehydrocholesterol	Chol, Sterols	-10.3	-11.9
963	LMST04030239	3beta-hydroxy-7-oxocholest-5-en-(25R)26-oicacid	Sterol_Lipids	-10.3	-11.9
964	LMST04010341	(22E)-3beta-Hydroxychola-5,16,22-trien-24-oic Acid	Sterol_Lipids	-10.3	-11.8
965	LMST04030126	7beta-Hydroxycholest-4-en-3-one	Sterol_Lipids	-10.3	-11.8
966	LMST02010037	Quinestrol	Steroids, Sterol_Lipids	-10.3	-11.8
967	LMST01010138	4alpha-methyl-cholest-5-en-3beta-ol	Chol, Sterols	-10.3	-11.7
968	LMST04010340	(22E)-3beta-Hydroxy-5alpha-chola-16,22-dien-24-oic Acid	Sterol_Lipids	-10.3	-11.7
969	LMST03010010	(24RS)-28,28,28-trifluoro-25-hydroxyvitaminD2	Sterol_Lipids	-10.3	-11.7
970	LMST03020637	1-Fluoro-25-hydroxy-16-ene-23-yne-26,27-hexadeuterovitamin-D3	Sterol_Lipids	-10.3	-11.7
971	LMST03020136	1alpha,25-difluorovitaminD3/1alpha,25-difluorocholecalciferol	Sterol_Lipids	-10.3	-11.7
972	LMST03020663	25-FluorovitaminD3	Sterol_Lipids	-10.3	-11.7
973	LMST03020088	26,26,26,27,27,27-hexafluoro-1alpha,24-dihydroxyvitaminD3/26,26,26,27,27,27-hexafluoro-1alpha,24-dihydroxycholecalciferol	Sterol_Lipids	-10.3	-11.7
974	LMST04030133	3alpha,7alpha,12alpha-trihydroxycholestane	Sterol_Lipids	-10.3	-11.7
975	LMST01010069	7-dehydrocholesterol	Chol, Sterols	-10.3	-11.7
976	LMST01010364	7-dehydrocholesterol-d7	Chol, Sterols	-10.3	-11.7
977	LMST04030072	Cholestenoicacid	Sterol_Lipids	-10.3	-11.7
978	LMST01010402	Pentalinonsterol	Chol, Sterols	-10.3	-11.7
979	ZINC000000601274	Astemizole	World_NOT_FDA	-10.3	-11.6
980	ZINC000001634551	Nevskin	Metab	-10.3	-11.6
981	ZINC000043746983	Nevskin	Metab	-10.3	-11.6
982	LMST03010015	previtaminD2/preergocalciferol	Sterol_Lipids	-10.3	-11.6
983	LMST01010282	22-methylenecholesterol	Chol, Sterols	-10.3	-11.5
984	LMST01031043	Durissimasterol	Erg, Sterols	-10.3	-11.5
985	ZINC000039314945	Nevskin	Metab	-10.3	-11.5
986	ZINC000239432806	Nevskin	Metab	-10.3	-11.5
987	LMST01010447	3beta,4beta-dihydroxycholest-23-one	Chol, Sterols	-10.3	-11.4
988	LMST01031124	6-deoxo-3-dehydroteasterone	Erg, Sterols	-10.3	-11.4
989	LMST01100038	GalaxaurolE	Sterol_Lipids	-10.3	-11.4
990	ZINC000017044426	isosilybin	Metab	-10.3	-11.4
991	ZINC000100038173	Isosilybin	Metab	-10.3	-11.4
992	LMST03020001	VitaminD3	Sterol_Lipids	-10.3	-11.4
993	LMST03020608	1,25-Dihydroxy-24-oxo-16-ene-vitaminD3	Sterol_Lipids	-10.3	-11.3
994	LMST03020170	1alpha,25-dihydroxy-9,11-didehydrovitaminD3/1alpha,25-dihydroxy-9,11-didehydrocholecalciferol	Sterol_Lipids	-10.3	-11.3
995	LMST01010086	22R-hydroxycholesterol	Chol, Sterols	-10.3	-11.3
996	LMST03020078	26,26,26,27,27,27-hexafluoro-1alpha,25-dihydroxy-16,17,23,23,24,24-hexadehydrovitaminD3/26,26,26,27,27,27-hexafluoro-1alpha,25-dihydroxy-16,17,23,23,24,24-hexadehydrocholecalciferol	Sterol_Lipids	-10.3	-11.3
997	LMST03010057	3-epidihydrotachysterol2/(5E)-(10S)-10,19-dihydro-3-epivitaminD2/(5E)-(10S)-10,19-dihydro-3-epiergocalciferol	Sterol_Lipids	-10.3	-11.3
998	LMST01031049	Occelasterol	Erg, Sterols	-10.3	-11.3
999	LMST01040169	3beta-hydroxy-stigmast-5-en-7-one	Sterols	-10.3	-11.2
1000	LMST03020109	(23E)-1alpha,25-dihydroxy-16,17,23,24-tetradehydrovitaminD3/(23E)-1alpha,25-dihydroxy-16,17,23,24-tetradehydrocholecalciferol	Sterol_Lipids	-10.3	-11.2
1001	LMST01010012	24,25-epoxy-cholesterol	Chol, Sterols	-10.3	-11.2
1002	ZINC000012494006	7-ketocholesterol	Metab	-10.3	-11.2
1003	ZINC000118937140	isomangiferolicacid	Metab	-10.3	-11.2
1004	LMST03020652	VitaminD3sulfoconjugate	Sterol_Lipids	-10.3	-11.2
1005	LMST04010320	(20S,22E)-3beta-Hydroxychola-5,22-dien-24-oic Acid	Sterol_Lipids	-10.3	-11.1
1006	LMST03020540	2alpha-methyl-1alpha,25-dihydroxyvitaminD3/2alpha-methyl-1alpha,25-dihydroxycholecalciferol	Sterol_Lipids	-10.3	-11.1
1007	LMST04010002	5alpha-Cholanoicacid	Sterol_Lipids	-10.3	-11.1
1008	ZINC000100060554	cholestenone	Metab	-10.3	-11.1
1009	ZINC000004175569	Domperidone	World_NOT_FDA	-10.3	-11.1
1010	ZINC000004521924	Trans-VitaminD3	Metab, World_NOT_FDA	-10.3	-11.1
1011	LMST04030049	7beta,12alpha-Dihydroxy-3-oxo-5beta-cholestan-26-oic acid	Sterol_Lipids	-10.3	-11
1012	ZINC000256434199	(6beta,24R)-6-Hydroxystigmast-4-en-3-one	Metab	-10.3	-11
1013	LMST02010040	Estradioldipropionate	Steroids, Sterol_Lipids	-10.3	-11
1014	LMST03020237	(5E)-1beta-hydroxyvitaminD3/(5E)-1beta-hydroxycholecalciferol	Sterol_Lipids	-10.3	-10.9
1015	ZINC000011679756	eltrombopag	FDA	-10.3	-10.9
1016	LMST02020044	Stenbolone	Steroids, Androgens, Sterol_Lipids	-10.3	-10.9
1017	LMST01010226	4alpha-Formyl-5alpha-cholesta-8,24-dien-3beta-ol	Chol, Sterols	-10.3	-10.8
1018	LMST01030148	4alpha,23,24-Trimethyl-5alpha-cholestan-3beta-ol	Erg, Sterols	-10.3	-10.8
1019	LMST01031108	24-methylene-cholest-5-en-3beta,17alpha,22S-triol	Erg, Sterols	-10.3	-10.8
1020	LMST02020112	17-hydroxy-androstan-1,3-dione	Steroids, Androgens, Sterol_Lipids	-10.3	-10.8
1021	ZINC000012484965	Alfacalcidol	World_NOT_FDA	-10.3	-10.8
1022	LMST02030183	(20S)-17,20-dihydroxypregn-4-en-3-one	Steroids, Estrogens, Sterol_Lipids	-10.3	-10.7
1023	LMST01040177	24-hydroperoxy-24-vinylcholesterol	Sterols	-10.3	-10.7
1024	LMST03030005	3-epi-5,6-trans-25-HydroxyvitaminD3	Sterol_Lipids	-10.3	-10.7
1025	LMST01040183	TheonellasterolC	Sterols	-10.3	-10.7
1026	ZINC000004282168	tudcabil	Metab	-10.3	-10.7
1027	LMST03020643	VD2728	Sterol_Lipids	-10.3	-10.7
1028	LMST04010133	12-Oxo-5alpha-cholan-24-oic Acid	Sterol_Lipids	-10.3	-10.6
1029	ZINC000003833954	isopregnanolone	Metab	-10.3	-10.6
1030	LMST03020546	1alpha,25-dihydroxy-19-nor-22-oxavitaminD3/1alpha,25-dihydroxy-19-nor-22-oxacholecalciferol	Sterol_Lipids	-10.3	-10.5
1031	LMST03020648	3-epi-vitaminD3	Sterol_Lipids	-10.3	-10.5
1032	ZINC000003881408	DehydroepiandrosteroneAcetate	World_NOT_FDA	-10.3	-10.5
1033	LMST03020295	(5E)-(25R)-1alpha,25,26-trihydroxyvitaminD3/(5E)-(25R)-1alpha,25,26-trihydroxycholecalciferol	Sterol_Lipids	-10.3	-10.4
1034	ZINC000100054519	4-Cis-HydroxycyclohexylGlyburide	World_NOT_FDA	-10.3	-10.4
1035	ZINC000094566093	doxazosin	FDA	-10.3	-10.4
1036	ZINC000000607861	Famprofazon	World_NOT_FDA	-10.3	-10.4
1037	LMST02030127	Lynestrenol	Steroids, Estrogens, Sterol_Lipids	-10.3	-10.4
1038	LMST02020071	7alpha-hydroxyandrost-4-ene-3,17-dione	Steroids, Androgens, Sterol_Lipids	-10.3	-10.3
1039	LMST02020094	5a-Androst-3-en-17-one	Steroids, Androgens, Sterol_Lipids	-10.3	-10.3
1040	LMST02030192	11-Dehydrocorticosterone	Steroids, Estrogens, Sterol_Lipids	-10.3	-10.3
1041	ZINC000015253910	2',4',5,7-tetrahydroxy-5'-geranylflavanone	Metab	-10.3	-10.3
1042	ZINC000070455474	daidzein7-o-glucuronide	Metab	-10.3	-10.3
1043	LMST01010195	ponasteroneA	Chol, Sterols	-10.3	-10.3
1044	ZINC000000538285	Repirinast	World_NOT_FDA	-10.3	-10.3
1045	LMST01010137	4-Methyl-cholest-5-en-3beta-ol	Chol, Sterols	-10.3	-10.2
1046	LMST04010323	(20S)-3beta-Hydroxy-5alpha-cholan-24-oic Acid	Sterol_Lipids	-10.3	-10.2
1047	ZINC000013382496	3-isomangostin	Metab	-10.3	-10.2
1048	ZINC000014642868	icosylpalmitate	Metab	-10.3	-10.2
1049	ZINC000008844372	ononin?	Metab	-10.3	-10.2
1050	LMST02030000	Pregnaneskeleton	Steroids, Estrogens, Sterol_Lipids	-10.3	-10.2
1051	ZINC000000057522	ting	FDA	-10.3	-10.2
1052	LMST01010207	4,4-dimethyl-5alpha-cholest-7-en-3beta-ol	Chol, Sterols	-10.2	-12
1053	LMST01031224	KlyflaccisteroidB	Erg, Sterol_Lipids	-10.2	-12
1054	LMST03010068	SuprasterolII	Sterol_Lipids	-10.2	-12
1055	LMST03010058	1alpha-hydroxy-24-methylvitaminD2/1alpha-hydroxy-24-methylergocalciferol	Sterol_Lipids	-10.2	-11.9
1056	LMST03020024	26,26,26-trifluoro-25-hydroxy-27-norvitaminD3	Sterol_Lipids	-10.2	-11.9
1057	LMST01010049	7-oxo-cholesterol	Chol, Sterols	-10.2	-11.8
1058	LMST01010005	7-oxocholesterol(d7)	Chol, Sterols	-10.2	-11.8
1059	LMST01031107	24-methylene-cholest-5-en-3beta,23R-diol	Erg, Sterols	-10.2	-11.7
1060	LMST01031119	22S-hydroxy-24-methylene-cholesterol	Erg, Sterols	-10.2	-11.7
1061	LMST03010030	25-hydroxyvitaminD2/25-hydroxyergocalciferol	Sterol_Lipids	-10.2	-11.7
1062	LMST04030242	7alpha-hydroxy-3-oxo-4-cholestenoicacid	Sterol_Lipids	-10.2	-11.7
1063	LMST01010081	Epicholesterol	Chol, Sterols	-10.2	-11.7
1064	LMST01010288	26,27-dinor-cholest-5-en-23-yn-3beta-ol	Chol, Sterols	-10.2	-11.6
1065	LMST03020366	1alpha,25-dihydroxy-24a-homovitaminD3/1alpha,25-dihydroxy-24a-homocholecalciferol	Sterol_Lipids	-10.2	-11.6
1066	LMST04030149	7alpha-hydroxy-3-oxocholest-4-en-27-oicacid	Sterol_Lipids	-10.2	-11.6
1067	LMST03020666	1,24-Dihydroxy-25-fluorovitaminD3	Sterol_Lipids	-10.2	-11.5
1068	ZINC000004095893	taurolithocholate	Metab	-10.2	-11.5
1069	LMST04010327	5beta-Chola-3,8(14),11-trien-24-oic Acid	Sterol_Lipids	-10.2	-11.4
1070	LMST03020125	(23S,25S)-1alpha,25-dihydroxyvitaminD326,23-lactone/(23S,25S)-1alpha,25-dihydroxycholecalciferol26,23-lactone	Sterol_Lipids	-10.2	-11.4
1071	LMST03020328	(24R)-25-fluoro-1alpha,24-dihydroxy-24-methylvitaminD3/(24R)-25-fluoro-1alpha,24-dihydroxy-24-methylcholecalciferol	Sterol_Lipids	-10.2	-11.4
1072	LMST01010315	24-norcholesterol	Chol, Sterols	-10.2	-11.4
1073	LMST01010205	5beta-cholestanone	Chol, Sterols	-10.2	-11.4
1074	LMST05010064	Dehydroisoandrosterone3-glucuronide	Steroids, Androgens, Sterol_Lipids	-10.2	-11.4
1075	LMST04010433	3beta-Hydroxychola-5,7-dien-24-oic Acid	Sterol_Lipids	-10.2	-11.3
1076	LMST03020231	1alpha-hydroxyvitaminD3/1alpha-hydroxycholecalciferol	Sterol_Lipids	-10.2	-11.3
1077	LMST01010009	5,6beta-epoxy-cholesterol(d7)	Chol, Sterols	-10.2	-11.3
1078	LMST04030235	7beta-hydroxy-cholestenoicacid	Sterol_Lipids	-10.2	-11.3
1079	LMST01010139	Lophanol	Chol, Sterols	-10.2	-11.3
1080	LMST01010236	4alpha-methyl-5alpha-cholesta-8-en-3-one	Chol, Sterols	-10.2	-11.2
1081	LMST04010264	Chol-4-en-24-oic Acid	Sterol_Lipids	-10.2	-11.2
1082	LMST04010265	Chol-5-en-24-oic Acid	Sterol_Lipids	-10.2	-11.2
1083	LMST04010270	7-Oxo-5alpha-cholan-24-oic Acid	Sterol_Lipids	-10.2	-11.2
1084	LMST03020318	(22E)-(25S)-25-hydroxy-26-methyl-22,23-didehydrovitaminD3/(22E)-(25S)-25-hydroxy-26-methyl-22,23-didehydrocholecalciferol	Sterol_Lipids	-10.2	-11.2
1085	LMST03020104	(22E)-25-hydroxy-24-oxo-22,23-didehydrovitaminD3/(22E)-25-hydroxy-24-oxo-22,23-didehydrocholecalciferol	Sterol_Lipids	-10.2	-11.2
1086	LMST03010011	(24R)-24-fluoro-1alpha,25-dihydroxyvitaminD2/(24R)-24-fluoro-1alpha,25-dihydroxyergocalciferol	Sterol_Lipids	-10.2	-11.2
1087	LMST03020046	1alpha,25-dihydroxy-24-norvitaminD3/1alpha,25-dihydroxy-24-norcholecalciferol	Sterol_Lipids	-10.2	-11.2
1088	LMST05020064	25-hydroxy-cholesterol3-sulfate	Sterol_Lipids	-10.2	-11.2
1089	LMST01010278	Cholesterol-5alpha-hydroperoxide	Chol, Sterols	-10.2	-11.2
1090	LMST04010321	(22E)-3beta-Hydroxychola-5,22-dien-24-oic Acid	Sterol_Lipids	-10.2	-11.1
1091	LMST04010393	12alpha-Hydroxy-3-oxochola-1,4,6-trien-24-oic Acid	Sterol_Lipids	-10.2	-11.1
1092	LMST03020151	(22Z)-1beta-hydroxy-22,23-didehydrovitaminD3/(22Z)-1beta-hydroxy-22,23-didehydrocholecalciferol	Sterol_Lipids	-10.2	-11.1
1093	LMST03010065	26,27-Dihomo-1alpha-hydroxyvitaminD2	Sterol_Lipids	-10.2	-11.1
1094	LMST01030126	6-Deoxotyphasterol	Erg, Sterols	-10.2	-11.1
1095	LMST04010407	(22E)-12alpha-Hydroxy-3-oxochola-1,4,22-trien-24-oic Acid	Sterol_Lipids	-10.2	-11
1096	ZINC000095618861	BuspironeN-Oxide	World_NOT_FDA	-10.2	-11
1097	ZINC000000537802	Glisolamide	World_NOT_FDA	-10.2	-11
1098	LMST01040167	Saringosterol	Sterols	-10.2	-11
1099	LMST01040175	(20S,24S)-24-ethylthornasterol	Sterols	-10.2	-10.9
1100	LMST03020659	1-HydroxyprevitaminD3diacetate	Sterol_Lipids	-10.2	-10.9
1101	LMST03020047	1alpha,25-dihydroxy-19-norprevitaminD3/1alpha,25-dihydroxy-19-norprecholecalciferol	Sterol_Lipids	-10.2	-10.9
1102	LMST03020160	24,25-epoxy-1alpha-hydroxyvitaminD3/24,25-epoxy-1alpha-hydroxycholecalciferol	Sterol_Lipids	-10.2	-10.9
1103	LMST01030101	Obtusifoliol	Erg, Sterols	-10.2	-10.9
1104	LMST03020105	(22E)-(24R)-1alpha,24-dihydroxy-26,27-cyclo-22,23-didehydrovitaminD3/(22E)-(24R)-1alpha,24-dihydroxy-26,27-cyclo-22,23-didehydrocholecalciferol	Sterol_Lipids	-10.2	-10.8
1105	LMST03020096	1alpha,25-dihydroxy-16,17,23,23,24,24-hexadehydrovitaminD3/1alpha,25-dihydroxy-16,17,23,23,24,24-hexadehydrocholecalciferol	Sterol_Lipids	-10.2	-10.8
1106	ZINC000003872931	avapro	FDA	-10.2	-10.8
1107	LMST03020629	1alpha,25-Dihydroxy-2Z-ethylidene-19-norvitaminD3	Sterol_Lipids	-10.2	-10.7
1108	LMST03010043	5(E)-1alpha,25-dihydroxy-24-epivitaminD2/5(E)-1alpha,25-dihydroxy-24-epiergocalciferol	Sterol_Lipids	-10.2	-10.7
1109	LMST03010047	5(E)-1beta,25-dihydroxy-24-epivitaminD2/5(E)-1beta,25-dihydroxy-24-epiergocalciferol	Sterol_Lipids	-10.2	-10.7
1110	ZINC000257416692	5alpha-Cholest-7-en-3-one	Metab	-10.2	-10.7
1111	LMST03020277	(6R)-6,19-epidioxy-1alpha-hydroxy-6,19-dihydrovitaminD3/(6R)-6,19-epidioxy-1alpha-hydroxy-6,19-dihydrocholecalciferol	Sterol_Lipids	-10.2	-10.6
1112	ZINC000118937099	7-oxo-b-sitosterol	Metab	-10.2	-10.6
1113	LMST03020157	calicoferolE	Sterol_Lipids	-10.2	-10.6
1114	ZINC000003938750	Canrenoate	World_NOT_FDA	-10.2	-10.6
1115	ZINC000003814360	Dht	Metab, World_NOT_FDA	-10.2	-10.6
1116	LMST04010166	7alpha-Hydroxy-12-oxo-5alpha-cholan-24-oic Acid	Sterol_Lipids	-10.2	-10.5
1117	LMST01010270	15-ketocholestane	Chol, Sterols	-10.2	-10.5
1118	LMST03020565	25-dihydroxy-19-norvitaminD3/25-dihydroxy-19-norcholecalciferol	Sterol_Lipids	-10.2	-10.5
1119	LMST03020355	2alpha-methyl-20-epi-1alpha,25-dihydroxyvitaminD3/2alpha-methyl-20-epi-1alpha,25-dihydroxycholecalciferol	Sterol_Lipids	-10.2	-10.5
1120	ZINC000004042371	asacoumarinb	Metab	-10.2	-10.5
1121	ZINC000005533363	asacoumarinb	Metab	-10.2	-10.5
1122	ZINC000006393492	clionasterol	Metab	-10.2	-10.5
1123	ZINC000003875387	Drolban	World_NOT_FDA	-10.2	-10.5
1124	ZINC000000000391	Indoprofen	World_NOT_FDA	-10.2	-10.5
1125	ZINC000082077808		Metab	-10.2	-10.5
1126	LMST01010136	14-Methyl-cholest-8-en-3beta-ol	Chol, Sterols	-10.2	-10.4
1127	LMST01010285	24-vinyloxy-cholest-5,23Z-dien-3beta-ol	Chol, Sterols	-10.2	-10.4
1128	LMST02020087	11-Ketoetiocholanolone	Steroids, Androgens, Sterol_Lipids	-10.2	-10.4
1129	ZINC000002120337	16-pregnolone	Metab	-10.2	-10.4
1130	LMST03020626	1alpha,25-Dihydroxy-2alpha-(3-hydroxypropyl)vitaminD3	Sterol_Lipids	-10.2	-10.4
1131	ZINC000005758832	7-hydroxycholesterol	Metab	-10.2	-10.4
1132	LMST02020013	Methandrostenolone	Steroids, Androgens, Sterol_Lipids	-10.2	-10.4
1133	ZINC000014616102	ochratoxinc	Metab	-10.2	-10.4
1134	LMST01031096	StoloniferoneI	Erg, Sterols	-10.2	-10.4
1135	ZINC000022033882	Eprazinone	World_NOT_FDA	-10.2	-10.3
1136	ZINC000003873817	Nicergoline	World_NOT_FDA	-10.2	-10.3
1137	ZINC000100022637	tpv	FDA	-10.2	-10.3
1138	LMST03020249	(6S)-6,19-epidioxy-6,19-dihydrovitaminD3/(6S)-6,19-epidioxy-6,19-dihydrocholecalciferol	Sterol_Lipids	-10.2	-10.2
1139	LMST02020110	1-testosterone	Steroids, Androgens, Sterol_Lipids	-10.2	-10.2
1140	ZINC000000899429	6-prenylnaringenin	Metab	-10.2	-10.2
1141	LMST01031159	CalvasterolA	Erg, Sterols	-10.2	-10.2
1142	ZINC000005854353	luteone	Metab	-10.2	-10.2
1143	ZINC000001999256	Promestriene	World_NOT_FDA	-10.2	-10.2
1144	ZINC000004098928	sesamolinol	Metab	-10.2	-10.2
1145	ZINC000014610077		Metab	-10.2	-10.2
1146	ZINC000257555539		Metab	-10.2	-10.2
1147	LMST01080050	Episceptrumgenin	Sterols	-10.1	-13
1148	LMST03020035	(17E)-1alpha,25-dihydroxy-17,20-didehydro-21-norvitaminD3/(17E)-1alpha,25-dihydroxy-17,20-didehydro-21-norcholecalciferol	Sterol_Lipids	-10.1	-12.1
1149	LMST03020545	1alpha,25-dihydroxy-26,26,26,27,27,27-hexafluoro-16,17,23,23,24,24-hexadehydro-19-norvitaminD3/1alpha,25-dihydroxy-26,26,26,27,27,27-hexafluoro-16,17,23,23,24,24-hexadehydro-19-norcholecalciferol	Sterol_Lipids	-10.1	-12.1
1150	LMST03020673	25-Hydroxy-6,19-dihydro-6,19-ethanovitaminD3	Sterol_Lipids	-10.1	-12.1
1151	LMST01010308	16beta,20S-dihydroxycholestan-3-one	Chol, Sterols	-10.1	-12
1152	LMST01080040	Kammogenin	Sterols	-10.1	-11.9
1153	LMST03020121	(23S,25R)-25-hydroxyvitaminD326,23-peroxylactone/(23S,25R)-25-hydroxycholecalciferol26,23-peroxylactone	Sterol_Lipids	-10.1	-11.8
1154	LMST03020171	1alpha,25-dihydroxy-16,17-didehydrovitaminD3/1alpha,25-dihydroxy-16,17-didehydrocholecalciferol	Sterol_Lipids	-10.1	-11.8
1155	LMST03010007	1alpha,25-dihydroxy-24-oxo-23-azavitaminD2/1alpha,25-dihydroxy-24-oxo-23-azaergocalciferol	Sterol_Lipids	-10.1	-11.8
1156	LMST04030260	7alpha,24S-dihydroxy-3-oxocholest-4-en-(25S)26-oic acid	Sterol_Lipids	-10.1	-11.8
1157	ZINC000248290294	Dihydrobrassicasterol	Metab	-10.1	-11.8
1158	LMST01010094	4alpha-methyl-cholest-7-en-3beta-ol	Chol, Sterols	-10.1	-11.7
1159	ZINC000004474571	(5E)-ergocalciferol	World_NOT_FDA	-10.1	-11.7
1160	LMST03010041	1alpha,25-dihydroxy-24-epivitaminD2/1alpha,25-dihydroxy-24-epiergocalciferol	Sterol_Lipids	-10.1	-11.7
1161	LMST03020145	24,24-difluoro-1alpha,25-dihydroxyvitaminD3/24,24-difluoro-1alpha,25-dihydroxycholecalciferol	Sterol_Lipids	-10.1	-11.7
1162	LMST01010122	Cholesta-5,7-diene-1,3-diol	Chol, Sterols	-10.1	-11.7
1163	ZINC000257536028	7-dehydrodesmosterol	Metab	-10.1	-11.6
1164	LMST04010269	5beta-Chol-8(14)-en-24-oic Acid	Sterol_Lipids	-10.1	-11.5
1165	LMST05020013	26-hydroxycholesterol3-sulfate	Sterol_Lipids	-10.1	-11.5
1166	ZINC000013537287	Desmethylastemizole	World_NOT_FDA	-10.1	-11.5
1167	LMST04010233	3-oxochol-4-en-24-oic acid	Sterol_Lipids	-10.1	-11.4
1168	LMST04010363	3,7,12-Trioxochol-4-en-24-oic Acid	Sterol_Lipids	-10.1	-11.4
1169	LMST03020127	(20R,24R)-20-fluoro-1alpha,24-dihydroxy-26,27-cyclovitaminD3/(20R,24R)-20-fluoro-1alpha,24-dihydroxy-26,27-cyclocholecalciferol	Sterol_Lipids	-10.1	-11.4
1170	LMST01010145	22S-hydroxycholesterol(d7)	Chol, Sterols	-10.1	-11.4
1171	LMST01010287	26,27-bisnor-22-dehydro-cholesterol	Chol, Sterols	-10.1	-11.4
1172	LMST03020343	(22S)-25-hydroxy-22-methoxyvitaminD3/(22S)-25-hydroxy-22-methoxycholecalciferol	Sterol_Lipids	-10.1	-11.3
1173	LMST03020058	(24S)-1alpha,24-dihydroxy-22-oxavitaminD3/(24S)-1alpha,24-dihydroxy-22-oxacholecalciferol	Sterol_Lipids	-10.1	-11.3
1174	LMST01040151	(3beta,24R,24'R)-fucosterolepoxide	Sterols	-10.1	-11.3
1175	ZINC000002585491	1,2,3,4-Tetrahydro-1-phenyl-4-(1-phenylethyl)naphthalene	Metab	-10.1	-11.3
1176	LMST03020255	22-ethyl-1alpha,22-dihydroxy-25,26,27-trinorvitaminD3/22-ethyl-1alpha,22-dihydroxy-25,26,27-trinorcholecalciferol	Sterol_Lipids	-10.1	-11.3
1177	LMST03020156	23,24-didehydro-25-hydroxyvitaminD3/23,24-didehydro-25-hydroxycholecalciferol	Sterol_Lipids	-10.1	-11.3
1178	LMST01010147	27-hydroxy-cholesterol(d6)	Chol, Sterols	-10.1	-11.3
1179	LMST05030018	3beta-Hydroxy-7-oxochol-5-en-24-oyl-glycine	Sterol_Lipids	-10.1	-11.3
1180	ZINC000100822245	isosilybin	Metab	-10.1	-11.3
1181	LMST04010399	12beta-Hydroxy-3-oxochol-4-en-24-oic Acid	Sterol_Lipids	-10.1	-11.2
1182	LMST03020563	1beta,25-dihydroxy-3-deoxy-19-norvitaminD3/1beta,25-dihydroxy-3-deoxy-19-norcholecalciferol	Sterol_Lipids	-10.1	-11.2
1183	LMST01050021	24E-propylidenecholesterol	Sterols	-10.1	-11.2
1184	LMST03010066	26,27-Dihomo-1alpha-hydroxy-24-epivitaminD2	Sterol_Lipids	-10.1	-11.2
1185	LMST05010004	3alpha-androstanediolglucuronide	Steroids, Androgens, Sterol_Lipids	-10.1	-11.2
1186	LMST01040126	Chondrillasterol	Sterols	-10.1	-11.2
1187	LMST04010205	3beta-Hydroxy-5alpha-chol-7-en-24-oic Acid	Sterol_Lipids	-10.1	-11.1
1188	LMST04010236	3,12-Dioxochol-4-en-24-oic Acid	Sterol_Lipids	-10.1	-11.1
1189	LMST03020015	(22R)-22-hydroxy-24,25,26,27-tetranorvitaminD3/(22R)-22-hydroxy-24,25,26,27-tetranorcholecalciferol	Sterol_Lipids	-10.1	-11.1
1190	LMST03020026	1alpha-hydroxy-21-nor-20-oxavitaminD3/1alpha-hydroxy-21-nor-20-oxacholecalciferol	Sterol_Lipids	-10.1	-11.1
1191	LMST01010018	25-hydroxy-cholesterol	Chol, Sterols	-10.1	-11.1
1192	LMST01010146	25-hydroxy-cholesterol(d6)	Chol, Sterols	-10.1	-11.1
1193	ZINC000118937138	isomangiferolicacid	Metab	-10.1	-11.1
1194	LMST05030020	N-(7alpha-Hydroxy-3-oxochol-4-en-24-oyl)-glycine	Sterol_Lipids	-10.1	-11.1
1195	LMST01110017	(25R)-5alpha,6alpha-epoxy-24R,26R-dimethyl-26,27-cyclo-cholestan-3beta-ol	Sterols	-10.1	-11
1196	LMST04010018	12beta-Hydroxy-5alpha-cholan-24-oic Acid	Sterol_Lipids	-10.1	-11
1197	LMST04010054	7alpha,12beta-Dihydroxy-5alpha-cholan-24-oic Acid	Sterol_Lipids	-10.1	-11
1198	LMST03020168	(22E)-(24R)-1alpha,24-dihydroxy-22,23-didehydrovitaminD3/(22E)-(24R)-1alpha,24-dihydroxy-22,23-didehydrocholecalciferol	Sterol_Lipids	-10.1	-11
1199	LMST03020256	(24R)-1alpha,24-dihydroxyvitaminD3/(24R)-1alpha,24-dihydroxycholecalciferol	Sterol_Lipids	-10.1	-11
1200	LMST03020283	1alpha,25-dihydroxy-24a-homo-22-oxavitaminD3/1alpha,25-dihydroxy-24a-homo-22-oxacholecalciferol	Sterol_Lipids	-10.1	-11
1201	LMST03020207	25-fluoro-1alpha-hydroxyvitaminD3/25-fluoro-1alpha-hydroxycholecalciferol	Sterol_Lipids	-10.1	-11
1202	LMST01010330	14alpha-methyl-5alpha-cholest-9(11)-en-3beta-ol	Chol, Sterols	-10.1	-10.9
1203	LMST04010045	3alpha,12beta-Dihydroxy-5alpha-cholan-24-oic Acid	Sterol_Lipids	-10.1	-10.9
1204	LMST04010365	3,7,12-Trioxochola-1,4-dien-24-oic Acid	Sterol_Lipids	-10.1	-10.9
1205	LMST03020482	(22E,24E)-1alpha,25-dihydroxy-26,27-dimethyl-22,23,24,24a-tetradehydro-24a,24b-dihomovitaminD3/(22E,24E)-1alpha,25-dihydroxy-26,27-dimethyl-22,23,24,24a-tetradehydro-24a,24b-dihomocholecalciferol	Sterol_Lipids	-10.1	-10.9
1206	LMST03020098	(22E)-(25R)-26,26,26-trifluoro-1alpha,25-dihydroxy-22,23-didehydrovitaminD3/(22E)-(25R)-26,26,26-trifluoro-1alpha,25-dihydroxy-22,23-didehydrocholecalciferol	Sterol_Lipids	-10.1	-10.9
1207	LMST01040277	12alpha-hydroxySitosterol	Sterols	-10.1	-10.9
1208	LMST03010040	1alpha,25-dihydroxyvitaminD2/1alpha,,25-dihydroxyergocalciferol	Sterol_Lipids	-10.1	-10.9
1209	LMST03010053	1alpha,25,28-trihydroxyvitaminD2/1alpha,25,28-trihydroxyergocalciferol	Sterol_Lipids	-10.1	-10.9
1210	LMST01010128	24S,25-dihydroxycholesterol	Chol, Sterols	-10.1	-10.9
1211	LMST01030127	6-Deoxocastasterone	Erg, Sterols	-10.1	-10.9
1212	LMST01031035	Xestosterol	Erg, Sterols	-10.1	-10.9
1213	LMST01010229	4alpha-formyl-4beta-methyl-5alpha-cholesta-8,24-dien-3beta-ol	Chol, Sterols	-10.1	-10.8
1214	ZINC000005167248	17-hydroxypregnenolonesulfate	Metab	-10.1	-10.8
1215	LMST03020097	9,14,19,19,19-pentadeuterio-1alpha,25-dihydroxyprevitaminD3/9,14,19,19,19-pentadeuterio-1alpha,25-dihydroxyprecholecalciferol	Sterol_Lipids	-10.1	-10.8
1216	LMST01060008	A-norgorgostanol	Sterols	-10.1	-10.8
1217	LMST01010448	cholesterylbeta-D-xyloside	Chol, Sterols	-10.1	-10.8
1218	ZINC000003797541	zytiga	FDA	-10.1	-10.8
1219	LMST04010434	4,12alpha-Dihydroxy-3-oxochol-4-en-24-oic Acid	Sterol_Lipids	-10.1	-10.7
1220	LMST03020158	1-oxoprevitaminD3/1-oxoprecholecalciferol	Sterol_Lipids	-10.1	-10.7
1221	ZINC000257398171	31-Norcyclolaudenone	Metab	-10.1	-10.7
1222	LMST04030243	7alpha,12alpha-dihydroxy-3-oxo-4-cholestenoicacid	Sterol_Lipids	-10.1	-10.7
1223	LMST02020027	Mestanolone	Steroids, Androgens, Sterol_Lipids	-10.1	-10.7
1224	ZINC000003813047	oxandrolone	FDA	-10.1	-10.7
1225	LMST03020090	(23S)-26,26,26,27,27,27-hexafluoro-1alpha,23,25-trihydroxyvitaminD3/(23S)-26,26,26,27,27,27-hexafluoro-1alpha,23,25-trihydroxycholecalciferol	Sterol_Lipids	-10.1	-10.6
1226	LMST03020133	(25S)-26,26,26-trifluoro-1alpha,25-dihydroxyvitaminD3/(25S)-26,26,26-trifluoro-1alpha,25-dihydroxycholecalciferol	Sterol_Lipids	-10.1	-10.6
1227	LMST03020650	1alpha-Hydroxy-2-methylene-19-nor-(20S)-bishomopregnacalciferol	Sterol_Lipids	-10.1	-10.6
1228	LMST01140003	7-oxotyphasterol	Sterols	-10.1	-10.6
1229	LMST04030150	7alpha,12alpha-dihydroxy-3-oxocholest-4-en-27-oicacid	Sterol_Lipids	-10.1	-10.6
1230	ZINC000005758784	Lumisterol3	Metab	-10.1	-10.6
1231	LMST01031056	Sipalosterol	Erg, Sterols	-10.1	-10.6
1232	LMST04010437	(20S)-3beta-Hydroxychola-5,16-dien-24-oic Acid	Sterol_Lipids	-10.1	-10.5
1233	ZINC000014610081	(-)-moracinp	Metab	-10.1	-10.5
1234	LMST04030238	3beta,5alpha,6beta-Trihydroxycholestan-(25R)26-oicacid	Sterol_Lipids	-10.1	-10.5
1235	LMST02020079	5alpha-androst-16-en-3-one	Steroids, Androgens, Sterol_Lipids	-10.1	-10.5
1236	LMST02020001	Androsterone	Steroids, Androgens, Sterol_Lipids	-10.1	-10.5
1237	ZINC000002386791	cerebrosterin	Metab	-10.1	-10.5
1238	ZINC000004213057	DromostanolonePropionate	World_NOT_FDA	-10.1	-10.5
1239	ZINC000100073786	Ecamsule	FDA	-10.1	-10.5
1240	ZINC000014610083	Moracin P	Metab	-10.1	-10.5
1241	LMST04010219	3beta,12alpha-Dihydroxychol-5-en-24-oic Acid	Sterol_Lipids	-10.1	-10.4
1242	LMST04010240	12alpha-Hydroxy-3-oxochol-4-en-24-oic Acid	Sterol_Lipids	-10.1	-10.4
1243	LMST03020169	(22E)-(24S)-1alpha,24-dihydroxy-22,23-didehydrovitaminD3/(22E)-(24S)-1alpha,24-dihydroxy-22,23-didehydrocholecalciferol	Sterol_Lipids	-10.1	-10.4
1244	LMST03020564	25-dihydroxy-19-nor-3-epivitaminD3/25-dihydroxy-19-nor-3-epicholecalciferol	Sterol_Lipids	-10.1	-10.4
1245	LMST02020017	Bolasterone	Steroids, Androgens, Sterol_Lipids	-10.1	-10.4
1246	ZINC000001481841	Implanon	World_NOT_FDA	-10.1	-10.4
1247	ZINC000003975663	Merimepodib	World_NOT_FDA	-10.1	-10.4
1248	LMST02020056	5alpha-androstane	Steroids, Androgens, Sterol_Lipids	-10.1	-10.3
1249	ZINC000256068536	(+)-Fargesin	Metab	-10.1	-10.3
1250	LMST02020086	11-Hydroxyandrosterone	Steroids, Androgens, Sterol_Lipids	-10.1	-10.3
1251	LMST01010309	20S-Hydroxycholest-1-en-3,16-dione	Chol, Sterols	-10.1	-10.3
1252	LMST02020000	Androstraneskeleton	Steroids, Androgens, Sterol_Lipids	-10.1	-10.3
1253	ZINC000003814184	Benazeprilat	World_NOT_FDA	-10.1	-10.3
1254	LMST01031016	campest-4-en-3beta-ol	Erg, Sterols	-10.1	-10.3
1255	ZINC000022033872	Eprazinone	World_NOT_FDA	-10.1	-10.3
1256	ZINC000014642862	icosylpalmitate	Metab	-10.1	-10.3
1257	ZINC000005430812	rub	Metab	-10.1	-10.3
1258	ZINC000001558484	rutamarin	Metab	-10.1	-10.3
1259	LMST01010228	4alpha-carboxy-5alpha-cholesta-8-en-3beta-ol	Chol, Sterols	-10.1	-10.2
1260	LMST02020095	5a-Androstan-3b-ol	Steroids, Androgens, Sterol_Lipids	-10.1	-10.2
1261	LMST04030226	(25S)-3-oxo-cholest-1,4-dien-26-sulfate	Sterol_Lipids	-10.1	-10.2
1262	ZINC000006067936	17-Hydroxymethylethisterone	World_NOT_FDA	-10.1	-10.2
1263	LMST01010112	CucurbitacinL	Chol, Sterols	-10.1	-10.2
1264	ZINC000031291853	E2-3s-17s	World_NOT_FDA	-10.1	-10.2
1265	ZINC000003802417	entereg	FDA	-10.1	-10.2
1266	ZINC000014642865	icosylpalmitate	Metab	-10.1	-10.2
1267	ZINC000000898340	rutamarin	Metab	-10.1	-10.2
1268	ZINC000000538337	Sertindole	World_NOT_FDA	-10.1	-10.2
1269	LMST01040265	Stigmastane-3,6-dione	Sterols	-10.1	-10.2
1270	ZINC000003914813	tudca	Metab	-10.1	-10.2
1271	ZINC000100829409	zanthobisquinolone	Metab	-10.1	-10.2
	B) 5HK1 ligands (395)
				Ecalc
	Database ID	Compound name	Category	5HK1	6DK1
1	ZINC000000021067	Sarizotan	World_NOT_FDA	-11.9	0
2	ZINC000008220551	solanidine	Metab	-11.9	0
3	ZINC000014210642	Azilsartanmedoxomil	FDA	-11.9	0
4	ZINC000026892643	Clobetasol	World_NOT_FDA	-11.7	0
5	ZINC000033902346	Mga	World_NOT_FDA	-11.6	0
6	ZINC000001550499	Cinacalcet	FDA	-11.5	0
7	ZINC000001650575	(-)-Cryptotanshinone	Metab	-11.5	0
8	ZINC000002109876	Cryptotanshinone	Metab	-11.5	0
9	LMST02030239	PenicildioneB	Steroids, Estrogens, Sterol_Lipids	-11.4	0
10	ZINC000004216862	Meprednisone	World_NOT_FDA	-11.4	0
11	ZINC000003831401	Pyrvinium	World_NOT_FDA	-11.3	0
12	ZINC000004293351	Irenolone	Metab	-11.3	0
13	ZINC000014455484	2-hydroxy-4-(4-methoxyphenyl)-1h-phenalen-1-one	Metab	-11.3	0
14	ZINC000095620870	UrolithinB3-O-Glucuronide	Metab	-11.3	0
15	LMST05010011	Estrone3-glucuronide	Steroids, Sterol_Lipids	-11.2	0
16	ZINC000003644943	LicoriisoflavanA	Metab	-11.2	0
17	ZINC000003823475	Eletriptan	FDA	-11.2	0
18	ZINC000004213363	Fluprednidene	World_NOT_FDA	-11.2	0
19	ZINC000014727570	LicoriisoflavanA	Metab	-11.2	0
20	ZINC000040899447	Erivedge	FDA	-11.2	0
21	ZINC000067664978	O-DeethylatedCandesartan	World_NOT_FDA	-11.2	0
22	LMST02030103	Fludrocortisone	Steroids, Estrogens, Sterol_Lipids	-11.1	0
23	LMST05010040	4-Hydroxyandrostenedioneglucuronide	Steroids, Androgens, Sterol_Lipids	-11.1	0
24	ZINC000000001624	(-)-Lobeline	World_NOT_FDA	-11.1	0
25	ZINC000000598390	Azilsartan	World_NOT_FDA	-11.1	0
26	ZINC000001653270	orientanolb	Metab	-11.1	0
27	ZINC000001653271	orientanolb	Metab	-11.1	0
28	ZINC000001858795	OrientanolB	Metab	-11.1	0
29	ZINC000014762761	GancaoninO	Metab	-11.1	0
30	ZINC000001858796	OrientanolB	Metab	-11	0
31	ZINC000004097304		FDA	-11	0
32	ZINC000011666642	prunetrin	Metab	-11	0
33	ZINC000014727569		Metab	-11	0
34	ZINC000022061277	4'-Hydroxytrazodone	World_NOT_FDA	-11	0
35	LMST01031219	EhrensteroidE	Erg, Sterol_Lipids	-10.9	0
36	LMST02020002	Testosterone	Steroids, Androgens, Sterol_Lipids	-10.9	0
37	LMST02020018	Dehydrotestosterone	Steroids, Androgens, Sterol_Lipids	-10.9	0
38	LMST02030149	(20R)-17,20-dihydroxypregn-4-en-3-one	Steroids, Estrogens, Sterol_Lipids	-10.9	0
39	LMST02030151	17,20-dihydroxypregn-4-en-3-one	Steroids, Estrogens, Sterol_Lipids	-10.9	0
40	LMST02030209	-	Steroids, Estrogens, Sterol_Lipids	-10.9	0
41	ZINC000000189892	7-acetoxy-2-methylisoflavone	Metab	-10.9	0
42	ZINC000000537795	glipizide	FDA	-10.9	0
43	ZINC000001531878		Metab	-10.9	0
44	ZINC000001575028	lambertine	Metab	-10.9	0
45	ZINC000002065942		Metab	-10.9	0
46	ZINC000003945984	vexol	FDA	-10.9	0
47	ZINC000004083557	Corlin	World_NOT_FDA	-10.9	0
48	ZINC000008662732	prunetrin	Metab	-10.9	0
49	ZINC000067664978	o-deethylatedcandesartan	Metab	-10.9	0		DUP	DUP
50	ZINC000077292462	EtodolacAcylGlucuronide	World_NOT_FDA	-10.9	0
51	ZINC000100412689		Metab	-10.9	0
52	ZINC000000643143	nizoral	FDA	-10.8	0
53	ZINC000000900105		Metab	-10.8	0
54	ZINC000001530788	cromolyn	FDA	-10.8	0
55	ZINC000002509755	O-Desmethylcarvedilol	World_NOT_FDA	-10.8	0
56	ZINC000002568036	dantrolene	FDA	-10.8	0
57	ZINC000002584477	p-octyloxybenzylidene-p-cyanoaniline	Metab	-10.8	0
58	ZINC000003874467	Nafamostat	World_NOT_FDA	-10.8	0
59	ZINC000013130921	glycyrol	Metab	-10.8	0
60	ZINC000014819625	3,9-dihydroxy-1-methoxy-2-prenylpterocarpene	Metab	-10.8	0
61	ZINC000059728952		Metab	-10.8	0
62	ZINC000068206930		World_NOT_FDA	-10.8	0
63	ZINC000084758479	brexpiprazole	FDA	-10.8	0
64	ZINC000100048114	e105	Metab	-10.8	0
65	61V		PDB	-10.7	0
66	LMST01031206	CertonardosterolJ	Erg, Sterol_Lipids	-10.7	0
67	LMST02020067	-	Steroids, Androgens, Sterol_Lipids	-10.7	0
68	LMST02020082	6-dehydrotestosterone	Steroids, Androgens, Sterol_Lipids	-10.7	0
69	LMST02030180	prednisone	Steroids, Estrogens, Sterol_Lipids	-10.7	0
70	ZINC000000000655	biltricide	FDA	-10.7	0
71	ZINC000001570586	3,3'-bijuglone	Metab	-10.7	0
72	ZINC000002509755	o-desmethylcarvedilol	Metab	-10.7	0		DUP	DUP
73	ZINC000002528486	o-desmethylcarvedilol	Metab	-10.7	0
74	ZINC000003872493		World_NOT_FDA	-10.7	0
75	ZINC000004099035	Estradiol17bGlucuronide	World_NOT_FDA	-10.7	0
76	ZINC000004654841	demethylphylloquinone	Metab	-10.7	0
77	ZINC000006030359	NaproxenO-Glucuronide	World_NOT_FDA	-10.7	0
78	ZINC000014658236	pipernonaline	Metab	-10.7	0
79	ZINC000019632696	Naftopidil	World_NOT_FDA	-10.7	0
80	ZINC000031771385		Metab	-10.7	0
81	ZINC000100229169	Fluindarol	World_NOT_FDA	-10.7	0
82	LMST01060014	StoloniferoneJ	Sterols	-10.6	0
83	LMST02010012	-	Steroids, Sterol_Lipids	-10.6	0
84	LMST02030090	Cortisone	Steroids, Estrogens, Sterol_Lipids	-10.6	0
85	LMST02030179	prednisolone	Steroids, DeltaL, Estrogens, Sterol_Lipids	-10.6	0
86	LMST02030201	Ethyltestosterone	Steroids, Estrogens, Sterol_Lipids	-10.6	0
87	LMST02030241	PenicildioneD	Steroids, Estrogens, Sterol_Lipids	-10.6	0
88	LMST03010034	(6R)-vitaminD26,19-sulfurdioxideadduct/(6R)-ergocalciferol6,19-sulfurdioxideadduct	Sterol_Lipids	-10.6	0
89	ZINC000000538650	Indiplon	World_NOT_FDA	-10.6	0
90	ZINC000001540998		FDA	-10.6	0
91	ZINC000001849660	halofuginone	Metab	-10.6	0
92	ZINC000001996784	myrbetriq	FDA	-10.6	0
93	ZINC000002008020	benzo[a]pyrene-4,5-oxide	Metab	-10.6	0
94	ZINC000002528486	O-Desmethylcarvedilol	World_NOT_FDA	-10.6	0		DUP	DUP
95	ZINC000002575127	phe-trp	Metab	-10.6	0
96	ZINC000002575132	tyr-trp	Metab	-10.6	0
97	ZINC000003830847	Flubendazole	World_NOT_FDA	-10.6	0
98	ZINC000003871698	Benzthiazide	World_NOT_FDA	-10.6	0
99	ZINC000003876136	luxiq	FDA	-10.6	0
100	ZINC000004098610	Dzn	World_NOT_FDA	-10.6	0
101	ZINC000004228237	Tetra-H-Folate	World_NOT_FDA	-10.6	0
102	ZINC000004654840	demethylphylloquinone	Metab	-10.6	0
103	ZINC000005784191	halofuginone	Metab	-10.6	0
104	ZINC000008582008	N-DesmethylVandetanib	World_NOT_FDA	-10.6	0
105	ZINC000013512486		Metab	-10.6	0
106	ZINC000013838497	piperettine	Metab	-10.6	0
107	ZINC000014651456	phe-trp	Metab	-10.6	0
108	ZINC000014824079	n-caffeoyltryptophan	Metab	-10.6	0
109	ZINC000016343334	previtamind4	Metab	-10.6	0
110	ZINC000021981235	lansoprazolesulfone	Metab	-10.6	0
111	ZINC000034303701	tyr-trp	Metab	-10.6	0
112	ZINC000034303702	tyr-trp	Metab	-10.6	0
113	ZINC000034303703	tyr-trp	Metab	-10.6	0
114	ZINC000070457358		Metab	-10.6	0
115	LMST01031095	StoloniferoneH	Erg, Sterols	-10.5	0
116	LMST01031205	CertonardosterolI	Erg, Sterol_Lipids	-10.5	0
117	LMST02020029	17-Methyltestosterone	Steroids, Androgens, Sterol_Lipids	-10.5	0
118	LMST02030091	18-Hydroxycorticosterone	Steroids, Estrogens, Sterol_Lipids	-10.5	0
119	ZINC000000025958	rucaparib	FDA	-10.5	0
120	ZINC000000402911	fenbendazole	Metab	-10.5	0
121	ZINC000000968326	pioglitazone	FDA	-10.5	0
122	ZINC000000968327	pioglitazone	FDA	-10.5	0
123	ZINC000001529772	piperin	Metab	-10.5	0
124	ZINC000001658901	aurapten	Metab	-10.5	0
125	ZINC000001849658	halofuginone	Metab	-10.5	0
126	ZINC000001849659	halofuginone	Metab	-10.5	0
127	ZINC000002008016	benzo[a]pyrene-4,5-oxide	Metab	-10.5	0
128	ZINC000002008017	benzo[a]pyrene-4,5-oxide	Metab	-10.5	0
129	ZINC000002008019	benzo[a]pyrene-4,5-oxide	Metab	-10.5	0
130	ZINC000002383057	phe-trp	Metab	-10.5	0
131	ZINC000002526388	4'-hydroxycarvedilol	Metab	-10.5	0
132	ZINC000002528509	4'-hydroxycarvedilol	Metab	-10.5	0
133	ZINC000003781942	Vesnarinone	World_NOT_FDA	-10.5	0
134	ZINC000003782818	atacand	FDA	-10.5	0
135	ZINC000003872178	Cypermethrin	World_NOT_FDA	-10.5	0
136	ZINC000003874185	mefloquine	FDA	-10.5	0
137	ZINC000003964126	xarelto	FDA	-10.5	0
138	ZINC000004228235	Tetrahydrofolate	World_NOT_FDA	-10.5	0
139	ZINC000005722488	cyananin	Metab	-10.5	0
140	ZINC000005766454	tachysterol4	Metab	-10.5	0
141	ZINC000005854773	fumitremorgin	Metab	-10.5	0
142	ZINC000007997897	naftin	FDA	-10.5	0
143	ZINC000009330880	Rebamipide	World_NOT_FDA	-10.5	0
144	ZINC000013485433	2-(3-bromo-1,2-thiazol-4-yl)propanal	Metab	-10.5	0
145	ZINC000014505997	1-hydroxypinoresinol	Metab	-10.5	0
146	ZINC000014651453	phe-trp	Metab	-10.5	0
147	ZINC000014658255	piperochromenoicacid	Metab	-10.5	0
148	ZINC000014819291	yinyanghuod	Metab	-10.5	0
149	ZINC000014819293	yinyanghuod	Metab	-10.5	0
150	ZINC000014824075	na-p-hydroxycoumaroyltryptophan	Metab	-10.5	0
151	ZINC000014824077	n-caffeoyltryptophan	Metab	-10.5	0
152	ZINC000015060719	malonyldaidzin	Metab	-10.5	0
153	ZINC000015258073	12a-hydroxymunduserone	Metab	-10.5	0
154	ZINC000053231207	Methysergid	World_NOT_FDA	-10.5	0
155	ZINC000064622563	5b-pregnanediol	Metab	-10.5	0
156	ZINC000070455473	formononetin7-o-glucuronide	Metab	-10.5	0
157	ZINC000095619100	ranolazine	FDA	-10.5	0
158	ZINC000248065217		World_NOT_FDA	-10.5	0
159	ZINC000252679615		FDA	-10.5	0
160	CHEBI143575		Agonists-Antagonists	-10.4	0
161	LMST01010111	CucurbitacinJ	Chol, Sterols	-10.4	0
162	LMST02020070	-	Steroids, Androgens, Sterol_Lipids	-10.4	0
163	LMST02020121	11betaOH-5alpha-androstanedione	Steroids, Androgens, Sterol_Lipids	-10.4	0
164	LMST02030001	Cortisol	Steroids, Estrogens, Sterol_Lipids	-10.4	0
165	LMST02030182	16alpha-hydroxyprogesterone	Steroids, Estrogens, Sterol_Lipids	-10.4	0
166	LMST05020041	17-Beta-Estradiol-3,17-beta-sulfate	Steroids, Sterol_Lipids	-10.4	0
167	ZINC000000601301	bhft	FDA	-10.4	0
168	ZINC000000608172	Amodiaquine	World_NOT_FDA	-10.4	0
169	ZINC000000897085	mefloquine	FDA	-10.4	0
170	ZINC000000899790	5-deoxykievitone	Metab	-10.4	0
171	ZINC000001624462	cyananin	Metab	-10.4	0
172	ZINC000002526388	4&#39	World_NOT_FDA	-10.4	0		DUP	DUP
173	ZINC000003202703	cefaloridine	Metab	-10.4	0
174	ZINC000003779067	berberine	Metab	-10.4	0
175	ZINC000003882036	kenalog	FDA	-10.4	0
176	ZINC000004097285	Beclomethasone	World_NOT_FDA	-10.4	0
177	ZINC000004212854	topicort	FDA	-10.4	0
178	ZINC000008584338	synanthic	Metab	-10.4	0
179	ZINC000009133172	hydroxylansoprazole	Metab	-10.4	0
180	ZINC000011616580	Kad-1229	World_NOT_FDA	-10.4	0
181	ZINC000011616925	folotyn	FDA	-10.4	0
182	ZINC000013559434	omeprazolesulfone	Metab	-10.4	0
183	ZINC000013838494	piperoleinb	Metab	-10.4	0
184	ZINC000014658375	piperundecalidine	Metab	-10.4	0
185	ZINC000014762498	morachalconea	Metab	-10.4	0
186	ZINC000014883348	dihydrophylloquinone	Metab	-10.4	0
187	ZINC000015263983	grifolin	Metab	-10.4	0
188	ZINC000021981274	Hydroxynefazodone	World_NOT_FDA	-10.4	0
189	ZINC000021983537		World_NOT_FDA	-10.4	0
190	ZINC000021999791	Morniflumate	World_NOT_FDA	-10.4	0
191	ZINC000022007371	Fluticasone17beta-CarboxylicAcid	World_NOT_FDA	-10.4	0
192	ZINC000022060952	2-hydroxynevirapine	Metab	-10.4	0
193	ZINC000028817821	barogenin	Metab	-10.4	0
194	ZINC000095616599	terazosin	FDA	-10.4	0
195	ZINC000257487332		Metab	-10.4	0
196	LMST01030130	Typhasterol	Erg, Sterols	-10.3	0
197	LMST02030171	algestone	Steroids, Estrogens, Sterol_Lipids	-10.3	0
198	ZINC000000000973	avobenzone	FDA	-10.3	0
199	ZINC000000013936	Liranaftate	World_NOT_FDA	-10.3	0
200	ZINC000000014669	Ifenprodil	World_NOT_FDA	-10.3	0
201	ZINC000000236891	dimilin	Metab	-10.3	0
202	ZINC000000839083	hydroxylansoprazole	Metab	-10.3	0
203	ZINC000000899792	5-deoxykievitone	Metab	-10.3	0
204	ZINC000000900047	silicaaerogel	Metab	-10.3	0
205	ZINC000000968328	rosiglitazone	FDA	-10.3	0
206	ZINC000000968330	rosiglitazone	FDA	-10.3	0
207	ZINC000001530977	naftifine	FDA	-10.3	0
208	ZINC000001846283	Talinolol	World_NOT_FDA	-10.3	0
209	ZINC000001850376	nix	FDA	-10.3	0
210	ZINC000002005534	Phenothrin	World_NOT_FDA	-10.3	0
211	ZINC000002097389		Metab	-10.3	0
212	ZINC000002097391		Metab	-10.3	0
213	ZINC000002561256	medicagol	Metab	-10.3	0
214	ZINC000002566160		Metab	-10.3	0
215	ZINC000003779067	Berberine	World_NOT_FDA	-10.3	0		DUP	DUP
216	ZINC000003784432	Trandolaprilat	World_NOT_FDA	-10.3	0
217	ZINC000003818726	belinostat	FDA	-10.3	0
218	ZINC000003830820	Etretinate	World_NOT_FDA	-10.3	0
219	ZINC000003871723	BayH4502	World_NOT_FDA	-10.3	0
220	ZINC000003875393	tbz	FDA	-10.3	0
221	ZINC000003875985	beta-tocopherol	Metab	-10.3	0
222	ZINC000003938686	palbociclib	FDA	-10.3	0
223	ZINC000003983936	Flumetasone	World_NOT_FDA	-10.3	0
224	ZINC000004097440	asmanex	FDA	-10.3	0
225	ZINC000004212939	Diflucortolone	World_NOT_FDA	-10.3	0
226	ZINC000004228238	Tetra-H-Folate	World_NOT_FDA	-10.3	0
227	ZINC000004228266	methylfolate	Metab	-10.3	0
228	ZINC000004228267	methylfolate	Metab	-10.3	0
229	ZINC000004288876	isoambrettolide	Metab	-10.3	0
230	ZINC000004743888	M1a	World_NOT_FDA	-10.3	0
231	ZINC000008584337	synanthic	Metab	-10.3	0
232	ZINC000008662733	prunetrin	Metab	-10.3	0
233	ZINC000013129998	meloxicam	FDA	-10.3	0
234	ZINC000013335591	sageone	Metab	-10.3	0
235	ZINC000014610079		Metab	-10.3	0
236	ZINC000014762985	glicoricone	Metab	-10.3	0
237	ZINC000014824027	nb-p-coumaroyltryptamine	Metab	-10.3	0
238	ZINC000019362721	Eprazinone	World_NOT_FDA	-10.3	0
239	ZINC000021981235	LansoprazoleSulfone	World_NOT_FDA	-10.3	0		DUP	DUP
240	ZINC000031318695	flupoxam	Metab	-10.3	0
241	ZINC000040164484		Metab	-10.3	0
242	ZINC000059200542		Metab	-10.3	0
243	ZINC000248065211		World_NOT_FDA	-10.3	0
244	ZINC000253616140		Metab	-10.3	0
245	ZINC000253616141		Metab	-10.3	0
246	ZINC000256497800		Metab	-10.3	0
247	ChEBI_104237	4-PPBP	Agonists-Antagonists	-10.2	0
248	LMST01010361	22-iso-ecdysone	Chol, Sterols	-10.2	0
249	LMST01010479	CertonardosterolF	Chol, Sterol_Lipids	-10.2	0
250	LMST01031059	-	Erg, Sterols	-10.2	0
251	LMST01031157	-	Erg, Sterols	-10.2	0
252	LMST01060034	LobophysterolD	Sterol_Lipids	-10.2	0
253	LMST02010042	19-norandrosterone	Steroids, Sterol_Lipids	-10.2	0
254	LMST02010044	nandrolone	Steroids, Sterol_Lipids	-10.2	0
255	LMST02020042	5alpha-dihydrotesosterone	Steroids, Androgens, Sterol_Lipids	-10.2	0
256	LMST02020104	Epietiocholanolone	Steroids, Androgens, Sterol_Lipids	-10.2	0
257	LMST02030086	11-deoxycortisol	Steroids, Estrogens, Sterol_Lipids	-10.2	0
258	LMST02030130	Allopregnanolone	Steroids, Estrogens, Sterol_Lipids	-10.2	0
259	LMST03020305	(6RS,24R)-24,25-dihydroxyvitaminD36,19-sulfurdioxideadduct/(6RS,24R)-24,25-dihydroxycholecalciferol6,19-sulfurdioxideadduct	Sterol_Lipids	-10.2	0
260	LMST04010171	-	Sterol_Lipids	-10.2	0
261	LMST05010019	16alpha,17beta-Estriol17-(beta-D-glucuronide)	Steroids, Sterol_Lipids	-10.2	0
262	ZINC000000014551	Ifenprodil	World_NOT_FDA	-10.2	0
263	ZINC000000016678	Zaltoprofen	World_NOT_FDA	-10.2	0
264	ZINC000000121541	mebendazole	FDA	-10.2	0
265	ZINC000000125047	Cinchophen	World_NOT_FDA	-10.2	0
266	ZINC000000537811	Halazepam	World_NOT_FDA	-10.2	0
267	ZINC000000607900	Fominoben	World_NOT_FDA	-10.2	0
268	ZINC000000622260		Metab	-10.2	0
269	ZINC000000897089	mefloquine	FDA	-10.2	0
270	ZINC000000899884	maackiain	Metab	-10.2	0
271	ZINC000000900727	flumioxazin	Metab	-10.2	0
272	ZINC000001531881	cubebin	Metab	-10.2	0
273	ZINC000001544805	Urapidil	World_NOT_FDA	-10.2	0
274	ZINC000001620280	(-)-maackiain	Metab	-10.2	0
275	ZINC000001620281	(-)-maackiain	Metab	-10.2	0
276	ZINC000001669780	pbn	Metab	-10.2	0
277	ZINC000001698105	Pipazetate	World_NOT_FDA	-10.2	0
278	ZINC000001714287	piperanine	Metab	-10.2	0
279	ZINC000001842745	Bemetizide	World_NOT_FDA	-10.2	0
280	ZINC000001850213		Metab	-10.2	0
281	ZINC000001850374	nix	FDA	-10.2	0
282	ZINC000002005305	5-methyltetrahydrofolate	FDA	-10.2	0
283	ZINC000002036915	Aminopterin	World_NOT_FDA	-10.2	0
284	ZINC000002392256	trifoliol	Metab	-10.2	0
285	ZINC000002529828	8-geranyloxypsoralen	Metab	-10.2	0
286	ZINC000002572666		World_NOT_FDA	-10.2	0
287	ZINC000003814379		World_NOT_FDA	-10.2	0
288	ZINC000003875362	Fluprednisolone	World_NOT_FDA	-10.2	0
289	ZINC000003915645	Simendan	World_NOT_FDA	-10.2	0
290	ZINC000004099032	estramustine	FDA	-10.2	0
291	ZINC000004102227	pregnanolonei	Metab	-10.2	0
292	ZINC000004217399	Ramiprilat	World_NOT_FDA	-10.2	0
293	ZINC000004228266	MethylFolate	World_NOT_FDA	-10.2	0		DUP	DUP
294	ZINC000004693575	omeprazole	FDA	-10.2	0
295	ZINC000004787209		Metab	-10.2	0
296	ZINC000005158948		Metab	-10.2	0
297	ZINC000005273906	trp-phe	Metab	-10.2	0
298	ZINC000006093393	5-Hydroxydantrolene	World_NOT_FDA	-10.2	0
299	ZINC000008214693		Metab	-10.2	0
300	ZINC000009060429	Tenatoprazole	World_NOT_FDA	-10.2	0
301	ZINC000011616579	Kad-1229	World_NOT_FDA	-10.2	0
302	ZINC000012341529	Exisulind	World_NOT_FDA	-10.2	0
303	ZINC000013434355		Metab	-10.2	0
304	ZINC000013434357		Metab	-10.2	0
305	ZINC000013570997	glycophymine	Metab	-10.2	0
306	ZINC000013677763	nb-feruloyltryptamine	Metab	-10.2	0
307	ZINC000014587260	marmin	Metab	-10.2	0
308	ZINC000014655907	piericidina	Metab	-10.2	0
309	ZINC000014687882	roquefortine	Metab	-10.2	0
310	ZINC000014952767	E-3174	World_NOT_FDA	-10.2	0
311	ZINC000018847051	y-baptigenin	Metab	-10.2	0
312	ZINC000022058301	EletriptanN-Oxide	World_NOT_FDA	-10.2	0
313	ZINC000031318699	azimsulfuron	Metab	-10.2	0
314	ZINC000035454640	genistein4'-o-glucuronide	Metab	-10.2	0
315	ZINC000053151228	Methysergide	World_NOT_FDA	-10.2	0
316	ZINC000064261573		Metab	-10.2	0
317	ZINC000070455478		Metab	-10.2	0
318	ZINC000077312860	cis-resveratrol4'-o-glucuronide	Metab	-10.2	0
319	ZINC000077319562	Trandolapril-D5Diketopiperazine	World_NOT_FDA	-10.2	0
320	ZINC000085205451		FDA	-10.2	0
321	ZINC000085510874		Metab	-10.2	0
322	ZINC000090516648		Metab	-10.2	0
323	ZINC000150374458		World_NOT_FDA	-10.2	0
324	ZINC000256497802		Metab	-10.2	0
325	ZINC000256497803		Metab	-10.2	0
326	CHEBI52615		Agonists-Antagonists	-10.1	0
327	LMST01010132	6,24S-dihydroxycholesterol	Chol, Sterols	-10.1	0
328	LMST01010183	2-deoxyecdysone22-phosphate	Chol, Sterols	-10.1	0
329	LMST01010275	5alpha-hydroxycholesterol	Chol, Sterols	-10.1	0
330	LMST01031190	-	Erg, Sterols	-10.1	0
331	LMST01031196	-	Erg, Sterols	-10.1	0
332	LMST02020054	6beta-hydroxytestosterone	Steroids, Androgens, Sterol_Lipids	-10.1	0
333	LMST02030026	Aldosterone	Steroids, Estrogens, Sterol_Lipids	-10.1	0
334	LMST03020675	1alpha,25-dihydroxy-2alpha-(3-hydroxypropoxy)vitaminD3	Sterol_Lipids	-10.1	0
335	LMST04010130	-	Sterol_Lipids	-10.1	0
336	LMST04030209	3alpha,7alpha,16alpha,24R-Tetrahydroxy-5beta-cholestan-26-oicacid	Sterol_Lipids	-10.1	0
337	ZINC000000000589	Pelubiprofen	World_NOT_FDA	-10.1	0
338	ZINC000000001219	coumestrol	Metab	-10.1	0
339	ZINC000000001682	Mepiprazole	World_NOT_FDA	-10.1	0
340	ZINC000000537791	amaryl	FDA	-10.1	0
341	ZINC000000537964	mefloquine	FDA	-10.1	0
342	ZINC000000599734	lansoprazole	FDA	-10.1	0
343	ZINC000000643114	indapamide	FDA	-10.1	0
344	ZINC000000839083	Hydroxylansoprazole	World_NOT_FDA	-10.1	0		DUP	DUP
345	ZINC000000895662	phaseollidin	Metab	-10.1	0
346	ZINC000001530579	coreg	FDA	-10.1	0
347	ZINC000001587150	moschamine	Metab	-10.1	0
348	ZINC000001620282	(-)-maackiain	Metab	-10.1	0
349	ZINC000001711822	(+)-sugiol	Metab	-10.1	0
350	ZINC000001711823	(+)-sugiol	Metab	-10.1	0
351	ZINC000001711824	(+)-sugiol	Metab	-10.1	0
352	ZINC000001853205	mavik	FDA	-10.1	0
353	ZINC000002526389	5&#39	World_NOT_FDA	-10.1	0
354	ZINC000002528509	4&#39	World_NOT_FDA	-10.1	0		DUP	DUP
355	ZINC000002559943	Ifenprodil	World_NOT_FDA	-10.1	0
356	ZINC000003821675	Pa824	World_NOT_FDA	-10.1	0
357	ZINC000003822702	Bilastine	World_NOT_FDA	-10.1	0
358	ZINC000003833821	prdl	FDA	-10.1	0
359	ZINC000003833824	Aldocorten	World_NOT_FDA	-10.1	0
360	ZINC000003842872	Fimasartan	World_NOT_FDA	-10.1	0
361	ZINC000003869369	h2pte	Metab	-10.1	0
362	ZINC000004095859	Tocopherol	World_NOT_FDA	-10.1	0
363	ZINC000004098363	6-prenylnaringenin	Metab	-10.1	0
364	ZINC000004214767		World_NOT_FDA	-10.1	0
365	ZINC000004654845	3-hexaprenyl-4-hydroxybenzoate	Metab	-10.1	0
366	ZINC000004787206		Metab	-10.1	0
367	ZINC000005138848		World_NOT_FDA	-10.1	0
368	ZINC000005273905	trp-phe	Metab	-10.1	0
369	ZINC000006067916	TestosteroneSulfate	World_NOT_FDA	-10.1	0
370	ZINC000008844373	ononin?	Metab	-10.1	0
371	ZINC000009133172	Hydroxylansoprazole	World_NOT_FDA	-10.1	0		DUP	DUP
372	ZINC000012461841	Gliclazide	World_NOT_FDA	-10.1	0
373	ZINC000013334444		Metab	-10.1	0
374	ZINC000013860547	uralenol	Metab	-10.1	0
375	ZINC000014612909	neogrifolin	Metab	-10.1	0
376	ZINC000014689153	(s)-rutaretin	Metab	-10.1	0
377	ZINC000014719992	methuyltanshinonate	Metab	-10.1	0
378	ZINC000014947781	cubebin	Metab	-10.1	0
379	ZINC000018516586	delavirdine	FDA	-10.1	0
380	ZINC000019362722	Eprazinone	World_NOT_FDA	-10.1	0
381	ZINC000019796082	Minaprine	World_NOT_FDA	-10.1	0
382	ZINC000022058370	equol7-o-glucuronide	Metab	-10.1	0
383	ZINC000033816043	trans-resveratrol4'-o-glucuronide	Metab	-10.1	0
384	ZINC000035780505		Metab	-10.1	0
385	ZINC000043131420	Fostamatinib	World_NOT_FDA	-10.1	0
386	ZINC000043206271	Tafamidis	World_NOT_FDA	-10.1	0
387	ZINC000045789238	naringenin-4'-o-glucuronide	Metab	-10.1	0
388	ZINC000068202099	erismodegib	FDA	-10.1	0
389	ZINC000085879707		Metab	-10.1	0
390	ZINC000095620855	naringenin-4'-o-glucuronide	Metab	-10.1	0
391	ZINC000100015048	dn-102	Metab, FDA	-10.1	0
392	ZINC000100074252	sofosbuvir	FDA	-10.1	0
393	ZINC000100777501		Metab	-10.1	0
394	ZINC000255250104		Metab	-10.1	0
395	ZINC000256497801		Metab	-10.1	0
	C) 6DK1 ligands (1717)
				Ecalc
	Database ID	Compound name	Category	5HK1	6DK1
1	ZINC000008234226	Smilagenin(isosarsapogenin)	Metab	0	-13.1
2	LMST01080043	Epidiosgenin	Sterols	0	-13
3	LMST03020116	(23R,25S)-25-hydroxyvitaminD326,23-lactone/(23R,25S)-25-hydroxycholecalciferol26,23-lactone	Sterol_Lipids	0	-13
4	ZINC000008234190	withanolideD	Metab	0	-12.8
5	LMST01010394	Masticadienonicacid	Chol, Sterols	0	-12.6
6	LMST01010404	EndertiinA	Chol, Sterols	0	-12.6
7	LMST01010407	GanodecaloneB	Chol, Sterols	0	-12.6
8	LMST01031084	Dehydroconicasterol	Erg, Sterols	0	-12.6
9	ZINC000044306907	WithanolideA	Metab	0	-12.5
10	LMST01031083	Conicasterol	Erg, Sterols	0	-12.4
11	LMST03020141	4,4-difluoro-1alpha,25-dihydroxyvitaminD3/4,4-difluoro-1alpha,25-dihydroxycholecalciferol	Sterol_Lipids	0	-12.4
12	LMST03020585	1alpha-hydroxy-18-(4-hydroxy-4-methylpentyloxy)-23,24,25,26,27-pentanorvitaminD3/1alpha-hydroxy-18-(4-hydroxy-4-methylpentyloxy)-23,24,25,26,27-pentanorcholecalciferol	Sterol_Lipids	0	-12.4
13	LMST04010331	-	Sterol_Lipids	0	-12.3
14	ZINC000038600322	3'-Hydroxystanazolol	Metab	0	-12.3
15	LMST01060000	Gorgostaneskeleton	Sterols	0	-12.2
16	LMST01130040	1Î²,3Î²,5Î²,14Î²,16Î²-pentahydroxy-bufa-20,22-dienolide	Sterols	0	-12.2
17	LMST03020188	(22E)-(24R)-1alpha,24,25-trihydroxy-22,23-didehydrovitaminD3/(22E)-(24R)-1alpha,24,25-trihydroxy-22,23-didehydrocholecalciferol	Sterol_Lipids	0	-12.2
18	ZINC000004098868	Cyclopamine	Metab	0	-12.2
19	LMST01010168	Zymosterone	Chol, Sterols	0	-12.1
20	LMST01010468	7alpha-hydroxy-Desmosterol	Chol, Sterols	0	-12.1
21	LMST01060009	22S,23S-methylenecholesterol	Sterols	0	-12.1
22	LMST01130044	-	Sterols	0	-12.1
23	LMST01150013	Spirosolaneskeleton	Sterols	0	-12.1
24	LMST03020163	25-hydroxy-24-oxovitaminD3/25-hydroxy-24-oxocholecalciferol	Sterol_Lipids	0	-12.1
25	LMST01010406	GanodecaloneA	Chol, Sterols	0	-12
26	LMST01031111	NebrosteroidI	Erg, Sterols	0	-12
27	LMST01031178	-	Erg, Sterols	0	-12
28	LMST01130039	-	Sterols	0	-12
29	LMST03020210	(24R)-25-fluoro-1alpha,24-dihydroxyvitaminD3/(24R)-25-fluoro-1alpha,24-dihydroxycholecalciferol	Sterol_Lipids	0	-12
30	LMST03020271	(23S)-23,25-dihydroxyvitaminD3/(23S)-23,25-dihydroxycholecalciferol	Sterol_Lipids	0	-12
31	LMST01010189	3beta-hydroxy-4alpha-methyl-5alpha-cholest-7-ene-4beta-carboxylicacid	Chol, Sterols	0	-11.9
32	LMST01010271	3-oxo-7alpha-hydroxycholesterol	Chol, Sterols	0	-11.9
33	LMST01010337	NebrosteroidJ	Chol, Sterols	0	-11.9
34	LMST01010386	(24Z),26-hydroxydesmosterol	Chol, Sterols	0	-11.9
35	LMST01010395	(24E),26-hydroxydesmosterol	Chol, Sterols	0	-11.9
36	LMST01010405	EndertiinB	Chol, Sterols	0	-11.9
37	LMST01030113	-	Erg, Sterols	0	-11.9
38	LMST01030118	-	Erg, Sterols	0	-11.9
39	LMST01031110	-	Erg, Sterols	0	-11.9
40	LMST01080063	Isonarthogenin	Sterols	0	-11.9
41	LMST01080096	AsparacemosoneB	Sterols	0	-11.9
42	LMST01150004	Solasodine	Sterols	0	-11.9
43	LMST03010062	(24S)-1alpha,24-dihydroxyvitaminD2/(24S)-1alpha,24-dihydroxyergocalciferol	Sterol_Lipids	0	-11.9
44	LMST03020134	(5Z)-4,4-difluorovitaminD3/(5Z)-4,4-difluorocholecalciferol	Sterol_Lipids	0	-11.9
45	LMST03020447	(22E,24E)-1alpha,25-dihydroxy-26,27-dimethyl-22,23,24,24a-tetradehydro-24a-homovitaminD3/(22E,24E)-1alpha,25-dihydroxy-26,27-dimethyl-22,23,24,24a-tetradehydro-24a-homocholecalciferol	Sterol_Lipids	0	-11.9
46	LMST03020582	(20S)-20-cyclopropyl-1alpha,25-dihydroxy-16,17-didehydro-21-norvitaminD3/(20S)-20-cyclopropyl-1alpha,25-dihydroxy-16,17-didehydro-21-norcholecalciferol	Sterol_Lipids	0	-11.9
47	LMST04010390	-	Sterol_Lipids	0	-11.9
48	LMST04030123	-	Sterol_Lipids	0	-11.9
49	ZINC000001634550	mogoltadin	Metab	0	-11.9
50	ZINC000003022621	FarnesiferolA	Metab	0	-11.9
51	ZINC000003947419	mogoltadin	Metab	0	-11.9
52	ZINC000004097019	tetrahymanol	Metab	0	-11.9
53	ZINC000014449640	mogoltadin	Metab	0	-11.9
54	LMST01010017	Lanosterol	Chol, Sterols	0	-11.8
55	LMST01010097	-	Chol, Sterols	0	-11.8
56	LMST01010208	4alpha-methyl-5alpha-cholest-7-en-3-one	Chol, Sterols	0	-11.8
57	LMST01010350	5,20(22)-cholestadienol	Chol, Sterols	0	-11.8
58	LMST01010392	GanodericacidB	Chol, Sterols	0	-11.8
59	LMST01040136	Peposterol	Sterols	0	-11.8
60	LMST01080093	9(11)-dehydroxyhecogenin	Sterols	0	-11.8
61	LMST01160014	PhysalolactoneC	Sterols	0	-11.8
62	LMST03020144	24,24-difluoro-1alpha,25-dihydroxyvitaminD3/24,24-difluoro-1alpha,25-dihydroxycholecalciferol	Sterol_Lipids	0	-11.8
63	LMST03020164	25-hydroxy-1-oxo-3-epiprevitaminD3/25-hydroxy-1-oxo-3-epiprecholecalciferol	Sterol_Lipids	0	-11.8
64	LMST03020243	(24R)-24-hydroxyvitaminD3/(24R)-24-hydroxycholecalciferol	Sterol_Lipids	0	-11.8
65	LMST03020269	(22S)-22,25-dihydroxyvitaminD3/(22S)-22,25-dihydroxycholecalciferol	Sterol_Lipids	0	-11.8
66	LMST03020274	(25R)-25,26-dihydroxyvitaminD3/(25R)-25,26-dihydroxycholecalciferol	Sterol_Lipids	0	-11.8
67	LMST03020297	(23S)-23,24,25-trihydroxyvitaminD3/(23S)-23,24,25-trihydroxycholecalciferol	Sterol_Lipids	0	-11.8
68	LMST03020352	2alpha-methyl-3-epi-1beta,25-dihydroxyvitaminD3/2alpha-methyl-3-epi-1beta,25-dihydroxycholecalciferol	Sterol_Lipids	0	-11.8
69	LMST03020672	25-Hydroxy-6,19-dihydro-6,19-ethanovitaminD3	Sterol_Lipids	0	-11.8
70	LMST04010259	-	Sterol_Lipids	0	-11.8
71	LMST04030170	7alpha,12alpha,24-trihydroxycholest-4-en-3-one	Sterol_Lipids	0	-11.8
72	ZINC000000577115	Xaliproden	World_NOT_FDA	0	-11.8
73	ZINC000004081322	farnesiferola	Metab	0	-11.8
74	ZINC000004096448	Fecosterol	Metab	0	-11.8
75	ZINC000005761088	dehydroergosterol	Metab	0	-11.8
76	ZINC000020470285	FarnesiferolA	Metab	0	-11.8
77	ZINC000033949373	16b-oh-stanozolol	Metab	0	-11.8
78	ZINC000040164281	Coprocholicacid	Metab	0	-11.8
79	ZINC000257531044	GanoderalA	Metab	0	-11.8
80	ZINC000257531045	GanoderalA	Metab	0	-11.8
81	LMST01010204	3beta-hydroxy-4beta-methyl-5alpha-cholest-7-ene-4alpha-carbaldehyde	Chol, Sterols	0	-11.7
82	LMST01010338	NebrosteroidK	Chol, Sterols	0	-11.7
83	LMST01060035	KlyflaccisteroidC	Sterol_Lipids	0	-11.7
84	LMST03010012	(24S)-24-fluoro-1alpha,25-dihydroxyvitaminD2/(24S)-24-fluoro-1alpha,25-dihydroxyergocalciferol	Sterol_Lipids	0	-11.7
85	LMST03010050	(24R)-24,26-dihydroxyvitaminD2/(24R)-24,26-dihydroxyergocalciferol	Sterol_Lipids	0	-11.7
86	LMST03020086	26,26,26,27,27,27-hexafluoro-25-hydroxyvitaminD3/26,26,26,27,27,27-hexafluoro-25-hydroxycholecalciferol	Sterol_Lipids	0	-11.7
87	LMST03020122	(23S,25R)-1alpha,25-dihydroxyvitaminD326,23-lactone/(23S,25R)-1alpha,25-dihydroxycholecalciferol26,23-lactone	Sterol_Lipids	0	-11.7
88	LMST03020123	(23R,25S)-1alpha,25-dihydroxyvitaminD326,23-lactone/(23R,25S)-1alpha,25-dihydroxycholecalciferol26,23-lactone	Sterol_Lipids	0	-11.7
89	LMST03020167	(22E)-(24R)-1alpha,24-dihydroxy-22,23-didehydrovitaminD3/(22E)-(24R)-1alpha,24-dihydroxy-22,23-didehydrocholecalciferol	Sterol_Lipids	0	-11.7
90	LMST03020193	(23R)-1alpha,23,25-trihydroxy-24-oxovitaminD3/(23R)-1alpha,23,25-trihydroxy-24-oxocholecalciferol	Sterol_Lipids	0	-11.7
91	LMST03020246	25-hydroxy-14-epivitaminD3/25-hydroxy-14-epicholecalciferol	Sterol_Lipids	0	-11.7
92	LMST03020312	calicoferolD	Sterol_Lipids	0	-11.7
93	LMST03020409	18-acetoxy-25-hydroxyvitaminD3/18-acetoxy-25-hydroxycholecalciferol	Sterol_Lipids	0	-11.7
94	LMST03020494	26,27-diethyl-1alpha,25-dihydroxy-20,21-methano-23-oxavitaminD3/26,27-diethyl-1alpha,25-dihydroxy-20,21-methano-23-oxacholecalciferol	Sterol_Lipids	0	-11.7
95	LMST03020602	2beta-methoxy-1alpha,25-dihydroxyvitaminD3	Sterol_Lipids	0	-11.7
96	LMST03020638	16-Dehydroepicalcitriol	Sterol_Lipids	0	-11.7
97	LMST03020639	VD2716	Sterol_Lipids	0	-11.7
98	LMST03020667	1,25-Dihydroxy-23-oxo-vitaminD3	Sterol_Lipids	0	-11.7
99	LMST04010342	-	Sterol_Lipids	0	-11.7
100	LMST04010377	-	Sterol_Lipids	0	-11.7
101	LMST05010055	Dehydroisoandrosterone3-glucuronide	Androgens, Steroids, Sterol_Lipids	0	-11.7
102	ZINC000013512290	7alpha-Hydroxy-3-oxo-4-cholestenoate	Metab	0	-11.7
103	ZINC000040164282	Coprocholicacid	Metab	0	-11.7
104	ZINC000040165249		World_NOT_FDA	0	-11.7
105	ZINC000204073689	Vorapaxar	FDA	0	-11.7
106	ZINC000253609461	Dihydrobrassicasterol	Metab	0	-11.7
107	ZINC000257373529	Ganodermanondiol	Metab	0	-11.7
108	LMST01010006	7alpha-hydroxy-cholesterol(d7)	Chol, Sterols	0	-11.6
109	LMST01010013	7alpha-hydroxy-cholesterol	Chol, Sterols	0	-11.6
110	LMST01010247	Lumisterol3	Chol, Sterols	0	-11.6
111	LMST01010358	EnP(5,8)	Chol, Sterols	0	-11.6
112	LMST01010403	Pentalinonside	Chol, Sterols	0	-11.6
113	LMST01010463	7alpha,(25R)26-Dihydroxycholest-4-en-3-one	Chol, Sterols	0	-11.6
114	LMST01020123	Sitosteryl3E-pentenoate	Sterols	0	-11.6
115	LMST01040170	Sutinasterol	Sterols	0	-11.6
116	LMST01040180	Theonellasterol	Sterols	0	-11.6
117	LMST01040194	-	Sterols	0	-11.6
118	LMST01060001	Gorgosterol	Sterols	0	-11.6
119	LMST01080014	Hecogenin	Sterols	0	-11.6
120	LMST01080037	Diosgenin	Sterols	0	-11.6
121	LMST01080044	Epiruscogenin	Sterols	0	-11.6
122	LMST01080095	AsparacemosoneA	Sterols	0	-11.6
123	LMST01100034	GalaxaurolA	Sterol_Lipids	0	-11.6
124	LMST01130060	BovogeninA	Sterols	0	-11.6
125	LMST01150002	soladulcidine	Sterols	0	-11.6
126	LMST03020208	1alpha-fluoro-25-hydrovitaminD3/1alpha-fluoro-25-hydrocholecalciferol	Sterol_Lipids	0	-11.6
127	LMST03020273	(24S)-24,25-dihydroxyvitaminD3/(24S)-24,25-dihydroxycholecalciferol	Sterol_Lipids	0	-11.6
128	LMST03020298	(23S,25R)-23,25,26-trihydroxyvitaminD3/(23S,25R)-23,25,26-trihydroxycholecalciferol	Sterol_Lipids	0	-11.6
129	LMST03020314	(22S)-1alpha,22,25-trihydroxy-23,24-tetradehydro-24a-homo-20-epivitaminD3/(22S)-1alpha,22,25-trihydroxy-23,24-tetradehydro-24a-homo-20-epicholecalciferol	Sterol_Lipids	0	-11.6
130	LMST03020346	1alpha,25-dihydroxy-8(14)a-homovitaminD3/1alpha,25-dihydroxy-8(14)a-homocholecalciferol	Sterol_Lipids	0	-11.6
131	LMST03020677	22-HydroxyvitaminD3	Sterol_Lipids	0	-11.6
132	LMST04010326	-	Sterol_Lipids	0	-11.6
133	LMST04010329	-	Sterol_Lipids	0	-11.6
134	LMST04010382	-	Sterol_Lipids	0	-11.6
135	LMST04030175	(20R)-17alpha,20-dihydroxycholesterol	Sterol_Lipids	0	-11.6
136	LMST04030180	(25R)-3alpha,7alpha,12alpha-trihydroxy-5alpha-cholestan-26-oicacid	Sterol_Lipids	0	-11.6
137	LMST04030216	(25R)-Delta(4)-dafachronicacid	Sterol_Lipids	0	-11.6
138	ZINC000013125765	semilicoisoflavoneb	Metab	0	-11.6
139	ZINC000013517910	glyceollidini	Metab	0	-11.6
140	ZINC000019203131	Biosone	World_NOT_FDA	0	-11.6
141	ZINC000101160855		World_NOT_FDA	0	-11.6
142	ZINC000198521225	Isocolumbin	Metab	0	-11.6
143	ZINC000253636802		World_NOT_FDA	0	-11.6
144	ZINC000256078659	3-Hydroxystigmast-5-en-7-one	Metab	0	-11.6
145	ZINC000257536028	7-dehydrodesmosterol	Metab	0	-11.6
146	LMST01010008	7beta-hydroxy-cholesterol(d7)	Chol, Sterols	0	-11.5
147	LMST01010054	22-hydroxycholesterol	Chol, Sterols	0	-11.5
148	LMST01010088	27-hydroxy-cholesterol(25R)	Chol, Sterols	0	-11.5
149	LMST01010100	Dormatinone	Chol, Sterols	0	-11.5
150	LMST01010345	22S-hydroxycholesterol	Chol, Sterols	0	-11.5
151	LMST01010465	7alpha,(25S)26-Dihydroxycholest-4-en-3-one	Chol, Sterols	0	-11.5
152	LMST01030117	stellasterol	Erg, Sterols	0	-11.5
153	LMST01030141	-	Erg, Sterols	0	-11.5
154	LMST01031087	ConicasterolD	Erg, Sterols	0	-11.5
155	LMST01031191	-	Erg, Sterols	0	-11.5
156	LMST01031192	-	Erg, Sterols	0	-11.5
157	LMST01031215	-	Erg, Sterol_Lipids	0	-11.5
158	LMST01080011	Yuccagenin	Sterols	0	-11.5
159	LMST01110018	-	Sterols	0	-11.5
160	LMST01130062	19-carboxy-19-demethyltelocinobufagin	Sterols	0	-11.5
161	LMST03010059	1alpha,25-dihydroxy-24-methylvitaminD2/1alpha,25-dihydroxy-24-methylergocalciferol	Sterol_Lipids	0	-11.5
162	LMST03020064	(20S)-1alpha,20,25-trihydroxy-24-norvitaminD3/(20S)-1alpha,20,25-trihydroxy-24-norcholecalciferol	Sterol_Lipids	0	-11.5
163	LMST03020162	25-hydroxy-23-oxovitaminD3/25-hydroxy-23-oxocholecalciferol	Sterol_Lipids	0	-11.5
164	LMST03020187	(23S,25R)-25-hydroxyvitaminD326,23-lactol/(23S,25R)-25-hydroxycholecalciferol26,23-lactol	Sterol_Lipids	0	-11.5
165	LMST03020195	2alpha-chloro-1beta,25-dihydroxyvitaminD3/2alpha-chloro-1beta,25-dihydroxycholecalciferol	Sterol_Lipids	0	-11.5
166	LMST03020270	(23R)-23,25-dihydroxyvitaminD3/(23R)-23,25-dihydroxycholecalciferol	Sterol_Lipids	0	-11.5
167	LMST03020292	(24S)-1alpha,24,25-trihydroxyvitaminD3/(24S)-1alpha,24,25-trihydroxycholecalciferol	Sterol_Lipids	0	-11.5
168	LMST03020367	1alpha,25-dihydroxy-24a-homo-20-epivitaminD3/1alpha,25-dihydroxy-24a-homo-20-epicholecalciferol	Sterol_Lipids	0	-11.5
169	LMST03020403	18-acetoxy-vitaminD3/18-acetoxy-cholecalciferol	Sterol_Lipids	0	-11.5
170	LMST03020534	1alpha,25-dihydroxy-11-(4-hydroxymethylphenyl)-9,11-didehydrovitaminD3/1alpha,25-dihydroxy-11-(4-hydroxymethylphenyl)-9,11-didehydrocholecalciferol	Sterol_Lipids	0	-11.5
171	LMST03020676	3-Deoxy-3-azido-25-hydroxyvitaminD3	Sterol_Lipids	0	-11.5
172	LMST03060003	KH1049	Sterol_Lipids	0	-11.5
173	LMST04010143	-	Sterol_Lipids	0	-11.5
174	LMST04010164	-	Sterol_Lipids	0	-11.5
175	LMST04010176	-	Sterol_Lipids	0	-11.5
176	LMST04010178	-	Sterol_Lipids	0	-11.5
177	LMST04010195	-	Sterol_Lipids	0	-11.5
178	LMST04010387	-	Sterol_Lipids	0	-11.5
179	LMST04030112	-	Sterol_Lipids	0	-11.5
180	LMST04030157	7alpha,12alpha,26-trihydroxycholest-4-en-3-one	Sterol_Lipids	0	-11.5
181	LMST04030241	7alpha-hydroxy-3-oxo-4-cholestenoicacid	Sterol_Lipids	0	-11.5
182	ZINC000002559460	Î²-Sitosterol	Metab	0	-11.5
183	ZINC000003876073	desmosterol	Metab	0	-11.5
184	ZINC000004096817	estradiolglucuronide	Metab	0	-11.5
185	ZINC000036434727	LevistolideA	Metab	0	-11.5
186	ZINC000040164531	20a,22b-Dihydroxycholesterol	Metab	0	-11.5
187	ZINC000095618008	Fucosterol	Metab	0	-11.5
188	ZINC000254507524	Ergosterolperoxide	Metab	0	-11.5
189	ZINC000256403004	Isocolumbin	Metab	0	-11.5
190	ZINC000256518227	22-Dehydroclerosterol	Metab	0	-11.5
191	ZINC000256518822	22-Dehydroclerosterol	Metab	0	-11.5
192	ZINC000257491952	gamma-Taraxasterol	Metab	0	-11.5
193	ZINC000257536026	7-dehydrodesmosterol	Metab	0	-11.5
194	LMST01010143	-	Chol, Sterols	0	-11.4
195	LMST01010149	4,4-dimethylcholesta-8,11,24-trienol	Chol, Sterols	0	-11.4
196	LMST01010175	3beta-hydroxy-4beta-methyl-5alpha-cholest-7-ene-4alpha-carboxylicacid	Chol, Sterols	0	-11.4
197	LMST01010255	-	Chol, Sterols	0	-11.4
198	LMST01010462	7alpha,25(R)26-dihydroxycholesterol	Chol, Sterols	0	-11.4
199	LMST01031174	9,11-dehydroergosterolperoxide	Erg, Sterols	0	-11.4
200	LMST01040127	-	Sterols	0	-11.4
201	LMST01040133	Scottenol	Sterols	0	-11.4
202	LMST01040203	Corbisterol	Sterols	0	-11.4
203	LMST01040239	Porifersta-7,25(27)-dienol	Sterols	0	-11.4
204	LMST01060042	KlyflaccisteroidL	Sterol_Lipids	0	-11.4
205	LMST01080026	Yonogenin	Sterols	0	-11.4
206	LMST01080042	PrazerigeninA	Sterols	0	-11.4
207	LMST01080097	AsparacemosoneC	Sterols	0	-11.4
208	LMST01130053	Melianthugenin	Sterols	0	-11.4
209	LMST01130054	16beta-hydroxy-melianthugenin	Sterols	0	-11.4
210	LMST01160025	-	Sterols	0	-11.4
211	LMST02020103	Dehydroandrosterone	Androgens, Steroids, Sterol_Lipids	0	-11.4
212	LMST03020089	26,26,26,27,27,27-hexafluoro-1alpha,25-dihydroxyvitaminD3/26,26,26,27,27,27-hexafluoro-1alpha,25-dihydroxycholecalciferol	Sterol_Lipids	0	-11.4
213	LMST03020194	(23S)-1alpha,23,25-trihydroxy-24-oxovitaminD3/(23S)-1alpha,23,25-trihydroxy-24-oxocholecalciferol	Sterol_Lipids	0	-11.4
214	LMST03020205	(5E,10E)-19-fluoro-1alpha-hydroxyvitamin-D3/(5E,10E)-19-fluoro-1alpha-hydroxycholecalciferol	Sterol_Lipids	0	-11.4
215	LMST03020235	1beta-hydroxy-3-epivitaminD3/1beta-hydroxy-3-epicholecalciferol	Sterol_Lipids	0	-11.4
216	LMST03020272	(24R)-24,25-dihydroxyvitaminD3/(24R)-24,25-dihydroxycholecalciferol	Sterol_Lipids	0	-11.4
217	LMST03020316	(22E)-(25R)-25-hydroxy-26-methyl-22,23-didehydrovitaminD3/(22E)-(25R)-25-hydroxy-26-methyl-22,23-didehydrocholecalciferol	Sterol_Lipids	0	-11.4
218	LMST03020351	2beta-methyl-1beta,25-dihydroxyvitaminD3/2beta-methyl-1beta,25-dihydroxycholecalciferol	Sterol_Lipids	0	-11.4
219	LMST03020360	2alpha-methyl-3-epi-20-epi-1beta,25-dihydroxyvitaminD3/2alpha-methyl-3-epi-20-epi-1beta,25-dihydroxycholecalciferol	Sterol_Lipids	0	-11.4
220	LMST03020427	(20S)-1alpha,25-dihydroxy-20-methoxy-24a-homovitaminD3/(20S)-1alpha,25-dihydroxy-20-methoxy-24a-homocholecalciferol	Sterol_Lipids	0	-11.4
221	LMST03020595	(24aE)-1alpha,25-dihydroxy-24a,24b-didehydro-24a,24b-dihomovitaminD3/(24aE)-1alpha,25-dihydroxy-24a,24b-didehydro-24a,24b-dihomocholecalciferol	Sterol_Lipids	0	-11.4
222	LMST03020624	18-(3-Hydroxy-3-methylbutyl)-20-methyl-9,10-secopregna-5,7,10(19),20-tetraene-1,3-diol	Sterol_Lipids	0	-11.4
223	LMST03020640	VD2656	Sterol_Lipids	0	-11.4
224	LMST04010137	-	Sterol_Lipids	0	-11.4
225	LMST04010165	-	Sterol_Lipids	0	-11.4
226	LMST04010239	-	Sterol_Lipids	0	-11.4
227	LMST04010322	-	Sterol_Lipids	0	-11.4
228	LMST04010337	-	Sterol_Lipids	0	-11.4
229	LMST04010351	-	Sterol_Lipids	0	-11.4
230	LMST04010422	-	Sterol_Lipids	0	-11.4
231	LMST04030132	-	Sterol_Lipids	0	-11.4
232	LMST04030168	7alpha,24-dihydroxy-5beta-cholestan-3-one	Sterol_Lipids	0	-11.4
233	LMST04030169	7alpha,24-dihydroxycholest-4-en-3-one	Sterol_Lipids	0	-11.4
234	LMST04030174	(24R)-7alpha,24-dihydroxycholesterol	Sterol_Lipids	0	-11.4
235	ZINC000002516840	lanol	Metab	0	-11.4
236	ZINC000003873364		World_NOT_FDA	0	-11.4
237	ZINC000003978003	Ergocalciferol(VitaminD2)	Metab	0	-11.4
238	ZINC000004096816	22b-hydroxycholesterol	Metab	0	-11.4
239	ZINC000004215039	myagen	Metab	0	-11.4
240	ZINC000004706381	fucostanol	Metab	0	-11.4
241	ZINC000015919406	Ono-Rs411	World_NOT_FDA	0	-11.4
242	ZINC000028967263	clerosterol	Metab	0	-11.4
243	ZINC000040164219	3alpha,7alpha-Dihydroxycoprostanicacid	Metab	0	-11.4
244	ZINC000253609460	Dihydrobrassicasterol	Metab	0	-11.4
245	ZINC000254682661	(5x,6x)-5,6-Epoxyergosta-7,22-dien-3-ol	Metab	0	-11.4
246	ZINC000257410709	Isomangiferolicacid	Metab	0	-11.4
247	LMST01010004	5,6alpha-epoxy-cholesterol(d7)	Chol, Sterols	0	-11.3
248	LMST01010011	5,6alpha-epoxy-cholesterol	Chol, Sterols	0	-11.3
249	LMST01010057	27-hydroxy-cholesterol	Chol, Sterols	0	-11.3
250	LMST01010310	20S-Hydroxycholest-4-en-3,16-dione	Chol, Sterols	0	-11.3
251	LMST01010384	5alpha,6alpha-24S,25-diepoxy-cholesterol	Chol, Sterols	0	-11.3
252	LMST01010393	GanosporericacidA	Chol, Sterols	0	-11.3
253	LMST01010413	GanoweberianicacidA	Chol, Sterols	0	-11.3
254	LMST01010466	7alpha,25(S)26-dihydroxycholesterol	Chol, Sterols	0	-11.3
255	LMST01031068	-	Erg, Sterols	0	-11.3
256	LMST01031086	ConicasterolC	Erg, Sterols	0	-11.3
257	LMST01031099	StoloniferoneN	Erg, Sterols	0	-11.3
258	LMST01031175	Ergosterolperoxide	Erg, Sterols	0	-11.3
259	LMST01040275	7alpha-Theonellasterol	Sterols	0	-11.3
260	LMST01060032	Gorgostan-5,25-dien-3beta-ol	Sterols	0	-11.3
261	LMST01060038	-	Sterol_Lipids	0	-11.3
262	LMST01080009	Tigogenin	Sterols	0	-11.3
263	LMST01080010	Gitogenin	Sterols	0	-11.3
264	LMST01080027	Tokorogenin	Sterols	0	-11.3
265	LMST01090001	Nuatigenin	Sterols	0	-11.3
266	LMST01150005	tomatidinol	Sterols	0	-11.3
267	LMST02030121	Hydrocortisonecypionate	Steroids, Sterol_Lipids	0	-11.3
268	LMST03020034	(22E,24E)-1alpha,26-dihydroxy-22,23,24,25-tetradehydro-27-norvitaminD3/(22E,24E)-1alpha,26-dihydroxy-22,23,24,25-tetradehydro-27-norcholecalciferol	Sterol_Lipids	0	-11.3
269	LMST03020039	1alpha,25-dihydroxy-24-oxo-22-oxavitaminD3/1alpha,25-dihydroxy-24-oxo-22-oxacholecalciferol	Sterol_Lipids	0	-11.3
270	LMST03020052	(5Z)-(3S)-1alpha,25-dihydroxy-3-deoxy-3-thiavitaminD33-oxide/(5Z)-(3S)-1alpha,25-dihydroxy-3-deoxy-3-thiacholecalciferol3-oxide	Sterol_Lipids	0	-11.3
271	LMST03020102	25-hydroxy-23,23,24,24-tetradehydrovitaminD3/25-hydroxy-23,23,24,24-tetradehydrocholecalciferol	Sterol_Lipids	0	-11.3
272	LMST03020114	(22E,24E)-1alpha,26a-dihydroxy-22,23,24,25-tetradehydro-26a-homo-27-norvitaminD3/(22E,24E)-1alpha,26a-dihydroxy-22,23,24,25-tetradehydro-26a-homo-27-norcholecalciferol	Sterol_Lipids	0	-11.3
273	LMST03020196	6-fluorovitaminD3/6-fluorocholecalciferol	Sterol_Lipids	0	-11.3
274	LMST03020268	(22R)-22,25-dihydroxyvitaminD3/(22R)-22,25-dihydroxycholecalciferol	Sterol_Lipids	0	-11.3
275	LMST03020322	(22E)-(25R)-1alpha,25-dihydroxy-26-methyl-22,23-didehydrovitaminD3/(22E)-(25R)-1alpha,25-dihydroxy-26-methyl-22,23-didehydrocholecalciferol	Sterol_Lipids	0	-11.3
276	LMST03020344	1alpha,25-dihydroxy-1beta-methylvitaminD3/1alpha,25-dihydroxy-1beta-methylcholecalciferol	Sterol_Lipids	0	-11.3
277	LMST03020354	2alpha-methyl-20-epi-1alpha,25-dihydroxyvitaminD3/2alpha-methyl-20-epi-1alpha,25-dihydroxycholecalciferol	Sterol_Lipids	0	-11.3
278	LMST03020364	1alpha,25-dihydroxy-18-methylvitaminD3/1alpha,25-dihydroxy-18-methylcholecalciferol	Sterol_Lipids	0	-11.3
279	LMST03020401	24,24-difluoro-1alpha,25-dihydroxy-26,27-dimethylvitaminD3/24,24-difluoro-1alpha,25-dihydroxy-26,27-dimethylcholecalciferol	Sterol_Lipids	0	-11.3
280	LMST03020410	1alpha,25-dihydroxy-11alpha-[(1R)-oxiranyl]vitaminD3/1alpha,25-dihydroxy-11alpha-[(1R)-oxiranyl]cholecalciferol	Sterol_Lipids	0	-11.3
281	LMST03020441	toxisterol3B2/(5E)-(10S)-10-ethoxy-10,19-dihydrovitaminD3/(5E)-(10S)-10-ethoxy-10,19-dihydrocholecalciferol	Sterol_Lipids	0	-11.3
282	LMST03020594	(24E)-1alpha,25-dihydroxy-24,24a-didehydro-24a,24b-dihomovitaminD3/(24E)-1alpha,25-dihydroxy-24,24a-didehydro-24a,24b-dihomocholecalciferol	Sterol_Lipids	0	-11.3
283	LMST03020596	(10S)-1alpha,19,25-trihydroxy-10,19-dihydrovitaminD3/(10S)-1alpha,19,25-trihydroxy-10,19-dihydrocholecalciferol	Sterol_Lipids	0	-11.3
284	LMST03020623	25-Hydroxy[26,27-methyl]vitaminD33beta-(1,2-epoxypropyl)ether	Sterol_Lipids	0	-11.3
285	LMST04010132	-	Sterol_Lipids	0	-11.3
286	LMST04010194	-	Sterol_Lipids	0	-11.3
287	LMST04010210	-	Sterol_Lipids	0	-11.3
288	LMST04010234	-	Sterol_Lipids	0	-11.3
289	LMST04010354	-	Sterol_Lipids	0	-11.3
290	LMST04010366	-	Sterol_Lipids	0	-11.3
291	LMST04010388	-	Sterol_Lipids	0	-11.3
292	LMST04010394	-	Sterol_Lipids	0	-11.3
293	LMST04010436	-	Sterol_Lipids	0	-11.3
294	LMST04030236	7beta,25-dihydroxy-cholestenoicacid	Sterol_Lipids	0	-11.3
295	ZINC000003881640	megace	FDA	0	-11.3
296	ZINC000004098734	rotenolone	Metab	0	-11.3
297	ZINC000008217100	3a,7a,12a-Trihydroxy-5b-cholestan-26-al	Metab	0	-11.3
298	ZINC000013512293	7alpha-Hydroxy-3-oxo-4-cholestenoate	Metab	0	-11.3
299	ZINC000033830831	isodiospyrin	Metab	0	-11.3
300	ZINC000034944434	silandrin	Metab	0	-11.3
301	ZINC000040164193	Glycocholicacid	Metab	0	-11.3
302	ZINC000056874535	7alpha,24-dihydroxy-4-cholesten-3-one	Metab	0	-11.3
303	ZINC000100038169	Isosilybin	Metab	0	-11.3
304	ZINC000118912516		World_NOT_FDA	0	-11.3
305	ZINC000230075702	silandrin	Metab	0	-11.3
306	ZINC000253616931		World_NOT_FDA	0	-11.3
307	ZINC000254685395	3beta-3-Lupanol	Metab	0	-11.3
308	ZINC000256427308	Clerosterol	Metab	0	-11.3
309	LMST01010142	-	Chol, Sterols	0	-11.2
310	LMST01010190	lanostane	Chol, Sterols	0	-11.2
311	LMST01010222	32-oxolanosterol	Chol, Sterols	0	-11.2
312	LMST01010249	-	Chol, Sterols	0	-11.2
313	LMST01010295	-	Chol, Sterols	0	-11.2
314	LMST01010307	20S-Hydroxycholestane-3,16-dione	Chol, Sterols	0	-11.2
315	LMST01010360	Cholesterol-5beta-hydroperoxide	Chol, Sterols	0	-11.2
316	LMST01010391	GanodericacidA	Chol, Sterols	0	-11.2
317	LMST01010449	25-Hydroxy-7-oxocholesterol	Chol, Sterols	0	-11.2
318	LMST01031074	-	Erg, Sterols	0	-11.2
319	LMST01031125	22,23-dihydroxycampesterol	Erg, Sterols	0	-11.2
320	LMST01031151	DaturmetesideC	Erg, Sterols	0	-11.2
321	LMST01031163	ArmatinolA	Erg, Sterols	0	-11.2
322	LMST01040187	TheonellasterolH	Sterols	0	-11.2
323	LMST01040192	NorselicacidD	Sterols	0	-11.2
324	LMST01050012	24-Ethyl-24-methyl-22E-dehydrocholesterol	Sterols	0	-11.2
325	LMST01060015	StoloniferoneM	Sterols	0	-11.2
[truncated: 1,392 more rows]
