# Supplementary material for: Investigation of the Entry Pathway and Molecular Nature of σ1 Receptor Ligands
Source: Int J Mol Sci. 2023 Mar 28;24(7):6367. doi: 10.3390/ijms24076367 (PMC10094450; doi:10.3390/ijms24076367)
Supplement: Supplementary file 1 [file ijms-24-06367-s001.zip › Supplementary-Table-S4_VS-ERG2.xlsx]

## Sheet: ERG2
	Database ID	Compound name	Category	Ecalc	HB	CL	Contacts				World_Not_FDA	Metab	FDA	ErgP	Sterols	Agonists-Antagonists	CholP	Sterol_Lipids	Steroids	Androgens	DeltaL	Estrogens
1	ZINC000004098742	Phaseolinisoflavan	Metab	-11.7	1	0	48				0	0	0	0	0	0	0	0	0	0	0	0
2	LMST01010311	-	Chol$Sterols	-11.6	0	0	84				0	0	0	0	0	0	0	0	0	0	0	0
3	LMST01160005	Minabeolide-4	Sterols	-11.5	0	2	92
4	ZINC000005845767		Metab	-11.5	0	1	69
5	ZINC000001634347		Metab	-11.5	0	1	70
6	ZINC000116473771		FDA	-11.4	0	2	63
7	ZINC000000000655		FDA	-11.4	0	0	44
8	ZINC000103105084		FDA	-11.4	2	0	52
9	ZINC000000000706		Metab	-11.3	0	1	48
10	ZINC000006206699		Metab	-11.3	0	2	62
11	LMST04010296	-	Sterol_Lipids	-11.2	1	1	76
12	ZINC000001634344		Metab	-11.2	0	1	60
13	ZINC000003872931		FDA	-11.2	0	1	88
14	ZINC000004028456		Metab	-11.1	1	3	70
15	LMST02020074	Testosterone cypionate	Androgens$Steroids$Sterol_Lipids	-11.1	0	1	95
16	LMST04010134	-	Sterol_Lipids	-11.1	1	0	79
17	ZINC000002187519		Metab	-11.1	0	3	76
18	LMST04010442	chola-4,6-dien-24-oic acid	Sterol_Lipids	-11.1	0	0	67
19	ZINC000005845755		Metab	-11	0	2	66
20	ZINC000005260601		Metab	-11	2	0	63
21	LMST04010129	-	Sterol_Lipids	-11	0	0	75
22	ZINC000000643203		Metab	-11	3	0	66
23	ZINC000014719978		Metab	-11	0	1	40
24	ZINC000003824121		Metab	-11	0	1	92
25	ZINC000003984116		Metab	-11	0	2	43
26	ZINC000033830297		Metab	-11	0	3	76
27	ZINC000002101853		Metab	-11	1	3	77
28	ZINC000002146627		Metab	-11	1	3	72
29	ZINC000005260602		Metab	-11	2	0	65
30	ZINC000004027981		Metab	-11	1	3	74
31	LMST02030095	4,5beta-Dihydrocortisone	Estrogens$Steroids$Sterol_Lipids	-11	3	1	57
32	LMST04010259	-	Sterol_Lipids	-10.9	1	0	76
33	LMST01160002	Minabeolide-1	Sterols	-10.9	0	2	104
34	LMST04010146	-	Sterol_Lipids	-10.9	0	0	85
35	ZINC000006206700		Metab	-10.9	0	2	60
36	ZINC000013130928		Metab	-10.9	0	1	55
37	ZINC000095620870		Metab	-10.9	2	0	64
38	ZINC000013783866		Metab	-10.9	0	0	65
39	ZINC000005260598		Metab	-10.9	3	0	63
40	ZINC000015449241		Metab	-10.9	3	0	66
41	ZINC000014719976		Metab	-10.9	0	1	38
42	LMST04010265	-	Sterol_Lipids	-10.9	0	1	73
43	LMST01160007	Minabeolide-6	Sterols	-10.9	0	2	96
44	ZINC000000901095		Metab	-10.8	2	1	51
45	ZINC000001558484		Metab	-10.8	0	0	58
46	ZINC000148605973		Metab	-10.8	2	0	66
47	ZINC000148606103		Metab	-10.8	3	0	68
48	LMST01010168	Zymosterone	Chol$Sterols	-10.8	0	2	86
49	LMST02020119	Penicildione A	Androgens$Steroids$Sterol_Lipids	-10.8	0	1	48
50	ZINC000000897301		FDA	-10.8	1	0	50
51	ZINC000001668768		Metab	-10.8	0	1	58
52	ZINC000043458244		Metab	-10.8	0	1	58
53	ZINC000002557132		Metab	-10.8	0	1	58
54	LMST04010258	-	Sterol_Lipids	-10.8	1	0	72
55	ZINC000000002688		FDA	-10.8	0	0	50
56	ZINC000012375086		Metab	-10.8	0	1	58
57	ZINC000001615142		Metab	-10.8	0	0	35
58	ZINC000018037965		Metab	-10.8	0	1	58
59	ZINC000000899902		Metab	-10.8	1	0	54
60	ZINC000250744444		Metab	-10.8	0	0	67
61	LMST01010066	Zymosterol	Chol$Sterols	-10.8	0	0	87
62	LMST04010290	-	Sterol_Lipids	-10.8	1	0	70
63	LMST04010325	-	Sterol_Lipids	-10.8	0	0	62
64	LMST04010268	-	Sterol_Lipids	-10.8	0	1	82
65	ZINC000013783867		Metab	-10.8	4	1	72
66	ZINC000002561256		Metab	-10.8	1	0	39
67	LMST01010206	5alpha-cholesta-7,24-dien-3beta-ol	Chol$Sterols	-10.7	2	2	100
68	LMST04010267	-	Sterol_Lipids	-10.7	0	0	84
69	LMST02030182	16alpha-hydroxyprogesterone	Estrogens$Steroids$Sterol_Lipids	-10.7	2	0	54
70	LMST02010037	Quinestrol	Steroids$Sterol_Lipids	-10.7	0	2	81
71	LMST04010253	-	Sterol_Lipids	-10.7	0	2	86
72	ZINC000054991825		Metab	-10.7	1	2	74
73	LMST04010429	-	Sterol_Lipids	-10.7	0	0	64
74	LMST01160034	Paraminabeolide A	Sterols	-10.7	0	1	102
75	ZINC000000899797		Metab	-10.7	2	0	50
76	ZINC000003797541		FDA	-10.7	1	0	75
77	LMST05020032	Testosterone sulfate	Sterol_Lipids	-10.7	1	0	50
78	LMST04010234	-	Sterol_Lipids	-10.7	0	0	69
79	ZINC000000898340		Metab	-10.7	0	0	58
80	LMST01010334	-	Chol$Sterols	-10.7	1	1	90
81	LMST01010237	3-keto-4alpha-methyl-zymosterol	Chol$Sterols	-10.7	0	1	93
82	LMST05020010	Dehydroepiandrosterone sulfate	Sterol_Lipids	-10.7	1	1	54
83	LMST04010291	-	Sterol_Lipids	-10.7	3	1	80
84	LMST01010239	-	Chol$Sterols	-10.7	0	1	91
85	ZINC000004026533		Metab	-10.7	1	0	52
86	LMST01031155	Talarosterone	Erg$Sterols	-10.7	1	3	100
87	ZINC000013125765		Metab	-10.7	0	0	60
88	LMST01010363	-	Chol$Sterols	-10.7	1	1	98
89	ZINC000003876073		Metab	-10.6	1	2	93
90	LMST01010243	-	Chol$Sterols	-10.6	0	2	93
91	ZINC000004175630		FDA	-10.6	0	0	114
92	LMST04010281	-	Sterol_Lipids	-10.6	0	0	68
93	LMST02030204	Dihydrocortisol	Estrogens$Steroids$Sterol_Lipids	-10.6	2	0	61
94	LMST02030176	medroxyprogesterone	Estrogens$Steroids$Sterol_Lipids	-10.6	0	1	72
95	LMST01110004	(23R)-isocalysterol	Sterols	-10.6	1	3	117
96	LMST02030171	algestone	Estrogens$Steroids$Sterol_Lipids	-10.6	2	1	66
97	ZINC000000968157		Metab	-10.6	1	0	49
98	LMST02030161	17alpha-hydroxyprogesterone	Steroids$Sterol_Lipids	-10.6	0	0	55
99	LMST04010292	-	Sterol_Lipids	-10.6	2	0	86
100	LMST04010263	-	Sterol_Lipids	-10.6	0	2	67
101	LMST04010393	-	Sterol_Lipids	-10.6	1	0	68
102	LMST01130000	Bufanolide skeleton	Sterols	-10.6	0	0	71
103	LMST02020061	-	Androgens$Steroids$Sterol_Lipids	-10.6	0	1	49
104	LMST02020058	-	Androgens$Steroids$Sterol_Lipids	-10.6	0	1	48
105	LMST04010283	-	Sterol_Lipids	-10.6	0	0	76
106	ZINC000004098719		Metab	-10.6	1	0	52
107	LMST04010203	-	Sterol_Lipids	-10.6	2	0	75
108	ZINC000000968444		Metab	-10.6	0	2	62
109	ZINC000001537184		Metab	-10.6	0	0	35
110	LMST04010147	-	Sterol_Lipids	-10.6	1	0	82
111	ZINC000006018743		Metab	-10.6	3	0	39
112	LMST04010341	-	Sterol_Lipids	-10.6	1	2	81
113	ZINC000014778687		Metab	-10.6	0	0	40
114	LMST04010127	-	Sterol_Lipids	-10.6	1	1	68
115	ZINC000000057522		FDA	-10.6	2	0	43
116	LMST04010379	-	Sterol_Lipids	-10.6	1	0	64
117	ZINC000001886965		Metab	-10.6	0	2	63
118	LMST04010233	-	Sterol_Lipids	-10.5	1	0	74
119	LMST02030183	(20S)-17,20-dihydroxypregn-4-en-3-one	Steroids$Sterol_Lipids	-10.5	0	0	57
120	LMST04010289	-	Sterol_Lipids	-10.5	0	0	71
121	LMST02020083	3,17-dioxoandrost-4-en-19-al	Androgens$DeltaL$Steroids	-10.5	1	1	55
122	ZINC000257536026		Metab	-10.5	0	1	79
123	LMST04010340	-	Sterol_Lipids	-10.5	1	0	84
124	LMST01031026	-	Erg$Sterols	-10.5	0	1	102
125	LMST02030188	-	Estrogens$Steroids$Sterol_Lipids	-10.5	3	0	63
126	LMST04010154	-	Sterol_Lipids	-10.5	1	0	78
127	LMST02030147	Delta(1)-progesterone	DeltaL$Steroids$Sterol_Lipids	-10.5	0	0	50
128	LMST01031023	DehydroErgosterol	Erg$Sterols	-10.5	0	2	96
129	LMST04010397	-	Sterol_Lipids	-10.5	0	0	94
130	LMST01031192	-	Erg$Sterols	-10.5	0	3	102
131	LMST02030146	5beta-pregnane-3,20-dione	Steroids$Sterol_Lipids	-10.5	1	1	48
132	ZINC000000899109		Metab	-10.5	4	0	60
133	LMST04010406	-	Sterol_Lipids	-10.5	1	0	77
134	ZINC000004096806		Metab	-10.5	1	1	55
135	LMST04010333	-	Sterol_Lipids	-10.5	0	0	80
136	ZINC000003973334		FDA	-10.5	0	1	62
137	LMST02020084	testolactone	Androgens$DeltaL$Steroids	-10.5	0	1	46
138	ZINC000005758784		Metab	-10.5	0	1	78
139	LMST04010389	-	Sterol_Lipids	-10.5	0	0	89
140	LMST02030163	16,17-didehydroprogesterone	DeltaL$Steroids$Sterol_Lipids	-10.5	0	1	50
141	LMST04010153	-	Sterol_Lipids	-10.5	1	2	69
142	ZINC000004098608		Metab	-10.4	2	0	59
143	ZINC000001658458		Metab	-10.4	1	0	74
144	LMST01010317	22Z-dehydrocholesterol	Chol$Sterols	-10.4	1	3	105
145	ZINC000001550499		FDA	-10.4	1	1	65
146	ZINC000000001219		Metab	-10.4	0	0	29
147	LMST04010236	-	Sterol_Lipids	-10.4	0	0	73
148	ZINC000004096634		Metab	-10.4	1	2	57
149	ZINC000004731235		Metab	-10.4	0	0	74
150	ZINC000001532097		Metab	-10.4	2	0	100
151	LMST04010144	-	Sterol_Lipids	-10.4	0	0	64
152	LMST04010332	-	Sterol_Lipids	-10.4	0	1	69
153	ZINC000000704424		Metab	-10.4	0	0	74
154	ZINC000005158963		Metab	-10.4	2	0	56
155	ZINC000001850213		Metab	-10.4	2	0	39
156	LMST01031025	-	Erg$Sterols	-10.4	0	1	104
157	ZINC000052716421		FDA	-10.4	0	0	85
158	ZINC000001858796		Metab	-10.4	1	0	54
159	LMST01010085	-	Chol$Sterols	-10.4	0	1	94
160	LMST02020007	Androstenedione	Androgens$Steroids$Sterol_Lipids	-10.4	0	1	54
161	LMST02020076	Testosterone propionate	Androgens$Steroids$Sterol_Lipids	-10.4	0	0	54
162	LMST04010328	-	Sterol_Lipids	-10.4	0	0	77
163	ZINC000000004016		Metab	-10.4	0	0	41
164	LMST04010441	5beta-Cholanoic acid	Sterol_Lipids	-10.4	0	0	76
165	ZINC000004491418		Metab	-10.4	0	0	73
166	ZINC000002392256		Metab	-10.4	1	0	43
167	ZINC000004428529		FDA	-10.4	0	0	52
168	LMST04010297	-	Sterol_Lipids	-10.4	0	0	68
169	ZINC000012493944		Metab	-10.4	1	1	72
170	LMST04010360	-	Sterol_Lipids	-10.4	0	0	58
171	LMST04010407	-	Sterol_Lipids	-10.4	2	0	75
172	LMST04010432	-	Sterol_Lipids	-10.4	1	3	88
173	ZINC000006458015		Metab	-10.4	2	0	41
174	LMST02020057	Testosterone acetate	Androgens$Steroids$Sterol_Lipids	-10.4	0	0	52
175	LMST01031022	5-campestenone	Erg$Sterols	-10.4	0	2	105
176	ZINC000002019692		Metab	-10.4	1	1	52
177	ZINC000014658084		Metab	-10.4	1	1	63
178	ZINC000001706992		Metab	-10.4	2	0	52
179	LMST02030177	megestrol	Steroids$Sterol_Lipids	-10.4	0	0	48
180	LMST04010170	-	Sterol_Lipids	-10.4	0	0	85
181	ZINC000000704423		Metab	-10.4	0	2	74
182	ZINC000004491419		Metab	-10.4	0	0	73
183	LMST01010324	-	Chol$Sterols	-10.4	1	3	95
184	ZINC000013512486		Metab	-10.4	1	2	43
185	LMST04010376	-	Sterol_Lipids	-10.4	0	1	87
186	ZINC000000517458		Metab	-10.4	0	0	37
187	LMST04010159	-	Sterol_Lipids	-10.4	1	1	86
188	ZINC000014712185		Metab	-10.4	0	0	39
189	LMST02030210	-	Steroids$Sterol_Lipids	-10.4	1	1	43
190	LMST01010315	24-norcholesterol	Chol$Sterols	-10.3	1	1	97
191	ZINC000002019691		Metab	-10.3	1	1	51
192	ZINC000000897408		FDA	-10.3	1	1	65
193	ZINC000014712188		Metab	-10.3	0	0	36
194	LMST04010202	-	Sterol_Lipids	-10.3	1	1	69
195	ZINC000003875334		FDA	-10.3	0	2	83
196	CID_125328		Agonists-Antagonists	-10.3	0	0	51
197	ZINC000005158935		Metab	-10.3	1	0	71
198	ZINC000001445635		Metab	-10.3	0	1	73
199	ZINC000000518998		Metab	-10.3	0	0	54
200	ZINC000014610081		Metab	-10.3	0	1	57
201	ZINC000000704422		Metab	-10.3	0	1	72
202	LMST04010396	-	Sterol_Lipids	-10.3	0	1	66
203	LMST04010351	-	Sterol_Lipids	-10.3	1	2	65
204	LMST04010433	-	Sterol_Lipids	-10.3	1	0	74
205	LMST02030086	11-deoxycortisol	Estrogens$Steroids$Sterol_Lipids	-10.3	2	0	61
206	LMST04010266	-	Sterol_Lipids	-10.3	0	1	79
207	ZINC000257463480		Metab	-10.3	0	0	37
208	LMST01030095	Fecosterol	Erg$Sterols	-10.3	0	2	95
209	ZINC000001727527		Metab	-10.3	0	1	46
210	LMST02030159	progesterone	DeltaL$Steroids$Sterol_Lipids	-10.3	0	0	51
211	LMST03020313	calicoferol D	Sterol_Lipids	-10.3	0	1	109
212	ZINC000002556384		Metab	-10.3	1	0	40
213	ZINC000013449664		Metab	-10.3	0	0	43
214	ZINC000001858795		Metab	-10.3	1	0	54
215	ZINC000002019694		Metab	-10.3	1	1	49
216	ZINC000001489478		FDA	-10.3	1	0	61
217	LMST04010007	-	Sterol_Lipids	-10.3	0	0	89
218	ZINC000014610083		Metab	-10.3	0	1	58
219	LMST04010276	-	Sterol_Lipids	-10.3	1	0	80
220	ZINC000005167249		World_NOT_FDA	-10.3	2	1	71
221	LMST04010430	-	Sterol_Lipids	-10.3	1	0	82
222	ZINC000253597112		Metab	-10.3	1	1	54
223	ZINC000004099144		Metab	-10.3	1	2	89
224	LMST04010264	-	Sterol_Lipids	-10.3	0	1	68
225	ZINC000003876023		FDA	-10.3	1	1	80
226	ZINC000085205451		FDA	-10.3	0	0	63
227	LMST02030169	(20S)-20-hydroxypregn-4-en-3-one	Steroids$Sterol_Lipids	-10.3	0	0	52
228	ZINC000051951647		FDA	-10.3	1	0	65
229	ZINC000257463481		Metab	-10.3	0	0	36
230	LMST04030218	(25R)-Delta(7)-dafachronic acid	DeltaL$Sterol_Lipids	-10.3	0	0	101
231	ZINC000002019693		Metab	-10.3	2	1	52
232	LMST04030222	(25S)-Delta(7)-dafachronic acid	DeltaL$Sterol_Lipids	-10.3	0	0	106
233	ZINC000021981235		World_NOT_FDA	-10.3	1	0	48
234	LMST01010352	4-cholestenol	Chol$Sterols	-10.2	1	1	103
235	ZINC000000538453		Metab	-10.2	1	0	59
236	LMST02020021	Dehydroepiandrosterone	Androgens$Steroids$Sterol_Lipids	-10.2	2	1	43
237	ZINC000000002106		Metab	-10.2	1	0	42
238	LMST01010365	Zymostenol-d7	Chol$Sterols	-10.2	0	1	85
239	ZINC000012358849		Metab	-10.2	1	1	78
240	ZINC000007997966		FDA	-10.2	1	0	39
241	LMST04010437	-	Sterol_Lipids	-10.2	1	1	78
242	ZINC000000538564		FDA	-10.2	4	0	72
243	LMST04010130	-	Sterol_Lipids	-10.2	0	0	77
244	ZINC000014610053		Metab	-10.2	0	0	39
245	LMST04030213	-	Sterol_Lipids	-10.2	0	3	105
246	ZINC000253604821		Metab	-10.2	0	0	66
247	LMST04010016	-	Sterol_Lipids	-10.2	0	0	70
248	LMST01040244	5alpha-poriferastane	Sterols	-10.2	0	1	106
249	LMST01010096	Zymostenol	Chol$Sterols	-10.2	0	1	85
250	LMST01031090	Norselic acid C	Erg$Sterols	-10.2	1	1	88
251	LMST04060031	Bendigole B	Sterol_Lipids	-10.2	0	0	65
252	LMST01010242	8-Dehydrocholesterol	Chol$Sterols	-10.2	0	1	97
253	LMST02020087	11-Ketoetiocholanolone	Androgens$Steroids$Sterol_Lipids	-10.2	0	2	62
254	LMST01031016	campest-4-en-3beta-ol	Erg$Sterols	-10.2	1	1	103
255	LMST04010399	-	Sterol_Lipids	-10.2	0	2	79
256	LMST01010314	-	Chol$Sterols	-10.2	2	1	95
257	LMST01031049	Occelasterol	Erg$Sterols	-10.2	1	3	104
258	ZINC000000000347		FDA	-10.2	2	0	55
259	ZINC000006050189		Metab	-10.2	0	0	38
260	ZINC000030691679		FDA	-10.2	0	1	72
261	LMST01010081	Epicholesterol	Chol$Sterols	-10.2	0	3	98
262	ZINC000014762761		Metab	-10.2	2	0	73
263	ZINC000013130924		Metab	-10.2	3	0	58
264	LMST02020121	11betaOH-5alpha-androstanedione	Androgens$Steroids$Sterol_Lipids	-10.2	0	2	49
265	ZINC000005963549		Metab	-10.2	3	0	60
266	ZINC000001653271		Metab	-10.2	1	1	54
267	LMST02020066	11beta-Hydroxyandrostenedione	Androgens$Steroids$Sterol_Lipids	-10.2	0	1	47
268	LMST04010381	-	Sterol_Lipids	-10.2	1	1	74
269	LMST04030217	(25R)-Delta(4)-dafachronic acid	DeltaL$Sterol_Lipids	-10.2	0	2	99
270	ZINC000019796080		FDA	-10.2	1	0	78
271	LMST02030120	Cortisone acetate	Steroids$Sterol_Lipids	-10.2	0	2	80
272	LMST02030180	prednisone	Estrogens$Steroids$Sterol_Lipids	-10.2	2	1	62
273	ZINC000058581064		FDA	-10.2	1	0	74
274	LMST04050018	Bendigole A	Sterol_Lipids	-10.2	1	0	58
275	ZINC000005844788		FDA	-10.2	0	0	84
276	ZINC000014719992		Metab	-10.2	0	1	46
277	ZINC000006036223		Metab	-10.2	2	1	84
278	ZINC000003881614		Metab	-10.2	1	1	65
279	ZINC000000899892		Metab	-10.1	0	0	40
280	ZINC000253501117		Metab	-10.1	3	1	90
281	LMST02030151	17,20-dihydroxypregn-4-en-3-one	Estrogens$Steroids$Sterol_Lipids	-10.1	0	0	56
282	LMST01010236	-	Chol$Sterols	-10.1	0	3	89
283	LMST01040247	5beta-stigmastane	Sterols	-10.1	0	2	109
284	ZINC000003875383		World_NOT_FDA	-10.1	1	3	100
285	ZINC000000899884		Metab	-10.1	0	0	31
286	LMST01010208	4alpha-methyl-5alpha-cholest-7-en-3-one	Chol$Sterols	-10.1	0	2	100
287	LMST02030093	Cortisol 21-acetate	Steroids$Sterol_Lipids	-10.1	1	2	86
288	ZINC000000000416		FDA	-10.1	3	0	59
289	ZINC000251993360		Metab	-10.1	0	0	64
290	LMST03020650	1alpha-Hydroxy-2-methylene-19-nor-(20S)-bishomopregnacalciferol	Sterol_Lipids	-10.1	1	2	61
291	LMST04010243	-	Sterol_Lipids	-10.1	1	2	75
292	LMST04010374	-	Sterol_Lipids	-10.1	3	2	83
293	LMST02030149	(20R)-17,20-dihydroxypregn-4-en-3-one	Estrogens$Steroids$Sterol_Lipids	-10.1	0	0	54
294	LMST04010436	-	Sterol_Lipids	-10.1	1	2	83
295	LMST02020079	5alpha-androst-16-en-3-one	Androgens$Steroids$Sterol_Lipids	-10.1	0	1	48
296	LMST01031108	-	Erg$Sterols	-10.1	1	4	110
297	CID_163331		Agonists-Antagonists	-10.1	0	2	96
298	LMST04010237	-	Sterol_Lipids	-10.1	0	2	68
299	ZINC000004098720		Metab	-10.1	1	3	86
300	LMST04010359	-	Sterol_Lipids	-10.1	0	0	63
301	ZINC000001620282		Metab	-10.1	0	0	30
302	ZINC000000403010		FDA	-10.1	1	0	54
303	LMST02020019	4-Chlorotestosterone	Androgens$Steroids$Sterol_Lipids	-10.1	0	1	60
304	ZINC000003807917		FDA	-10.1	1	1	43
305	LMST01030001	Campestane skeleton	Erg$Sterols	-10.1	0	2	97
306	ZINC000007997897		FDA	-10.1	0	0	54
307	LMST04010198	-	Sterol_Lipids	-10.1	0	0	73
308	ZINC000001620280		Metab	-10.1	0	0	31
309	ZINC000001620281		Metab	-10.1	0	0	30
310	LMST02030087	11-deoxycorticosterone	Steroids$Sterol_Lipids	-10.1	2	0	55
311	LMST04010293	-	Sterol_Lipids	-10.1	0	0	68
312	ZINC000013537284		FDA	-10.1	2	0	40
313	LMST03020017	(5E)-(22R)-22-hydroxy-24,25,26,27-tetranorvitamin D3 / (5E)-(22R)-22-hydroxy-24,25,26,27-tetranorcholecalciferol	Sterol_Lipids	-10.1	1	1	70
314	ZINC000001597393		Metab	-10.1	1	0	49
315	ZINC000013542964		Metab	-10.1	1	1	52
316	ZINC000001575028		Metab	-10.1	0	1	51
317	LMST02010036	17alpha-Ethinyl estradiol	Steroids$Sterol_Lipids	-10.1	0	1	50
318	ZINC000001999441		FDA	-10.1	0	1	75
319	ZINC000253501115		Metab	-10.1	2	1	86
320	ZINC000008219992		World_NOT_FDA	-10.1	2	3	95
321	LMST04010369	-	Sterol_Lipids	-10.1	1	1	68
322	LMST02030097	Norethindrone	Estrogens$Steroids$Sterol_Lipids	-10.1	0	0	60
323	ZINC000002568036		FDA	-10.1	1	0	43
324	ZINC000013449462		World_NOT_FDA	-10.1	1	0	71
325	LMST04010135	-	Sterol_Lipids	-10.1	0	0	77
326	ZINC000011616882		FDA	-10.1	0	0	68
327	LMST01031018	pregna-4,9(11)-diene-3,20-dione	Erg$Sterols	-10.1	0	1	45
328	LMST04010343	-	Sterol_Lipids	-10.1	0	0	86
329	ZINC000004096422		Metab	-10.1	0	2	97
330	ZINC000001554274		FDA	-10.1	1	0	75
331	LMST02030243	Clathroid B	Steroids$Sterol_Lipids	-10.1	1	1	57
332	ZINC000014819484		Metab	-10.1	1	1	56
333	ZINC000012496105		Metab	-10.1	1	3	58
334	LMST02020082	6-dehydrotestosterone	Androgens$Steroids$Sterol_Lipids	-10	0	3	56
335	ZINC000248290294		Metab	-10	1	4	109
336	ZINC000001627643		Metab	-10	0	1	47
337	LMST04010275	-	Sterol_Lipids	-10	0	1	65
338	ZINC000100033029		Metab	-10	1	0	77
339	LMST02020085	-	Androgens$Steroids$Sterol_Lipids	-10	0	1	49
340	LMST01030000	Ergostane skeleton	Erg$Sterols	-10	0	2	103
341	ZINC000004823107		Metab	-10	2	0	62
342	ChEBI_5852		Agonists-Antagonists	-10	0	0	46
343	LMST04030224	3alpha-OH-Delta7-dafachronic acid	DeltaL$Sterol_Lipids	-10	0	0	112
344	LMST01010167	3-dehydro-4-methylzymosterol	Chol$Sterols	-10	1	2	96
345	LMST01010149	4,4-dimethylcholesta-8,11,24-trienol	Chol$Sterols	-10	1	3	89
346	ZINC000005273905		Metab	-10	1	0	62
347	LMST01010339	-	Chol$Sterols	-10	0	2	108
348	LMST02020102	4-Hydroxytestosterone	Androgens$Steroids$Sterol_Lipids	-10	0	1	52
349	LMST01010015	Cholestenone	Chol$DeltaL$Sterols	-10	0	1	89
350	ZINC000013449412		World_NOT_FDA	-10	2	0	62
351	ZINC000003831405		FDA	-10	0	0	61
352	LMST02020008	alpha-androstenol	Androgens$Steroids$Sterol_Lipids	-10	0	1	53
353	ZINC000003875357		FDA	-10	2	1	59
354	ZINC000253598163		Metab	-10	4	1	67
355	ZINC000013533343		Metab	-10	2	1	45
356	LMST04010318	-	Sterol_Lipids	-10	1	0	74
357	LMST01031158	Craterol A	Erg$Sterols	-10	1	4	120
358	LMST01010248	3-ketocholesterol	Chol$DeltaL$Sterols	-10	0	2	95
359	ZINC000095636507		Metab	-10	1	4	105
360	LMST04010238	-	Sterol_Lipids	-10	2	0	67
361	LMST02020069	5beta-Dihydrotestosterone	Androgens$Steroids$Sterol_Lipids	-10	0	1	48
362	LMST05020022	3b,16a-Dihydroxyandrostenone sulfate	Sterol_Lipids	-10	1	1	62
363	LMST04010387	-	Sterol_Lipids	-10	0	2	68
364	ZINC000000898220		Metab	-10	1	0	36
365	LMST04010168	-	Sterol_Lipids	-10	1	2	76
366	ZINC000253388218		Metab	-10	0	0	78
367	ZINC000003875259		FDA	-10	1	2	101
368	ZINC000002032367		Metab	-10	3	0	45
369	LMST04010128	-	Sterol_Lipids	-10	0	0	75
370	ZINC000000004319		FDA	-10	3	0	57
371	ZINC000000403011		FDA	-10	3	0	57
372	ZINC000000121541		FDA	-10	1	0	42
373	ZINC000252679615		FDA	-10	1	0	47
374	ZINC000013677763		Metab	-10	0	0	70
375	ZINC000001650575		Metab	-10	0	0	42
376	ZINC000006467621		FDA	-10	1	0	31
377	LMST04010220	-	Sterol_Lipids	-10	2	2	83
378	LMST03020605	calicoferol A	Sterol_Lipids	-10	0	2	97
379	ZINC000000602632		FDA	-10	0	3	84
380	ZINC000006458014		Metab	-10	2	0	35
381	ZINC000002109876		Metab	-10	0	0	42
382	LMST02030150	pregn-4-en-3-one	Steroids$Sterol_Lipids	-10	0	0	52
383	ZINC000030729365		Metab	-10	0	1	62
384	LMST04010366	-	Sterol_Lipids	-10	1	1	61
385	ZINC000002032615		FDA	-10	2	0	73
386	ZINC000005273906		Metab	-10	1	0	60
387	LMST04010158	-	Sterol_Lipids	-10	1	1	80
388	ZINC000001552174		FDA	-10	1	2	78
389	LMST01010121	7-dehydro-desmosterol	Chol$Sterols	-10	2	2	101
390	LMST02020065	-	Androgens$Steroids$Sterol_Lipids	-10	1	0	57
391	LMST04010008	-	Sterol_Lipids	-10	0	0	98
392	LMST02020075	Testosterone enanthate	Androgens$Steroids$Sterol_Lipids	-10	0	2	90
393	LMST04010206	-	Sterol_Lipids	-10	0	1	86
394	LMST03020665	24-Dehydroprevitamin D3	Sterol_Lipids	-10	1	1	89
395	LMST04010235	-	Sterol_Lipids	-10	1	0	80
396	ZINC000002572698		Metab	-9.9	0	0	41
397	LMST04010458	Bendigole C	Sterol_Lipids	-9.9	0	2	74
398	LMST01010402	Pentalinonsterol	Chol$Sterols	-9.9	0	1	89
399	ZINC000014762755		Metab	-9.9	1	0	73
400	LMST02010043	estrone 3-sulfate	Steroids$Sterol_Lipids	-9.9	1	2	48
401	LMST04010334	-	Sterol_Lipids	-9.9	0	0	72
402	LMST02030181	20-hydroxy-3-oxopregn-4-en-21-al	Steroids$Sterol_Lipids	-9.9	1	0	52
403	ZINC000014811056		Metab	-9.9	0	0	58
404	LMST01031050	-	Erg$Sterols	-9.9	2	2	91
405	LMST02010047	16-Ketoestradiol	Steroids$Sterol_Lipids	-9.9	1	0	45
406	LMST04010142	-	Sterol_Lipids	-9.9	0	1	69
407	LMST01010225	4,4-Dimethylcholest-8-enol	Chol$Sterols	-9.9	1	4	110
408	LMST02030179	prednisolone	DeltaL$Estrogens$Steroids	-9.9	2	1	63
409	ZINC000003136353		Metab	-9.9	2	0	49
410	LMST04010213	-	Sterol_Lipids	-9.9	1	2	81
411	LMST04010377	-	Sterol_Lipids	-9.9	1	0	78
412	LMST01040262	poriferastane	Sterols	-9.9	0	1	111
413	ZINC000006050191		Metab	-9.9	1	0	44
414	ZINC000004213946		FDA	-9.9	0	0	84
415	ZINC000003473539		Metab	-9.9	1	0	42
416	61W		PDB	-9.9	0	0	49
417	LMST01030122	-	Erg$Sterols	-9.9	0	2	105
418	LMST02020091	3a,16b-Dihydroxyandrostenone	Androgens$Steroids$Sterol_Lipids	-9.9	1	1	42
419	ZINC000001557162		Metab	-9.9	1	0	78
420	LMST04010392	-	Sterol_Lipids	-9.9	0	2	84
421	ZINC000014819291		Metab	-9.9	3	0	47
422	ZINC000001557163		Metab	-9.9	1	0	83
423	ZINC000004098363		Metab	-9.9	1	1	60
424	ZINC000014984540		Metab	-9.9	0	2	54
425	LMST02010020	-	Steroids$Sterol_Lipids	-9.9	0	0	36
426	LMST02020004	11beta-Hydroxyisoandrosterone	Androgens$Steroids$Sterol_Lipids	-9.9	1	1	53
427	ZINC000002033819		Metab	-9.9	3	0	66
428	ZINC000100065283		Metab	-9.9	3	0	55
429	LMST04010002	5alpha-Cholanoic acid	Sterol_Lipids	-9.9	0	2	71
430	ZINC000002575127		Metab	-9.9	3	0	55
431	LMST04030221	(25S)-Delta(4)-dafachronic acid	DeltaL$Sterol_Lipids	-9.9	0	2	100
432	ZINC000000599734		FDA	-9.9	1	0	48
433	LMST01031124	6-deoxo-3-dehydroteasterone	Erg$Sterols	-9.9	1	2	100
434	LMST01040246	5beta-poriferastane	Sterols	-9.9	0	2	113
435	ZINC000018847051		Metab	-9.9	1	0	31
436	LMST01031048	-	Erg$Sterols	-9.9	1	2	97
437	ZINC000003833821		FDA	-9.9	2	1	65
438	ZINC000014819293		Metab	-9.9	3	0	48
439	ZINC000003815424		FDA	-9.9	0	1	57
440	LMST02030124	Ethynodiol diacetate	Steroids$Sterol_Lipids	-9.9	1	1	76
441	LMST02030127	Lynestrenol	Steroids$Sterol_Lipids	-9.9	0	0	59
442	LMST04010041	Lagodeoxycholic acid	Sterol_Lipids	-9.9	0	0	74
443	LMST04010009	-	Sterol_Lipids	-9.9	0	0	77
444	LMST05020023	5alpha-Dihydrotestosterone sulfate	Sterol_Lipids	-9.9	1	0	58
445	ZINC000014651456		Metab	-9.9	2	0	55
446	GMJ		PDB	-9.9	0	1	69
447	ZINC000051133897		FDA	-9.9	3	2	46
448	ZINC000034290145		Metab	-9.9	2	0	43
449	LMST04010447	Avideoxycholic acid	Sterol_Lipids	-9.9	1	1	76
450	ZINC000002381600		Metab	-9.9	0	0	63
451	LMST02010040	Estradiol dipropionate	Steroids$Sterol_Lipids	-9.9	1	1	83
452	ZINC000005844792		FDA	-9.9	1	1	83
453	ZINC000253597111		Metab	-9.9	0	1	63
454	LMST01031019	4alpha-Methylfecosterol	Erg$Sterols	-9.9	1	3	104
455	ZINC000035457583		Metab	-9.9	0	0	80
456	ZINC000229763735		Metab	-9.9	0	0	75
457	LMST02020006	-	Androgens$Steroids$Sterol_Lipids	-9.9	1	1	41
458	LMST04010200	-	Sterol_Lipids	-9.9	0	1	84
459	ZINC000002033818		Metab	-9.9	3	0	65
460	ZINC000000607986		FDA	-9.9	1	1	88
461	ZINC000003876186		FDA	-9.9	1	2	44
462	LMST04010160	-	Sterol_Lipids	-9.9	1	0	82
463	ZINC000006569100		Metab	-9.9	1	4	109
464	ZINC000002386791		Metab	-9.9	1	4	103
465	LMST01010059	4,6-cholestadienone	Chol$Sterols	-9.9	0	2	90
466	ZINC000001850374		FDA	-9.9	0	0	68
467	ZINC000004428527		World_NOT_FDA	-9.9	2	1	76
468	ZINC000014690464		Metab	-9.9	0	1	63
469	LMST01031058	Sarcosterol	Erg$Sterols	-9.9	0	5	116
470	LMST04010321	-	Sterol_Lipids	-9.9	2	1	84
471	LMST02020103	Dehydroandrosterone	Androgens$Steroids$Sterol_Lipids	-9.9	0	1	38
472	LMST02030152	20-hydroxypregn-4-en-3-one	Steroids$Sterol_Lipids	-9.9	0	0	51
473	LMST02030153	(20R)-20-hydroxypregn-4-en-3-one	Steroids$Sterol_Lipids	-9.9	0	0	52
474	LMST02030195	21-Deoxycortisol	Steroids$Sterol_Lipids	-9.8	0	2	55
475	ZINC000005167145		World_NOT_FDA	-9.8	0	2	85
476	LMST04010132	-	Sterol_Lipids	-9.8	0	2	78
477	ZINC000014819147		Metab	-9.8	0	0	66
478	LMST02020112	17-hydroxy-androstan-1,3-dione	Androgens$Steroids$Sterol_Lipids	-9.8	1	1	62
479	ZINC000013485697		Metab	-9.8	0	4	77
480	ZINC000077287124		World_NOT_FDA	-9.8	1	0	82
481	LMST02020018	Dehydrotestosterone	Androgens$Steroids$Sterol_Lipids	-9.8	0	1	48
482	ZINC000000538550		FDA	-9.8	1	1	89
483	ZINC000003136351		Metab	-9.8	2	0	50
484	ZINC000004098632		Metab	-9.8	0	1	37
485	ZINC000004090721		Metab	-9.8	6	0	52
486	ZINC000106402640		Metab	-9.8	3	2	69
487	LMST02020000	Androstrane skeleton	Androgens$Steroids$Sterol_Lipids	-9.8	0	1	53
488	ZINC000038147404		Metab	-9.8	2	2	53
489	ZINC000144006246		Metab	-9.8	0	3	79
490	ZINC000000057677		Metab	-9.8	0	0	33
491	ZINC000004080967		Metab	-9.8	0	3	78
492	ZINC000002516840		Metab	-9.8	2	2	91
493	ZINC000003831490		FDA	-9.8	2	0	91
494	LMST04010295	-	Sterol_Lipids	-9.8	0	0	60
495	LMST02020056	-	Androgens$Steroids$Sterol_Lipids	-9.8	0	1	57
496	LMST02020062	-	Androgens$Steroids$Sterol_Lipids	-9.8	1	1	61
497	ZINC000013544887		Metab	-9.8	3	1	71
498	LMST02020092	3a,16-Dihydroxyandrostenone	Androgens$Steroids$Sterol_Lipids	-9.8	1	1	38
499	ZINC000253477263		Metab	-9.8	3	2	75
500	LMST02030158	6-methylprednisolone	Steroids$Sterol_Lipids	-9.8	2	1	64
501	ZINC000043207851		FDA	-9.8	0	0	39
502	ZINC000014651453		Metab	-9.8	2	0	55
503	ZINC000000601254		FDA	-9.8	2	2	52
504	LMST01130011	Bufohydrolide B	Sterols	-9.8	3	2	74
505	ZINC000040164545		Metab	-9.8	0	1	80
506	LMST01030110	-	Erg$Sterols	-9.8	2	3	107
507	LMST01160004	Minabeolide-3	Sterols	-9.8	0	5	103
508	LMST02020090	3a,16a-Dihydroxyandrostenone	Androgens$Steroids$Sterol_Lipids	-9.8	1	1	39
509	LMST04010344	-	Sterol_Lipids	-9.8	0	1	70
510	ZINC000006095202		Metab	-9.8	3	0	55
511	ZINC000095618468		Metab	-9.8	2	1	55
512	ZINC000000968375		FDA	-9.8	0	1	52
513	LMST02020064	16alpha-Hydroxydehydroepiandrosterone	Androgens$Steroids$Sterol_Lipids	-9.8	1	1	45
514	LMST04010330	-	Sterol_Lipids	-9.8	0	1	71
515	ZINC000100036756		FDA	-9.8	1	0	42
516	LMST04010018	-	Sterol_Lipids	-9.8	0	2	76
517	LMST04010221	-	Sterol_Lipids	-9.8	0	3	74
518	LMST04010010	-	Sterol_Lipids	-9.8	0	0	84
519	ZINC000001557164		Metab	-9.8	2	0	85
520	ZINC000000121480		FDA	-9.8	0	0	44
521	LMST04010028	Allohyodeoxycholic acid	Sterol_Lipids	-9.8	0	0	83
522	ZINC000004099004		Metab	-9.8	3	2	98
523	ZINC000001557161		Metab	-9.8	1	0	79
524	ZINC000000338231		Metab	-9.8	2	2	56
525	LMST01010364	7-dehydrocholesterol-d7	Chol$Sterols	-9.8	1	2	107
526	ZINC000006094187		Metab	-9.8	0	1	64
527	LMST04010269	-	Sterol_Lipids	-9.8	0	0	78
528	ZINC000253477262		Metab	-9.8	3	2	72
529	ZINC000016026413		Metab	-9.8	4	0	48
530	ZINC000013130921		Metab	-9.8	1	2	71
531	ZINC000000839083		World_NOT_FDA	-9.8	1	0	58
532	LMST04030119	-	Sterol_Lipids	-9.8	0	0	92
533	ZINC000003812897		FDA	-9.8	0	1	53
534	ZINC000013559434		World_NOT_FDA	-9.8	1	0	68
535	ZINC000002383057		Metab	-9.8	2	0	53
536	ZINC000004899436		Metab	-9.8	0	0	47
537	ZINC000009133172		World_NOT_FDA	-9.8	1	0	61
538	LMST02020067	-	Androgens$Steroids$Sterol_Lipids	-9.8	1	1	62
539	ZINC000059230365		Metab	-9.8	1	4	112
540	ZINC000011681534		FDA	-9.8	1	0	87
541	LMST03020242	astrogorgiadiol B	Sterol_Lipids	-9.8	0	0	98
542	LMST01031071	Stoloniferone A	Erg$Sterols	-9.8	0	3	105
543	ZINC000014648318		Metab	-9.8	4	0	78
544	ZINC000000899429		Metab	-9.8	1	0	73
545	LMST04010424	-	Sterol_Lipids	-9.8	1	1	80
546	ZINC000002382739		Metab	-9.8	2	1	69
547	LMST02020120	11-ketoTestosterone	Androgens$Steroids$Sterol_Lipids	-9.8	0	1	54
548	ZINC000000001937		Metab	-9.8	0	1	39
549	ZINC000253597113		Metab	-9.8	0	1	62
550	ZINC000013509425		World_NOT_FDA	-9.8	0	0	35
551	LMST02020002	Testosterone	Androgens$Steroids$Sterol_Lipids	-9.8	0	1	48
552	ZINC000003861150		World_NOT_FDA	-9.8	1	2	62
553	LMST01040189	Norselic acid A	Sterols	-9.8	1	2	110
554	ZINC000000597013		FDA	-9.8	1	1	73
555	LMST02030178	6alpha-methylprednisolone	Steroids$Sterol_Lipids	-9.8	2	1	64
556	ZINC000008437774		Metab	-9.8	0	0	63
557	ZINC000095919483		Metab	-9.8	4	0	77
558	LMST02030164	16,17-didehydropregnenolone	DeltaL$Steroids$Sterol_Lipids	-9.8	1	1	60
559	ZINC000018258326		Metab	-9.8	2	2	52
560	LMST01010069	7-dehydrocholesterol	Chol$Sterols	-9.8	1	1	106
561	LMST01010316	Patinosterol	Chol$Sterols	-9.8	1	3	105
562	ZINC000238777009		Metab	-9.8	0	4	76
563	ZINC000000584092		FDA	-9.8	1	0	58
564	LMST04010209	-	Sterol_Lipids	-9.8	1	0	77
565	LMST04010148	-	Sterol_Lipids	-9.8	0	0	84
566	ZINC000005178748		Metab	-9.7	2	1	58
567	ZINC000005751264		Metab	-9.7	1	3	97
568	LMST04010335	-	Sterol_Lipids	-9.7	2	1	82
569	LMST01010086	22R-hydroxycholesterol	Chol$Sterols	-9.7	0	3	106
570	LMST02020096	-	Androgens$Steroids$Sterol_Lipids	-9.7	0	1	63
571	LMST01010057	27-hydroxy-cholesterol	Chol$Sterols	-9.7	0	2	113
572	ZINC000013449409		World_NOT_FDA	-9.7	3	1	75
573	ZINC000006484014		Metab	-9.7	2	0	41
574	LMST02020051	Epitestosterone	Androgens$Steroids$Sterol_Lipids	-9.7	0	1	58
575	ZINC000006070245		Metab	-9.7	0	2	42
576	LMST01031116	-	Erg$Sterols	-9.7	1	2	103
577	LMST04010364	-	Sterol_Lipids	-9.7	0	1	74
578	ZINC000034303701		Metab	-9.7	1	0	63
579	ZINC000004098746		Metab	-9.7	2	0	47
580	LMST04010401	-	Sterol_Lipids	-9.7	0	2	85
581	ZINC000015206004		Metab	-9.7	1	0	78
582	ZINC000253497340		Metab	-9.7	4	1	91
583	LMST04010138	-	Sterol_Lipids	-9.7	0	2	82
584	LMST02010044	nandrolone	Steroids$Sterol_Lipids	-9.7	0	1	44
585	ZINC000005784191		Metab	-9.7	0	3	62
586	ZINC000034303703		Metab	-9.7	2	0	60
587	ZINC000000006300		FDA	-9.7	1	0	42
588	ZINC000015251791		Metab	-9.7	1	1	65
589	ZINC000006536390		Metab	-9.7	1	0	45
590	ZINC000034303702		Metab	-9.7	2	0	62
591	LMST02030172	16alpha-hydroxypregnenolone	Steroids$Sterol_Lipids	-9.7	3	0	56
592	LMST01040264	stigmastane	Sterols	-9.7	0	4	105
593	LMST02030225	HDOPA	Steroids$Sterol_Lipids	-9.7	0	1	73
594	LMST02030160	9,11alpha-epoxypregn-4-ene-3,20-dione	Steroids$Sterol_Lipids	-9.7	0	0	54
595	ZINC000006472605		Metab	-9.7	0	0	40
596	LMST01010313	19-norcholestenone	Chol$Sterols	-9.7	0	2	88
597	LMST02030187	-	Estrogens$Steroids$Sterol_Lipids	-9.7	1	0	65
598	ZINC000014819519		Metab	-9.7	2	0	58
599	LMST01031081	-	Erg$Sterols	-9.7	1	2	99
600	LMST01031194	-	Erg$Sterols	-9.7	0	2	92
601	LMST04010287	-	Sterol_Lipids	-9.7	2	3	76
602	ZINC000000001984		FDA	-9.7	1	0	42
603	LMST04010199	-	Sterol_Lipids	-9.7	1	1	81
604	LMST02010048	16-Oxoestrone	Steroids$Sterol_Lipids	-9.7	0	0	44
605	LMST04010240	-	Sterol_Lipids	-9.7	2	1	78
606	ZINC000012503068		FDA	-9.7	0	1	88
607	ZINC000004081322		Metab	-9.7	1	4	72
608	ZINC000256433946		FDA	-9.7	0	3	62
609	ZINC000002561261		Metab	-9.7	0	0	55
610	ZINC000002575132		Metab	-9.7	1	0	67
611	ZINC000001849659		Metab	-9.7	1	2	62
612	LMST02010017	-	Steroids$Sterol_Lipids	-9.7	0	0	45
613	LMST01031119	22S-hydroxy-24-methylene-cholesterol	Erg$Sterols	-9.7	2	3	110
614	LMST02020118	-	Androgens$Steroids$Sterol_Lipids	-9.7	1	0	67
615	LMST04010338	-	Sterol_Lipids	-9.7	1	2	87
616	ZINC000002583586		Metab	-9.7	1	0	49
617	LMST02030148	12alpha-hydroxyprogesterone	Estrogens$Steroids$Sterol_Lipids	-9.7	0	0	63
618	ZINC000006067695		Metab	-9.7	1	0	55
619	ZINC000253501116		Metab	-9.7	3	0	75
620	ZINC000005854709		Metab	-9.7	0	0	104
621	ZINC000002558138		Metab	-9.7	1	0	40
622	ZINC000003947419		Metab	-9.7	1	4	69
623	ZINC000001634550		Metab	-9.7	1	4	72
624	LMST02020013	Methandrostenolone	Androgens$Steroids$Sterol_Lipids	-9.7	0	0	45
625	ZINC000100014475		FDA	-9.7	0	0	43
626	LMST02030090	Cortisone	Estrogens$Steroids$Sterol_Lipids	-9.7	2	1	61
627	ZINC000000236891		Metab	-9.7	0	0	41
628	ZINC000000391976		Metab	-9.7	1	0	33
629	LMST01010000	Cholestane skeleton	Chol$Sterols	-9.7	0	2	94
630	ZINC000014449640		Metab	-9.7	1	4	73
631	ZINC000000057512		FDA	-9.7	4	1	50
632	ZINC000001530571		FDA	-9.7	0	0	80
633	LMST01010282	22-methylenecholesterol	Chol$Sterols	-9.7	1	3	109
634	LMST01010353	1,4-cholestadienone	Chol$Sterols	-9.7	0	1	86
635	ZINC000100412689		Metab	-9.7	2	2	43
636	LMST01010229	-	Chol$Sterols	-9.7	1	3	103
637	LMST04030124	-	Sterol_Lipids	-9.7	1	2	99
638	LMST05020001	5alpha-androstane-3alpha-ol-17-one sulfate	Sterol_Lipids	-9.7	1	2	69
639	ZINC000004731263		Metab	-9.7	3	2	60
640	ZINC000000057674		Metab	-9.7	0	0	31
641	ZINC000256068537		Metab	-9.7	0	2	61
642	ZINC000001849660		Metab	-9.7	0	1	54
643	ZINC000034042772		Metab	-9.7	1	0	51
644	ZINC000100018598		FDA	-9.7	2	0	72
645	LMST04010204	-	Sterol_Lipids	-9.7	0	0	74
646	ZINC000031417974		World_NOT_FDA	-9.7	3	1	78
647	ZINC000001850377		FDA	-9.7	0	0	60
648	LMST05020040	2-hydroxyestrone	Steroids$Sterol_Lipids	-9.7	2	1	61
649	ZINC000100016084		FDA	-9.7	0	1	89
650	ZINC000003022621		Metab	-9.7	1	4	71
651	ZINC000000402670		Metab	-9.7	1	0	49
652	LMST04010043	-	Sterol_Lipids	-9.7	1	0	76
653	ZINC000003830986		FDA	-9.7	1	0	56
654	LMST04010207	-	Sterol_Lipids	-9.7	0	0	73
655	LMST01010202	4alpha-methylzymosterol	Chol$Sterols	-9.7	1	2	99
656	LMST02020001	Androsterone	Androgens$Steroids$Sterol_Lipids	-9.7	0	2	55
657	ZINC000014811058		Metab	-9.7	1	0	44
658	ZINC000001849658		Metab	-9.7	1	2	62
659	ZINC000000537822		FDA	-9.7	0	1	71
660	LMST04010015	-	Sterol_Lipids	-9.7	2	1	72
661	LMST01110005	(24S)-isocalysterol	Sterols	-9.7	1	5	107
662	LMST04010111	-	Sterol_Lipids	-9.7	1	0	80
663	ZINC000003872070		Metab	-9.7	0	0	39
664	ZINC000014824027		Metab	-9.7	1	0	57
665	LMST01010078	Coprostanol	Chol$Sterols	-9.7	1	2	96
666	ZINC000014947781		Metab	-9.7	0	0	65
667	ZINC000012363891		Metab	-9.6	0	0	69
668	ZINC000256518227		Metab	-9.6	1	4	106
669	LMST02010024	-	Steroids$Sterol_Lipids	-9.6	1	0	39
670	LMST02010018	-	Steroids$Sterol_Lipids	-9.6	3	1	50
671	ZINC000257536028		Metab	-9.6	1	1	88
672	LMST02020086	11-Hydroxyandrosterone	Androgens$Steroids$Sterol_Lipids	-9.6	1	1	49
673	LMST04010004	Isolithocholic acid	Sterol_Lipids	-9.6	0	1	82
674	LMST01010277	-	Chol$Sterols	-9.6	1	3	98
675	ZINC000015258073		Metab	-9.6	1	0	57
676	LMST03020333	6-methylprevitamin D3 / 6-methylprecholecalciferol	Sterol_Lipids	-9.6	0	2	111
677	LMST02020029	17-Methyltestosterone	Androgens$Steroids$Sterol_Lipids	-9.6	0	0	53
678	ZINC000004073895		Metab	-9.6	1	1	92
679	LMST04010260	-	Sterol_Lipids	-9.6	0	2	82
680	LMST02030130	Allopregnanolone	Estrogens$Steroids$Sterol_Lipids	-9.6	0	0	58
681	ZINC000004090458		Metab	-9.6	5	0	48
682	LMST04010131	-	Sterol_Lipids	-9.6	0	0	80
683	ZINC000014687880		Metab	-9.6	0	3	82
684	LMST01010226	-	Chol$Sterols	-9.6	2	5	102
685	ZINC000001530975		FDA	-9.6	0	1	58
686	ZINC000000058171		Metab	-9.6	0	0	41
687	ZINC000085879702		Metab	-9.6	2	1	51
688	LMST04010400	-	Sterol_Lipids	-9.6	0	3	71
689	ZINC000100051402		Metab	-9.6	0	0	42
690	ZINC000001531881		Metab	-9.6	0	0	65
691	ZINC000005764434		Metab	-9.6	2	0	50
692	LMST04010361	-	Sterol_Lipids	-9.6	0	2	75
693	LMST04010027	Isomurideoxycholic acid	Sterol_Lipids	-9.6	1	0	80
694	ZINC000000075126		FDA	-9.6	0	1	43
695	LMST01030096	22,23-dihydrobrassicasterol	Erg$Sterols	-9.6	1	3	109
696	ZINC000033995932		Metab	-9.6	1	0	43
697	ZINC000038883997		Metab	-9.6	1	1	59
698	ZINC000008219876		Metab	-9.6	0	1	72
699	ZINC000014757021		Metab	-9.6	0	1	43
700	ZINC000002561117		Metab	-9.6	4	0	70
701	LMST01030099	Chalinasterol	Erg$Sterols	-9.6	0	2	108
702	ZINC000004787206		Metab	-9.6	0	0	69
703	LMST04010155	-	Sterol_Lipids	-9.6	2	2	74
704	LMST05010045	Dehydroepiandrosterone 3-glucuronide	Androgens$Steroids$Sterol_Lipids	-9.6	1	3	89
705	ZINC000005167248		World_NOT_FDA	-9.6	0	2	81
706	ZINC000000265476		Metab	-9.6	2	2	58
707	LMST04010005	Allolithocholic acid	Sterol_Lipids	-9.6	0	0	75
708	LMST01110001	Calysterol	Sterols	-9.6	0	5	110
709	ZINC000001691515		Metab	-9.6	1	2	53
710	LMST04010271	-	Sterol_Lipids	-9.6	1	0	87
711	ZINC000027994016		Metab	-9.6	1	0	70
712	ZINC000118912393		FDA	-9.6	0	1	51
713	LMST02030000	Pregnane skeleton	Steroids$Sterol_Lipids	-9.6	0	1	55
714	ZINC000027994020		Metab	-9.6	3	0	73
715	LMST01010446	3beta,4beta-dihydroxycholest-8(9)-en-23-one	Chol$Sterols	-9.6	3	3	104
716	ZINC000022010649		FDA	-9.6	0	0	70
717	LMST02020107	Mesterolone	Androgens$Steroids$Sterol_Lipids	-9.6	0	2	62
718	ZINC000013508093		Metab	-9.6	3	0	66
719	ZINC000020470285		Metab	-9.6	1	4	70
720	ZINC000006018661		Metab	-9.6	1	2	66
721	LMST01031191	-	Erg$Sterols	-9.6	1	3	103
722	LMST02030201	Ethyltestosterone	Estrogens$Steroids$Sterol_Lipids	-9.6	0	0	52
723	LMST01010351	4,6-cholestadienol	Chol$Sterols	-9.6	1	2	96
724	LMST01010482	Saxosterol	Chol$Sterol_Lipids	-9.6	2	5	111
725	ZINC000014825436		Metab	-9.6	1	2	73
726	ZINC000014442544		Metab	-9.6	2	0	56
727	LMST01130066	Bufogargarizin C	Sterols	-9.6	1	3	58
728	ZINC000004027519		Metab	-9.6	1	3	83
729	LMST02020023	Epiandrosterone	Androgens$Steroids$Sterol_Lipids	-9.6	1	1	54
730	ZINC000257476015		Metab	-9.6	0	3	113
731	LMST03020180	calicoferol B	Sterol_Lipids	-9.6	1	3	115
732	LMST01010232	-	Chol$Sterols	-9.6	2	2	107
733	LMST02020094	-	Androgens$Steroids$Sterol_Lipids	-9.6	0	2	58
734	ZINC000002138728		Metab	-9.6	1	0	69
735	ZINC000000985403		Metab	-9.6	0	0	38
736	LMST04010208	-	Sterol_Lipids	-9.6	0	2	74
737	ZINC000018847037		Metab	-9.6	0	0	42
738	ZINC000013382393		Metab	-9.6	2	0	54
739	ZINC000014760151		Metab	-9.6	1	0	65
740	LMST01010288	-	Chol$Sterols	-9.6	1	2	79
741	ZINC000004228312		Metab	-9.6	2	0	41
742	LMST02030168	11beta-hydroxyprogesterone	Steroids$Sterol_Lipids	-9.6	0	1	56
743	LMST01040192	Norselic acid D	Sterols	-9.6	2	1	116
744	LMST01130010	Bufohydrolide A	Sterols	-9.6	2	3	78
745	LMST03020157	calicoferol E	Sterol_Lipids	-9.6	1	2	106
746	LMST04010205	-	Sterol_Lipids	-9.6	1	0	87
747	ZINC000000189892		Metab	-9.6	1	0	37
748	ZINC000001850376		FDA	-9.6	1	0	79
749	LMST01031015	Ergosta-5,7,22,24(28)-tetraen-3beta-ol	Erg$Sterols	-9.6	1	2	104
750	ZINC000001605267		Metab	-9.6	1	0	42
751	ZINC000013545798		Metab	-9.6	0	0	50
752	LMST04010140	-	Sterol_Lipids	-9.6	1	2	71
753	LMST02020115	3,17-dihydroxy-9,10-seco-androsta-1,3,5(10)-triene-9-one	Androgens$Steroids$Sterol_Lipids	-9.6	2	0	57
754	ZINC000013327493		Metab	-9.6	0	0	39
755	ZINC000001530977		FDA	-9.6	0	1	52
756	LMST04010272	-	Sterol_Lipids	-9.6	1	1	90
757	ZINC000006525252		Metab	-9.6	3	0	34
758	ZINC000002384987		Metab	-9.6	3	0	76
759	ZINC000002149675		Metab	-9.6	0	0	38
760	ZINC000000538312		FDA	-9.6	1	1	92
761	LMST04010024	Hyodeoxycholic acid	Sterol_Lipids	-9.6	0	2	80
762	ZINC000000519174		Metab	-9.6	0	0	38
763	ZINC000100051419		World_NOT_FDA	-9.6	0	1	60
764	ZINC000001663391		Metab	-9.6	0	1	51
765	ZINC000005669265		Metab	-9.6	3	0	43
766	ZINC000006411540		Metab	-9.6	1	0	48
767	LMST02010007	-	Steroids$Sterol_Lipids	-9.6	1	1	37
768	ZINC000004787209		Metab	-9.6	0	0	69
769	ZINC000013549141		Metab	-9.6	1	0	50
770	LMST02030185	3beta-hydroxy-5beta-pregnan-20-one	Estrogens$Steroids$Sterol_Lipids	-9.6	0	2	56
771	LMST01130063	Bufogargarizin D	Sterols	-9.6	1	1	71
772	LMST01110008	24,26-cyclocholesterol	Sterols	-9.6	0	3	101
773	ZINC000006050190		Metab	-9.6	0	1	41
774	ZINC000008584338		Metab	-9.6	0	0	37
775	LMST01031028	Codisterol	Erg$Sterols	-9.6	1	3	106
776	LMST02020088	16-Oxoandrostenediol	Androgens$Steroids$Sterol_Lipids	-9.6	2	1	46
777	LMST01010349	1-(5alpha)-cholestenone	Chol$Sterols	-9.6	1	2	101
778	ZINC000001605264		Metab	-9.6	0	0	42
779	ZINC000257536029		Metab	-9.6	1	1	89
780	ZINC000000899920		Metab	-9.6	2	0	35
781	ZINC000013545799		Metab	-9.6	0	0	48
782	ZINC000005854698		Metab	-9.6	1	0	104
783	LMST02020095	-	Androgens$Steroids$Sterol_Lipids	-9.6	0	1	44
784	ZINC000000538483		FDA	-9.6	0	1	70
785	LMST02030096	4,5alpha-Dihydrocortisone	Estrogens$Steroids$Sterol_Lipids	-9.6	1	1	61
786	ZINC000001531872		Metab	-9.6	1	1	44
787	LMST02010003	-	Steroids$Sterol_Lipids	-9.6	1	0	46
788	ZINC000118912517		FDA	-9.6	0	1	59
789	ZINC000006067693		Metab	-9.6	1	0	53
790	ZINC000013327491		Metab	-9.6	1	0	41
791	ZINC000003648307		Metab	-9.5	1	1	50
792	LMST02020005	Androstenediol	Androgens$Steroids$Sterol_Lipids	-9.5	1	1	41
793	LMST01030119	-	Erg$Sterols	-9.5	1	4	106
794	LMST01010345	22S-hydroxycholesterol	Chol$Sterols	-9.5	3	4	110
795	ZINC000015263540		Metab	-9.5	1	0	47
796	ZINC000003651514		Metab	-9.5	1	0	61
797	ZINC000239432806		Metab	-9.5	0	4	76
798	ZINC000014762971		Metab	-9.5	2	1	57
799	LMST04070035	Homolithocholic acid	Sterol_Lipids	-9.5	0	0	79
800	ZINC000000402911		Metab	-9.5	1	0	38
801	ZINC000004098928		Metab	-9.5	1	2	62
802	LMST01040191	Norselic acid B	Sterols	-9.5	3	1	117
803	ZINC000002560983		Metab	-9.5	3	0	68
804	ZINC000000899905		Metab	-9.5	1	0	44
805	ZINC000000899909		Metab	-9.5	1	2	56
806	ZINC000409421828		Metab	-9.5	3	0	52
807	LMST01010289	-	Chol$Sterols	-9.5	1	4	103
808	LMST02030224	20alpha-DHOPA	Estrogens$Steroids$Sterol_Lipids	-9.5	0	1	68
809	LMST02030194	18-Oxocortisol	Steroids$Sterol_Lipids	-9.5	2	0	70
810	ZINC000253598162		Metab	-9.5	2	1	75
811	ZINC000003651516		World_NOT_FDA	-9.5	2	0	57
812	ZINC000022061255		Metab	-9.5	1	0	32
813	LMST04030220	(25S)-dafachronic acid	Sterol_Lipids	-9.5	0	2	106
814	ZINC000003831282		FDA	-9.5	2	0	56
815	ZINC000000001360		Metab	-9.5	2	0	43
816	ZINC000014807483		Metab	-9.5	2	0	47
817	ZINC000006067691		Metab	-9.5	1	0	55
818	ZINC000003818726		FDA	-9.5	2	1	48
819	ZINC000100051405		Metab	-9.5	0	1	60
820	LMST05020020	cortisol 21-sulfate	Sterol_Lipids	-9.5	1	3	78
821	LMST02030121	Hydrocortisone cypionate	Steroids$Sterol_Lipids	-9.5	1	3	136
822	ZINC000018825330		Metab	-9.5	0	0	40
823	ZINC000014517334		Metab	-9.5	5	0	48
824	ZINC000008681596		Metab	-9.5	2	0	40
825	ZINC000004098319		Metab	-9.5	1	0	32
826	ZINC000014762498		Metab	-9.5	1	0	70
827	ZINC000253609460		Metab	-9.5	2	4	109
828	ZINC000013352617		Metab	-9.5	5	0	49
829	ZINC000014760153		Metab	-9.5	1	0	65
830	LMST02030223	11beta,20-Dihydroxy-3-oxopregn-4-en-21-oic acid	Estrogens$Steroids$Sterol_Lipids	-9.5	0	1	69
831	LMST01010174	5alpha-cholestanone	Chol$Sterols	-9.5	0	2	94
832	ZINC000000057588		Metab	-9.5	1	0	37
833	LMST02020063	-	Androgens$Steroids$Sterol_Lipids	-9.5	1	0	54
834	ZINC000022062288		Metab	-9.5	1	0	45
835	ZINC000005998758		Metab	-9.5	1	0	44
836	LMST01010283	Pinnasterol	Chol$Sterols	-9.5	0	3	117
837	LMST04010143	-	Sterol_Lipids	-9.5	0	2	76
838	LMST04030110	Epi-coprostanol	Sterol_Lipids	-9.5	0	2	95
839	LMST01010234	-	Chol$Sterols	-9.5	3	4	108
840	LMST04010398	-	Sterol_Lipids	-9.5	1	3	76
841	LMST04010026	Isohydroxycholic acid	Sterol_Lipids	-9.5	1	0	72
842	ZINC000043746983		Metab	-9.5	0	4	78
843	LMST04010045	-	Sterol_Lipids	-9.5	0	0	82
844	ZINC000014918972		Metab	-9.5	3	0	53
845	ZINC000253501114		Metab	-9.5	1	1	80
846	ZINC000000009689		FDA	-9.5	1	0	55
847	ZINC000003873160		FDA	-9.5	2	2	105
848	LMST01010310	20S-Hydroxycholest-4-en-3,16-dione	Chol$Sterols	-9.5	0	1	111
849	ZINC000001570586		Metab	-9.5	1	0	67
850	ZINC000013108863		Metab	-9.5	1	0	65
851	ZINC000000601305		FDA	-9.5	2	1	68
852	LMST01010095	22-dehydrocholesterol	Chol$Sterols	-9.5	1	4	99
853	LMST04010282	-	Sterol_Lipids	-9.5	0	1	82
854	LMST01010287	26,27-bisnor-22-dehydro-cholesterol	Chol$Sterols	-9.5	1	2	81
855	LMST02030125	Allylestrenol	Estrogens$Steroids$Sterol_Lipids	-9.5	0	2	57
856	ZINC000257513458		Metab	-9.5	0	0	52
857	LMST01060010	(22R,23R)-methylenecholesterol	Sterols	-9.5	1	5	105
858	ZINC000000898889		Metab	-9.5	1	0	37
859	LMST01010227	-	Chol$Sterols	-9.5	1	4	117
860	LMST04010201	-	Sterol_Lipids	-9.5	1	2	84
861	LMST01030135	5-dehydroepisterol	Erg$Sterols	-9.5	1	4	96
862	ZINC000000896560		FDA	-9.5	0	1	56
863	ZINC000000900119		Metab	-9.5	0	1	49
864	ZINC000013335591		Metab	-9.5	1	0	55
865	LMST04010286	-	Sterol_Lipids	-9.5	0	0	81
866	LMST01031072	Stoloniferone B	Erg$Sterols	-9.5	0	2	100
867	ZINC000022061252		Metab	-9.5	2	0	30
868	ZINC000101489663		FDA	-9.5	1	0	57
869	ZINC000238751323		Metab	-9.5	2	2	82
870	ZINC000257402286		Metab	-9.5	1	0	84
871	ZINC000006067696		Metab	-9.5	2	0	57
872	ZINC000004096710		Metab	-9.5	0	3	109
873	ZINC000014806341		Metab	-9.5	1	0	32
874	ZINC000003978494		Metab	-9.5	0	0	32
875	LMST01010247	Lumisterol 3	Chol$Sterols	-9.5	0	3	83
876	ZINC000003947475		Metab	-9.5	0	0	49
877	ZINC000000388659		Metab	-9.5	1	0	42
878	LMST01031125	22,23-dihydroxycampesterol	Erg$Sterols	-9.5	2	4	110
879	ZINC000000601317		FDA	-9.5	1	2	101
880	LMST03020248	(6R)-6,19-epidioxy-6,19-dihydrovitamin D3 / (6R)-6,19-epidioxy-6,19-dihydrocholecalciferol	Sterol_Lipids	-9.5	0	3	101
881	ZINC000002522669		FDA	-9.5	0	1	58
882	ZINC000004654655		Metab	-9.5	0	3	96
883	LMST01030093	Ergosterol	Erg$Sterols	-9.5	1	4	101
884	ZINC000022061261		Metab	-9.5	2	0	32
885	ZINC000013508092		Metab	-9.5	1	0	53
886	ZINC000001605265		Metab	-9.5	1	0	44
887	ZINC000013322244		Metab	-9.5	0	0	47
888	ZINC000014610079		Metab	-9.5	0	1	51
889	ZINC000001599733		Metab	-9.5	2	0	54
890	LMST02030098	Urocortisone	Steroids$Sterol_Lipids	-9.5	1	2	67
891	ZINC000000155697		World_NOT_FDA	-9.5	0	0	50
892	ZINC000057509131		Metab	-9.5	0	2	69
893	ZINC000100074252		FDA	-9.5	0	1	109
894	LMST02020110	1-testosterone	Androgens$Steroids$Sterol_Lipids	-9.5	0	1	52
895	ZINC000004693575		FDA	-9.5	1	1	61
896	LMST04010048	-	Sterol_Lipids	-9.5	0	2	73
897	LMST02010000	Estrane skeleton	Steroids$Sterol_Lipids	-9.5	0	2	53
898	LMST02020111	1,17-dihydroxy-androstan-3-one	Androgens$Steroids$Sterol_Lipids	-9.5	0	1	54
899	LMST02010051	2-Hydroxyestradiol-3-methyl ether	Steroids$Sterol_Lipids	-9.5	1	1	59
900	ZINC000001605266		Metab	-9.5	1	0	44
901	ZINC000011680067		FDA	-9.5	1	2	63
902	LMST01010350	5, 20(22)-cholestadienol	Chol$Sterols	-9.5	1	5	109
903	ZINC000001634551		Metab	-9.5	0	4	80
904	ZINC000085874227		Metab	-9.5	2	0	56
905	LMST04010404	-	Sterol_Lipids	-9.5	1	1	85
906	ZINC000004692530		Metab	-9.5	2	1	60
907	LMST01010054	22-hydroxycholesterol	Chol$Sterols	-9.5	3	4	108
908	ZINC000014504316		Metab	-9.5	2	1	51
909	ZINC000000388657		Metab	-9.5	2	1	44
910	ZINC000000899790		Metab	-9.5	1	0	49
911	ZINC000003782599		FDA	-9.5	1	3	72
912	ChEBI_53289		Agonists-Antagonists	-9.5	1	0	81
913	LMST04010020	-	Sterol_Lipids	-9.5	1	0	79
914	ZINC000014760155		Metab	-9.5	2	0	66
915	ZINC000005273979		Metab	-9.5	0	0	51
916	ZINC000014488306		Metab	-9.5	1	0	56
917	LMST02030222	Insignin A	Estrogens$Steroids$Sterol_Lipids	-9.5	1	1	67
918	ZINC000039314945		Metab	-9.5	1	4	80
919	ZINC000004705638		Metab	-9.4	1	0	42
920	ZINC000013512287		Metab	-9.4	0	2	98
921	ZINC000038420578		Metab	-9.4	2	0	49
922	ZINC000257447822		Metab	-9.4	3	1	87
923	ZINC000257555998		Metab	-9.4	1	1	48
924	ZINC000005758789		Metab	-9.4	1	2	83
925	ZINC000004217387		Metab	-9.4	2	0	93
926	ZINC000013481340		Metab	-9.4	0	0	54
927	LMST02030001	Cortisol	Estrogens$Steroids$Sterol_Lipids	-9.4	3	2	59
928	ZINC000257536027		Metab	-9.4	1	0	87
929	LMST01030100	-	Erg$Sterols	-9.4	2	1	109
930	ZINC000000896557		FDA	-9.4	0	0	56
931	ZINC000014945920		Metab	-9.4	2	1	57
932	ZINC000014781096		Metab	-9.4	0	3	76
933	ZINC000050027013		Metab	-9.4	3	0	49
934	ZINC000014945922		Metab	-9.4	2	0	59
935	LMST02010012	-	Steroids$Sterol_Lipids	-9.4	2	0	36
936	ZINC000002384820		Metab	-9.4	1	0	51
937	ZINC000004731261		Metab	-9.4	0	0	55
938	ZINC000003875560		FDA	-9.4	2	2	70
939	LMST02010042	19-norandrosterone	Steroids$Sterol_Lipids	-9.4	1	2	63
940	LMST01010272	7-oxo-cholestenone	Chol$Sterols	-9.4	0	2	103
941	LMST01010089	Lathosterol	Chol$Sterols	-9.4	1	2	110
942	LMST02030126	Hydrocortisone succinate	Estrogens$Steroids$Sterol_Lipids	-9.4	0	1	115
943	LMST04010025	Murideoxycholic acid	Sterol_Lipids	-9.4	0	0	77
944	ZINC000014658258		Metab	-9.4	0	0	68
945	ZINC000001529772		Metab	-9.4	1	0	42
946	LMST04030072	Cholestenoic acid	Sterol_Lipids	-9.4	0	3	112
947	LMST02030189	-	Steroids$Sterol_Lipids	-9.4	1	2	78
948	ZINC000085879707		Metab	-9.4	1	0	56
949	ZINC000004216543		Metab	-9.4	2	0	51
950	ZINC000014945921		Metab	-9.4	3	0	58
951	ZINC000247879076		Metab	-9.4	3	0	77
952	LMST04030111	-	Sterol_Lipids	-9.4	2	2	96
953	ZINC000014811582		Metab	-9.4	2	0	27
954	ZINC000028361975		World_NOT_FDA	-9.4	0	0	41
955	ZINC000004693574		FDA	-9.4	0	0	64
956	LMST01030111	epicodisterol	Erg$Sterols	-9.4	2	2	108
957	ZINC000000404802		Metab	-9.4	0	0	47
958	LMST04010300	-	Sterol_Lipids	-9.4	2	3	80
959	ZINC000014819208		Metab	-9.4	0	0	75
960	ZINC000000900143		Metab	-9.4	0	0	34
961	ZINC000013129998		FDA	-9.4	2	1	53
962	ZINC000013374371		Metab	-9.4	1	0	62
963	ZINC000253916284		Metab	-9.4	2	0	56
964	ZINC000022061258		World_NOT_FDA	-9.4	3	0	33
965	ZINC000015116029		Metab	-9.4	0	0	37
966	LMST01010333	-	Chol$Sterols	-9.4	0	4	97
967	LMST02020054	6beta-hydroxytestosterone	Androgens$Steroids$Sterol_Lipids	-9.4	0	0	50
968	ZINC000014811580		Metab	-9.4	2	0	24
969	ZINC000000388661		Metab	-9.4	2	0	30
970	ZINC000034114948		Metab	-9.4	0	0	45
971	ZINC000001850645		Metab	-9.4	2	0	47
972	LMST02030230	beta-Cortolone	Steroids$Sterol_Lipids	-9.4	2	1	66
973	ZINC000002384977		Metab	-9.4	4	2	82
974	LMST01010284	-	Chol$Sterols	-9.4	1	2	92
975	ZINC000257428891		Metab	-9.4	2	0	83
976	ZINC000050027349		Metab	-9.4	3	0	46
977	ZINC000005273977		Metab	-9.4	0	0	51
978	LMST02030170	5alpha-pregnane-3,20-dione	Steroids$Sterol_Lipids	-9.4	0	0	55
979	LMST04010425	-	Sterol_Lipids	-9.4	0	0	76
980	LMST01010140	-	Chol$Sterols	-9.4	1	2	100
981	ZINC000000899105		Metab	-9.4	2	1	53
982	ZINC000014504527		Metab	-9.4	1	0	58
983	LMST02020122	11-Ketodihydrotestosterone	Androgens$Steroids$Sterol_Lipids	-9.4	0	1	48
984	ZINC000001850644		Metab	-9.4	1	0	50
985	ZINC000000388660		Metab	-9.4	2	0	31
986	ZINC000040899447		FDA	-9.4	1	1	80
987	ZINC000000899907		Metab	-9.4	0	0	39
988	ZINC000253497339		Metab	-9.4	6	1	103
989	LMST04010225	-	Sterol_Lipids	-9.4	0	1	68
990	ZINC000004215814		Metab	-9.4	0	2	101
991	ZINC000015116033		Metab	-9.4	0	0	33
992	ChEBI_92585		Agonists-Antagonists	-9.4	1	0	34
993	ZINC000005998597		Metab	-9.4	0	0	47
994	ZINC000004096609		Metab	-9.4	0	1	92
995	ZINC000003818826		Metab	-9.4	0	1	49
996	ZINC000006041766		Metab	-9.4	1	0	35
997	ZINC000253616140		Metab	-9.4	5	0	97
998	LMST03060002	Provitamin D7	Sterol_Lipids	-9.4	1	3	113
999	ZINC000014658255		Metab	-9.4	0	0	65
1000	LMST04010105	-	Sterol_Lipids	-9.4	1	1	91
1001	ZINC000004097107		Metab	-9.4	1	2	60
1002	ZINC000008584337		Metab	-9.4	0	0	32
1003	LMST02030141	3beta,17alpha,21-Trihydroxy-pregnenone	Estrogens$Steroids$Sterol_Lipids	-9.4	2	0	58
1004	LMST01010205	5beta-cholestanone	Chol$Sterols	-9.4	1	3	89
1005	ZINC000038192693		Metab	-9.4	0	0	47
1006	LMST02030251	Bathoristerone	Steroids$Sterol_Lipids	-9.4	0	0	65
1007	LMST01010090	Desmosterol(d6)	Chol$Sterols	-9.4	1	2	102
1008	ZINC000004095573		Metab	-9.4	0	1	91
1009	LMST04010345	-	Sterol_Lipids	-9.4	1	1	69
1010	LMST03020002	20-oxo-22,23,24,25,26,27-hexanorvitamin D3 / 20-oxo-22,23,24,25,26,27-hexanorcholecalciferol	Sterol_Lipids	-9.4	1	2	50
1011	ZINC000001665640		Metab	-9.4	1	0	34
1012	ZINC000000388658		Metab	-9.4	2	0	42
1013	LMST04030053	-	Sterol_Lipids	-9.4	1	3	98
1014	ZINC000002384973		Metab	-9.4	1	0	56
1015	ZINC000002384778		Metab	-9.4	1	0	51
1016	LMST02020012	Methandriol	Androgens$Steroids$Sterol_Lipids	-9.4	1	3	41
1017	ZINC000053084692		FDA	-9.4	0	0	55
1018	LMST04010288	-	Sterol_Lipids	-9.4	0	2	87
1019	ZINC000005817037		Metab	-9.4	0	1	48
1020	ZINC000000391977		Metab	-9.4	1	0	39
1021	ZINC000014768312		Metab	-9.4	0	0	38
1022	ZINC000000895958		Metab	-9.4	1	0	42
1023	ZINC000000897251		FDA	-9.4	1	0	78
1024	ZINC000003869369		Metab	-9.4	4	0	47
1025	LMST04010326	-	Sterol_Lipids	-9.4	0	2	65
1026	ZINC000004097967		Metab	-9.4	1	1	49
1027	LMST04030225	3beta-OH-Delta7-dafachronic acid	DeltaL$Sterol_Lipids	-9.4	1	2	115
1028	ZINC000022061296		Metab	-9.4	0	2	99
1029	LMST01130060	Bovogenin A	Sterols	-9.4	2	2	90
1030	LMST04010029	Allomurideoxycholic acid	Sterol_Lipids	-9.4	0	0	85
1031	LMST01040156	Baikalosterol	Sterols	-9.4	1	2	109
1032	ZINC000034220093		FDA	-9.4	2	0	32
1033	ZINC000003861782		Metab	-9.4	3	2	68
1034	ChEBI_104237		Agonists-Antagonists	-9.4	0	0	58
1035	ZINC000004096682		Metab	-9.4	0	2	46
1036	ZINC000003014484		Metab	-9.4	3	0	63
1037	ZINC000050027368		Metab	-9.4	3	0	46
1038	ZINC000004096611		Metab	-9.4	1	1	89
1039	ZINC000257402285		Metab	-9.4	1	2	86
1040	ZINC000003806413		FDA	-9.4	1	0	51
1041	LMST04070036	Homohyodeoxycholic acid	Sterol_Lipids	-9.4	0	0	89
1042	ZINC000050027425		Metab	-9.4	3	0	47
1043	ZINC000031417978		World_NOT_FDA	-9.4	4	2	75
1044	LMST04010011	-	Sterol_Lipids	-9.4	0	0	83
1045	LMST04030121	-	Sterol_Lipids	-9.4	1	1	96
1046	LMST02010054	11beta-hydroxyestrone	Steroids$Sterol_Lipids	-9.4	1	1	45
1047	LMST04010003	Lithocholic acid	Sterol_Lipids	-9.4	0	2	72
1048	LMST02010041	16alpha-hydroxyestrone	Steroids$Sterol_Lipids	-9.4	0	0	45
1049	ZINC000002097389		Metab	-9.4	2	2	97
1050	ZINC000238782347		Metab	-9.4	3	0	46
1051	ZINC000006093351		Metab	-9.4	1	0	39
1052	ZINC000014819517		Metab	-9.4	2	1	56
1053	LMST01010280	Cholesterol-6beta-hydroperoxide	Chol$Sterols	-9.4	1	2	104
1054	ZINC000004098734		Metab	-9.4	2	1	69
1055	LMST02030162	pregnan-21-al	Estrogens$Steroids$Sterol_Lipids	-9.4	1	2	58
1056	ZINC000028631632		Metab	-9.4	0	0	54
1057	ZINC000000899792		Metab	-9.4	0	0	54
1058	ZINC000027993997		Metab	-9.4	1	0	79
1059	ZINC000097973720		Metab	-9.4	2	0	56
1060	LMST04030054	-	Sterol_Lipids	-9.4	0	2	96
1061	ZINC000002556665		Metab	-9.4	0	0	39
1062	ZINC000253916280		Metab	-9.4	2	0	63
1063	ZINC000253916277		Metab	-9.4	3	0	69
1064	LMST02020099	5-Androstenetriol	Androgens$Steroids$Sterol_Lipids	-9.4	1	1	47
1065	LMST01030115	Episterol	Erg$Sterols	-9.4	1	1	98
1066	LMST04010434	-	Sterol_Lipids	-9.4	1	0	77
1067	ZINC000013374805		Metab	-9.4	1	1	44
1068	ZINC000022065398		FDA	-9.4	0	3	58
1069	ZINC000031159899		Metab	-9.4	1	0	44
1070	ZINC000031291853		World_NOT_FDA	-9.4	2	0	64
1071	ZINC000014504307		Metab	-9.4	0	1	46
1072	ZINC000000895953		Metab	-9.4	0	1	38
1073	ZINC000031159895		Metab	-9.4	1	0	56
1074	ZINC000009212667		Metab	-9.4	0	0	53
1075	ZINC000002384822		Metab	-9.4	3	0	69
1076	ZINC000005158948		Metab	-9.4	0	0	57
1077	ZINC000004097376		World_NOT_FDA	-9.4	2	1	71
1078	ZINC000005140767		World_NOT_FDA	-9.4	2	1	39
1079	LMST01010144	22R-hydroxycholesterol(d7)	Chol$Sterols	-9.4	1	2	102
1080	ZINC000001653270		Metab	-9.4	0	0	62
1081	ZINC000001531127		Metab	-9.4	2	1	43
1082	ZINC000257476012		Metab	-9.4	0	3	114
1083	ZINC000000120273		Metab	-9.4	1	0	32
1084	ZINC000001530947		FDA	-9.4	2	0	34
1085	LMST04030055	-	Sterol_Lipids	-9.4	2	1	102
1086	ZINC000253616141		Metab	-9.4	2	1	98
1087	LMST04010080	-	Sterol_Lipids	-9.4	0	1	86
1088	ZINC000056874533		Metab	-9.4	0	2	101
1089	ZINC000000016154		FDA	-9.4	1	0	45
1090	ZINC000022062286		Metab	-9.4	2	0	53
1091	ZINC000035653009		FDA	-9.4	1	0	53
1092	ZINC000014813714		Metab	-9.4	1	0	47
1093	LMST02020117	3,17-dihydroxy-5,9-dioxo-4,5-9,10-diseco-androsta-1(10),2-dien-4-oic acid	Androgens$Steroids$Sterol_Lipids	-9.4	5	0	71
1094	LMST04010188	-	Sterol_Lipids	-9.4	2	3	84
1095	ZINC000256433948		FDA	-9.4	1	0	67
1096	ZINC000012494006		Metab	-9.4	0	2	82
1097	ZINC000000901393		Metab	-9.3	2	1	66
1098	ZINC000000402719		Metab	-9.3	1	0	57
1099	LMST04010174	-	Sterol_Lipids	-9.3	0	0	80
1100	LMST02030196	-	Steroids$Sterol_Lipids	-9.3	3	3	63
1101	LMST02030129	Hydrocortisone caproate	Steroids$Sterol_Lipids	-9.3	0	4	125
1102	LMST01010009	5,6beta-epoxy-cholesterol(d7)	Chol$Sterols	-9.3	0	3	99
1103	ZINC000014505068		Metab	-9.3	3	0	51
1104	LMST04010063	-	Sterol_Lipids	-9.3	2	4	80
1105	ZINC000014717651		Metab	-9.3	0	2	56
1106	LMST04010042	Isodeoxycholic acid	Sterol_Lipids	-9.3	1	2	75
1107	LMST04010082	-	Sterol_Lipids	-9.3	1	0	82
1108	ZINC000067665085		World_NOT_FDA	-9.3	0	3	96
1109	ZINC000002008866		FDA	-9.3	1	0	44
1110	LMST01160000	Withanolide skeleton	Sterols	-9.3	0	5	101
1111	ZINC000043206370		FDA	-9.3	0	0	55
1112	ZINC000257402288		Metab	-9.3	2	0	86
1113	LMST01010164	(24R)-24-hydroxycholesterol	Chol$Sterols	-9.3	2	5	106
1114	ZINC000000968077		Metab	-9.3	0	0	33
1115	ZINC000018847036		Metab	-9.3	0	0	30
1116	LMST01031085	Conicasterol B	Erg$Sterols	-9.3	0	3	100
1117	LMST02030026	Aldosterone	Estrogens$Steroids$Sterol_Lipids	-9.3	3	2	64
1118	ZINC000100027531		FDA	-9.3	1	0	47
1119	ZINC000100009278		FDA	-9.3	2	0	46
1120	LMST04010273	-	Sterol_Lipids	-9.3	3	2	84
1121	ZINC000002384970		Metab	-9.3	0	0	49
1122	ZINC000003927200		FDA	-9.3	1	3	72
1123	ZINC000031318699		Metab	-9.3	5	1	84
1124	ZINC000003014487		Metab	-9.3	3	0	63
1125	ZINC000004252574		Metab	-9.3	4	0	38
1126	LMST03020335	(5E,10E)-19-methylvitamin D3 / (5E,10E)-19-methylcholecalciferol	Sterol_Lipids	-9.3	0	3	99
1127	LMST01010092	24-hydroxy-cholesterol(d6)	Chol$Sterols	-9.3	3	5	108
1128	LMST02020105	4-Androstenediol	Androgens$Steroids$Sterol_Lipids	-9.3	1	1	50
1129	ZINC000001587152		Metab	-9.3	3	3	66
1130	LMST02030132	21-hydroxyallopregnanolone	Steroids$Sterol_Lipids	-9.3	1	0	61
1131	ZINC000095618229		Metab	-9.3	3	0	51
1132	LMST04010245	-	Sterol_Lipids	-9.3	1	2	75
1133	ZINC000012153719		Metab	-9.3	1	2	59
1134	ZINC000014768621		FDA	-9.3	3	0	122
1135	LMST01031020	Delta 8,14 -Sterol	DeltaL$Erg$Sterols	-9.3	1	3	104
1136	ZINC000100771795		Metab	-9.3	1	2	75
1137	ZINC000003831404		FDA	-9.3	3	0	58
1138	ZINC000000901394		Metab	-9.3	2	2	72
1139	LMST04010327	-	Sterol_Lipids	-9.3	0	1	77
1140	ZINC000013449465		World_NOT_FDA	-9.3	0	1	72
1141	LMST04010346	-	Sterol_Lipids	-9.3	1	2	73
1142	ZINC000004282222		Metab	-9.3	1	0	46
1143	LMST02020098	-	Androgens$Steroids$Sterol_Lipids	-9.3	1	1	38
1144	LMST02020097	-	Androgens$Steroids$Sterol_Lipids	-9.3	2	1	38
1145	LMST02030193	18-Hydroxycortisol	Steroids$Sterol_Lipids	-9.3	2	0	72
1146	ZINC000018185774		Metab	-9.3	1	0	46
1147	ZINC000100907004		FDA	-9.3	0	3	89
1148	LMST04030056	-	Sterol_Lipids	-9.3	0	3	99
1149	ZINC000003881977		Metab	-9.3	0	1	44
1150	ZINC000001850101		Metab	-9.3	1	0	34
1151	ZINC000019594557		FDA	-9.3	0	4	91
1152	ZINC000014488318		Metab	-9.3	1	0	33
1153	ZINC000003651513		Metab	-9.3	3	0	55
1154	LMST03010068	Suprasterol II	Sterol_Lipids	-9.3	1	4	108
1155	LMST04030120	-	Sterol_Lipids	-9.3	0	0	86
1156	ZINC000003869768		Metab	-9.3	2	0	32
1157	ZINC000003779067		World_NOT_FDA	-9.3	1	2	54
1158	LMST01040124	Clerosterol	Sterols	-9.3	2	4	113
1159	ZINC000003860325		Metab	-9.3	2	2	99
1160	ZINC000001532099		Metab	-9.3	0	4	81
1161	LMST01040181	Theonellasterol B	Sterols	-9.3	1	4	111
1162	ZINC000100829409		Metab	-9.3	1	3	67
1163	LMST04030145	-	Sterol_Lipids	-9.3	0	2	97
1164	ZINC000005911680		Metab	-9.3	0	0	45
1165	ZINC000090516648		Metab	-9.3	3	0	64
1166	ZINC000257433875		Metab	-9.3	0	0	39
1167	ZINC000004899457		Metab	-9.3	3	0	44
1168	ZINC000006018683		Metab	-9.3	2	0	48
1169	ZINC000014504524		Metab	-9.3	1	0	53
1170	LMST01010387	22-oxocholesterol	Chol$Sterols	-9.3	1	3	100
1171	LMST01040120	7-dehydrositosterol	Sterols	-9.3	0	4	124
1172	ZINC000013130930		Metab	-9.3	0	0	39
1173	LMST02030209	-	Estrogens$Steroids$Sterol_Lipids	-9.3	2	1	50
1174	ZINC000000899853		Metab	-9.3	0	0	42
1175	ZINC000000899106		Metab	-9.3	1	1	53
1176	ZINC000001532100		Metab	-9.3	0	4	78
1177	LMST01031193	-	Erg$Sterols	-9.3	3	3	108
1178	LMST04010316	-	Sterol_Lipids	-9.3	2	1	70
1179	ZINC000095618467		Metab	-9.3	3	0	62
1180	ZINC000003814422		FDA	-9.3	1	1	48
1181	ZINC000003647753		Metab	-9.3	1	0	41
1182	ZINC000000073693		Metab	-9.3	0	0	37
1183	ZINC000004098725		Metab	-9.3	4	0	54
1184	ZINC000004097416		FDA	-9.3	2	2	62
1185	ZINC000014643684		Metab	-9.3	2	0	50
1186	ZINC000000520945		Metab	-9.3	0	0	33
1187	LMST04010040	Deoxycholic acid	Sterol_Lipids	-9.3	1	0	75
1188	ZINC000001684139		Metab	-9.3	0	0	59
1189	LMST01040267	24-ethylcoprostanol	Sterols	-9.3	1	4	123
1190	ZINC000002097391		Metab	-9.3	3	1	95
1191	ZINC000000898283		Metab	-9.3	0	0	29
1192	LMST01010335	-	Chol$Sterols	-9.3	1	0	112
1193	ZINC000013540519		FDA	-9.3	1	1	72
1194	LMST04010136	-	Sterol_Lipids	-9.3	0	3	68
1195	ZINC000100257577		Metab	-9.3	2	2	109
1196	LMST05020005	Estradiol-17beta 3-sulfate	Sterol_Lipids	-9.3	1	3	54
1197	LMST01031107	-	Erg$Sterols	-9.3	2	5	115
1198	ZINC000003647751		Metab	-9.3	0	0	39
1199	LMST02030134	5alpha-dihydrodeoxycorticosterone	Estrogens$Steroids$Sterol_Lipids	-9.3	2	0	58
1200	LMST04010388	-	Sterol_Lipids	-9.3	0	3	76
1201	LMST04010214	-	Sterol_Lipids	-9.3	1	1	82
1202	ZINC000001026053		Metab	-9.3	0	0	28
1203	ZINC000002561118		Metab	-9.3	3	0	52
1204	ZINC000257433876		Metab	-9.3	0	0	40
1205	ZINC000006092209		Metab	-9.3	1	0	39
1206	LMST04010255	-	Sterol_Lipids	-9.3	0	2	80
1207	ZINC000015116031		Metab	-9.3	0	0	32
1208	LMST02030167	21-hydroxypregnenolone	Steroids$Sterol_Lipids	-9.3	3	0	56
1209	LMST04010278	-	Sterol_Lipids	-9.3	0	0	82
1210	ZINC000018847044		Metab	-9.3	1	0	39
1211	ZINC000028817821		Metab	-9.3	1	1	95
1212	ZINC000013130926		Metab	-9.3	2	0	56
1213	ZINC000004095501		Metab	-9.3	2	0	47
1214	ZINC000015258076		Metab	-9.3	1	0	58
1215	ZINC000001532098		Metab	-9.3	0	5	80
1216	LMST01030123	-	Erg$Sterols	-9.3	0	2	105
1217	ZINC000009212668		Metab	-9.3	0	0	55
1218	ZINC000001669780		Metab	-9.3	0	0	31
1219	ZINC000003781943		FDA	-9.3	2	0	89
1220	ZINC000001636654		Metab	-9.3	0	0	37
1221	ZINC000022062283		Metab	-9.3	1	1	46
1222	ZINC000014504521		Metab	-9.3	0	0	50
1223	ZINC000013827980		Metab	-9.3	1	2	53
1224	ZINC000005273983		Metab	-9.3	1	0	60
1225	LMST01010016	Desmosterol	Chol$Sterols	-9.3	1	4	101
1226	ZINC000004099200		FDA	-9.3	3	0	56
1227	ZINC000004806203		Metab	-9.3	0	0	48
1228	ZINC000014505065		Metab	-9.3	3	0	47
1229	ZINC000100771793		Metab	-9.3	1	2	77
1230	LMST01010295	-	Chol$Sterols	-9.3	0	1	91
1231	ZINC000000001154		Metab	-9.3	1	0	54
1232	ZINC000003875484		FDA	-9.3	0	2	57
1233	LMST01030098	Brassicasterol	Erg$Sterols	-9.3	1	2	111
1234	ZINC000002565773		Metab	-9.3	0	0	33
1235	ZINC000013376492		Metab	-9.3	0	0	79
1236	LMST02010021	-	Steroids$Sterol_Lipids	-9.3	1	0	36
1237	ZINC000002563650		Metab	-9.3	0	2	69
1238	ZINC000006484602		Metab	-9.3	1	1	49
1239	LMST04010052	-	Sterol_Lipids	-9.3	1	3	85
1240	ZINC000006018386		Metab	-9.3	1	0	43
1241	LMST01030097	Campesterol	Erg$Sterols	-9.3	1	4	115
1242	ZINC000006036227		Metab	-9.3	1	0	75
1243	ZINC000067664978		World_NOT_FDA	-9.3	1	1	82
1244	ZINC000100036760		FDA	-9.3	1	0	46
1245	LMST02020025	Fluoxymesterone	Androgens$Steroids$Sterol_Lipids	-9.3	0	1	55
1246	LMST01040141	-	Sterols	-9.3	0	3	113
1247	ZINC000034275400		Metab	-9.3	1	0	50
1248	LMST04010157	-	Sterol_Lipids	-9.3	1	2	78
1249	LMST05030013	Tetrahydrodeoxycorticosterone	Sterol_Lipids	-9.3	1	0	60
1250	ZINC000005158937		Metab	-9.3	1	0	73
1251	LMST05030014	Tetrahydrodeoxycortisol	Steroids$Sterol_Lipids	-9.3	2	1	69
1252	LMST04060013	-	Sterol_Lipids	-9.3	0	2	71
1253	ZINC000253497337		Metab	-9.3	4	2	87
1254	ZINC000002563647		Metab	-9.3	1	0	39
1255	LMST01040271	Saringosterone	Sterols	-9.3	0	2	110
1256	LMST03020010	22-hydroxy-23,24,25,26,27-pentanorvitamin D3 / 22-hydroxy-23,24,25,26,27-pentanorcholecalciferol	Sterol_Lipids	-9.3	3	0	68
1257	LMST04010218	-	Sterol_Lipids	-9.3	2	1	88
1258	LMST01040255	fucosterol	Sterols	-9.3	1	3	112
1259	ZINC000005273978		Metab	-9.3	0	0	50
1260	ZINC000014505997		Metab	-9.3	2	0	67
1261	LMST04010277	-	Sterol_Lipids	-9.3	1	2	76
1262	ZINC000253609461		Metab	-9.3	1	5	105
1263	ZINC000030725719		Metab	-9.3	3	2	104
1264	ZINC000005998641		Metab	-9.3	0	0	40
1265	ZINC000003830218		FDA	-9.3	2	0	58
1266	LMST01010098	Epi-cholestanol	Chol$Sterols	-9.3	0	2	93
1267	ZINC000000004935		Metab	-9.3	0	0	37
1268	LMST01010299	24-keto-25dehydrocholesterol	Chol$Sterols	-9.3	2	3	102
1269	LMST02030205	Pregn-5-ene-3beta,20alpha-diol	DeltaL$Steroids$Sterol_Lipids	-9.3	3	2	65
1270	ZINC000005761088		Metab	-9.2	0	2	89
1271	ZINC000013781916		Metab	-9.2	1	6	69
1272	ZINC000006093219		Metab	-9.2	3	0	32
1273	LMST01030102	Ergostanol	Erg$Sterols	-9.2	2	3	102
1274	LMST04020036	Dihomohyodeoxycholic acid	Sterol_Lipids	-9.2	0	0	97
1275	ZINC000000901041		Metab	-9.2	0	0	57
1276	ZINC000014819210		Metab	-9.2	0	0	71
1277	ZINC000014642912		Metab	-9.2	0	0	48
1278	LMST02020042	5alpha-dihydrotesosterone	Androgens$Steroids$Sterol_Lipids	-9.2	0	1	52
1279	ZINC000014820400		Metab	-9.2	2	0	41
1280	ZINC000000900187		Metab	-9.2	1	0	62
1281	ZINC000001997859		Metab	-9.2	0	0	49
1282	LMST01010228	-	Chol$Sterols	-9.2	1	3	113
1283	LMST04010310	-	Sterol_Lipids	-9.2	1	0	80
1284	LMST02030175	3alpha-hydroxy-5beta-pregnan-20-one	Estrogens$Steroids$Sterol_Lipids	-9.2	0	1	62
1285	ZINC000100036751		FDA	-9.2	2	0	47
1286	LMST04010380	-	Sterol_Lipids	-9.2	0	5	77
1287	LMST04010023	-	Sterol_Lipids	-9.2	1	3	82
1288	ZINC000015121960		Metab	-9.2	0	0	44
1289	ZINC000006092198		Metab	-9.2	1	0	48
1290	ZINC000013376981		Metab	-9.2	1	0	44
1291	LMST04010435	-	Sterol_Lipids	-9.2	2	2	74
1292	ZINC000006484607		Metab	-9.2	1	0	43
1293	ZINC000000039092		Metab	-9.2	0	0	53
1294	LMST01040122	Clionasterol	Sterols	-9.2	1	3	117
1295	ZINC000014728044		Metab	-9.2	0	2	49
1296	LMST03020151	(22Z)-1beta-hydroxy-22,23-didehydrovitamin D3 / (22Z)-1beta-hydroxy-22,23-didehydrocholecalciferol	Sterol_Lipids	-9.2	2	3	99
1297	ZINC000004213653		Metab	-9.2	1	0	42
1298	ZINC000014814969		Metab	-9.2	1	1	51
1299	ZINC000014690030		Metab	-9.2	3	1	76
1300	ZINC000000039091		Metab	-9.2	0	1	51
1301	ZINC000004538042		Metab	-9.2	1	0	39
1302	ZINC000003833823		Metab	-9.2	3	1	56
1303	ZINC000002004481		Metab	-9.2	1	0	63
1304	LMST04010386	-	Sterol_Lipids	-9.2	0	4	83
1305	ZINC000085592952		Metab	-9.2	2	0	51
1306	ZINC000005273982		Metab	-9.2	0	0	63
1307	ZINC000014717652		Metab	-9.2	0	2	54
1308	ZINC000014728045		Metab	-9.2	0	0	49
1309	61V		PDB	-9.2	0	0	80
1310	LMST02010032	2-Hydroxyestrone	Steroids$Sterol_Lipids	-9.2	0	0	48
1311	ZINC000034290144		Metab	-9.2	2	1	43
1312	ZINC000005854353		Metab	-9.2	0	1	56
1313	LMST02010001	Beta-estradiol	Steroids$Sterol_Lipids	-9.2	0	1	37
1314	LMST04020035	Dihomolithocholic acid	Sterol_Lipids	-9.2	0	0	89
1315	ZINC000101705819		Metab	-9.2	1	0	33
1316	ZINC000001704714		Metab	-9.2	1	0	42
1317	ZINC000014820415		Metab	-9.2	0	0	39
1318	LMST01030114	24-epibrassicasterol	Erg$Sterols	-9.2	1	3	110
1319	LMST03010014	(5E)-vitamin D2 / 5,6-trans-vitamin D2 / (5E)-Ergocalciferol / (5E)-ercalciol	Sterol_Lipids	-9.2	0	2	106
1320	ZINC000004655107		Metab	-9.2	1	1	62
1321	ZINC000012493582		Metab	-9.2	1	1	88
1322	ZINC000001638007		Metab	-9.2	0	0	36
1323	ZINC000014442550		Metab	-9.2	2	2	53
1324	ZINC000031771385		Metab	-9.2	0	0	43
1325	ZINC000013860547		Metab	-9.2	3	1	63
1326	ZINC000000519080		Metab	-9.2	0	0	36
1327	ZINC000003898703		Metab	-9.2	2	0	36
1328	ZINC000006037057		Metab	-9.2	0	0	57
1329	ZINC000006036235		Metab	-9.2	1	2	81
1330	LMST01030126	6-Deoxotyphasterol	Erg$Sterols	-9.2	2	5	126
1331	LMST03020227	toxisterol3 E1	Sterol_Lipids	-9.2	1	3	85
1332	ZINC000006093399		Metab	-9.2	2	0	31
1333	ZINC000001638005		Metab	-9.2	1	0	36
1334	ZINC000013533861		Metab	-9.2	2	0	48
1335	ZINC000248267900		Metab	-9.2	1	3	125
1336	ZINC000012494068		Metab	-9.2	0	3	92
1337	ZINC000014824980		Metab	-9.2	1	0	54
1338	ZINC000014824074		Metab	-9.2	1	0	81
1339	ZINC000004214603		FDA	-9.2	2	1	79
1340	LMST02010004	Estrone	Steroids$Sterol_Lipids	-9.2	1	1	48
1341	ZINC000257420579		Metab	-9.2	2	2	110
1342	ZINC000002384327		Metab	-9.2	0	2	63
1343	ZINC000014727569		Metab	-9.2	1	5	116
1344	ZINC000001003581		Metab	-9.2	0	0	32
1345	ZINC000001530948		FDA	-9.2	1	0	28
1346	ZINC000014762969		Metab	-9.2	0	2	64
1347	ZINC000238778596		Metab	-9.2	3	2	107
1348	ZINC000014610077		Metab	-9.2	1	0	52
1349	ZINC000006484599		Metab	-9.2	1	0	50
1350	ZINC000014454692		Metab	-9.2	0	0	63
1351	ZINC000006067916		World_NOT_FDA	-9.2	2	5	62
1352	LMST02010050	-	Steroids$Sterol_Lipids	-9.2	0	0	42
1353	ZINC000004655105		Metab	-9.2	1	1	63
1354	ZINC000014687878		Metab	-9.2	1	2	77
1355	ZINC000077285163		Metab	-9.2	6	1	59
1356	ZINC000014725429		Metab	-9.2	0	0	41
1357	ZINC000006094354		FDA	-9.2	0	1	52
1358	LMST04010139	-	Sterol_Lipids	-9.2	0	0	78
1359	LMST02020028	Methenolone	Androgens$Steroids$Sterol_Lipids	-9.2	1	2	59
1360	ZINC000035653092		Metab	-9.2	4	1	55
1361	ZINC000018847034		Metab	-9.2	0	0	25
1362	ZINC000004098735		Metab	-9.2	2	2	105
1363	ZINC000005273981		Metab	-9.2	0	0	63
1364	ZINC000014642862		Metab	-9.2	0	1	92
1365	ZINC000040164529		Metab	-9.2	1	4	76
1366	ZINC000238740518		Metab	-9.2	0	0	35
1367	ZINC000003819459		Metab	-9.2	2	1	55
1368	LMST04030223	(25S)-delta(1,7)-dafachronic acid	DeltaL$Sterol_Lipids	-9.2	1	2	98
1369	LMST02030143	Tetrahydrocortisol	Steroids$Sterol_Lipids	-9.2	1	2	68
1370	ZINC000014952116		Metab	-9.2	5	1	134
1371	LMST02030089	17alpha-hydroxypregnenolone	Estrogens$Steroids$Sterol_Lipids	-9.2	1	0	55
1372	ZINC000004654842		Metab	-9.2	1	1	106
1373	ZINC000003914810		FDA	-9.2	1	4	76
1374	ZINC000000025958		FDA	-9.2	1	0	52
1375	LMST02010028	4-hydroxyestradiol	Steroids$Sterol_Lipids	-9.2	0	1	40
1376	ZINC000001530637		FDA	-9.2	0	0	44
1377	ZINC000253532365		Metab	-9.2	2	2	74
1378	LMST04010367	-	Sterol_Lipids	-9.2	0	3	78
1379	ZINC000005722488		Metab	-9.2	1	1	67
1380	ZINC000014727929		Metab	-9.2	0	0	32
1381	ZINC000014824974		Metab	-9.2	0	0	63
1382	LMST04060023	Norlithocholic acid	Sterol_Lipids	-9.2	1	3	65
1383	LMST04010385	-	Sterol_Lipids	-9.2	0	0	83
1384	LMST02030192	11-Dehydrocorticosterone	Steroids$Sterol_Lipids	-9.2	1	0	69
1385	LMST04010405	-	Sterol_Lipids	-9.2	1	1	76
1386	ZINC000257602943		Metab	-9.2	4	4	111
1387	LMST04060024	Norhyodeoxycholic acid	Sterol_Lipids	-9.2	1	1	78
1388	ZINC000256518822		Metab	-9.2	1	6	114
1389	LMST01010231	-	Chol$Sterols	-9.2	2	3	106
1390	ZINC000014652231		Metab	-9.2	0	0	46
1391	ZINC000033949373		Metab	-9.2	3	4	68
1392	ZINC000004654623		Metab	-9.2	1	0	37
1393	ZINC000014727602		Metab	-9.2	0	5	105
1394	LMST02010027	2-hydroxyestradiol	Steroids$Sterol_Lipids	-9.2	1	1	51
1395	ZINC000014642871		Metab	-9.2	2	1	98
1396	ZINC000000057675		Metab	-9.2	1	0	30
1397	ZINC000014824077		Metab	-9.2	1	0	78
1398	ZINC000004403043		Metab	-9.2	1	0	68
1399	ZINC000013515185		Metab	-9.2	2	0	44
1400	LMST01010094	-	Chol$Sterols	-9.2	2	2	112
1401	ZINC000085933459		Metab	-9.2	0	0	34
1402	ZINC000014824978		Metab	-9.2	1	0	54
1403	ZINC000014642868		Metab	-9.2	2	1	97
1404	ZINC000256073695		Metab	-9.2	4	1	120
1405	LMST04070031	Homodeoxycholic acid	Sterol_Lipids	-9.2	2	3	88
1406	ZINC000013507165		Metab	-9.2	0	1	95
1407	ZINC000014763050		Metab	-9.2	1	0	78
1408	ZINC000004096207		Metab	-9.2	6	1	81
1409	ZINC000006018691		Metab	-9.2	1	0	44
1410	ZINC000005999088		Metab	-9.2	1	0	58
1411	ZINC000002518378		Metab	-9.2	1	0	37
1412	LMST01010254	-	Chol$Sterols	-9.2	2	2	102
1413	LMST01010176	14-demethyllanosterol	Chol$Sterols	-9.2	1	3	105
1414	ZINC000003819461		Metab	-9.2	2	0	57
1415	ZINC000036375370		Metab	-9.2	2	0	78
1416	ZINC000006484598		Metab	-9.2	2	0	47
1417	ZINC000014727931		Metab	-9.2	1	0	38
1418	LMST04010320	-	Sterol_Lipids	-9.2	1	0	82
1419	ZINC000000000346		FDA	-9.2	2	1	64
1420	LMST04010112	-	Sterol_Lipids	-9.2	0	2	78
1421	ZINC000001638008		Metab	-9.2	1	0	36
1422	LMST01010309	20S-Hydroxycholest-1-en-3,16-dione	Chol$Sterols	-9.2	2	3	101
1423	ZINC000000003876		FDA	-9.2	1	1	57
1424	ZINC000004097950		Metab	-9.2	0	2	58
1425	LMST03020311	1alpha-hydroxy-22-(4-hydroxyphenyl)-23,24,25,26,27-pentanorvitamin D3 / 1alpha-hydroxy-22-(4-hydroxyphenyl)-23,24,25,26,27-pentanorcholecalciferol	Sterol_Lipids	-9.2	0	0	112
1426	LMST04010342	-	Sterol_Lipids	-9.2	1	3	73
1427	ZINC000002391144		Metab	-9.2	1	0	43
1428	ZINC000014824079		Metab	-9.2	1	0	75
1429	ZINC000000000323		FDA	-9.2	0	0	31
1430	ZINC000013376493		Metab	-9.2	0	0	76
1431	ZINC000006093290		Metab	-9.2	2	0	30
1432	LMST04010210	-	Sterol_Lipids	-9.2	0	3	75
1433	ZINC000004676424		FDA	-9.2	2	0	62
1434	ZINC000004245608		Metab	-9.2	0	0	49
1435	LMST02030157	3-hydroxy-5beta-pregnan-20-one	Estrogens$Steroids$Sterol_Lipids	-9.2	0	2	58
1436	ZINC000014589773		Metab	-9.2	0	0	42
1437	LMST01031057	-	Erg$Sterols	-9.2	1	4	99
1438	ZINC000006484601		Metab	-9.2	2	0	45
1439	LMST01010019	24S-hydroxy-cholesterol	Chol$Sterols	-9.2	3	4	102
1440	LMST02030202	Pregnanediol	Estrogens$Steroids$Sterol_Lipids	-9.2	1	1	65
1441	ZINC000085933453		Metab	-9.2	0	0	34
1442	ZINC000035454640		Metab	-9.2	2	0	90
1443	ZINC000002558953		Metab	-9.2	1	0	67
1444	ZINC000004096445		Metab	-9.1	3	1	51
1445	LMST01130071	-	Sterols	-9.1	2	3	68
1446	ChEBI_93007		Agonists-Antagonists	-9.1	0	0	61
1447	ZINC000014504375		Metab	-9.1	1	0	51
1448	LMST04020031	Dihomodeoxycholic acid	Sterol_Lipids	-9.1	0	2	93
1449	LMST04010222	-	Sterol_Lipids	-9.1	1	3	73
1450	LMST01031117	-	Erg$Sterols	-9.1	1	0	112
1451	ZINC000004475328		Metab	-9.1	1	1	72
1452	ZINC000000001368		Metab	-9.1	3	0	55
1453	LMST02030100	Tetrahydrocorticosterone	Steroids$Sterol_Lipids	-9.1	2	3	73
1454	ZINC000001871561		Metab	-9.1	1	0	45
1455	LMST04010051	-	Sterol_Lipids	-9.1	1	4	94
1456	ZINC000001865985		Metab	-9.1	1	0	56
1457	ZINC000000643114		FDA	-9.1	2	2	48
1458	ZINC000000900047		Metab	-9.1	0	3	105
1459	ZINC000002558134		Metab	-9.1	2	0	28
1460	ZINC000000397608		Metab	-9.1	1	0	37
1461	ZINC000005760164		Metab	-9.1	3	0	63
1462	ZINC000001658901		Metab	-9.1	1	0	45
1463	ZINC000004213659		Metab	-9.1	0	0	61
1464	ZINC000001587150		Metab	-9.1	2	0	89
1465	ZINC000059588219		Metab	-9.1	4	1	70
1466	LMST04010230	-	Sterol_Lipids	-9.1	0	2	75
1467	ZINC000015776559		Metab	-9.1	0	0	78
1468	LMST01110018	-	Sterols	-9.1	1	4	97
1469	LMST01010197	4alpha-methylcholest-8-en-3beta-ol	Chol$Sterols	-9.1	1	2	103
1470	ZINC000000056756		Metab	-9.1	3	0	40
1471	ZINC000000000973		FDA	-9.1	2	0	44
1472	ZINC000011680913		Metab	-9.1	2	0	56
1473	ZINC000013359966		Metab	-9.1	1	0	35
1474	ZINC000013548872		Metab	-9.1	0	1	110
1475	ZINC000000968311		FDA	-9.1	0	0	49
1476	LMST01031106	-	Erg$Sterols	-9.1	1	4	116
1477	LMST02030206	Pregn-5-ene-3beta,20beta-diol	Steroids$Sterol_Lipids	-9.1	4	4	56
1478	ZINC000001530688		FDA	-9.1	1	1	55
1479	ZINC000002585906		Metab	-9.1	0	0	66
1480	ZINC000001530981		FDA	-9.1	0	1	55
1481	ZINC000000338222		Metab	-9.1	0	0	34
1482	LMST01010133	24-oxocholesterol	Chol$Sterols	-9.1	1	3	102
1483	ZINC000022116612		FDA	-9.1	0	0	53
1484	LMST04010107	Avicholic acid	Sterol_Lipids	-9.1	0	1	91
1485	ZINC000001530638		FDA	-9.1	0	0	51
1486	ZINC000003995405		Metab	-9.1	0	1	61
1487	LMST04010185	-	Sterol_Lipids	-9.1	2	2	88
1488	ZINC000002384770		Metab	-9.1	3	0	56
1489	ZINC000261494688		World_NOT_FDA	-9.1	1	1	49
1490	ZINC000004533517		Metab	-9.1	3	0	42
1491	ZINC000001997861		Metab	-9.1	0	0	52
1492	LMST04010384	-	Sterol_Lipids	-9.1	0	2	79
1493	LMST01031051	4alpha-demethyldinosterol	Erg$Sterols	-9.1	1	5	116
1494	LMST04010219	-	Sterol_Lipids	-9.1	3	3	84
1495	LMST01010354	4beta-OH-7-DHC	Chol$Sterols	-9.1	1	2	103
1496	ZINC000000901951		Metab	-9.1	1	0	46
1497	ZINC000000155651		Metab	-9.1	1	0	59
1498	LMST04010365	-	Sterol_Lipids	-9.1	0	2	68
1499	ZINC000000003911		FDA	-9.1	1	0	57
1500	ZINC000095619105		FDA	-9.1	0	0	72
1501	LMST04010280	-	Sterol_Lipids	-9.1	1	1	91
1502	ZINC000002526197		Metab	-9.1	0	0	49
1503	LMST01010274	19-hydroxycholesterol	Chol$Sterols	-9.1	2	3	109
1504	LMST02020070	-	Androgens$Steroids$Sterol_Lipids	-9.1	0	0	53
1505	ZINC000003869685		Metab	-9.1	3	0	44
1506	LMST04010196	-	Sterol_Lipids	-9.1	1	3	71
1507	ZINC000004083557		World_NOT_FDA	-9.1	2	4	73
1508	ZINC000035801098		FDA	-9.1	2	1	83
1509	LMST01010481	Calibagenin	Chol$Sterol_Lipids	-9.1	2	4	111
1510	LMST04010071	-	Sterol_Lipids	-9.1	2	1	90
1511	ZINC000014756811		Metab	-9.1	2	0	37
1512	LMST01010088	27-hydroxy-cholesterol(25R)	Chol$Sterols	-9.1	1	3	108
1513	LMST03010034	(6R)-vitamin D2 6,19-sulfur dioxide adduct / (6R)-Ergocalciferol 6,19-sulfur dioxide adduct	Sterol_Lipids	-9.1	1	1	109
1514	ZINC000004097193		Metab	-9.1	2	0	34
1515	ZINC000050027015		Metab	-9.1	0	0	47
1516	ZINC000003995410		Metab	-9.1	1	1	65
1517	LMST01040256	halosterol A	Sterols	-9.1	0	2	106
1518	ZINC000013374370		Metab	-9.1	3	0	42
1519	ZINC000003876136		FDA	-9.1	3	1	69
1520	ZINC000000899851		Metab	-9.1	1	1	43
1521	ZINC000013517910		Metab	-9.1	0	0	57
1522	LMST02010006	-	Steroids$Sterol_Lipids	-9.1	0	0	48
1523	ZINC000006483721		Metab	-9.1	2	1	64
1524	LMST02030184	11alpha-hydroxyprogesterone	Steroids$Sterol_Lipids	-9.1	0	2	58
1525	ZINC000014728401		Metab	-9.1	0	0	43
1526	ZINC000006094124		Metab	-9.1	1	1	43
1527	ZINC000015115224		Metab	-9.1	0	0	48
1528	LMST04010113	Bitocholic acid	Sterol_Lipids	-9.1	1	4	78
1529	ZINC000014819753		Metab	-9.1	0	0	49
1530	ZINC000001595956		Metab	-9.1	3	0	59
1531	ZINC000014616103		Metab	-9.1	1	2	80
1532	LMST02010026	-	Steroids$Sterol_Lipids	-9.1	1	1	33
1533	ZINC000005274083		Metab	-9.1	2	0	51
1534	ZINC000013544389		Metab	-9.1	4	0	76
1535	ZINC000001997125		FDA	-9.1	2	0	29
1536	LMST04010104	-	Sterol_Lipids	-9.1	1	2	87
1537	ZINC000022055143		Metab	-9.1	4	1	54
1538	ZINC000095616600		FDA	-9.1	2	1	74
1539	LMST02020104	Epietiocholanolone	Androgens$Steroids$Sterol_Lipids	-9.1	0	1	47
1540	LMST04010224	-	Sterol_Lipids	-9.1	1	4	79
1541	LMST01160006	Minabeolide-5	Sterols	-9.1	1	5	91
1542	ZINC000003833872		Metab	-9.1	1	0	25
1543	LMST02020114	9,17-hydroxy-androsta-1,4-dien-3-one	Androgens$Steroids$Sterol_Lipids	-9.1	1	1	46
1544	LMST04060006	-	Sterol_Lipids	-9.1	2	1	67
1545	ZINC000021981288		Metab	-9.1	0	0	49
1546	ZINC000001765815		Metab	-9.1	1	0	32
1547	LMST03020604	1alpha-hydroxy-20-oxo-19,22,23,24,25,26,27-heptanorvitamin D3 / 1alpha-hydroxy-20-oxo-19,22,23,24,25,26,27-heptanorcholecalciferol	Sterol_Lipids	-9.1	3	1	62
1548	ZINC000100038257		Metab	-9.1	2	0	46
1549	ZINC000002030715		Metab	-9.1	0	0	49
1550	ZINC000001529973		Metab	-9.1	8	0	53
1551	LMST03020575	25-hydroxy-1beta-hydroxymethyl-26,27-dimethyl-24a-homo-22,23,24,24a-tetradehydro-3-epivitamin D3 / 25-hydroxy-1beta-hydroxymethyl-26,27-dimethyl-24a-homo-22,23,24,24a-tetradehydro-3-epicholecalciferol	Sterol_Lipids	-9.1	2	1	118
1552	LMST01040131	-	Sterols	-9.1	2	3	116
1553	ZINC000003814395		FDA	-9.1	1	1	63
1554	ZINC000005930819		Metab	-9.1	1	1	58
1555	ZINC000100009280		FDA	-9.1	1	0	47
1556	LMST02020116	3,4,17-trihydroxy-9,10-seco-androsta-1,3,5(10)-triene-9-one	Androgens$Steroids$Sterol_Lipids	-9.1	4	3	65
1557	ZINC000022061293		Metab	-9.1	0	2	93
1558	LMST04010169	-	Sterol_Lipids	-9.1	2	2	84
1559	ZINC000247879072		Metab	-9.1	2	1	73
1560	ZINC000038441341		Metab	-9.1	3	0	58
1561	LMST04010285	-	Sterol_Lipids	-9.1	1	2	78
1562	ZINC000003914811		Metab	-9.1	1	0	86
1563	ZINC000035342789		FDA	-9.1	3	0	29
1564	LMST01031115	22S-hydroxycampesterol	Erg$Sterols	-9.1	3	3	115
1565	ZINC000013334444		Metab	-9.1	1	0	39
1566	LMST01010346	Marthasterone	Chol$Sterols	-9.1	2	4	99
1567	LMST01010307	20S-Hydroxycholestane-3,16-dione	Chol$Sterols	-9.1	2	2	98
1568	LMST04010151	-	Sterol_Lipids	-9.1	2	2	81
1569	LMST01010388	4beta-methyl-zymosterol-4alpha-carboxylic acid	Chol$Sterols	-9.1	1	5	111
1570	ZINC000004654841		Metab	-9.1	1	1	104
1571	ZINC000003956788		FDA	-9.1	0	0	47
1572	ZINC000001871563		Metab	-9.1	2	0	49
1573	LMST01010298	-	Sterols	-9.1	1	3	99
1574	ZINC000136283995		Metab	-9.1	5	2	110
1575	ZINC000000897256		FDA	-9.1	3	0	68
1576	ZINC000013415038		Metab	-9.1	3	1	73
1577	LMST01010230	-	Chol$Sterols	-9.1	1	4	116
1578	ZINC000003927870		FDA	-9.1	2	0	39
1579	ZINC000001865984		Metab	-9.1	0	0	54
1580	ZINC000003204425		Metab	-9.1	1	0	46
1581	LMST04010022	-	Sterol_Lipids	-9.1	0	1	78
1582	ZINC000261494687		Metab	-9.1	1	0	45
1583	ZINC000001865982		Metab	-9.1	0	0	56
1584	LMST01060009	22S,23S-methylenecholesterol	Sterols	-9.1	1	4	116
1585	ZINC000096006009		FDA	-9.1	1	0	39
1586	LMST02010029	Estradiol-17alpha	Steroids$Sterol_Lipids	-9.1	1	1	41
1587	ZINC000004214700		FDA	-9.1	1	1	93
1588	ZINC000015168736		Metab	-9.1	1	0	56
1589	ZINC000001851016		Metab	-9.1	1	0	43
1590	ZINC000022065748		Metab	-9.1	0	1	68
1591	ZINC000000899915		Metab	-9.1	0	0	49
1592	ZINC000013415009		Metab	-9.1	2	1	77
1593	ZINC000001069091		Metab	-9.1	3	0	57
1594	LMST01050021	24E-propylidenecholesterol	Sterols	-9.1	1	4	128
1595	LMST01010147	27-hydroxy-cholesterol(d6)	Chol$Sterols	-9.1	1	4	106
1596	ZINC000004098123		Metab	-9.1	0	0	44
1597	ZINC000002545075		Metab	-9.1	0	0	67
1598	LMST01010200	(20R,22R)-20,22-dihydroxycholesterol	Chol$Sterols	-9.1	2	3	108
1599	LMST04010211	-	Sterol_Lipids	-9.1	0	1	83
1600	ZINC000003801163		FDA	-9.1	0	0	88
1601	LMST04070040	Homomurideoxycholic acid	Sterol_Lipids	-9.1	0	1	87
1602	LMST02010046	16b-Hydroxyestrone	Steroids$Sterol_Lipids	-9.1	2	1	49
1603	ZINC000000968328		FDA	-9.1	1	0	54
1604	ZINC000003964188		Metab	-9.1	1	0	43
1605	LMST01010412	-	Chol$Sterols	-9.1	2	5	108
1606	ZINC000004533516		Metab	-9.1	2	0	41
1607	LMST01010271	3-oxo-7alpha-hydroxycholesterol	Chol$Sterols	-9.1	0	5	109
1608	ZINC000079041147		Metab	-9.1	1	0	58
1609	LMST01030147	-	Erg$Sterols	-9.1	1	3	101
1610	LMST01010356	24S-OH-7-DHC	Chol$Sterols	-9.1	2	3	107
1611	LMST04010021	-	Sterol_Lipids	-9.1	1	1	83
1612	ZINC000013359969		Metab	-9.1	1	0	35
1613	ZINC000003847516		Metab	-9.1	1	0	46
1614	ZINC000004096880		Metab	-9.1	4	0	39
1615	ZINC000247759910		Metab	-9.1	3	3	87
1616	ZINC000014455081		Metab	-9.1	1	0	56
1617	LMST02010053	6-Ketoestriol	Steroids$Sterol_Lipids	-9.1	0	1	42
1618	ZINC000005140888		Metab	-9.1	2	0	60
1619	ZINC000004096764		Metab	-9.1	2	5	74
1620	ZINC000000897222		FDA	-9.1	3	1	71
1621	LMST01031159	Calvasterol A	Erg$Sterols	-9.1	1	2	100
1622	ZINC000261494685		Metab	-9.1	1	0	47
1623	LMST02030186	corticosterone	Steroids$Sterol_Lipids	-9.1	0	1	67
1624	ZINC000014690032		Metab	-9.1	3	0	86
1625	ZINC000100037020		FDA	-9.1	2	0	49
1626	ZINC000002575496		Metab	-9.1	1	0	37
1627	ZINC000000901461		Metab	-9.1	2	0	54
1628	ZINC000005434436		World_NOT_FDA	-9.1	0	1	55
1629	ZINC000014728402		Metab	-9.1	0	0	42
1630	ZINC000003823475		FDA	-9.1	1	0	94
1631	ZINC000006525249		Metab	-9.1	1	1	30
1632	ZINC000003812851		FDA	-9.1	1	0	54
1633	ZINC000015120456		Metab	-9.1	1	0	51
1634	ZINC000014642865		Metab	-9.1	1	0	98
1635	ZINC000022055131		Metab	-9.1	3	0	52
1636	LMST04010428	-	Sterol_Lipids	-9.1	0	1	105
1637	ZINC000004742853		Metab	-9.1	1	2	63
1638	LMST02020059	-	Androgens$Steroids$Sterol_Lipids	-9.1	0	2	56
1639	LMST01010305	(24Z)-24,26-dimethyldesmosterol	Chol$Sterols	-9.1	1	4	109
1640	LMST04010257	-	Sterol_Lipids	-9.1	0	2	82
1641	LMST04060007	-	Sterol_Lipids	-9.1	0	0	76
1642	ZINC000022055139		Metab	-9.1	2	0	50
1643	ZINC000012495255		Metab	-9.1	1	0	50
1644	LMST01010171	zymosterol intermediate 1b	Chol$Sterols	-9.1	1	2	104
1645	LMST01031114	-	Erg$Sterols	-9.1	2	3	109
1646	LMST03010037	(6S)-6,19-epidioxy-6,19-dihydrovitamin D2 / (6S)-6,19-epidioxy-6,19-dihydroErgocalciferol	Sterol_Lipids	-9.1	0	3	109
1647	ZINC000001677832		Metab	-9.1	0	0	51
1648	ZINC000000899848		Metab	-9.1	1	1	46
1649	ZINC000014811594		Metab	-9.1	2	0	39
1650	LMST03020223	tachysterol3	Sterol_Lipids	-9.1	0	2	107
1651	LMST01040249	beta-Sitostenone	Sterols	-9.1	0	4	97
1652	ZINC000002037536		Metab	-9.1	1	2	84
1653	ZINC000003782818		FDA	-9.1	1	1	104
1654	LMST01010169	zymosterol intermediate 1a	Chol$Sterols	-9.1	1	4	103
1655	ZINC000000056757		Metab	-9.1	2	0	37
1656	ZINC000261494686		Metab	-9.1	1	0	46
1657	LMST04030143	-	Sterol_Lipids	-9.1	1	1	107
1658	ZINC000000899200		Metab	-9.1	2	0	65
1659	LMST01010145	22S-hydroxycholesterol(d7)	Chol$Sterols	-9.1	4	4	107
1660	LMST04010106	Dehydrocholic acid	Sterol_Lipids	-9.1	1	2	67
1661	LMST01030116	-	Erg$Sterols	-9.1	1	4	101
1662	ZINC000004533519		Metab	-9.1	1	0	42
1663	ZINC000001662779		Metab	-9.1	4	0	49
1664	ZINC000000057278		FDA	-9.1	2	0	56
1665	ZINC000001559232		Metab	-9.1	0	0	49
1666	ZINC000005283951		Metab	-9.1	0	0	76
1667	ZINC000060094177		Metab	-9.1	10	2	87
1668	ZINC000013374706		Metab	-9.1	1	5	95
1669	ZINC000006358617		Metab	-9.1	2	0	49
1670	ZINC000014821963		Metab	-9.1	1	0	33
1671	ZINC000015263983		Metab	-9.1	1	0	67
1672	LMST01010479	Certonardosterol F	Sterols	-9.1	1	5	109
1673	ZINC000238744777		Metab	-9.1	1	3	73
1674	ZINC000256433952		FDA	-9.1	2	0	59
1675	ZINC000004803379		Metab	-9	1	0	33
1676	ZINC000002383231		Metab	-9	2	2	94
1677	LMST02030088	Pregnenolone	Steroids$Sterol_Lipids	-9	1	0	51
1678	ZINC000003881680		Metab	-9	0	0	46
1679	LMST03020014	1alpha-hydroxy-24,25,26,27-tetranorvitamin D3 / 1alpha-hydroxy-24,25,26,27-tetranorcholecalciferol	Sterol_Lipids	-9	0	0	70
1680	ZINC000012494411		Metab	-9	0	0	79
1681	ZINC000006068778		Metab	-9	0	0	35
1682	ZINC000013540015		Metab	-9	0	2	53
1683	ZINC000016921576		Metab	-9	1	1	53
1684	ZINC000100060558		Metab	-9	1	0	48
1685	ZINC000000008667		FDA	-9	0	0	37
1686	ZINC000086043672		Metab	-9	2	0	75
1687	ZINC000004164657		Metab	-9	1	0	45
1688	ZINC000012343956		Metab	-9	1	0	35
1689	ZINC000001531693		Metab	-9	1	0	39
1690	ZINC000000968078		Metab	-9	2	0	43
1691	ZINC000001747873		Metab	-9	1	0	35
1692	ZINC000014811592		Metab	-9	2	0	38
1693	ZINC000035051052		Metab	-9	2	0	59
1694	ZINC000000097718		Metab	-9	2	0	41
1695	ZINC000002565013		Metab	-9	0	1	33
1696	ZINC000001548097		FDA	-9	0	0	88
1697	LMST02030122	Fludrocortisone acetate	Steroids$Sterol_Lipids	-9	1	1	80
1698	ZINC000000037832		Metab	-9	1	0	38
1699	ZINC000014689152		Metab	-9	1	0	33
1700	ZINC000006483403		Metab	-9	2	0	52
1701	ZINC000000899938		Metab	-9	2	0	59
1702	ZINC000000898356		Metab	-9	0	0	36
1703	ZINC000021983147		Metab	-9	2	1	50
1704	ZINC000261499149		Metab	-9	1	3	112
1705	ZINC000000005423		FDA	-9	2	0	41
1706	LMST03020201	(5E,10E)-19-fluorovitamin D3 / (5E,10E)-19-fluorocholecalciferol	Sterol_Lipids	-9	0	3	104
1707	ZINC000095617907		Metab	-9	2	0	59
1708	LMST01010301	22,23-epoxycampesterol	Chol$Sterols	-9	2	4	110
1709	ZINC000015248711		Metab	-9	4	0	47
1710	ZINC000003814360		World_NOT_FDA	-9	1	1	53
1711	ZINC000004228233		Metab	-9	10	0	82
1712	LMST04010012	-	Sterol_Lipids	-9	0	2	83
1713	LMST04010362	-	Sterol_Lipids	-9	0	2	66
1714	ZINC000014763011		Metab	-9	0	4	69
1715	LMST04050010	Dinorlithocholic acid	Sterol_Lipids	-9	0	0	62
1716	ZINC000000403155		Metab	-9	1	0	42
1717	ZINC000014616102		Metab	-9	1	2	81
1718	LMST04010336	-	Sterol_Lipids	-9	0	4	80
1719	ZINC000257386414		Metab	-9	2	1	85
1720	ZINC000035051048		Metab	-9	2	0	55
1721	ZINC000100037633		Metab	-9	1	0	48
1722	LMST04030219	(25S)-cholestenoic acid	Sterol_Lipids	-9	1	3	109
1723	LMST01010395	(24E),26-hydroxydesmosterol	Chol$Sterols	-9	1	4	107
1724	ZINC000002008019		Metab	-9	0	1	39
1725	LMST01010235	-	Chol$Sterols	-9	2	4	112
1726	LMST03020222	previtamin D3 / precholecalciferol / (6Z)-tacalciol	Sterol_Lipids	-9	2	1	103
1727	LMST02030140	3beta,15beta,17alpha-Trihydroxy-pregnenone	Steroids$Sterol_Lipids	-9	1	3	75
1728	ZINC000000037831		Metab	-9	1	0	38
1729	ZINC000000968074		Metab	-9	0	1	40
1730	LMST01010341	Cryptogenin	Chol$Sterols	-9	2	5	109
1731	LMST02030145	Aldosterone hemiacetal	Steroids$Sterol_Lipids	-9	1	0	72
1732	ZINC000002528486		World_NOT_FDA	-9	1	0	91
1733	ZINC000000058117		Metab	-9	0	0	43
1734	ZINC000000899795		Metab	-9	3	1	51
1735	LMST01040133	Scottenol	Sterols	-9	1	3	122
1736	ZINC000198521225		Metab	-9	0	0	61
1737	ZINC000000899796		Metab	-9	2	1	47
1738	ZINC000003870338		Metab	-9	2	2	40
1739	LMST02010019	-	Steroids$Sterol_Lipids	-9	0	1	43
1740	LMST04010314	-	Sterol_Lipids	-9	2	0	77
1741	LMST02030190	-	Estrogens$Steroids$Sterol_Lipids	-9	0	1	64
1742	ZINC000000901754		Metab	-9	0	0	36
1743	LMST04050011	Dinorhyodeoxycholic acid	Sterol_Lipids	-9	0	0	71
1744	LMST01031111	Nebrosteroid I	Erg$Sterols	-9	1	4	112
1745	ZINC000013403577		Metab	-9	0	0	61
1746	ZINC000002558136		Metab	-9	1	0	31
1747	ZINC000004424205		Metab	-9	2	1	115
1748	ZINC000001721694		Metab	-9	0	0	37
1749	LMST04030061	-	Sterol_Lipids	-9	1	3	100
1750	LMST03020015	(22R)-22-hydroxy-24,25,26,27-tetranorvitamin D3 / (22R)-22-hydroxy-24,25,26,27-tetranorcholecalciferol	Sterol_Lipids	-9	2	1	85
1751	LMST04010299	-	Sterol_Lipids	-9	0	2	83
1752	LMST04060020	Nordeoxycholic acid	Sterol_Lipids	-9	2	4	66
1753	ZINC000000119717		FDA	-9	1	0	30
1754	ZINC000000051924		Metab	-9	1	0	34
1755	LMST04010162	-	Sterol_Lipids	-9	1	2	84
1756	ZINC000005854565		Metab	-9	1	5	116
1757	LMST01040176	-	Sterols	-9	1	2	121
1758	LMST02030166	11beta,17alpha,21-trihydroxypregnenolone	Estrogens$Steroids$Sterol_Lipids	-9	3	2	56
1759	ZINC000001865983		Metab	-9	1	0	57
1760	ZINC000000897908		Metab	-9	1	0	35
1761	ZINC000049601330		Metab	-9	0	1	58
1762	ZINC000014503833		Metab	-9	3	0	62
1763	ZINC000001624462		Metab	-9	2	1	59
1764	LMST01031034	24(28)-dehydroaplysterol	Erg$Sterols	-9	1	6	111
1765	LMST02020053	3beta-androstanediol	Androgens$Steroids$Sterol_Lipids	-9	1	1	50
1766	ZINC000004654839		Metab	-9	1	1	104
1767	ZINC000000407231		Metab	-9	0	0	51
1768	ZINC000014766825		Metab	-9	0	4	66
1769	ZINC000000338284		Metab	-9	0	0	44
1770	ZINC000003925289		Metab	-9	0	0	102
1771	LMST01110011	23,24-dihydro-5alpha-calystanol	Sterols	-9	1	5	105
1772	LMST01031176	Ergosta-4,6,8(14),22E-tetraen-3-one	Erg$Sterols	-9	1	3	99
1773	ZINC000015217369		Metab	-9	2	1	56
1774	ZINC000000968326		FDA	-9	1	0	59
1775	ZINC000095616599		FDA	-9	2	1	74
1776	ZINC000004098468		Metab	-9	0	2	50
1777	ZINC000013328754		Metab	-9	1	0	30
1778	ZINC000100006264		FDA	-9	0	1	51
1779	ZINC000000037830		Metab	-9	1	0	38
1780	LMST01040129	Sitosterol	Sterols	-9	2	3	118
1781	LMST01010077	Dihydrocholesterol	Chol$Sterols	-9	1	2	103
1782	ZINC000019624717		Metab	-9	0	0	37
1783	ZINC000000968076		Metab	-9	0	0	35
1784	LMST03020664	25-Dehydrovitamin D3	Sterol_Lipids	-9	0	0	96
1785	ZINC000014727969		Metab	-9	1	1	83
1786	LMST04010091	-	Sterol_Lipids	-9	2	1	94
1787	LMST04010353	-	Sterol_Lipids	-9	0	0	86
1788	ZINC000013212348		Metab	-9	2	0	49
1789	ZINC000004096945		Metab	-9	1	0	49
1790	LMST02020027	Mestanolone	Androgens$Steroids$Sterol_Lipids	-9	1	3	46
1791	ZINC000015214245		Metab	-9	1	1	77
1792	ZINC000003830339		FDA	-9	1	0	50
1793	ZINC000013553523		Metab	-9	1	0	63
1794	ZINC000001693901		Metab	-9	2	0	40
1795	LMST01010304	(24E)-24,26-dimethyldesmosterol	Chol$Sterols	-9	1	5	111
1796	ZINC000095617867		Metab	-9	0	0	33
1797	ZINC000019624722		Metab	-9	0	0	37
1798	LMST04010412	-	Sterol_Lipids	-9	0	2	84
1799	LMST01010233	-	Chol$Sterols	-9	1	4	113
1800	ZINC000014780845		Metab	-9	2	3	84
1801	LMST01040159	28-methylxestosterol	Sterols	-9	2	5	134
1802	LMST03020018	(5E)-(22S)-22-hydroxy-24,25,26,27-tetranorvitamin D3 / (5E)-(22S)-22-hydroxy-24,25,26,27-tetranorcholecalciferol	Sterol_Lipids	-9	1	1	77
1803	ZINC000012153769		Metab	-9	0	0	38
1804	ZINC000013570997		Metab	-9	0	0	28
1805	ZINC000015121942		Metab	-9	0	0	44
1806	LMST01040277	12alpha-hydroxy Sitosterol	Sterols	-9	2	5	120
1807	ZINC000004098690		Metab	-9	0	0	41
1808	ZINC000004098704		Metab	-9	1	1	36
1809	LMST01040172	24-allenyl-cholesterol	Sterols	-9	1	4	106
1810	LMST03020147	24,25-didehydrovitamin D3 / 24,25-didehydrocholecalciferol	Sterol_Lipids	-9	0	2	96
1811	LMST01160023	Exodeconolide F	Sterols	-9	1	3	102
1812	LMST02030165	poststerone	Estrogens$Steroids$Sterol_Lipids	-9	0	1	72
1813	ZINC000000156701		Metab	-9	0	0	47
1814	ZINC000000538621		FDA	-9	1	2	96
1815	ZINC000014612455		Metab	-9	0	2	71
1816	ZINC000000897002		FDA	-9	1	1	48
1817	ZINC000001554010		FDA	-9	0	0	52
1818	LMST02030174	pregnan-21-ol	Estrogens$Steroids$Sterol_Lipids	-9	0	3	57
1819	ZINC000000527386		FDA	-9	0	1	51
1820	LMST01040195	22S-hydroxysitosterol	Sterols	-9	2	4	126
1821	ZINC000004095506		Metab	-9	3	0	35
1822	LMST01010093	Cholesterol(d7)	Chol$Sterols	-9	1	4	100
1823	ZINC000000901042		Metab	-9	0	0	66
1824	LMST01010207	4,4-dimethyl-5alpha-cholest-7-en-3beta-ol	Chol$Sterols	-9	2	4	109
1825	ZINC000014820468		Metab	-9	0	0	31
1826	ZINC000000895630		Metab	-9	4	1	52
1827	ZINC000003791297		FDA	-9	2	0	67
1828	ZINC000021983149		Metab	-9	2	1	52
1829	LMST04030203	3alpha,12alpha,22S-Trihydroxy-5beta-cholestan-26-oic acid	Sterol_Lipids	-9	1	3	109
1830	LMST04030170	7alpha,24-dihydroxycholest-4-en-3-one	Sterol_Lipids	-9	0	5	104
1831	LMST01040137	-	Sterols	-9	1	3	121
1832	ZINC000013509134		Metab	-9	1	1	44
1833	LMST01031036	25(26)-dehydroaplysterol	Erg$Sterols	-9	2	4	112
1834	LMST03020230	-	Sterol_Lipids	-9	0	1	103
1835	ZINC000015268745		Metab	-9	2	1	47
1836	ZINC000003873295		FDA	-9	0	1	77
1837	ZINC000005141262		Metab	-9	1	0	45
1838	ZINC000006623664		Metab	-9	2	6	82
1839	ZINC000000057255		FDA	-9	2	0	49
1840	LMST02010049	17-Epiestriol	Steroids$Sterol_Lipids	-9	0	0	44
1841	ZINC000013352621		Metab	-9	3	1	54
1842	ZINC000014587259		Metab	-9	3	1	60
1843	ZINC000033965935		Metab	-9	0	0	73
1844	ZINC000001714287		Metab	-9	1	0	48
1845	ZINC000002557432		Metab	-9	1	4	87
1846	ZINC000000002279		FDA	-9	1	0	31
1847	ZINC000004096654		Metab	-9	4	0	66
1848	ZINC000014504530		Metab	-9	1	0	56
1849	ZINC000004340309		Metab	-9	1	4	75
1850	LMST01110013	Nicasterol	Sterols	-9	0	2	105
1851	ZINC000253500867		Metab	-9	2	1	63
1852	ZINC000012495190		Metab	-9	0	4	83
1853	ZINC000014612909		Metab	-9	0	0	65
1854	ZINC000002572528		Metab	-9	2	0	51
1855	ZINC000005976902		Metab	-9	1	4	92
1856	ZINC000002509755		World_NOT_FDA	-9	1	0	83
1857	ZINC000105249481		Metab	-9	0	1	59
1858	ZINC000001721693		Metab	-9	0	0	35
1859	ZINC000085933551		Metab	-9	0	1	84
1860	ZINC000000001016		FDA	-9	1	0	30
1861	ZINC000036387174		Metab	-9	0	0	49
1862	ZINC000014807611		Metab	-9	1	2	46
1863	LMST04010440	-	Sterol_Lipids	-9	0	1	76
1864	ZINC000004655109		Metab	-9	0	1	31
1865	LMST04010172	-	Sterol_Lipids	-9	2	2	94
1866	ZINC000003649853		Metab	-9	1	0	67
1867	LMST04010133	-	Sterol_Lipids	-9	0	2	75
1868	LMST02010013	-	Steroids$Sterol_Lipids	-9	3	0	44
1869	ZINC000000901752		Metab	-9	0	1	34
1870	LMST01031044	Ficisterol	Erg$Sterols	-9	2	2	118
1871	LMST01031066	-	Erg$Sterols	-9	1	4	101
1872	ZINC000000037833		Metab	-9	1	0	38
1873	ZINC000004654840		Metab	-9	1	2	106
1874	ZINC000021981290		Metab	-9	1	0	61
1875	ZINC000015121956		Metab	-9	0	0	47
1876	ZINC000000968301		FDA	-9	0	1	61
1877	ZINC000005784545		Metab	-9	0	0	39
1878	LMST01010132	6,24S-dihydroxycholesterol	Chol$Sterols	-9	1	4	99
1879	ZINC000003929486		FDA	-9	0	0	60
1880	LMST01010001	Cholesterol	Chol$Sterols	-9	1	3	101
1881	ZINC000253916285		Metab	-9	1	0	75
1882	LMST01010386	(24Z),26-hydroxydesmosterol	Chol$Sterols	-9	2	4	108
1883	ZINC000014689153		Metab	-9	1	0	33
1884	LMST02030119	Norgestrel	Estrogens$Steroids$Sterol_Lipids	-9	0	1	59
1885	ZINC000253615812		Metab	-8.9	1	4	86
1886	ZINC000253615811		Metab	-8.9	0	4	90
1887	LMST01031120	3-epi-6-deoxocathasterone	Erg$Sterols	-8.9	0	0	112
1888	LMST01031033	Aplysterol	Erg$Sterols	-8.9	1	7	106
1889	ZINC000014824075		Metab	-8.9	3	0	79
1890	ZINC000004083873		Metab	-8.9	1	0	57
1891	ZINC000014636764		Metab	-8.9	1	1	47
1892	ZINC000003791929		Metab	-8.9	0	3	97
1893	ZINC000015121943		Metab	-8.9	0	0	44
1894	ZINC000014636766		Metab	-8.9	1	1	48
1895	LMST04010101	Haemulcholic acid	Sterol_Lipids	-8.9	0	1	81
1896	ZINC000001576167		Metab	-8.9	0	0	64
1897	ZINC000000000456		FDA	-8.9	2	0	39
1898	ZINC000015248714		Metab	-8.9	2	0	60
1899	ZINC000015120613		Metab	-8.9	3	1	77
1900	ZINC000000900254		Metab	-8.9	2	1	77
1901	ZINC000015121957		Metab	-8.9	0	0	45
1902	ZINC000002008020		Metab	-8.9	0	1	42
1903	ZINC000034051975		Metab	-8.9	4	0	54
1904	LMST05030006	glycodeoxycholic acid	Sterol_Lipids	-8.9	1	3	108
1905	ZINC000306121574		Metab	-8.9	2	3	91
1906	LMST04010035	Isoursodeoxycholic acid	Sterol_Lipids	-8.9	1	0	87
1907	ZINC000014758886		Metab	-8.9	1	0	35
1908	LMST02020071	-	Androgens$Steroids$Sterol_Lipids	-8.9	1	1	56
1909	ZINC000100051400		Metab	-8.9	0	1	54
1910	ZINC000002015151		Metab	-8.9	1	1	42
1911	LMST02030229	beta-Cortol	Steroids$Sterol_Lipids	-8.9	3	2	69
1912	LMST01010400	Micaceol	Chol$Sterols	-8.9	1	3	99
1913	ZINC000000119978		Metab	-8.9	0	0	43
1914	ZINC000004096947		Metab	-8.9	1	0	49
1915	ZINC000006117641		Metab	-8.9	0	0	28
1916	ZINC000002572104		Metab	-8.9	4	0	69
1917	ZINC000253500868		Metab	-8.9	2	1	73
1918	ZINC000014820413		Metab	-8.9	0	0	39
1919	LMST01010297	24-ketocholestanol	Chol$Sterols	-8.9	1	5	102
1920	ZINC000014636762		Metab	-8.9	1	1	50
1921	ZINC000035799632		Metab	-8.9	1	0	30
1922	ZINC000000395626		Metab	-8.9	1	0	37
1923	ZINC000006528354		Metab	-8.9	1	0	58
1924	ZINC000004096451		Metab	-8.9	1	4	117
1925	ZINC000253615813		Metab	-8.9	2	3	88
1926	ZINC000014815122		Metab	-8.9	0	0	46
1927	ZINC000013441012		Metab	-8.9	0	0	34
1928	ZINC000003814418		Metab	-8.9	1	1	53
1929	ZINC000000395627		Metab	-8.9	0	0	30
1930	LMST01010359	15beta-hydroxycholestane	Chol$Sterols	-8.9	1	5	110
1931	ZINC000004026296		Metab	-8.9	3	2	55
1932	ZINC000013481200		Metab	-8.9	0	0	36
1933	ZINC000004098607		Metab	-8.9	1	2	62
1934	ZINC000000395629		Metab	-8.9	0	0	28
1935	LMST04010077	-	Sterol_Lipids	-8.9	0	1	76
1936	LMST02020052	3alpha-androstanediol	Androgens$Steroids$Sterol_Lipids	-8.9	0	1	52
1937	ZINC000005116153		Metab	-8.9	1	1	62
1938	ZINC000013385605		Metab	-8.9	3	1	109
1939	ZINC000001530812		FDA	-8.9	1	1	56
1940	ZINC000014762987		Metab	-8.9	0	0	73
1941	ZINC000050027370		Metab	-8.9	1	0	60
1942	LMST03020165	25-hydroxy-1-oxo-3-epiprevitamin D3 / 25-hydroxy-1-oxo-3-epiprecholecalciferol	Sterol_Lipids	-8.9	2	3	102
1943	ZINC000000119985		Metab	-8.9	0	0	44
1944	ZINC000034205088		Metab	-8.9	1	3	99
1945	ZINC000253591362		Metab	-8.9	0	1	56
1946	ZINC000004026294		Metab	-8.9	2	1	53
1947	ZINC000003918157		Metab	-8.9	1	3	85
1948	ZINC000001715690		Metab	-8.9	0	1	43
1949	LMST04010085	Lagocholic Acid	Sterol_Lipids	-8.9	0	0	86
1950	ZINC000013434357		Metab	-8.9	1	1	74
1951	ZINC000015120480		Metab	-8.9	1	0	41
1952	ZINC000003818808		FDA	-8.9	1	0	56
1953	LMST04010076	-	Sterol_Lipids	-8.9	1	3	85
1954	ZINC000257480396		Metab	-8.9	1	1	46
1955	LMST03020310	1alpha-hydroxy-22-(3-hydroxyphenyl)-23,24,25,26,27-pentanorvitamin D3 / 1alpha-hydroxy-22-(3-hydroxyphenyl)-23,24,25,26,27-pentanorcholecalciferol	Sterol_Lipids	-8.9	0	1	112
1956	LMST04030136	-	Sterol_Lipids	-8.9	0	5	104
1957	ZINC000038563014		Metab	-8.9	1	2	111
1958	ZINC000004474682		FDA	-8.9	1	1	97
1959	ZINC000012405050		Metab	-8.9	2	0	33
1960	LMST01030103	Campestanol	Erg$Sterols	-8.9	1	3	108
1961	ZINC000005761341		Metab	-8.9	0	2	104
1962	ZINC000014819625		Metab	-8.9	0	0	71
1963	LMST04010352	-	Sterol_Lipids	-8.9	2	0	81
1964	ZINC000000968330		FDA	-8.9	2	0	55
1965	ZINC000002008016		Metab	-8.9	0	1	42
1966	ZINC000005116154		Metab	-8.9	1	1	62
1967	LMST01040167	Saringosterol	Sterols	-8.9	1	4	113
1968	LMST01010137	-	Chol$Sterols	-8.9	2	3	103
1969	LMST04010161	-	Sterol_Lipids	-8.9	1	1	75
1970	LMST01110014	Glaucasterol	Sterols	-8.9	1	4	93
1971	ZINC000013587680		FDA	-8.9	2	1	76
1972	ZINC000238735243		Metab	-8.9	1	2	81
1973	ZINC000014820417		Metab	-8.9	0	0	46
1974	ZINC000004490939		Metab	-8.9	5	0	56
1975	LMST01010355	4alpha-OH-7-DHC	Chol$Sterols	-8.9	1	2	95
1976	ZINC000253389932		Metab	-8.9	0	1	58
1977	ZINC000014455080		Metab	-8.9	1	0	58
1978	ZINC000039372299		Metab	-8.9	4	0	59
1979	ZINC000001668225		Metab	-8.9	2	0	54
1980	ZINC000013648755		FDA	-8.9	3	1	58
1981	LMST03020337	(6R)-6-methylvitamin D3 6,19-sulfur dioxide adduct / (6R)-6-methylcholecalciferol 6,19-sulfur dioxide adduct	Sterol_Lipids	-8.9	1	2	113
1982	ZINC000002525300		Metab	-8.9	2	0	48
1983	ZINC000253476027		FDA	-8.9	2	1	55
1984	ZINC000014690442		Metab	-8.9	2	4	116
1985	ZINC000253497338		Metab	-8.9	4	2	100
1986	ZINC000040949810		Metab	-8.9	2	1	51
1987	ZINC000003940470		FDA	-8.9	1	0	45
1988	ZINC000000265473		Metab	-8.9	1	0	73
1989	LMST02030227	alpha-Cortolone	Steroids$Sterol_Lipids	-8.9	2	2	74
1990	ZINC000014612457		Metab	-8.9	2	4	63
1991	ZINC000001576166		Metab	-8.9	1	0	57
1992	LMST01030105	Fungisterol	Erg$Sterols	-8.9	1	2	112
1993	LMST01010138	-	Chol$Sterols	-8.9	1	4	101
1994	ZINC000003872188		Metab	-8.9	5	0	59
1995	ZINC000005999205		Metab	-8.9	2	0	33
1996	ZINC000001995170		Metab	-8.9	0	0	26
1997	LMST04010317	-	Sterol_Lipids	-8.9	3	2	87
1998	ZINC000014807241		Metab	-8.9	0	0	54
1999	LMST05030009	Glycolithocholic Acid	Sterol_Lipids	-8.9	0	1	96
[truncated: 575 more rows]
