# Supplementary material for: Investigation of the Entry Pathway and Molecular Nature of σ1 Receptor Ligands
Source: Int J Mol Sci. 2023 Mar 28;24(7):6367. doi: 10.3390/ijms24076367 (PMC10094450; doi:10.3390/ijms24076367)
Supplement: Supplementary file 1 [file ijms-24-06367-s001.zip › Supplementary-Table-S6_VS-7W2B.xlsx]

## Sheet: 7W2B
	Database ID	Compound name	Ecalc	HB	CL	Contacts
1	YMDB00606	ergosta-5,7,22,24(28)-tetraen-3beta-ol	-11.1	0	1	88
2	YMDB16321	5,7,24(28)-Ergostatrienol	-10.9	0	1	87
3	YMDB00605	ergosta-5,7,24(28)-trien-3beta-ol	-10.4	0	2	91
4	YMDB00543	ergosterol	-10.2	0	4	80
5	YMDB16151	Desmosterol	-10.1	0	3	85
6	YMDB00454	3',5'-cyclic GMP	-10.1	6	2	52
7	YMDB00313	Cholesterol	-10	0	2	95
8	YMDB00186	4-alpha-Methyl-5-alpha-cholest-7-en-3-one	-9.9	0	5	110
9	YMDB00608	zymosterol intermediate 2	-9.9	0	2	91
10	YMDB00293	7,8-Dihydropteroic acid	-9.8	3	0	52
11	YMDB02310	Tehydroabietic acid	-9.8	0	1	58
12	YMDB00548	zymosterol	-9.7	0	2	96
13	YMDB00540	episterol	-9.7	0	2	92
14	YMDB02320	Dehydroergosterol	-9.6	0	3	85
15	YMDB01765	Peonidin	-9.5	3	0	43
16	YMDB00023	3',5'-cyclic AMP	-9.5	4	1	45
17	YMDB01659	Cyanidin	-9.5	1	1	39
18	YMDB01489	7,8-Didehydrodesmosterol	-9.4	0	3	76
19	YMDB01483	2-(6-Hydroxy-2-methoxy-3,4-methylenedioxyphenyl)benzofuran	-9.3	1	0	37
20	YMDB00050	8-Oxo-dGMP	-9.3	3	0	51
21	YMDB00452	3',5'-cyclic dAMP	-9.3	4	0	36
22	YMDB00453	3',5'-cyclic IMP	-9.2	2	0	49
23	YMDB16104	beta-Vetivenene	-9.2	0	0	41
24	YMDB00565	2',3'-cyclic AMP	-8.9	4	0	57
25	YMDB00534	Riboflavin	-8.9	2	0	83
26	YMDB01653	Catechin	-8.9	2	0	66
27	YMDB00451	dAMP	-8.9	2	0	47
28	YMDB00609	3-dehydro-4-methylzymosterol	-8.9	0	4	98
29	YMDB01682	Epigallocatechin	-8.8	4	1	48
30	YMDB00325	2-trans,6-trans-farnesyl diphosphate	-8.8	1	0	65
31	YMDB01720	Isorhamnetin	-8.8	1	0	44
32	YMDB01646	Caftaric acid	-8.7	1	0	59
33	YMDB00545	24-methylidene-5alpha-cholest-8-en-3beta-ol	-8.7	0	4	99
34	YMDB00136	benzil	-8.7	0	0	42
35	YMDB00097	Adenosine monophosphate	-8.7	2	0	65
36	YMDB01492	3-Carboxy-2,3,4,9-tetrahydro-1H-pyrido	-8.7	0	0	45
37	YMDB01777	Quercetin	-8.6	1	0	47
38	YMDB16098	beta-Calacorene	-8.6	0	0	38
39	YMDB01722	Kaempferol	-8.6	2	0	39
40	YMDB16091	alpha-Curcumene	-8.6	0	0	41
41	YMDB00728	(5S,6S)-di-HETE	-8.6	3	0	69
42	YMDB00336	benzoin	-8.6	0	0	52
43	YMDB00864	Dolichol phosphate	-8.6	2	0	60
44	YMDB00611	4alpha-methylzymosterol	-8.5	0	5	86
45	YMDB01664	Delphinidin	-8.5	0	2	59
46	YMDB01693	Fertaric acid	-8.5	1	0	53
47	YMDB00229	Farnesyl pyrophosphate	-8.5	1	0	60
48	YMDB00163	5-Amino-6-(5'-phosphoribosylamino)uracil	-8.5	3	0	53
49	YMDB01679	Ellagic acid	-8.5	2	0	41
50	YMDB00264	leukotriene A4	-8.5	2	0	68
51	YMDB16323	pyrithiamine	-8.5	2	0	62
52	YMDB16254	(2-amino-4-hydroxy-7,8-dihydropteridin-6-yl)methyl diphosphate	-8.5	6	0	38
53	YMDB00147	2,5-Diamino-4-hydroxy-6-(5-phosphoribosylamino)pyrimidine	-8.5	8	0	55
54	YMDB00916	dCDP	-8.5	2	0	45
55	YMDB00455	3',5'-cyclic CMP	-8.4	3	0	38
56	YMDB15973	Cadalene	-8.4	0	0	36
57	YMDB16082	Tdn	-8.4	0	0	36
58	YMDB01796	trans-Isohumulone	-8.4	2	0	75
59	YMDB00162	5-Thymidylic acid	-8.4	4	0	34
60	YMDB16103	beta-Sesquiphellandrene	-8.4	0	0	43
61	YMDB01726	Leucocyanidin	-8.4	1	1	65
62	YMDB00164	Thiamine monophosphate	-8.4	5	0	45
63	YMDB01576	1,1,6-Trimethyl-1,2-dihydronaphthalene	-8.4	0	0	37
64	YMDB01754	Myricetin	-8.3	2	0	54
65	YMDB00138	Nicotinamide ribotide	-8.3	3	0	54
66	YMDB00430	(2-Amino-4-hydroxy-7,8-dihydropteridin-6-yl)methyl trihydrogen diphosphate	-8.3	4	0	44
67	YMDB00729	Delta(6)-trans,Delta(8)-cis-leukotriene B4	-8.3	3	0	71
68	YMDB00356	(2-amino-4-hydroxy-7,8-dihydropteridin-6-yl)methyl diphosphate(3-)	-8.3	4	0	42
69	YMDB16193	Acetyl adenylate	-8.3	5	2	62
70	YMDB16090	alpha-Calacorene	-8.3	0	0	39
71	YMDB00741	nicotinic acid D-ribonucleotide	-8.3	2	0	55
72	YMDB00506	dGMP	-8.2	2	0	47
73	YMDB00823	N-acetyl-D-tryptophan	-8.2	2	0	39
74	YMDB00668	7,8-dihydroneopterin 3'-phosphate	-8.2	4	0	40
75	YMDB01742	Methional	-8.2	2	0	44
76	YMDB00010	4-(2-Aminophenyl)-2,4-dioxobutanoic acid	-8.2	3	0	45
77	YMDB16109	delta-Cadinene	-8.2	0	0	45
78	YMDB15992	Edulan i	-8.2	0	0	22
79	YMDB00150	5'-Deoxyadenosine	-8.2	2	0	37
80	YMDB16032	Isolongifolene, 4,5,9,10-dehydro-	-8.2	0	0	32
81	YMDB00730	leukotriene B4	-8.1	0	0	74
82	YMDB16237	N5-Carboxyaminoimidazole ribonucleotide	-8.1	2	0	43
83	YMDB00179	(1S,2R)-1-C-(indol-3-yl)glycerol 3-phosphate	-8.1	6	0	37
84	YMDB00251	1-(2-carboxyphenylamino)-1-deoxy-D-ribulose 5-phosphate	-8.1	4	0	50
85	YMDB01775	Piceatannol	-8.1	2	0	55
86	YMDB02308	Diphenylketone	-8.1	1	0	22
87	YMDB01733	Malvidin	-8.1	1	3	58
88	YMDB16277	1-C-(3-indolyl)-glycerol 3-phosphate	-8.1	4	0	36
89	YMDB01780	Resveratrol	-8.1	2	0	53
90	YMDB15964	Aromadendrene	-8.1	0	2	46
