# Supplementary material for: Investigation of the Entry Pathway and Molecular Nature of σ1 Receptor Ligands
Source: Int J Mol Sci. 2023 Mar 28;24(7):6367. doi: 10.3390/ijms24076367 (PMC10094450; doi:10.3390/ijms24076367)
Supplement: Supplementary file 1 [file ijms-24-06367-s001.zip › Supplementary-Table-S7_VS-7W2E.xlsx]

## Sheet: 7W2E
	Database ID	Compound name	Ecalc	HB	CL	Contacts				World_Not_FDA	Metab	FDA	ErgP	Sterols	Agonists-Antagonists	CholP	Sterol_Lipids	Steroids	Androgens	DeltaL	Estrogens
1	YMDB00608	zymosterol intermediate 2	-10.8	0	1	73				0	0	0	0	0	0	0	0	0	0	0	0
2	YMDB00609	3-dehydro-4-methylzymosterol	-10.6	1	0	82				0	0	0	0	0	0	0	0	0	0	0	0
3	YMDB00548	zymosterol	-10.3	0	1	78
4	YMDB00540	episterol	-10.2	0	0	93
5	YMDB16151	Desmosterol	-10.1	0	1	79
6	YMDB02310	Tehydroabietic acid	-10	0	0	54
7	YMDB16191	3-Keto-4-methylzymosterol	-10	0	3	93
8	YMDB16321	5,7,24(28)-Ergostatrienol	-9.9	0	1	85
9	YMDB00611	4alpha-methylzymosterol	-9.8	0	3	84
10	YMDB00293	7,8-Dihydropteroic acid	-9.8	5	0	43
11	YMDB01765	Peonidin	-9.6	2	0	60
12	YMDB00606	ergosta-5,7,22,24(28)-tetraen-3beta-ol	-9.6	0	2	80
13	YMDB00452	3',5'-cyclic dAMP	-9.6	2	0	32
14	YMDB00453	3',5'-cyclic IMP	-9.5	4	0	34
15	YMDB01659	Cyanidin	-9.5	0	0	39
16	YMDB00023	3',5'-cyclic AMP	-9.4	3	0	35
17	YMDB01653	Catechin	-9.4	3	0	31
18	YMDB01682	Epigallocatechin	-9.3	4	0	32
19	YMDB00229	Farnesyl pyrophosphate	-9.2	2	0	55
20	YMDB00325	2-trans,6-trans-farnesyl diphosphate	-9.2	3	0	62
21	YMDB01754	Myricetin	-9.1	2	0	43
22	YMDB00136	benzil	-9.1	0	0	35
23	YMDB01489	7,8-Didehydrodesmosterol	-9.1	0	6	91
24	YMDB01777	Quercetin	-9	4	0	45
25	YMDB01483	2-(6-Hydroxy-2-methoxy-3,4-methylenedioxyphenyl)benzofuran	-9	2	1	51
26	YMDB01722	Kaempferol	-9	1	0	26
27	YMDB16254	(2-amino-4-hydroxy-7,8-dihydropteridin-6-yl)methyl diphosphate	-9	5	0	39
28	YMDB00506	dGMP	-8.9	5	0	50
29	YMDB00455	3',5'-cyclic CMP	-8.9	3	0	24
30	YMDB16104	beta-Vetivenene	-8.9	0	0	32
31	YMDB00336	benzoin	-8.9	0	0	39
32	YMDB00454	3',5'-cyclic GMP	-8.9	4	0	45
33	YMDB00430	(2-Amino-4-hydroxy-7,8-dihydropteridin-6-yl)methyl trihydrogen diphosphate	-8.8	4	0	32
34	YMDB01664	Delphinidin	-8.8	3	0	40
35	YMDB00356	(2-amino-4-hydroxy-7,8-dihydropteridin-6-yl)methyl diphosphate(3-)	-8.8	4	0	34
36	YMDB01720	Isorhamnetin	-8.8	1	1	37
37	YMDB00186	4-alpha-Methyl-5-alpha-cholest-7-en-3-one	-8.7	1	4	99
38	YMDB01775	Piceatannol	-8.7	2	0	43
39	YMDB01733	Malvidin	-8.7	2	2	55
40	YMDB00097	Adenosine monophosphate	-8.7	3	0	39
41	YMDB00605	ergosta-5,7,24(28)-trien-3beta-ol	-8.7	0	4	96
42	YMDB00565	2',3'-cyclic AMP	-8.6	1	0	43
43	YMDB16098	beta-Calacorene	-8.6	0	0	31
44	YMDB00545	24-methylidene-5alpha-cholest-8-en-3beta-ol	-8.6	1	3	96
45	YMDB00451	dAMP	-8.6	4	0	37
46	YMDB00163	5-Amino-6-(5'-phosphoribosylamino)uracil	-8.6	4	0	44
47	YMDB00352	Inosinic acid	-8.6	3	0	52
48	YMDB00289	Xanthylic acid	-8.6	4	1	52
49	YMDB00313	Cholesterol	-8.6	0	2	88
50	YMDB01492	3-Carboxy-2,3,4,9-tetrahydro-1H-pyrido	-8.6	3	0	36
51	YMDB02320	Dehydroergosterol	-8.6	0	2	90
52	YMDB16032	Isolongifolene, 4,5,9,10-dehydro-	-8.6	0	0	36
53	YMDB00916	dCDP	-8.6	5	0	44
54	YMDB00746	dUDP	-8.5	2	0	42
55	YMDB00823	N-acetyl-D-tryptophan	-8.5	0	0	48
56	YMDB00050	8-Oxo-dGMP	-8.5	1	0	37
57	YMDB01796	trans-Isohumulone	-8.5	1	2	65
58	YMDB00766	6,7-Dimethyl-8-(1-D-ribityl)lumazine	-8.5	6	0	60
59	YMDB01780	Resveratrol	-8.5	3	0	35
60	YMDB16103	beta-Sesquiphellandrene	-8.5	0	0	43
61	YMDB16091	alpha-Curcumene	-8.4	0	0	38
62	YMDB02308	Diphenylketone	-8.4	0	0	25
63	YMDB16109	delta-Cadinene	-8.4	0	0	37
64	YMDB16193	Acetyl adenylate	-8.4	5	0	62
65	YMDB00162	5-Thymidylic acid	-8.4	1	0	43
66	YMDB16311	5-Amino-2,6-dioxy-4-(5'-phospho-D-ribitylamino)pyrimidine	-8.4	6	0	62
67	YMDB00058	Adenosine	-8.3	1	0	46
68	YMDB00193	Nicotinic acid mononucleotide	-8.3	3	0	41
69	YMDB00780	Pseudouridine 5'-phosphate	-8.3	2	0	37
70	YMDB00054	N-(5-phospho-beta-D-ribosyl)anthranilic acid	-8.3	8	1	54
71	YMDB16090	alpha-Calacorene	-8.3	0	0	29
72	YMDB16323	pyrithiamine	-8.3	2	0	42
73	YMDB00543	ergosterol	-8.3	0	5	100
74	YMDB16309	2,5-Diamino-6-(1-D-ribosylamino)pyrimidin-4(3H)-one 5'-phosphate	-8.3	7	2	58
75	YMDB00164	Thiamine monophosphate	-8.3	3	0	45
76	YMDB00077	5-amino-1-(5-phospho-D-ribosyl)imidazole-4-carboxylate	-8.2	2	0	34
77	YMDB00562	5-Amino-1-(5-phospho-D-ribosyl)imidazole-4-carboxamide	-8.2	4	0	40
78	YMDB00138	Nicotinamide ribotide	-8.2	5	0	45
79	YMDB01693	Fertaric acid	-8.2	3	0	50
80	YMDB00221	dUMP	-8.2	2	0	34
81	YMDB16082	Tdn	-8.2	0	0	20
82	YMDB15942	2,4-di-tert-Butylphenol	-8.2	0	0	45
83	YMDB00147	2,5-Diamino-4-hydroxy-6-(5-phosphoribosylamino)pyrimidine	-8.2	6	1	57
84	YMDB00261	Guanosine monophosphate	-8.2	3	0	44
85	YMDB00709	1-C-(indol-3-yl)glycerol 3-phosphate	-8.2	2	0	32
86	YMDB00049	Uridine 5'-monophosphate	-8.2	1	0	45
87	YMDB01576	1,1,6-Trimethyl-1,2-dihydronaphthalene	-8.2	0	0	21
88	YMDB16237	N5-Carboxyaminoimidazole ribonucleotide	-8.1	4	0	38
89	YMDB00297	S-Adenosylmethionine	-8.1	4	1	85
90	YMDB00668	7,8-dihydroneopterin 3'-phosphate	-8.1	2	0	33
91	YMDB00729	Delta(6)-trans,Delta(8)-cis-leukotriene B4	-8.1	3	0	60
92	YMDB01481	Acadesine	-8.1	4	0	43
93	YMDB15973	Cadalene	-8.1	0	0	30
94	YMDB00728	(5S,6S)-di-HETE	-8.1	1	0	59
95	YMDB15992	Edulan i	-8.1	0	0	32
96	YMDB00670	geranyl diphosphate	-8.1	4	0	40
97	YMDB00741	nicotinic acid D-ribonucleotide	-8.1	3	0	41
98	YMDB00266	Geranyl-PP	-8.1	2	0	48
99	YMDB00864	Dolichol phosphate	-8.1	2	0	44
100	YMDB00025	Orotidylic acid	-8.1	5	1	53
101	YMDB01646	Caftaric acid	-8	3	0	43
102	YMDB00730	leukotriene B4	-8	4	0	72
103	YMDB00281	Phosphoribosyl formamidocarboxamide	-8	3	0	40
104	YMDB01739	Megastigmatrienone	-8	0	0	32
105	YMDB00998	D-Tryptophan,N	-8	4	0	28
106	YMDB00179	(1S,2R)-1-C-(indol-3-yl)glycerol 3-phosphate	-8	4	0	31
107	YMDB00300	5-Amino-6-(5'-phosphoribitylamino)uracil	-8	3	0	52
108	YMDB00425	5-Amino-6-(5-phospho-D-ribitylamino)uracil	-8	4	0	56
109	YMDB01742	Methional	-8	0	0	36
110	YMDB16277	1-C-(3-indolyl)-glycerol 3-phosphate	-8	4	0	28
111	YMDB01679	Ellagic acid	-8	3	1	47
112	YMDB00264	leukotriene A4	-8	0	0	58
113	YMDB00438	S-Adenosyl-L-methionine	-8	2	0	88
114	YMDB15982	Dehydro-beta-ionone	-8	1	0	29
115	YMDB00206	dCMP	-8	3	0	40
116	YMDB00505	2'-Deoxyguanosine	-8	3	0	35
117	YMDB15922	1,7-Dimethylnaphthalene	-8	0	0	21
118	YMDB00150	5'-Deoxyadenosine	-8	3	0	32
119	YMDB01726	Leucocyanidin	-8	2	0	43
120	YMDB00406	Cytidine monophosphate	-7.9	5	0	43
121	YMDB16310	2,5-Diamino-6-(1-D-ribitylamino)pyrimidin-4(3H)-one 5'-phosphate	-7.9	6	0	52
122	YMDB01575	1-Methyladenosine	-7.9	3	0	30
123	YMDB01725	Kynurenic acid	-7.9	1	0	23
124	YMDB00511	xanthosine	-7.9	3	0	40
125	YMDB01807	Xanthurenic acid	-7.9	2	0	28
126	YMDB00509	Guanosine	-7.9	3	0	34
127	YMDB00895	Melibiose	-7.9	2	0	55
128	YMDB01791	Terpinyl acetate	-7.9	1	0	33
129	YMDB02304	Isomaltose	-7.9	4	0	56
130	YMDB00103	Nicotinamide riboside	-7.8	1	0	37
131	YMDB16093	alpha-Farnesene	-7.8	0	0	39
132	YMDB00251	1-(2-carboxyphenylamino)-1-deoxy-D-ribulose 5-phosphate	-7.8	7	0	42
133	YMDB00503	2'-Deoxyadenosine	-7.8	3	0	28
134	YMDB00010	4-(2-Aminophenyl)-2,4-dioxobutanoic acid	-7.8	1	0	32
135	YMDB15913	(z)-beta-Damascenone	-7.8	0	0	26
136	YMDB00860	N-Acetyl-D-phenylalanine	-7.8	3	0	44
137	YMDB01715	Humulene	-7.8	0	0	44
138	YMDB00169	3-(indol-3-yl)pyruvic acid	-7.8	1	0	22
139	YMDB00971	4-methylumbelliferone	-7.8	1	0	18
140	YMDB00510	Inosine	-7.8	2	0	23
141	YMDB01643	beta-Ionone	-7.8	1	0	27
142	YMDB16094	alpha-Ionone	-7.8	1	0	30
143	YMDB00737	N-acetyl-D-glucosamine 6-phosphate	-7.8	0	0	53
