# Supplementary material for: Investigation of the Entry Pathway and Molecular Nature of σ1 Receptor Ligands
Source: Int J Mol Sci. 2023 Mar 28;24(7):6367. doi: 10.3390/ijms24076367 (PMC10094450; doi:10.3390/ijms24076367)
Supplement: Supplementary file 1 [file ijms-24-06367-s001.zip › Supplementary-Table-S8_VS-7W2B-7W2E.xlsx]

## Sheet: 7W2B-7W2E
	A) 7W2B and 7W2E ligands (88)
			Ecalc
	Database ID	Compound Name	7W2B	7W2E
1	YMDB00608	zymosterol_intermediate_2	-9.9	-10.8
2	YMDB00609	3-dehydro-4-methylzymosterol	-8.9	-10.6
3	YMDB00548	zymosterol	-9.7	-10.3
4	YMDB00540	episterol	-9.7	-10.2
5	YMDB16151	Desmosterol	-10.1	-10.1
6	YMDB02310	Tehydroabietic_acid	-9.8	-10
7	YMDB16321	5,7,24(28)-Ergostatrienol	-10.9	-9.9
8	YMDB00293	7,8-Dihydropteroic_acid	-9.8	-9.8
9	YMDB00611	4alpha-methylzymosterol	-8.5	-9.8
10	YMDB00606	ergosta-5,7,22,24(28)-tetraen-3beta-ol	-11.1	-9.6
11	YMDB01765	Peonidin	-9.5	-9.6
12	YMDB00452	3',5'-cyclic_dAMP	-9.3	-9.6
13	YMDB01659	Cyanidin	-9.5	-9.5
14	YMDB00453	3',5'-cyclic_IMP	-9.2	-9.5
15	YMDB00023	3',5'-cyclic_AMP	-9.5	-9.4
16	YMDB01653	Catechin	-8.9	-9.4
17	YMDB01682	Epigallocatechin	-8.8	-9.3
18	YMDB00325	2-trans,6-trans-farnesyl_diphosphate	-8.8	-9.2
19	YMDB00229	Farnesyl_pyrophosphate	-8.5	-9.2
20	YMDB01489	7,8-Didehydrodesmosterol	-9.4	-9.1
21	YMDB00136	benzil	-8.7	-9.1
22	YMDB01754	Myricetin	-8.3	-9.1
23	YMDB01483	2-(6-Hydroxy-2-methoxy-3,4-methylenedioxyphenyl)benzofuran	-9.3	-9
24	YMDB01777	Quercetin	-8.6	-9
25	YMDB01722	Kaempferol	-8.6	-9
26	YMDB16254	(2-amino-4-hydroxy-7,8-dihydropteridin-6-yl)methyl_diphosphate	-8.5	-9
27	YMDB00454	3',5'-cyclic_GMP	-10.1	-8.9
28	YMDB16104	beta-Vetivenene	-9.2	-8.9
29	YMDB00336	benzoin	-8.6	-8.9
30	YMDB00455	3',5'-cyclic_CMP	-8.4	-8.9
31	YMDB00506	dGMP	-8.2	-8.9
32	YMDB01720	Isorhamnetin	-8.8	-8.8
33	YMDB01664	Delphinidin	-8.5	-8.8
34	YMDB00430	(2-Amino-4-hydroxy-7,8-dihydropteridin-6-yl)methyl_trihydrogen_diphosphate	-8.3	-8.8
35	YMDB00356	(2-amino-4-hydroxy-7,8-dihydropteridin-6-yl)methyl_diphosphate(3-)	-8.3	-8.8
36	YMDB00605	ergosta-5,7,24(28)-trien-3beta-ol	-10.4	-8.7
37	YMDB00186	4-alpha-Methyl-5-alpha-cholest-7-en-3-one	-9.9	-8.7
38	YMDB00097	Adenosine_monophosphate	-8.7	-8.7
39	YMDB01775	Piceatannol	-8.1	-8.7
40	YMDB01733	Malvidin	-8.1	-8.7
41	YMDB00313	Cholesterol	-10	-8.6
42	YMDB02320	Dehydroergosterol	-9.6	-8.6
43	YMDB00565	2',3'-cyclic_AMP	-8.9	-8.6
44	YMDB00451	dAMP	-8.9	-8.6
45	YMDB00545	24-methylidene-5alpha-cholest-8-en-3beta-ol	-8.7	-8.6
46	YMDB01492	3-Carboxy-2,3,4,9-tetrahydro-1H-pyrido	-8.7	-8.6
47	YMDB16098	beta-Calacorene	-8.6	-8.6
48	YMDB00163	5-Amino-6-(5'-phosphoribosylamino)uracil	-8.5	-8.6
49	YMDB00916	dCDP	-8.5	-8.6
50	YMDB16032	Isolongifolene,_4,5,9,10-dehydro-	-8.2	-8.6
51	YMDB00050	8-Oxo-dGMP	-9.3	-8.5
52	YMDB01796	trans-Isohumulone	-8.4	-8.5
53	YMDB16103	beta-Sesquiphellandrene	-8.4	-8.5
54	YMDB00823	N-acetyl-D-tryptophan	-8.2	-8.5
55	YMDB01780	Resveratrol	-8.1	-8.5
56	YMDB16091	alpha-Curcumene	-8.6	-8.4
57	YMDB00162	5-Thymidylic_acid	-8.4	-8.4
58	YMDB16193	Acetyl_adenylate	-8.3	-8.4
59	YMDB16109	delta-Cadinene	-8.2	-8.4
60	YMDB02308	Diphenylketone	-8.1	-8.4
61	YMDB00543	ergosterol	-10.2	-8.3
62	YMDB16323	pyrithiamine	-8.5	-8.3
63	YMDB00164	Thiamine_monophosphate	-8.4	-8.3
64	YMDB16090	alpha-Calacorene	-8.3	-8.3
65	YMDB01693	Fertaric_acid	-8.5	-8.2
66	YMDB00147	2,5-Diamino-4-hydroxy-6-(5-phosphoribosylamino)pyrimidine	-8.5	-8.2
67	YMDB16082	Tdn	-8.4	-8.2
68	YMDB01576	1,1,6-Trimethyl-1,2-dihydronaphthalene	-8.4	-8.2
69	YMDB00138	Nicotinamide_ribotide	-8.3	-8.2
70	YMDB00728	(5S,6S)-di-HETE	-8.6	-8.1
71	YMDB00864	Dolichol_phosphate	-8.6	-8.1
72	YMDB15973	Cadalene	-8.4	-8.1
73	YMDB00729	Delta(6)-trans,Delta(8)-cis-leukotriene_B4	-8.3	-8.1
74	YMDB00741	nicotinic_acid_D-ribonucleotide	-8.3	-8.1
75	YMDB00668	7,8-dihydroneopterin_3'-phosphate	-8.2	-8.1
76	YMDB15992	Edulan_i	-8.2	-8.1
77	YMDB16237	N5-Carboxyaminoimidazole_ribonucleotide	-8.1	-8.1
78	YMDB01646	Caftaric_acid	-8.7	-8
79	YMDB01679	Ellagic_acid	-8.5	-8
80	YMDB00264	leukotriene_A4	-8.5	-8
81	YMDB01726	Leucocyanidin	-8.4	-8
82	YMDB01742	Methional	-8.2	-8
83	YMDB00150	5'-Deoxyadenosine	-8.2	-8
84	YMDB00730	leukotriene_B4	-8.1	-8
85	YMDB00179	(1S,2R)-1-C-(indol-3-yl)glycerol_3-phosphate	-8.1	-8
86	YMDB16277	1-C-(3-indolyl)-glycerol_3-phosphate	-8.1	-8
87	YMDB00010	4-(2-Aminophenyl)-2,4-dioxobutanoic_acid	-8.2	-7.8
88	YMDB00251	1-(2-carboxyphenylamino)-1-deoxy-D-ribulose_5-phosphate	-8.1	-7.8
	B) 7W2B ligands (2)		Ecalc
	Database ID	Compound Name	7W2B	7W2E
1	YMDB00534	Riboflavin	-8.9	0
2	YMDB15964	Aromadendrene	-8.1	0
	C) 7W2E ligands (56)		Ecalc
	Database ID	Compound Name	7W2B	7W2E
1	YMDB16191	3-Keto-4-methylzymosterol	0	-10
2	YMDB00289	Xanthylic_acid	0	-8.6
3	YMDB00352	Inosinic_acid	0	-8.6
4	YMDB00746	dUDP	0	-8.5
5	YMDB00766	6,7-Dimethyl-8-(1-D-ribityl)lumazine	0	-8.5
6	YMDB01780	Resveratrol	0	-8.5
7	YMDB16311	5-Amino-2,6-dioxy-4-(5'-phospho-D-ribitylamino)pyrimidine	0	-8.4
8	YMDB00054	N-(5-phospho-beta-D-ribosyl)anthranilic_acid	0	-8.3
9	YMDB00058	Adenosine	0	-8.3
10	YMDB00780	Pseudouridine_5'-phosphate	0	-8.3
11	YMDB00193	Nicotinic_acid_mononucleotide	0	-8.3
12	YMDB16309	2,5-Diamino-6-(1-D-ribosylamino)pyrimidin-4(3H)-one_5'-phosphate	0	-8.3
13	YMDB15942	2,4-di-tert-Butylphenol	0	-8.2
14	YMDB00077	5-amino-1-(5-phospho-D-ribosyl)imidazole-4-carboxylate	0	-8.2
15	YMDB00261	Guanosine_monophosphate	0	-8.2
16	YMDB00562	5-Amino-1-(5-phospho-D-ribosyl)imidazole-4-carboxamide	0	-8.2
17	YMDB00221	dUMP	0	-8.2
18	YMDB00049	Uridine_5'-monophosphate	0	-8.2
19	YMDB00709	1-C-(indol-3-yl)glycerol_3-phosphate	0	-8.2
20	YMDB01481	Acadesine	0	-8.1
21	YMDB00670	geranyl_diphosphate	0	-8.1
22	YMDB00025	Orotidylic_acid	0	-8.1
23	YMDB00266	Geranyl-PP	0	-8.1
24	YMDB00297	S-Adenosylmethionine	0	-8.1
25	YMDB00300	5-Amino-6-(5'-phosphoribitylamino)uracil	0	-8
26	YMDB15982	Dehydro-beta-ionone	0	-8
27	YMDB00998	D-Tryptophan,N	0	-8
28	YMDB00425	5-Amino-6-(5-phospho-D-ribitylamino)uracil	0	-8
29	YMDB01739	Megastigmatrienone	0	-8
30	YMDB00438	S-Adenosyl-L-methionine	0	-8
31	YMDB00281	Phosphoribosyl_formamidocarboxamide	0	-8
32	YMDB00505	2'-Deoxyguanosine	0	-8
33	YMDB00206	dCMP	0	-8
34	YMDB15922	1,7-Dimethylnaphthalene	0	-8
35	YMDB01725	Kynurenic_acid	0	-7.9
36	YMDB02304	Isomaltose	0	-7.9
37	YMDB00509	Guanosine	0	-7.9
38	YMDB00895	Melibiose	0	-7.9
39	YMDB00511	xanthosine	0	-7.9
40	YMDB01807	Xanthurenic_acid	0	-7.9
41	YMDB01575	1-Methyladenosine	0	-7.9
42	YMDB01791	Terpinyl_acetate	0	-7.9
43	YMDB00406	Cytidine_monophosphate	0	-7.9
44	YMDB16310	2,5-Diamino-6-(1-D-ribitylamino)pyrimidin-4(3H)-one_5'-phosphate	0	-7.9
45	YMDB00971	4-methylumbelliferone	0	-7.8
46	YMDB01715	Humulene	0	-7.8
47	YMDB00103	Nicotinamide_riboside	0	-7.8
48	YMDB01643	beta-Ionone	0	-7.8
49	YMDB00737	N-acetyl-D-glucosamine_6-phosphate	0	-7.8
50	YMDB16094	alpha-Ionone	0	-7.8
51	YMDB15913	(z)-beta-Damascenone	0	-7.8
52	YMDB00510	Inosine	0	-7.8
53	YMDB00503	2'-Deoxyadenosine	0	-7.8
54	YMDB00169	3-(indol-3-yl)pyruvic_acid	0	-7.8
55	YMDB00860	N-Acetyl-D-phenylalanine	0	-7.8
56	YMDB16093	alpha-Farnesene	0	-7.8
